# Supplementary material for: What Drives Radical Halogenation versus Hydroxylation in Mononuclear Nonheme Iron Complexes? A Combined Experimental and Computational Study
Source: PubMed Central journal article supplement (PMC9228086; doi:10.1021/jacs.2c01375), 2022-05-10
Supplement: ja2c01375_si_001.pdf [file ja2c01375_si_001.pdf]

# Supporting Information

## What Drives Radical Halogenation Versus Hydroxylation in Mononuclear Nonheme Iron Complexes? A Combined Experimental and Computational Study

Emilie F. Gérard,<sup>§‡</sup> Vishal Yadav,<sup>&‡</sup> David P. Goldberg<sup>\*&</sup> and Sam P. de Visser<sup>\*§‡</sup>

<sup>§</sup> Manchester Institute of Biotechnology, The University of Manchester, 131 Princess Street, Manchester M1 7DN, United Kingdom

<sup>‡</sup> Department of Chemical Engineering, The University of Manchester, Oxford Road, Manchester M13 9PL, United Kingdom

<sup>&</sup> Department of Chemistry, The Johns Hopkins University, 3400 North Charles Street, Baltimore, Maryland 21218, United States.

Email: [sam.devisser@manchester.ac.uk](mailto:sam.devisser@manchester.ac.uk) (SPdV); [dpg@jhu.edu](mailto:dpg@jhu.edu) (DPG).

## Computational Data:

**Table S1.** Absolute energies, zero-point energies and free energies (in a.u.) of optimized geometries for the reaction of  $[\text{Fe}^{\text{III}}(\text{BNPA}^{\text{Ph}_2\text{O}})(\text{OH})(\text{Cl})]$  ( $1_{\text{Cl}}$ ) with the radical substrate ( $p\text{-Cl-C}_6\text{H}_4$ ) $_3\text{C}\cdot$  as obtained in Gaussian-09 in the quintet spin state. All calculations were done with a continuum polarized conductor model (CPCM) included with the solvent THF that has a dielectric constant of 7.6.

|                                                                                       | E [au]       | ZPE [au]  | G [au]       | E [au]       |
|---------------------------------------------------------------------------------------|--------------|-----------|--------------|--------------|
|                                                                                       | B3LYP/BS1    | B3LYP/BS1 | B3LYP/BS1    | B3LYP/BS2    |
| $^6[\text{Fe}^{\text{III}}(\text{BNPA}^{\text{Ph}_2\text{O}})(\text{OH})(\text{Cl})]$ | -2407.708188 | 0.78465   | -2407.003296 | -2403.445439 |
| $^4[\text{Fe}^{\text{III}}(\text{BNPA}^{\text{Ph}_2\text{O}})(\text{OH})(\text{Cl})]$ | -2407.697646 | 0.78595   | -2406.990971 | -            |
| $^2[\text{Fe}^{\text{III}}(\text{BNPA}^{\text{Ph}_2\text{O}})(\text{OH})(\text{Cl})]$ | -2407.692934 | 0.78682   | -2406.983804 | -            |
| $(p\text{-Cl-C}_6\text{H}_4)_3\text{C}\cdot$                                          | -2111.594199 | 0.25193   | -2111.391251 | -2112.063601 |
| $^5\text{Re}_{1\text{Cl}}$                                                            | -4519.316207 | 1.036712  | -4518.392554 | -4515.545298 |
| $^3\text{Re}_{1\text{Cl}}$                                                            | -4519.302823 | 1.038072  | -4518.374585 | -            |
| $^7\text{Re}_{1\text{Cl}}$                                                            | -4519.316206 | 1.036714  | -4518.392855 | -            |
| $^5\text{TS}_{\text{Cl},1\text{Cl}}$                                                  | -4519.288773 | 1.035939  | -4518.356487 | -4515.505285 |
| $^5\text{Pr}_{\text{Cl},1\text{Cl}}$                                                  | -4519.296217 | 1.035849  | -4518.372350 | -4515.535718 |
| $^5\text{TS}_{\text{OH},1\text{Cl}}$                                                  | -4519.272426 | 1.037323  | -4518.341912 | -4515.508975 |
| $^5\text{Pr}_{\text{OH},1\text{Cl}}$                                                  | -4519.331573 | 1.039142  | -4518.405548 | -4515.580205 |
| $^3\text{TS}_{\text{OH},1\text{Cl}}$                                                  | -4519.248011 | 1.039075  | -4518.313034 | -4515.458101 |
| $^3\text{Pr}_{\text{OH},1\text{Cl}}$                                                  | -4519.304936 | 1.040375  | -4518.375100 | -4515.535061 |
| $^3\text{Pr}_{\text{Cl},1\text{Cl}}$                                                  | -4519.274651 | 1.037250  | -4518.348422 | -4515.484995 |

**Table S2.** Relative energies, zero-point energies and free energies (in kcal mol $^{-1}$ ) of optimized geometries for the reaction of  $[\text{Fe}^{\text{III}}(\text{BNPA}^{\text{Ph}_2\text{O}})(\text{OH})(\text{Cl})]$  ( $1_{\text{Cl}}$ ) with the radical substrate ( $p\text{-Cl-C}_6\text{H}_4$ ) $_3\text{C}\cdot$  as obtained in Gaussian-09 in the quintet spin state.

|                                                                                       | $\Delta\text{E}$ | $\Delta\text{E}+\text{ZPE}$ | $\Delta\text{G}$ | $\Delta\text{E}$ | $\Delta\text{E}+\text{ZPE}$ | $\Delta\text{G}$ |
|---------------------------------------------------------------------------------------|------------------|-----------------------------|------------------|------------------|-----------------------------|------------------|
|                                                                                       | BS1              | BS1                         | BS1              | BS2              | BS2                         | BS2              |
| $^6[\text{Fe}^{\text{III}}(\text{BNPA}^{\text{Ph}_2\text{O}})(\text{OH})(\text{Cl})]$ | 0.00             | 0.00                        | 0.00             | 0.00             | 0.00                        | 0.00             |
| $^4[\text{Fe}^{\text{III}}(\text{BNPA}^{\text{Ph}_2\text{O}})(\text{OH})(\text{Cl})]$ | 6.61             | 7.43                        | 7.73             | -                | -                           | -                |
| $^2[\text{Fe}^{\text{III}}(\text{BNPA}^{\text{Ph}_2\text{O}})(\text{OH})(\text{Cl})]$ | 9.57             | 10.93                       | 12.23            | -                | -                           | -                |
| $^5\text{Re}_{1\text{Cl}}$                                                            | 0.00             | 0.00                        | 0.00             | 0.00             | 0.00                        | 0.00             |
| $^3\text{Re}_{1\text{Cl}}$                                                            | 8.40             | 9.25                        | 11.28            | -                | -                           | -                |
| $^7\text{Re}_{1\text{Cl}}$                                                            | 0.00             | 0.00                        | -0.19            | -                | -                           | -                |
| $^5\text{TS}_{\text{Cl},1\text{Cl}}$                                                  | 17.22            | 16.73                       | 22.63            | 25.11            | 24.62                       | 30.53            |
| $^5\text{Pr}_{\text{Cl},1\text{Cl}}$                                                  | 12.54            | 12.00                       | 12.68            | 6.01             | 5.47                        | 6.15             |
| $^5\text{TS}_{\text{OH},1\text{Cl}}$                                                  | 27.47            | 27.86                       | 31.78            | 22.79            | 23.18                       | 27.10            |
| $^5\text{Pr}_{\text{OH},1\text{Cl}}$                                                  | -9.64            | -8.12                       | -8.15            | -21.90           | -20.38                      | -20.42           |
| $^3\text{TS}_{\text{OH},1\text{Cl}}$                                                  | 42.79            | 44.28                       | 49.90            | 54.72            | 56.20                       | 61.82            |
| $^3\text{Pr}_{\text{OH},1\text{Cl}}$                                                  | 7.07             | 9.37                        | 10.95            | 6.42             | 8.72                        | 10.30            |
| $^3\text{Pr}_{\text{Cl},1\text{Cl}}$                                                  | 26.08            | 26.41                       | 27.69            | 37.84            | 38.18                       | 39.46            |

**Table S3.** Group spin densities of UB3LYP/BS1+solvent optimized geometries for the reaction pathway of [Fe<sup>III</sup>(BNPA<sup>Ph2</sup>O)(OH)(Cl)] (**1<sub>Cl</sub>**) with the radical substrate (*p*-Cl-C<sub>6</sub>H<sub>4</sub>)<sub>3</sub>C• as obtained in Gaussian-09 in the quintet spin state.

|                                          | $\rho_{\text{Fe}}$ | $\rho_{\text{ligand}}$ | $\rho_{\text{OH}}$ | $\rho_{\text{Cl}}$ | $\rho_{\text{Trityl}}$ |
|------------------------------------------|--------------------|------------------------|--------------------|--------------------|------------------------|
| <sup>5</sup> <b>Re</b> <sub>1Cl</sub>    | 4.02               | 0.65                   | 0.19               | 0.14               | -1.00                  |
| <sup>5</sup> <b>TS</b> <sub>Cl,1Cl</sub> | 3.95               | 0.52                   | 0.17               | 0.11               | -0.75                  |
| <sup>5</sup> <b>Pr</b> <sub>Cl,1Cl</sub> | 3.69               | 0.24                   | 0.07               | 0.00               | 0.00                   |
| <sup>5</sup> <b>TS</b> <sub>OH,1Cl</sub> | 3.79               | 0.30                   | 0.12               | 0.06               | -0.27                  |
| <sup>5</sup> <b>Pr</b> <sub>OH,1Cl</sub> | 3.68               | 0.29                   | 0.00               | 0.03               | 0.00                   |

**Table S4.** Absolute energies, zero-point energies and free energies (in a.u.) of optimized geometries for the reaction of [Fe<sup>III</sup>(BNPA<sup>Ph2</sup>O)(OH)(Br)] (**1<sub>Br</sub>**) with the radical substrate (*p*-Cl-C<sub>6</sub>H<sub>4</sub>)<sub>3</sub>C• as obtained in Gaussian-09 in the quintet spin state. All calculations were done with a continuum polarized conductor model (CPCM) included with the solvent THF that has a dielectric constant of 7.6.

|                                                                 | E [au]       | ZPE [au]  | G [au]       | E <sub>solv</sub> [au] |
|-----------------------------------------------------------------|--------------|-----------|--------------|------------------------|
|                                                                 | B3LYP/BS1    | B3LYP/BS1 | B3LYP/BS1    | B3LYP/BS2              |
| [Fe <sup>III</sup> (BNPA <sup>Ph2</sup> O)(OH)(Br)]             | -4518.908211 | 0.784449  | -4518.203936 | -4517.354653           |
| ( <i>p</i> -Cl-C <sub>6</sub> H <sub>4</sub> ) <sub>3</sub> -C• | -2111.594199 | 0.251930  | -2111.391251 | -2112.063601           |
| <sup>5</sup> Re <sub>1Br</sub>                                  | -6630.516109 | 1.036479  | -6629.594789 | -6629.465928           |
| <sup>5</sup> TS <sub>Br,1Br</sub>                               | -6630.492889 | 1.035075  | -6629.569810 | -6629.443573           |
| <sup>5</sup> Pr <sub>Br,1Br</sub>                               | -6630.499814 | 1.035645  | -6629.578175 | -6629.455477           |
| <sup>5</sup> TS <sub>OH,1Br</sub>                               | -6630.472378 | 1.037407  | -6629.540904 | -6629.429199           |
| <sup>5</sup> Pr <sub>OH,1Br</sub>                               | -6630.532807 | 1.038817  | -6629.608811 | -6629.499173           |
| <sup>3</sup> Re <sub>1Br</sub>                                  | -6630.504381 | 1.037678  | -6629.581199 | -                      |
| <sup>3</sup> TS <sub>OH,1Br</sub>                               | -6630.447891 | 1.039140  | -6629.512545 | -                      |
| <sup>3</sup> TS <sub>Br,1Br</sub>                               | -6630.473500 | 1.036114  | -6629.549958 | -6629.390046           |
| <sup>3</sup> Pr <sub>Br,1Br</sub>                               | -6630.478697 | 1.036852  | -6629.553925 | -6629.404881           |

**Table S5.** Relative energies, zero-point energies and free energies (in kcal mol<sup>-1</sup>) of optimized geometries for the reaction of [Fe<sup>III</sup>(BNPA<sup>Ph2</sup>O)(OH)(Br)] (**1<sub>Br</sub>**) with the radical substrate (*p*-Cl-C<sub>6</sub>H<sub>4</sub>)<sub>3</sub>C• as obtained in Gaussian-09 in the quintet spin state.

|                                   | ΔE     | ΔE+ZPE | ΔG    | ΔE     | ΔE+ZPE | ΔG     |
|-----------------------------------|--------|--------|-------|--------|--------|--------|
|                                   | BS1    | BS1    | BS1   | BS2    | BS2    | BS2    |
| <sup>5</sup> Re <sub>1Br</sub>    | 0.00   | 0.00   | 0.00  | 0.00   | 0.00   | 0.00   |
| <sup>5</sup> TS <sub>Br,1Br</sub> | 14.57  | 13.69  | 15.67 | 14.03  | 13.15  | 15.13  |
| <sup>5</sup> Pr <sub>Br,1Br</sub> | 10.23  | 9.70   | 10.43 | 6.56   | 6.03   | 6.76   |
| <sup>5</sup> TS <sub>OH,1Br</sub> | 27.44  | 28.02  | 33.81 | 23.05  | 23.63  | 29.42  |
| <sup>5</sup> Pr <sub>OH,1Br</sub> | -10.48 | -9.01  | -8.80 | -20.86 | -19.39 | -19.18 |
| <sup>3</sup> Re <sub>1Br</sub>    | 7.36   | 8.11   | 8.53  | -      | -      | -      |
| <sup>3</sup> TS <sub>OH,1Br</sub> | 42.81  | 44.48  | 51.61 | -      | -      | -      |
| <sup>3</sup> TS <sub>Br,1Br</sub> | 26.74  | 26.51  | 28.13 | 47.62  | 47.39  | 49.01  |
| <sup>3</sup> Pr <sub>Br,1Br</sub> | 23.48  | 23.71  | 25.64 | 38.31  | 38.54  | 40.47  |

**Table S6.** Group spin densities of UB3LYP/BS1+solvent optimized geometries for the reaction pathway of [Fe<sup>III</sup>(BNPA<sup>Ph2</sup>O)(OH)(Br)] (**1<sub>Br</sub>**) with the radical substrate (*p*-Cl-C<sub>6</sub>H<sub>4</sub>)<sub>3</sub>C• as obtained in Gaussian-09 in the quintet spin state.

|                                   | ρ <sub>Fe</sub> | ρ <sub>ligand</sub> | ρ <sub>OH</sub> | ρ <sub>Br</sub> | ρ <sub>Trityl</sub> |
|-----------------------------------|-----------------|---------------------|-----------------|-----------------|---------------------|
| <sup>5</sup> Re <sub>1Br</sub>    | 4.00            | 0.65                | 0.19            | 0.15            | -1.00               |
| <sup>5</sup> TS <sub>Br,1Br</sub> | 3.79            | 0.32                | 0.10            | 0.06            | -0.27               |
| <sup>5</sup> Pr <sub>Br,1Br</sub> | 3.70            | 0.24                | 0.07            | 0.00            | 0.00                |
| <sup>5</sup> TS <sub>OH,1Br</sub> | 3.78            | 0.30                | 0.12            | 0.06            | -0.25               |
| <sup>5</sup> Pr <sub>OH,1Br</sub> | 3.68            | 0.29                | 0.00            | 0.03            | 0.00                |

**Table S7.** Absolute energies, zero-point energies and free energies (in a.u.) of optimized geometries for the reaction of  $[\text{Fe}^{\text{III}}(\text{BNPA}^{\text{Ph}_2\text{O}})(\text{OH})(\text{F})]$  ( $\mathbf{1}_F$ ) with the radical substrate ( $p\text{-Cl-C}_6\text{H}_4$ ) $_3\text{C}\cdot$  as obtained in Gaussian-09 in the quintet spin state. All calculations were done with a continuum polarized conductor model (CPCM) included with the solvent THF that has a dielectric constant of 7.6.

|                                                                                    | E [au]       | ZPE [au]  | G [au]       | $E_{\text{solv}}$ [au] |
|------------------------------------------------------------------------------------|--------------|-----------|--------------|------------------------|
|                                                                                    | B3LYP/BS1    | B3LYP/BS1 | B3LYP/BS1    | B3LYP/BS2              |
| $[\text{Fe}^{\text{III}}(\text{BNPA}^{\text{Ph}_2\text{O}})(\text{OH})(\text{F})]$ | -2047.333087 | 0.785089  | -2046.627815 | -2043.058184           |
| $(p\text{-Cl-C}_6\text{H}_4)_3\text{C}\cdot$                                       | -2111.594199 | 0.251930  | -2111.391251 | -2112.063601           |
| ${}^5\text{Re}_{1F}$                                                               | -4158.945642 | 1.037465  | -4158.016452 | -4155.158682           |
| ${}^3\text{Re}_{1F}$                                                               | -4158.934229 | 1.040304  | -4158.001853 | -                      |
| ${}^5\text{TS}_{F,1F}$                                                             | -4158.918480 | 1.036512  | -4157.987208 | -4155.152980           |
| ${}^5\text{Pr}_{F,1F}$                                                             | -4158.943593 | 1.037417  | -4158.018410 | -4155.189953           |
| ${}^5\text{TS}_{\text{OH},1F}$                                                     | -4158.895274 | 1.038019  | -4157.962729 | -4155.135486           |
| ${}^5\text{Pr}_{\text{OH},1F}$                                                     | -4158.976543 | 1.041215  | -4158.042794 | -4155.219276           |

**Table S8.** Relative energies, zero-point energies and free energies (in kcal mol $^{-1}$ ) of optimized geometries for the reaction of  $[\text{Fe}^{\text{III}}(\text{BNPA}^{\text{Ph}_2\text{O}})(\text{OH})(\text{F})]$  ( $\mathbf{1}_F$ ) with the radical substrate ( $p\text{-Cl-C}_6\text{H}_4$ ) $_3\text{C}\cdot$  as obtained in Gaussian-09 in the quintet spin state.

|                                | $\Delta E$ | $\Delta E + \text{ZPE}$ | $\Delta G$ | $\Delta E$ | $\Delta E + \text{ZPE}$ | $\Delta G$ |
|--------------------------------|------------|-------------------------|------------|------------|-------------------------|------------|
|                                | BS1        | BS1                     | BS1        | BS2        | BS2                     | BS2        |
| ${}^5\text{Re}_{1F}$           | 0.00       | 0.00                    | 0.00       | 0.00       | 0.00                    | 0.00       |
| ${}^3\text{Re}_{1F}$           | 7.16       | 8.94                    | 9.16       | -          | -                       | -          |
| ${}^5\text{TS}_{F,1F}$         | 17.04      | 16.45                   | 18.35      | 3.58       | 2.98                    | 4.88       |
| ${}^5\text{Pr}_{F,1F}$         | 1.29       | 1.26                    | -1.23      | -19.62     | -19.65                  | -22.14     |
| ${}^5\text{TS}_{\text{OH},1F}$ | 31.61      | 31.95                   | 33.71      | 14.56      | 14.90                   | 16.66      |
| ${}^5\text{Pr}_{\text{OH},1F}$ | -19.39     | -17.04                  | -16.53     | -38.02     | -35.67                  | -35.16     |

**Table S9.** Group spin densities of UB3LYP/BS1+solvent optimized geometries for the reaction pathway of  $[\text{Fe}^{\text{III}}(\text{BNPA}^{\text{Ph}_2\text{O}})(\text{OH})(\text{F})]$  ( $\mathbf{1}_F$ ) with the radical substrate ( $p\text{-Cl-C}_6\text{H}_4$ ) $_3\text{C}\cdot$  as obtained in Gaussian-09 in the quintet spin state.

|                                | $\rho_{\text{Fe}}$ | $\rho_{\text{ligand}}$ | $\rho_{\text{OH}}$ | $\rho_{\text{F}}$ | $\rho_{\text{Trityl}}$ |
|--------------------------------|--------------------|------------------------|--------------------|-------------------|------------------------|
| ${}^5\text{Re}_{1F}$           | 4.06               | 0.59                   | 0.17               | 0.18              | -1.00                  |
| ${}^5\text{TS}_{F,1F}$         | 3.86               | 0.33                   | 0.09               | 0.07              | -0.35                  |
| ${}^5\text{Pr}_{F,1F}$         | 3.70               | 0.24                   | 0.06               | 0.00              | 0.00                   |
| ${}^5\text{TS}_{\text{OH},1F}$ | 3.87               | 0.31                   | 0.12               | 0.10              | -0.40                  |
| ${}^5\text{Pr}_{\text{OH},1F}$ | 3.71               | 0.23                   | 0.00               | 0.06              | 0.00                   |

**Table S10.** Absolute energies, zero-point energies and free energies (in a.u.) of optimized geometries for the reaction of  $[\text{Fe}^{\text{III}}(\text{BNPA}^{\text{Ph}_2\text{O}})(\text{Cl})_2]$  ( $\mathbf{2}_{\text{Cl}}$ ) with the radical substrate  $(p\text{-Cl-C}_6\text{H}_4)_3\text{C}\cdot$  as obtained in Gaussian-09 in the quintet spin state. All calculations were done with a continuum polarized conductor model (CPCM) included with the solvent THF that has a dielectric constant of 7.6.

|                                                                            | E [au]       | ZPE [au]  | G [au]       | $E_{\text{solv}}$ [au] |
|----------------------------------------------------------------------------|--------------|-----------|--------------|------------------------|
|                                                                            | B3LYP/BS1    | B3LYP/BS1 | B3LYP/BS1    | B3LYP/BS2              |
| $[\text{Fe}^{\text{III}}(\text{BNPA}^{\text{Ph}_2\text{O}})(\text{Cl})_2]$ | -2792.103183 | 0.773089  | -2791.410716 | -2787.857975           |
| $(p\text{-Cl-C}_6\text{H}_4)_3\text{C}\cdot$                               | -2111.594199 | 0.251930  | -2111.391251 | -2112.063601           |
| ${}^5\text{Re}_{2\text{Cl}}$                                               | -4903.713585 | 1.024756  | -4902.805019 | -4899.966105           |
| ${}^5\text{TS}_{\text{Cl}_2,2\text{Cl}}$                                   | -4903.707111 | 1.024493  | -4902.794971 | -4899.954113           |
| ${}^5\text{Pr}_{\text{Cl}_2,2\text{Cl}}$                                   | -4903.714399 | 1.024648  | -4902.805605 | -4899.958965           |
| ${}^5\text{TS}_{\text{Cl}_3,2\text{Cl}}$                                   | -4903.687458 | 1.023891  | -4902.771050 | -4899.937154           |
| ${}^5\text{Pr}_{\text{Cl}_3,2\text{Cl}}$                                   | -4903.714994 | 1.025256  | -4902.804005 | -4899.958046           |

**Table S11.** Relative energies, zero-point energies and free energies (in kcal mol<sup>-1</sup>) of optimized geometries for the reaction of  $[\text{Fe}^{\text{III}}(\text{BNPA}^{\text{Ph}_2\text{O}})(\text{Cl})_2]$  ( $\mathbf{2}_{\text{Cl}}$ ) with the radical substrate  $(p\text{-Cl-C}_6\text{H}_4)_3\text{C}\cdot$  as obtained in Gaussian-09 in the quintet spin state.

|                                          | $\Delta E$ | $\Delta E + \text{ZPE}$ | $\Delta G$ | $\Delta E$ | $\Delta E + \text{ZPE}$ | $\Delta G$ |
|------------------------------------------|------------|-------------------------|------------|------------|-------------------------|------------|
|                                          | BS1        | BS1                     | BS1        | BS2        | BS2                     | BS2        |
| ${}^5\text{Re}_{2\text{Cl}}$             | 0.00       | 0.00                    | 0.00       | 0.00       | 0.00                    | 0.00       |
| ${}^5\text{TS}_{\text{Cl}_2,2\text{Cl}}$ | 4.06       | 3.90                    | 6.31       | 7.53       | 7.36                    | 9.77       |
| ${}^5\text{Pr}_{\text{Cl}_2,2\text{Cl}}$ | -0.51      | -0.58                   | -0.37      | 4.48       | 4.41                    | 4.62       |
| ${}^5\text{TS}_{\text{Cl}_3,2\text{Cl}}$ | 16.39      | 15.85                   | 21.32      | 18.17      | 17.62                   | 23.09      |
| ${}^5\text{Pr}_{\text{Cl}_3,2\text{Cl}}$ | -0.88      | -0.57                   | 0.64       | 5.06       | 5.37                    | 6.58       |

**Table S12.** Absolute energies, zero-point energies and free energies (in a.u.) of optimized geometries for the reaction of  $[\text{Fe}^{\text{III}}(\text{BNPA}^{\text{Ph}_2\text{O}})(\text{Cl})(\text{OH})]$  ( $2_{\text{OH}}$ ) isomer with the radical substrate ( $p\text{-Cl-C}_6\text{H}_4$ ) $_3\text{C}\cdot$  as obtained in Gaussian-09 in the quintet spin state. All calculations were done with a continuum polarized conductor model (CPCM) included with the solvent THF that has a dielectric constant of 7.6.

|                                                                            | E [au]       | ZPE [au]  | G [au]       | $E_{\text{solv}}$ [au] |
|----------------------------------------------------------------------------|--------------|-----------|--------------|------------------------|
|                                                                            | B3LYP/BS1    | B3LYP/BS1 | B3LYP/BS1    | B3LYP/BS2              |
| $[\text{Fe}^{\text{III}}(\text{BNPA}^{\text{Ph}_2\text{O}})(\text{Cl})_2]$ | -2407.685600 | 0.783964  | -2406.982874 | -2403.424345           |
| $(p\text{-Cl-C}_6\text{H}_4)_3\text{C}\cdot$                               | -2111.594199 | 0.251930  | -2111.391251 | -2112.063601           |
| $^5\text{Re}_{2\text{OH}}$                                                 | -4519.296285 | 1.036547  | -4518.372435 | -4515.532779           |
| $^5\text{TS}_{\text{Cl},2\text{OH}}$                                       | -4519.247782 | 1.035133  | -4518.321116 | -4515.499687           |
| $^5\text{Pr}_{\text{Cl},2\text{OH}}$                                       | -4519.297923 | 1.036587  | -4518.373219 | -4515.533885           |
| $^5\text{TS}_{\text{OH},2\text{OH}}$                                       | -4519.275833 | 1.035731  | -4518.348815 | -4515.512957           |
| $^5\text{Pr}_{\text{OH},2\text{OH}}$                                       | -4519.331956 | 1.039224  | -4518.403987 | -4515.581839           |

**Table S13.** Relative energies, zero-point energies and free energies (in kcal mol $^{-1}$ ) of optimized geometries for the reaction of  $[\text{Fe}^{\text{III}}(\text{BNPA}^{\text{Ph}_2\text{O}})(\text{Cl})(\text{OH})]$  ( $2_{\text{OH}}$ ) isomer with the radical substrate ( $p\text{-Cl-C}_6\text{H}_4$ ) $_3\text{C}\cdot$  as obtained in Gaussian-09 in the quintet spin state.

|                                      | $\Delta E$ | $\Delta E + \text{ZPE}$ | $\Delta G$ | $\Delta E$ | $\Delta E + \text{ZPE}$ | $\Delta G$ |
|--------------------------------------|------------|-------------------------|------------|------------|-------------------------|------------|
|                                      | BS1        | BS1                     | BS1        | BS2        | BS2                     | BS2        |
| $^5\text{Re}_{2\text{OH}}$           | 0.00       | 0.00                    | 0.00       | 0.00       | 0.00                    | 0.00       |
| $^5\text{TS}_{\text{Cl},2\text{OH}}$ | 30.44      | 29.55                   | 32.20      | 20.77      | 19.88                   | 22.53      |
| $^5\text{Pr}_{\text{Cl},2\text{OH}}$ | -1.03      | -1.00                   | -0.49      | -0.69      | -0.67                   | -0.16      |
| $^5\text{TS}_{\text{OH},2\text{OH}}$ | 12.83      | 12.32                   | 14.82      | 12.44      | 11.93                   | 14.43      |
| $^5\text{Pr}_{\text{OH},2\text{OH}}$ | -22.38     | -20.70                  | -19.80     | -30.79     | -29.11                  | -28.20     |

## Secondary-coordination sphere tests

**Table S14.** Absolute energies, zero-point energies and free energies (in a.u.) of optimized geometries for the reaction of  $[\text{Fe}^{\text{III}}(\text{neither})(\text{OH})(\text{Cl})]$  ( $\mathbf{1}_{\text{Cl,neither}}$ ) with the radical substrate  $(p\text{-Cl-C}_6\text{H}_4)_3\text{C}\bullet$  as obtained in Gaussian-09 in the quintet spin state. All calculations were done with a continuum polarized conductor model (CPCM) included with the solvent THF that has a dielectric constant of 7.6.

|                                                                  | E [au]       | ZPE [au]  | G [au]       | $E_{\text{solv}}$ [au] |
|------------------------------------------------------------------|--------------|-----------|--------------|------------------------|
|                                                                  | B3LYP/BS1    | B3LYP/BS1 | B3LYP/BS1    | B3LYP/BS2              |
| $[\text{Fe}^{\text{III}}(\text{neither})(\text{OH})(\text{Cl})]$ | -1903.963365 | 0.464642  | -1903.561416 | -1899.436598           |
| $(p\text{-Cl-C}_6\text{H}_4)_3\text{C}\bullet$                   | -2111.594199 | 0.25193   | -2111.391251 | -2112.063601           |
| ${}^5\text{Re}_{\text{Cl,1Cl,NE}}$                               | -4015.571261 | 0.716681  | -4014.950486 | -4011.5491934          |
| ${}^5\text{TS}_{\text{Cl,1Cl,NE}}$                               | -4015.536506 | 0.716283  | -4014.912953 | -4011.533447           |
| ${}^5\text{Pr}_{\text{Cl,1Cl,NE}}$                               | -4015.546410 | 0.717103  | -4014.924517 | -4011.5471936          |
| ${}^5\text{TS}_{\text{OH,1Cl,NE}}$                               | -4015.550818 | 0.717643  | -4014.92297  | -4011.5393864          |
| ${}^5\text{Pr}_{\text{OH,1Cl,NE}}$                               | -4015.604067 | 0.720026  | -4014.978789 | -4011.6104239          |

**Table S15.** Relative energies, zero-point energies and free energies (in kcal mol<sup>-1</sup>) of optimized geometries for the reaction of  $[\text{Fe}^{\text{III}}(\text{neither})(\text{OH})(\text{Cl})]$  ( $\mathbf{1}_{\text{Cl,neither}}$ ) with the radical substrate  $(p\text{-Cl-C}_6\text{H}_4)_3\text{C}\bullet$  as obtained in Gaussian-09 in the quintet spin state.

|                                    | $\Delta E$ | $\Delta E + \text{ZPE}$ | $\Delta G$ | $\Delta E$ | $\Delta E + \text{ZPE}$ | $\Delta G$ |
|------------------------------------|------------|-------------------------|------------|------------|-------------------------|------------|
|                                    | BS1        | BS1                     | BS1        | BS2        | BS2                     | BS2        |
| ${}^5\text{Re}_{\text{Cl,1Cl,NE}}$ | 0.00       | 0.00                    | 0.00       | 0.00       | 0.00                    | 0.00       |
| ${}^5\text{TS}_{\text{Cl,1Cl,NE}}$ | 21.81      | 21.56                   | 23.55      | 9.88       | 9.63                    | 11.62      |
| ${}^5\text{Pr}_{\text{Cl,1Cl,NE}}$ | 15.59      | 15.86                   | 16.30      | 1.25       | 1.52                    | 1.96       |
| ${}^5\text{TS}_{\text{OH,1Cl,NE}}$ | 12.83      | 13.43                   | 17.27      | 6.15       | 6.76                    | 10.59      |
| ${}^5\text{Pr}_{\text{OH,1Cl,NE}}$ | -20.59     | -18.49                  | -17.76     | -38.42     | -36.32                  | -35.60     |



**Table S16.** Absolute energies, zero-point energies and free energies (in a.u.) of optimized geometries for the reaction of [Fe<sup>III</sup>(noH)(OH)(Cl)] (**1**<sub>Cl,noH</sub>) with the radical substrate (*p*-Cl-C<sub>6</sub>H<sub>4</sub>)<sub>3</sub>C• as obtained in Gaussian-09 in the quintet spin state. All calculations were done with a continuum polarized conductor model (CPCM) included with the solvent THF that has a dielectric constant of 7.6.

|                                                                 | E [au]       | ZPE [au]  | G [au]       | E <sub>solv</sub> [au] |
|-----------------------------------------------------------------|--------------|-----------|--------------|------------------------|
|                                                                 | B3LYP/BS1    | B3LYP/BS1 | B3LYP/BS1    | B3LYP/BS2              |
| [Fe <sup>III</sup> (noH)(OH)(Cl)]                               | -2375.606417 | 0.806662  | -2374.880938 | -2371.301371           |
| ( <i>p</i> -Cl-C <sub>6</sub> H <sub>4</sub> ) <sub>3</sub> -C• | -2111.594199 | 0.251930  | -2111.391251 | -2112.063601           |
| <sup>5</sup> Re <sub>1Cl,NH</sub>                               | -4487.214416 | 1.058884  | -4486.268432 | -4483.4131793          |
| <sup>5</sup> TS <sub>Cl,1Cl,NH</sub>                            | -4487.189896 | 1.057917  | -4486.245446 | -4483.39989            |
| <sup>5</sup> Pr <sub>Cl,1Cl,NH</sub>                            | -4487.190566 | 1.058011  | -4486.249744 | -4483.4045611          |
| <sup>5</sup> TS <sub>OH,1Cl,NH</sub>                            | -4487.185154 | 1.058882  | -4486.233926 | -4483.3899695          |
| <sup>5</sup> Pr <sub>OH,1Cl,NH</sub>                            | -4487.242978 | 1.061592  | -4486.296148 | -4483.4653703          |

**Table S17.** Relative energies, zero-point energies and free energies (in kcal mol<sup>-1</sup>) of optimized geometries for the reaction of [Fe<sup>III</sup>(noH)(OH)(Cl)] (**1**<sub>Cl,noH</sub>) with the radical substrate (*p*-Cl-C<sub>6</sub>H<sub>4</sub>)<sub>3</sub>C• as obtained in Gaussian-09 in the quintet spin state.

|                                      | ΔE     | ΔE+ZPE | ΔG     | ΔE     | ΔE+ZPE | ΔG     |
|--------------------------------------|--------|--------|--------|--------|--------|--------|
|                                      | BS1    | BS1    | BS1    | BS2    | BS2    | BS2    |
| <sup>5</sup> Re <sub>1Cl,NH</sub>    | 0.00   | 0.00   | 0.00   | 0.00   | 0.00   | 0.00   |
| <sup>5</sup> TS <sub>Cl,1Cl,NH</sub> | 15.39  | 14.78  | 14.42  | 8.34   | 7.73   | 7.38   |
| <sup>5</sup> Pr <sub>Cl,1Cl,NH</sub> | 14.97  | 14.42  | 11.73  | 5.41   | 4.86   | 2.17   |
| <sup>5</sup> TS <sub>OH,1Cl,NH</sub> | 18.36  | 18.36  | 21.65  | 14.56  | 14.56  | 17.86  |
| <sup>5</sup> Pr <sub>OH,1Cl,NH</sub> | -17.92 | -16.22 | -17.39 | -32.75 | -31.05 | -32.22 |

**Table S18** Absolute energies, zero-point energies and free energies (in a.u.) of optimized geometries for the reaction of [Fe<sup>III</sup>(nosterics)(OH)(Cl)] (**1**<sub>Cl,nosterics</sub>) with the radical substrate (*p*-Cl-C<sub>6</sub>H<sub>4</sub>)<sub>3</sub>-C• as obtained in Gaussian-09 in the quintet spin state. All calculations were done with a continuum polarized conductor model (CPCM) included with the solvent THF that has a dielectric constant of 7.6.

|                                                                 | E [au]       | ZPE [au]  | G [au]       | E <sub>solv</sub> [au] |
|-----------------------------------------------------------------|--------------|-----------|--------------|------------------------|
|                                                                 | B3LYP/BS1    | B3LYP/BS1 | B3LYP/BS1    | B3LYP/BS2              |
| [Fe <sup>III</sup> (nosterics)(OH)(Cl)]                         | -2014.683145 | 0.500205  | -2014.245673 | -2010.220686           |
| ( <i>p</i> -Cl-C <sub>6</sub> H <sub>4</sub> ) <sub>3</sub> -C• | -2111.594199 | 0.251930  | -2111.391251 | -2112.063601           |
| <sup>5</sup> Re <sub>1Cl,NS</sub>                               | -4126.290939 | 0.752327  | -4125.633914 | -4122.340524           |
| <sup>5</sup> TS <sub>Cl,1Cl,NS</sub>                            | -4126.265020 | 0.750943  | -4125.610670 | -4122.324083           |
| <sup>5</sup> Pr <sub>Cl,1Cl,NS</sub>                            | -4126.271820 | 0.752098  | -4125.615676 | -4122.333430           |
| <sup>5</sup> TS <sub>OH,1Cl,NS</sub>                            | -4126.258958 | 0.752482  | -4125.598453 | -4122.318799           |
| <sup>5</sup> Pr <sub>OH,1Cl,NS</sub>                            | -4126.308904 | 0.754557  | -4125.649164 | -4122.378707           |

**Table S19.** Relative energies, zero-point energies and free energies (in kcal mol<sup>-1</sup>) of optimized geometries for the reaction of [Fe<sup>III</sup>(nosterics)(OH)(Cl)] (**1**<sub>Cl,nosterics</sub>) with the radical substrate (*p*-Cl-C<sub>6</sub>H<sub>4</sub>)<sub>3</sub>-C• as obtained in Gaussian-09 in the quintet spin state.

|                                      | ΔE     | ΔE+ZPE | ΔG    | ΔE     | ΔE+ZPE | ΔG     |
|--------------------------------------|--------|--------|-------|--------|--------|--------|
|                                      | BS1    | BS1    | BS1   | BS2    | BS2    | BS2    |
| <sup>5</sup> Re <sub>1Cl,NS</sub>    | 0.00   | 0.00   | 0.00  | 0.00   | 0.00   | 0.00   |
| <sup>5</sup> TS <sub>Cl,1Cl,NS</sub> | 16.26  | 15.40  | 14.59 | 10.32  | 9.45   | 8.64   |
| <sup>5</sup> Pr <sub>Cl,1Cl,NS</sub> | 12.00  | 11.85  | 11.44 | 4.45   | 4.31   | 3.90   |
| <sup>5</sup> TS <sub>OH,1Cl,NS</sub> | 20.07  | 20.17  | 22.25 | 13.63  | 13.73  | 15.82  |
| <sup>5</sup> Pr <sub>OH,1Cl,NS</sub> | -11.27 | -9.87  | -9.57 | -23.96 | -22.56 | -22.26 |

## Data with phenylmethylmethyl as substrate

**Table S20.** Absolute energies, zero-point energies and free energies (in a.u.) of optimized geometries for the reaction of  $[\text{Fe}^{\text{III}}(\text{BNPA}^{\text{Ph}_2\text{O}})(\text{OH})(\text{Cl})]$  ( $\mathbf{1}_{\text{Cl}}$ ) with the radical substrate phenylmethylmethyl radical• as obtained in Gaussian-09 in the quintet spin state. All calculations were done with a continuum polarized conductor model (CPCM) included with the solvent THF that has a dielectric constant of 7.6.

|                                                                                     | E [au]       | ZPE [au]  | G [au]       | $E_{\text{solv}}$ [au] |
|-------------------------------------------------------------------------------------|--------------|-----------|--------------|------------------------|
|                                                                                     | B3LYP/BS1    | B3LYP/BS1 | B3LYP/BS1    | B3LYP/BS2              |
| $[\text{Fe}^{\text{III}}(\text{BNPA}^{\text{Ph}_2\text{O}})(\text{OH})(\text{Cl})]$ | -2407.708188 | 0.78465   | -2407.003296 | -2403.445439           |
| phenylmethylmethyl•                                                                 | -310.1676298 | 0.144248  | -310.054707  | -310.3039377           |
| ${}^5\text{Re}_{\text{Cl,PM}}$                                                      | -2717.877710 | 0.930014  | -2717.040984 | -2713.780381           |
| ${}^5\text{TS}_{\text{Cl,1Cl,PM}}$                                                  | -2717.865782 | 0.928893  | -2717.032417 | -2713.770391           |
| ${}^5\text{Pr}_{\text{Cl,1Cl,PM}}$                                                  | -2717.890568 | 0.931434  | -2717.054175 | -2713.805723           |
| ${}^5\text{TS}_{\text{OH,1Cl,PM}}$                                                  | -2717.857923 | 0.930815  | -2717.018755 | -2713.761814           |
| ${}^5\text{Pr}_{\text{OH,1Cl,PM}}$                                                  | -2717.914704 | 0.933849  | -2717.078130 | -2713.843038           |

**Table S21.** Relative energies, zero-point energies and free energies (in kcal mol<sup>-1</sup>) of optimized geometries for the reaction of  $[\text{Fe}^{\text{III}}(\text{BNPA}^{\text{Ph}_2\text{O}})(\text{OH})(\text{Cl})]$  ( $\mathbf{1}_{\text{Cl}}$ ) with the radical substrate phenylmethylmethyl• as obtained in Gaussian-09 in the quintet spin state.

|                                    | $\Delta E$ | $\Delta E + \text{ZPE}$ | $\Delta G$ | $\Delta E$ | $\Delta E + \text{ZPE}$ | $\Delta G$ |
|------------------------------------|------------|-------------------------|------------|------------|-------------------------|------------|
|                                    | BS1        | BS1                     | BS1        | BS2        | BS2                     | BS2        |
| ${}^5\text{Re}_{\text{Cl,PM}}$     | 0.00       | 0.00                    | 0.00       | 0.00       | 0.00                    | 0.00       |
| ${}^5\text{TS}_{\text{Cl,1Cl,PM}}$ | 7.48       | 6.78                    | 5.38       | 6.27       | 5.57                    | 4.16       |
| ${}^5\text{Pr}_{\text{Cl,1Cl,PM}}$ | -8.07      | -7.18                   | -8.28      | -15.90     | -15.01                  | -16.11     |
| ${}^5\text{TS}_{\text{OH,1Cl,PM}}$ | 12.42      | 12.92                   | 13.95      | 11.65      | 12.15                   | 13.18      |
| ${}^5\text{Pr}_{\text{OH,1Cl,PM}}$ | -23.21     | -20.81                  | -23.31     | -39.32     | -36.91                  | -39.41     |

**Table S22.** Group spin densities of UB3LYP/BS1+solvent optimized geometries for the reaction pathway of  $[\text{Fe}^{\text{III}}(\text{BNPA}^{\text{Ph}_2\text{O}})(\text{OH})(\text{Cl})]$  ( $\mathbf{1}_{\text{Cl}}$ ) with the radical substrate phenylmethylmethyl• as obtained in Gaussian-09 in the quintet spin state.

|                                    | $\rho_{\text{Fe}}$ | $\rho_{\text{ligand}}$ | $\rho_{\text{OH}}$ | $\rho_{\text{Cl}}$ | $\rho_{\text{Sub}}$ |
|------------------------------------|--------------------|------------------------|--------------------|--------------------|---------------------|
| ${}^5\text{Re}_{\text{Cl,PM}}$     | 4.03               | 0.64                   | 0.20               | 0.12               | -1.00               |
| ${}^5\text{TS}_{\text{Cl,1Cl,PM}}$ | 3.89               | 0.39                   | 0.12               | 0.12               | -0.52               |
| ${}^5\text{Pr}_{\text{Cl,1Cl,PM}}$ | 3.71               | 0.22                   | 0.07               | 0.00               | 0.00                |
| ${}^5\text{TS}_{\text{OH,1Cl,PM}}$ | 3.87               | 0.35                   | 0.20               | 0.05               | -0.47               |
| ${}^5\text{Pr}_{\text{OH,1Cl,PM}}$ | 3.69               | 0.28                   | 0.00               | 0.03               | 0.00                |

**Table S23.** Absolute energies, zero-point energies and free energies (in a.u.) of optimized geometries for the reaction of  $[\text{Fe}^{\text{III}}(\text{BNPA}^{\text{Ph}_2\text{O}})(\text{OH})(\text{Br})]$  ( $\mathbf{1}_{\text{Br}}$ ) with the radical substrate phenylmethylmethyl• as obtained in Gaussian-09 in the quintet spin state. All calculations were done with a continuum polarized conductor model (CPCM) included with the solvent THF that has a dielectric constant of 7.6.

|                                                                                     | E [au]       | ZPE [au]  | G [au]       | $E_{\text{solv}}$ [au] |
|-------------------------------------------------------------------------------------|--------------|-----------|--------------|------------------------|
|                                                                                     | B3LYP/BS1    | B3LYP/BS1 | B3LYP/BS1    | B3LYP/BS2              |
| $[\text{Fe}^{\text{III}}(\text{BNPA}^{\text{Ph}_2\text{O}})(\text{OH})(\text{Br})]$ | -4518.908211 | 0.784449  | -4518.203936 | -4517.354653           |
| phenylmethylmethyl•                                                                 | -310.1676298 | 0.144248  | -310.0547070 | -310.3039377           |
| ${}^5\text{Re}_{\text{Br,PM}}$                                                      | -4829.077928 | 0.929624  | -4828.245953 | -4827.701023           |
| ${}^5\text{TS}_{\text{Br,1Br,PM}}$                                                  | -4829.068642 | 0.929155  | -4828.235734 | -4827.688840           |
| ${}^5\text{Pr}_{\text{Br,1Br,PM}}$                                                  | -4829.093700 | 0.930908  | -4828.257705 | -4827.727647           |
| ${}^5\text{TS}_{\text{OH,1Br,PM}}$                                                  | -4829.058735 | 0.930856  | -4828.219856 | -4827.683637           |
| ${}^5\text{Pr}_{\text{OH,1Br,PM}}$                                                  | -4829.122312 | 0.935092  | -4828.279630 | -4827.765137           |

**Table S24.** Relative energies, zero-point energies and free energies (in kcal mol<sup>-1</sup>) of optimized geometries for the reaction of  $[\text{Fe}^{\text{III}}(\text{BNPA}^{\text{Ph}_2\text{O}})(\text{OH})(\text{Br})]$  ( $\mathbf{1}_{\text{Br}}$ ) with the radical substrate phenylmethylmethyl• as obtained in Gaussian-09 in the quintet spin state.

|                                    | $\Delta E$ | $\Delta E + \text{ZPE}$ | $\Delta G$ | $\Delta E$ | $\Delta E + \text{ZPE}$ | $\Delta G$ |
|------------------------------------|------------|-------------------------|------------|------------|-------------------------|------------|
|                                    | BS1        | BS1                     | BS1        | BS2        | BS2                     | BS2        |
| ${}^5\text{Re}_{\text{Br,PM}}$     | 0.00       | 0.00                    | 0.00       | 0.00       | 0.00                    | 0.00       |
| ${}^5\text{TS}_{\text{Br,1Br,PM}}$ | 5.83       | 5.53                    | 6.41       | 7.64       | 7.35                    | 8.23       |
| ${}^5\text{Pr}_{\text{Br,1Br,PM}}$ | -9.90      | -9.09                   | -7.37      | -16.71     | -15.90                  | -14.18     |
| ${}^5\text{TS}_{\text{OH,1Br,PM}}$ | 12.04      | 12.82                   | 16.38      | 10.91      | 11.68                   | 15.24      |
| ${}^5\text{Pr}_{\text{OH,1Br,PM}}$ | -27.85     | -24.42                  | -21.13     | -40.23     | -36.80                  | -33.51     |

**Table S25.** Group spin densities of UB3LYP/BS1+solvent optimized geometries for the reaction pathway of  $[\text{Fe}^{\text{III}}(\text{BNPA}^{\text{Ph}_2\text{O}})(\text{OH})(\text{Br})]$  ( $\mathbf{1}_{\text{Br}}$ ) with the radical substrate phenylmethylmethyl• as obtained in Gaussian-09 in the quintet spin state.

|                                    | $\rho_{\text{Fe}}$ | $\rho_{\text{ligand}}$ | $\rho_{\text{OH}}$ | $\rho_{\text{Br}}$ | $\rho_{\text{Sub}}$ |
|------------------------------------|--------------------|------------------------|--------------------|--------------------|---------------------|
| ${}^5\text{Re}_{\text{Br,PM}}$     | 4.00               | 0.65                   | 0.19               | 0.15               | -1.00               |
| ${}^5\text{TS}_{\text{Br,1Br,PM}}$ | 3.88               | 0.43                   | 0.14               | 0.17               | -0.61               |
| ${}^5\text{Pr}_{\text{Br,1Br,PM}}$ | 3.71               | 0.21                   | 0.07               | 0.00               | 0.00                |
| ${}^5\text{TS}_{\text{OH,1Br,PM}}$ | 3.85               | 0.35                   | 0.20               | 0.06               | -0.46               |
| ${}^5\text{Pr}_{\text{OH,1Br,PM}}$ | 3.70               | 0.25                   | 0.00               | 0.05               | 0.00                |

## Data with diphenylmethyl radical

**Table S26.** Absolute energies, zero-point energies and free energies (in a.u.) of optimized geometries for the reaction of  $[\text{Fe}^{\text{III}}(\text{BNPA}^{\text{Ph}_2\text{O}})(\text{OH})(\text{Cl})]$  ( $\mathbf{1}_{\text{Cl}}$ ) with the radical substrate diphenylmethyl radical• as obtained in Gaussian-09 in the quintet spin state. All calculations were done with a continuum polarized conductor model (CPCM) included with the solvent THF that has a dielectric constant of 7.6.

|                                                                                     | E [au]       | ZPE [au]  | G [au]       | $E_{\text{solv}}$ [au] |
|-------------------------------------------------------------------------------------|--------------|-----------|--------------|------------------------|
|                                                                                     | B3LYP/BS1    | B3LYP/BS1 | B3LYP/BS1    | B3LYP/BS2              |
| $[\text{Fe}^{\text{III}}(\text{BNPA}^{\text{Ph}_2\text{O}})(\text{OH})(\text{Cl})]$ | -2407.708188 | 0.78465   | -2407.003296 | -2403.445439           |
| diphenylmethyl•                                                                     | -541.1744063 | 0.227567  | -540.985552  | -541.4094898           |
| ${}^5\text{Re}_{\text{Cl,1Cl,PP}}$                                                  | -2948.883370 | 1.012475  | -2947.972891 | -2944.885173           |
| ${}^5\text{TS}_{\text{Cl,1Cl,PP}}$                                                  | -2948.868477 | 1.011967  | -2947.954991 | -2944.876594           |
| ${}^5\text{Pr}_{\text{Cl,1Cl,PP}}$                                                  | -2948.882263 | 1.013182  | -2947.969674 | -2944.894891           |
| ${}^5\text{TS}_{\text{OH,1Cl,PP}}$                                                  | -2948.858663 | 1.013377  | -2947.940965 | -2944.873106           |
| ${}^5\text{Pr}_{\text{OH,1Cl,PP}}$                                                  | -2948.914165 | 1.015683  | -2947.999095 | -2944.938452           |

**Table S27.** Relative energies, zero-point energies and free energies (in kcal mol<sup>-1</sup>) of optimized geometries for the reaction of  $[\text{Fe}^{\text{III}}(\text{BNPA}^{\text{Ph}_2\text{O}})(\text{OH})(\text{Cl})]$  ( $\mathbf{1}_{\text{Cl}}$ ) with the radical substrate diphenylmethyl radical• as obtained in Gaussian-09 in the quintet spin state.

|                                    | $\Delta E$ | $\Delta E + \text{ZPE}$ | $\Delta G$ | $\Delta E$ | $\Delta E + \text{ZPE}$ | $\Delta G$ |
|------------------------------------|------------|-------------------------|------------|------------|-------------------------|------------|
|                                    | BS1        | BS1                     | BS1        | BS2        | BS2                     | BS2        |
| ${}^5\text{Re}_{\text{Cl,1Cl,PP}}$ | 0.00       | 0.00                    | 0.00       | 0.00       | 0.00                    | 0.00       |
| ${}^5\text{TS}_{\text{Cl,1Cl,PP}}$ | 9.35       | 9.03                    | 11.23      | 5.38       | 5.06                    | 7.27       |
| ${}^5\text{Pr}_{\text{Cl,1Cl,PP}}$ | 0.69       | 1.14                    | 2.02       | -6.10      | -5.65                   | -4.77      |
| ${}^5\text{TS}_{\text{OH,1Cl,PP}}$ | 15.50      | 16.07                   | 20.03      | 7.57       | 8.14                    | 12.10      |
| ${}^5\text{Pr}_{\text{OH,1Cl,PP}}$ | -19.32     | -17.31                  | -16.44     | -33.43     | -31.42                  | -30.55     |

**Table S28.** Group spin densities of UB3LYP/BS1+solvent optimized geometries for the reaction pathway of  $[\text{Fe}^{\text{III}}(\text{BNPA}^{\text{Ph}_2\text{O}})(\text{OH})(\text{Cl})]$  ( $\mathbf{1}_{\text{Cl}}$ ) with the radical substrate diphenylmethyl radical • as obtained in Gaussian-09 in the quintet spin state.

|                                    | $\rho_{\text{Fe}}$ | $\rho_{\text{ligand}}$ | $\rho_{\text{OH}}$ | $\rho_{\text{Cl}}$ | $\rho_{\text{Sub}}$ |
|------------------------------------|--------------------|------------------------|--------------------|--------------------|---------------------|
| ${}^5\text{Re}_{\text{Cl,1Cl,PP}}$ | 4.02               | 0.66                   | 0.19               | 0.12               | -1.00               |
| ${}^5\text{TS}_{\text{Cl,1Cl,PP}}$ | 3.81               | 0.30                   | 0.09               | 0.08               | -0.28               |
| ${}^5\text{Pr}_{\text{Cl,1Cl,PP}}$ | 3.70               | 0.23                   | 0.07               | 0.00               | 0.00                |
| ${}^5\text{TS}_{\text{OH,1Cl,PP}}$ | 3.83               | 0.32                   | 0.16               | 0.05               | -0.36               |
| ${}^5\text{Pr}_{\text{OH,1Cl,PP}}$ | 3.67               | 0.29                   | 0.00               | 0.04               | 0.00                |

**Table S29.** Absolute energies, zero-point energies and free energies (in a.u.) of optimized geometries for the reaction of  $[\text{Fe}^{\text{III}}(\text{BNPA}^{\text{Ph}_2\text{O}})(\text{OH})(\text{Br})]$  ( $\mathbf{1}_{\text{Br}}$ ) with the radical substrate diphenylmethyl radical • as obtained in Gaussian-09 in the quintet spin state. All calculations were done with a continuum polarized conductor model (CPCM) included with the solvent THF that has a dielectric constant of 7.6.

|                                                                                     | E [au]       | ZPE [au]  | G [au]       | E <sub>solv</sub> [au] |
|-------------------------------------------------------------------------------------|--------------|-----------|--------------|------------------------|
|                                                                                     | B3LYP/BS1    | B3LYP/BS1 | B3LYP/BS1    | B3LYP/BS2              |
| $[\text{Fe}^{\text{III}}(\text{BNPA}^{\text{Ph}_2\text{O}})(\text{OH})(\text{Br})]$ | -4518.908211 | 0.784449  | -4518.203936 | -4517.354653           |
| diphenylmethyl•                                                                     | -541.1744063 | 0.227567  | -540.985552  | -541.4094898           |
| ${}^5\text{Re}_{\text{Br,PP}}$                                                      | -5060.084622 | 1.012372  | -5059.176127 | -5058.805782           |
| ${}^5\text{TS}_{\text{Br,1Br,PP}}$                                                  | -5060.071323 | 1.011613  | -5059.159232 | -5058.798028           |
| ${}^5\text{Pr}_{\text{Br,1Br,PP}}$                                                  | -5060.083678 | 1.012471  | -5059.174344 | -5058.815652           |
| ${}^5\text{TS}_{\text{OH,1Br,PP}}$                                                  | -5060.060239 | 1.012929  | -5059.142741 | -5058.786353           |
| ${}^5\text{Pr}_{\text{OH,1Br,PP}}$                                                  | -5060.114856 | 1.015434  | -5059.201400 | -5058.858336           |

**Table S30.** Relative energies, zero-point energies and free energies (in kcal mol<sup>-1</sup>) of optimized geometries for the reaction of  $[\text{Fe}^{\text{III}}(\text{BNPA}^{\text{Ph}_2\text{O}})(\text{OH})(\text{Br})]$  ( $\mathbf{1}_{\text{Br}}$ ) with the radical substrate diphenyl methyl radical • as obtained in Gaussian-09 in the quintet spin state.

|                                    | $\Delta E$ | $\Delta E + \text{ZPE}$ | $\Delta G$ | $\Delta E$ | $\Delta E + \text{ZPE}$ | $\Delta G$ |
|------------------------------------|------------|-------------------------|------------|------------|-------------------------|------------|
|                                    | BS1        | BS1                     | BS1        | BS2        | BS2                     | BS2        |
| ${}^5\text{Re}_{\text{Br,PP}}$     | 0.00       | 0.00                    | 0.00       | 0.00       | 0.00                    | 0.00       |
| ${}^5\text{TS}_{\text{Br,1Br,PP}}$ | 8.35       | 7.87                    | 10.60      | 4.87       | 4.39                    | 7.12       |
| ${}^5\text{Pr}_{\text{Br,1Br,PP}}$ | 0.59       | 0.65                    | 1.12       | -6.19      | -6.13                   | -5.67      |
| ${}^5\text{TS}_{\text{OH,1Br,PP}}$ | 15.30      | 15.65                   | 20.95      | 12.19      | 12.54                   | 17.84      |
| ${}^5\text{Pr}_{\text{OH,1Br,PP}}$ | -18.97     | -17.05                  | -15.86     | -32.98     | -31.06                  | -29.87     |

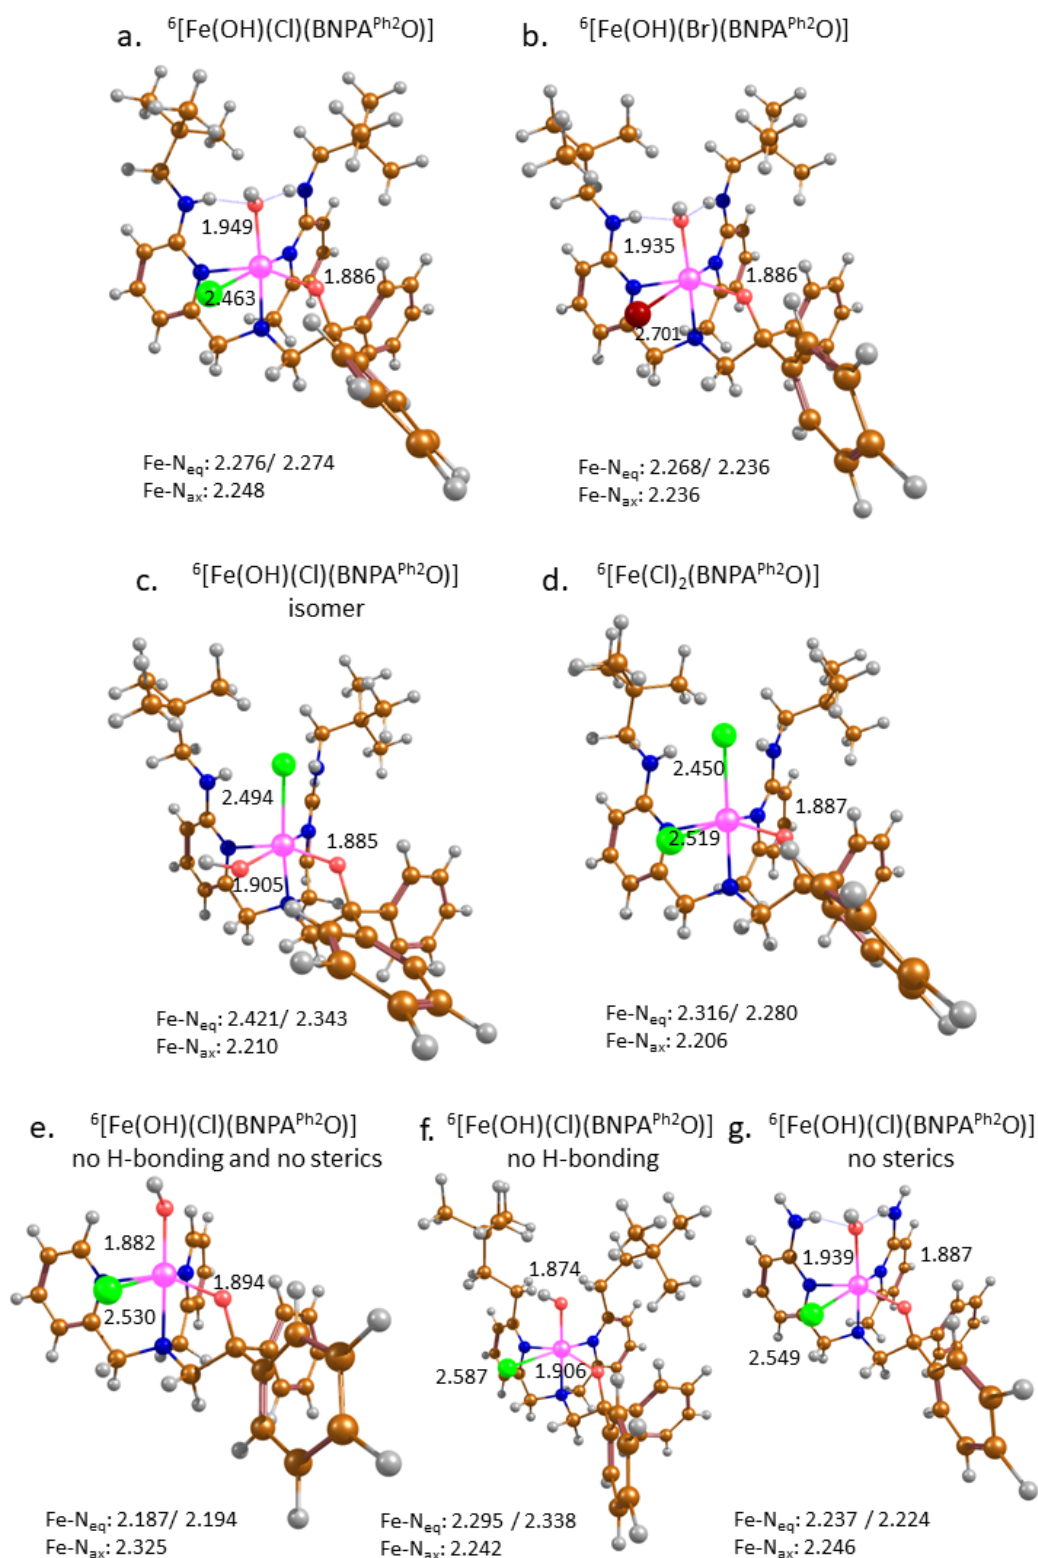

**Figure S1.** Optimized geometries of (a)  ${}^6[\text{Fe}(\text{OH})(\text{Cl})(\text{BNPA}^{\text{Ph}_2\text{O}})]$ ; (b)  ${}^6[\text{Fe}(\text{OH})(\text{Br})(\text{BNPA}^{\text{Ph}_2\text{O}})]$ ; (c)  ${}^6[\text{Fe}(\text{OH})(\text{Cl})(\text{BNPA}^{\text{Ph}_2\text{O}})]$  isomer; (d)  ${}^6[\text{Fe}(\text{Cl})_2(\text{BNPA}^{\text{Ph}_2\text{O}})]$ ; (e)  ${}^6[\text{Fe}(\text{OH})(\text{Cl})(\text{BNPA}^{\text{Ph}_2\text{O}})]$  no H-bonding and no sterics; (f)  ${}^6[\text{Fe}(\text{OH})(\text{Cl})(\text{BNPA}^{\text{Ph}_2\text{O}})]$  no H-bonding; (g)  ${}^6[\text{Fe}(\text{OH})(\text{Cl})(\text{BNPA}^{\text{Ph}_2\text{O}})]$  no sterics, as obtained at UB3LYP/BS1 in Gaussian-09. Bond lengths are in angstroms.

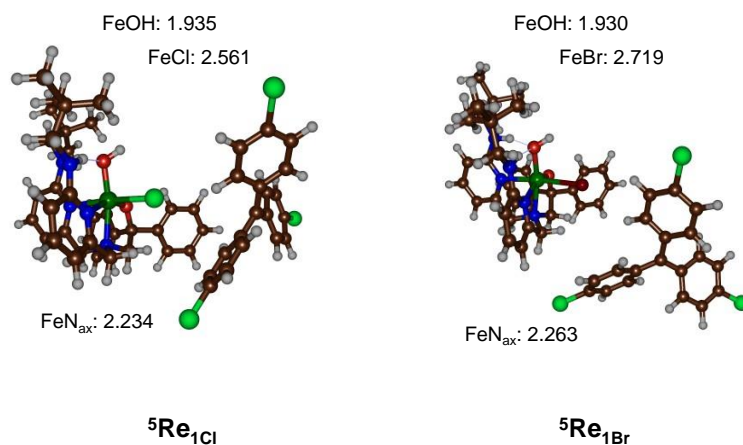

**Figure S2.** Optimized geometries of  ${}^5\text{Re}_{1\text{Cl}}$  and  ${}^5\text{Re}_{1\text{Br}}$  as obtained at UB3LYP/BS1 in Gaussian-09. Bond lengths are in angstroms.

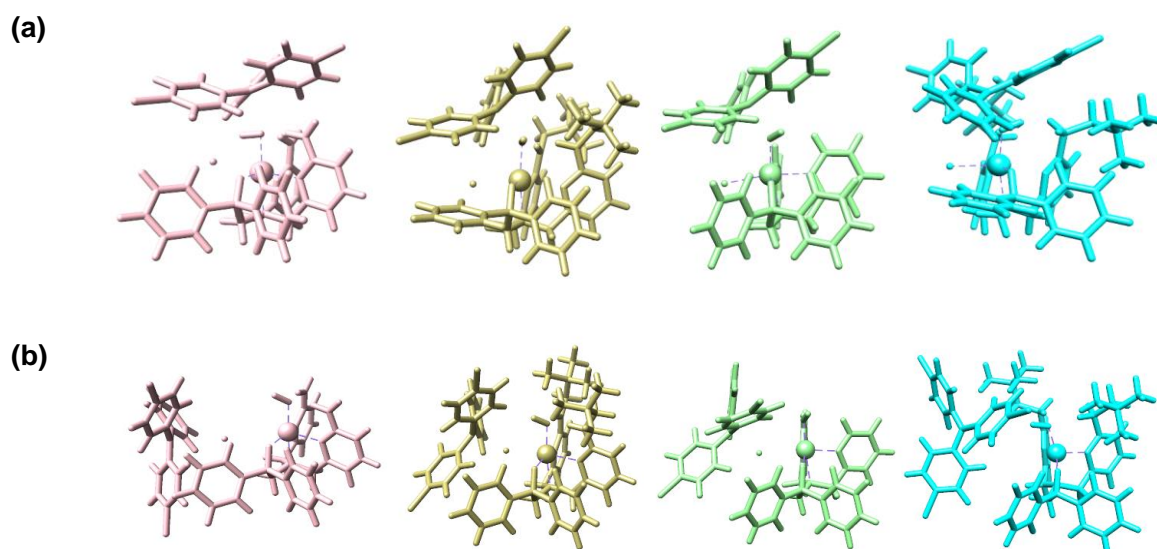

**Figure S3.** OH (part a) and Cl (part b) rebound barriers from  ${}^5\text{Re}_{1\text{Cl}}$  and truncated models with steric or hydrogen bonding interactions (or both) removed. Color coding: full system (khaki), without sterics (pink), without H-bond (cyan) and without sterics/H-bond (light green).



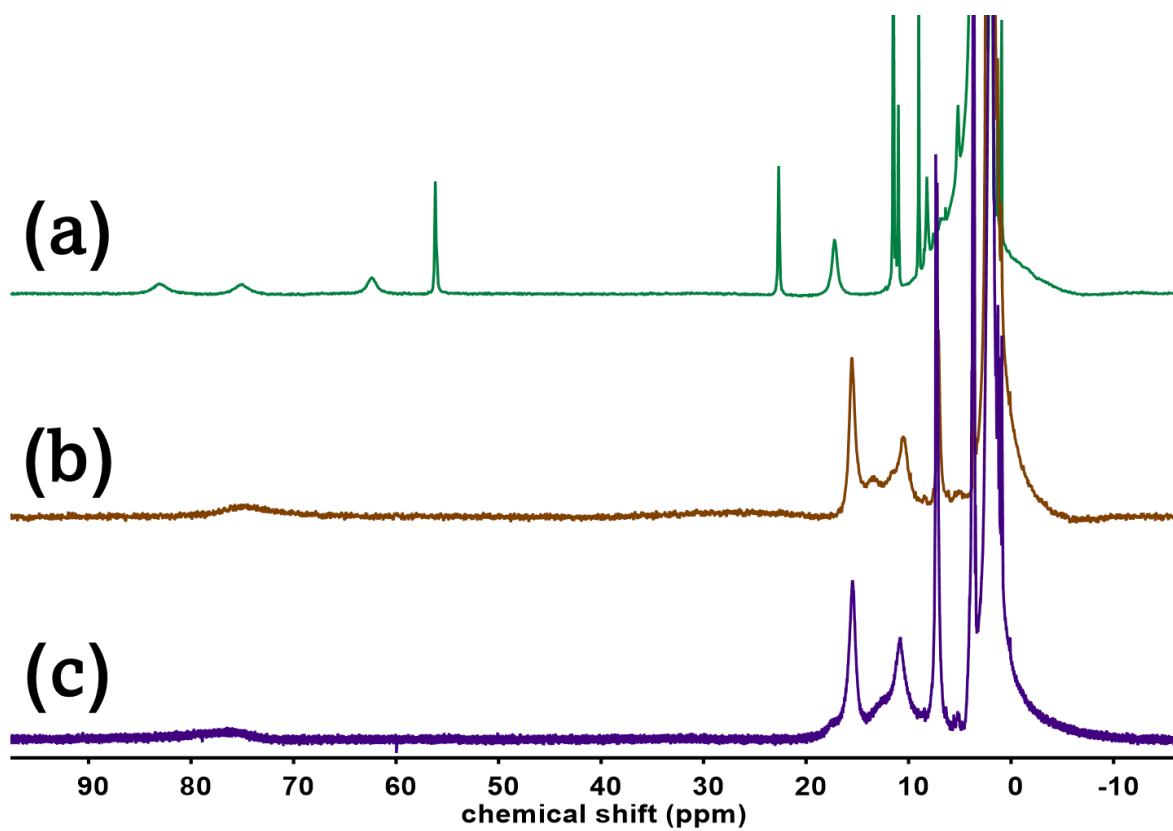

**Figure S4.** <sup>1</sup>H NMR spectra (CD<sub>3</sub>CN) of (a) pure Fe<sup>II</sup>(BNPA<sup>Ph2</sup>O)(OH), (b) Fe<sup>II</sup>(BNPA<sup>Ph2</sup>O)(OH) + 10 equiv of (*p*-Cl-C<sub>6</sub>H<sub>4</sub>)<sub>3</sub>C-Br in THF at 23 °C and (c) pure Fe<sup>III</sup>(BNPA<sup>Ph2</sup>O)(OH)(Br).

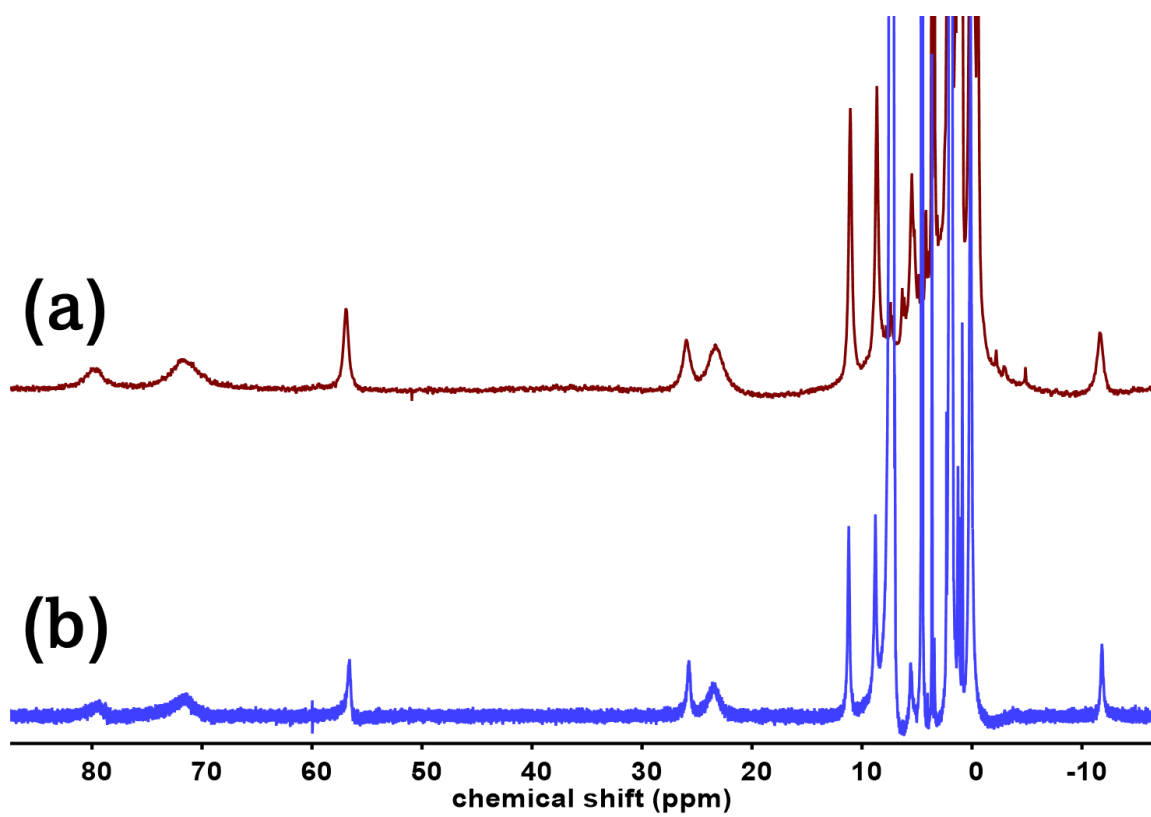

**Figure S5.** <sup>1</sup>H NMR spectra (CD<sub>3</sub>CN) of (a) pure Fe<sup>II</sup>(BNPA<sup>Ph2O</sup>)(Br) and (b) Fe<sup>II</sup>(BNPA<sup>Ph2O</sup>)(Br) + 10 equiv of (*p*-Cl-C<sub>6</sub>H<sub>4</sub>)<sub>3</sub>C-OH in THF at 23 °C.

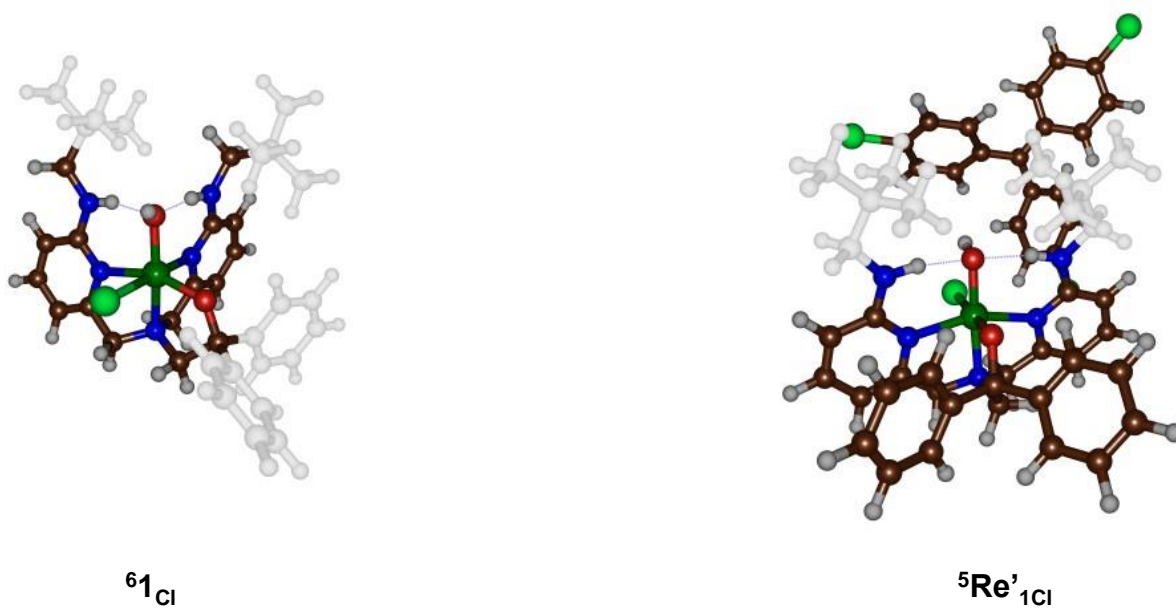

**Figure S6.** Optimized geometry of  ${}^6\mathbf{1}_{\text{Cl}}$  and the isomeric reactant complex with the equatorial ligand positions swapped.

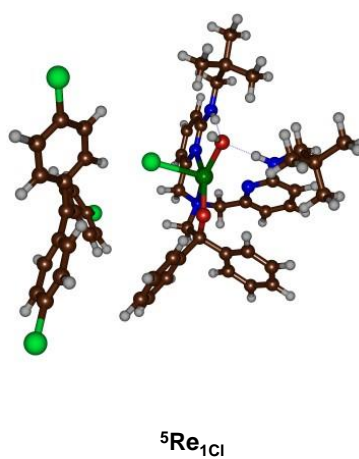

**Figure S7.** UB3LYP/BS2 optimized geometry of  ${}^5\text{Re}_{1\text{Cl}}$ .

## Cartesian coordinates of optimized geometries.

### (*p*-Cl-C<sub>6</sub>H<sub>4</sub>)<sub>3</sub>CCl:

|    |              |              |              |
|----|--------------|--------------|--------------|
| 17 | 8.028529000  | 0.313856000  | -1.115958000 |
| 6  | 7.498180000  | 0.081923000  | 0.861755000  |
| 6  | 7.019132000  | -1.358658000 | 0.950500000  |
| 6  | 8.786020000  | 0.360207000  | 1.620170000  |
| 6  | 6.406289000  | 1.118855000  | 1.071580000  |
| 6  | 6.619632000  | 2.465106000  | 0.710746000  |
| 6  | 5.190895000  | 0.774569000  | 1.687727000  |
| 6  | 4.206923000  | 1.741752000  | 1.934024000  |
| 6  | 4.452377000  | 3.055377000  | 1.554508000  |
| 6  | 5.647221000  | 3.437704000  | 0.944963000  |
| 1  | 5.817418000  | 4.466963000  | 0.655516000  |
| 17 | 3.170953000  | 4.325392000  | 1.863021000  |
| 1  | 3.275312000  | 1.465265000  | 2.411300000  |
| 1  | 5.001115000  | -0.245816000 | 1.993336000  |
| 1  | 7.545654000  | 2.752429000  | 0.228056000  |
| 6  | 6.060337000  | -1.852677000 | 0.042828000  |
| 6  | 7.464791000  | -2.204505000 | 1.980992000  |
| 6  | 6.976883000  | -3.512604000 | 2.103274000  |
| 6  | 6.040510000  | -3.964684000 | 1.181913000  |
| 6  | 5.569534000  | -3.154455000 | 0.149034000  |
| 1  | 4.840104000  | -3.526935000 | -0.559044000 |
| 1  | 5.706781000  | -1.221127000 | -0.762821000 |
| 1  | 8.186392000  | -1.852109000 | 2.706251000  |
| 1  | 7.326186000  | -4.154288000 | 2.902263000  |
| 17 | 5.402882000  | -5.674105000 | 1.326647000  |
| 6  | 8.809450000  | 1.248916000  | 2.708656000  |
| 6  | 9.984746000  | 1.460843000  | 3.442427000  |
| 6  | 11.134974000 | 0.775015000  | 3.073251000  |
| 6  | 11.150706000 | -0.119779000 | 2.003280000  |
| 6  | 9.972340000  | -0.324438000 | 1.285279000  |
| 1  | 7.912779000  | 1.777046000  | 3.004822000  |
| 1  | 9.990429000  | 2.146737000  | 4.280063000  |
| 17 | 12.677912000 | 1.050813000  | 4.018078000  |
| 1  | 12.058708000 | -0.643233000 | 1.731756000  |
| 1  | 9.979301000  | -1.009358000 | 0.446254000  |

### (*p*-Cl-C<sub>6</sub>H<sub>4</sub>)<sub>3</sub>CBr:

|    |              |              |              |
|----|--------------|--------------|--------------|
| 35 | 8.061607000  | 0.338955000  | -1.225673000 |
| 6  | 7.516332000  | 0.092166000  | 0.798661000  |
| 6  | 7.036876000  | -1.352516000 | 0.911255000  |
| 6  | 8.795170000  | 0.370476000  | 1.582162000  |
| 6  | 6.412993000  | 1.119180000  | 1.036811000  |
| 6  | 6.574601000  | 2.452683000  | 0.613675000  |
| 6  | 5.255102000  | 0.778630000  | 1.754778000  |
| 6  | 4.277046000  | 1.740048000  | 2.045625000  |
| 6  | 4.474468000  | 3.044655000  | 1.611010000  |
| 6  | 5.611910000  | 3.421753000  | 0.897587000  |
| 1  | 5.743614000  | 4.443156000  | 0.563328000  |
| 17 | 3.201840000  | 4.309125000  | 1.980661000  |
| 1  | 3.387056000  | 1.466184000  | 2.598122000  |
| 1  | 5.104127000  | -0.235921000 | 2.099923000  |
| 1  | 7.450425000  | 2.725588000  | 0.038564000  |
| 6  | 6.145845000  | -1.888209000 | -0.038125000 |
| 6  | 7.397536000  | -2.143887000 | 2.014337000  |
| 6  | 6.886949000  | -3.440054000 | 2.170810000  |
| 6  | 6.010178000  | -3.931698000 | 1.211760000  |
| 6  | 5.626881000  | -3.175617000 | 0.104587000  |
| 1  | 4.946330000  | -3.579496000 | -0.634422000 |
| 1  | 5.875819000  | -1.298912000 | -0.905220000 |
| 1  | 8.074292000  | -1.759057000 | 2.766376000  |
| 1  | 7.173099000  | -4.042093000 | 3.024025000  |
| 17 | 5.339120000  | -5.625224000 | 1.403312000  |
| 6  | 8.783017000  | 1.191958000  | 2.720700000  |
| 6  | 9.942110000  | 1.380797000  | 3.486855000  |
| 6  | 11.109620000 | 0.735344000  | 3.099844000  |
| 6  | 11.160308000 | -0.090485000 | 1.976858000  |
| 6  | 9.999411000  | -0.266190000 | 1.223776000  |
| 1  | 7.871714000  | 1.688842000  | 3.027118000  |
| 1  | 9.922279000  | 2.017810000  | 4.362111000  |
| 17 | 12.631387000 | 0.976832000  | 4.090009000  |
| 1  | 12.082351000 | -0.580256000 | 1.689925000  |
| 1  | 10.029982000 | -0.884572000 | 0.335320000  |

Data for 1<sub>Cl</sub>:

<sup>5</sup>Re<sub>1Cl</sub>:

|    |              |              |              |
|----|--------------|--------------|--------------|
| 26 | 6.287278000  | 12.868423000 | 3.594073000  |
| 17 | 7.688032000  | 12.306832000 | 1.524618000  |
| 8  | 5.163954000  | 11.319976000 | 3.302897000  |
| 1  | 5.581186000  | 10.523675000 | 2.924422000  |
| 6  | 4.251471000  | 8.741021000  | 5.999978000  |
| 1  | 5.098436000  | 9.335780000  | 5.639701000  |
| 1  | 3.698361000  | 8.371314000  | 5.127013000  |
| 1  | 4.650513000  | 7.873782000  | 6.539452000  |
| 6  | 2.142640000  | 8.709337000  | 7.390187000  |
| 1  | 2.498597000  | 7.833068000  | 7.944459000  |
| 1  | 1.555091000  | 8.351774000  | 6.535114000  |
| 1  | 1.474431000  | 9.277837000  | 8.049393000  |
| 6  | 4.135963000  | 10.062621000 | 8.149857000  |
| 1  | 4.959065000  | 10.719306000 | 7.847842000  |
| 1  | 4.563999000  | 9.208326000  | 8.688552000  |
| 1  | 3.495710000  | 10.613901000 | 8.849683000  |
| 6  | 3.334988000  | 9.576165000  | 6.922986000  |
| 6  | 2.748840000  | 10.785763000 | 6.130204000  |
| 1  | 2.153816000  | 10.387854000 | 5.297957000  |
| 1  | 2.056080000  | 11.338397000 | 6.771951000  |
| 6  | 4.089341000  | 12.919586000 | 6.035417000  |
| 6  | 3.525138000  | 13.484669000 | 7.212345000  |
| 1  | 2.782781000  | 12.935770000 | 7.773203000  |
| 6  | 3.950340000  | 14.726295000 | 7.649280000  |
| 1  | 3.525873000  | 15.154800000 | 8.551010000  |
| 6  | 4.939909000  | 15.419968000 | 6.937069000  |
| 1  | 5.305739000  | 16.382496000 | 7.272681000  |
| 6  | 5.455210000  | 14.837648000 | 5.782907000  |
| 6  | 6.466017000  | 15.623032000 | 4.975866000  |
| 1  | 5.919689000  | 16.398370000 | 4.426886000  |
| 1  | 7.144490000  | 16.143388000 | 5.660336000  |
| 6  | 7.260227000  | 15.542143000 | 2.655771000  |
| 1  | 7.967834000  | 15.018810000 | 2.006542000  |
| 1  | 7.585406000  | 16.585155000 | 2.757278000  |
| 6  | 5.885322000  | 15.463903000 | 2.041668000  |
| 6  | 5.352757000  | 16.510326000 | 1.300752000  |
| 1  | 5.898894000  | 17.439050000 | 1.193248000  |
| 6  | 4.089131000  | 16.327435000 | 0.709515000  |
| 1  | 3.631303000  | 17.132499000 | 0.144837000  |
| 6  | 3.425125000  | 15.121862000 | 0.847825000  |
| 1  | 2.451323000  | 14.978497000 | 0.401630000  |
| 6  | 4.028532000  | 14.065677000 | 1.591693000  |
| 6  | 2.246180000  | 12.451875000 | 0.976067000  |
| 1  | 2.284057000  | 12.868369000 | -0.039657000 |
| 1  | 1.361970000  | 12.883721000 | 1.470371000  |
| 6  | 2.044622000  | 10.918049000 | 0.847471000  |
| 6  | 0.754617000  | 10.702928000 | 0.019487000  |
| 1  | 0.554150000  | 9.632026000  | -0.099544000 |
| 1  | 0.847384000  | 11.143401000 | -0.980928000 |
| 1  | -0.113270000 | 11.156511000 | 0.514128000  |
| 6  | 1.867738000  | 10.262005000 | 2.236524000  |
| 1  | 2.775235000  | 10.350990000 | 2.841425000  |
| 1  | 1.643968000  | 9.194407000  | 2.123060000  |
| 1  | 1.037743000  | 10.725278000 | 2.784690000  |
| 6  | 3.240790000  | 10.276365000 | 0.106543000  |
| 1  | 4.174296000  | 10.400636000 | 0.665563000  |
| 1  | 3.375086000  | 10.727887000 | -0.884136000 |
| 1  | 3.070015000  | 9.201976000  | -0.030517000 |
| 6  | 8.645446000  | 14.474955000 | 4.420957000  |
| 1  | 9.138874000  | 15.334609000 | 4.888367000  |
| 1  | 9.199682000  | 14.216818000 | 3.517449000  |
| 6  | 8.647098000  | 13.204165000 | 5.329230000  |
| 6  | 8.346702000  | 13.471773000 | 6.822778000  |
| 6  | 7.672028000  | 12.485783000 | 7.563856000  |
| 1  | 7.321776000  | 11.599293000 | 7.049609000  |
| 6  | 7.447205000  | 12.646595000 | 8.934854000  |
| 1  | 6.922676000  | 11.872970000 | 9.487264000  |
| 6  | 7.894879000  | 13.798985000 | 9.594231000  |
| 1  | 7.720069000  | 13.925419000 | 10.657903000 |
| 6  | 8.572820000  | 14.784089000 | 8.868410000  |
| 1  | 8.928285000  | 15.680999000 | 9.366186000  |
| 6  | 8.800352000  | 14.619904000 | 7.495258000  |

|    |              |              |              |
|----|--------------|--------------|--------------|
| 1  | 9.339064000  | 15.398074000 | 6.965580000  |
| 6  | 10.036131000 | 12.527073000 | 5.229031000  |
| 6  | 11.211995000 | 13.235394000 | 5.537350000  |
| 1  | 11.162287000 | 14.269415000 | 5.862566000  |
| 6  | 12.463426000 | 12.614792000 | 5.445373000  |
| 1  | 13.360294000 | 13.176517000 | 5.687761000  |
| 6  | 12.558521000 | 11.273373000 | 5.050503000  |
| 1  | 13.528070000 | 10.790403000 | 4.982691000  |
| 6  | 11.391349000 | 10.562169000 | 4.746882000  |
| 1  | 11.453601000 | 9.523117000  | 4.438541000  |
| 6  | 10.139802000 | 11.185309000 | 4.833291000  |
| 1  | 9.233786000  | 10.644615000 | 4.591368000  |
| 7  | 3.741874000  | 11.696281000 | 5.559670000  |
| 1  | 4.226972000  | 11.390696000 | 4.701224000  |
| 7  | 5.038433000  | 13.628494000 | 5.319360000  |
| 7  | 7.262315000  | 14.840991000 | 3.978408000  |
| 7  | 5.233062000  | 14.280178000 | 2.223294000  |
| 7  | 3.468842000  | 12.834090000 | 1.690818000  |
| 1  | 3.987614000  | 12.135261000 | 2.241356000  |
| 8  | 7.645270000  | 12.327284000 | 4.789017000  |
| 6  | 12.294477000 | 10.855067000 | 0.131243000  |
| 6  | 13.416582000 | 10.281483000 | 0.879421000  |
| 6  | 14.609789000 | 11.017362000 | 1.102550000  |
| 6  | 15.680595000 | 10.474673000 | 1.814084000  |
| 6  | 15.564023000 | 9.180472000  | 2.319129000  |
| 6  | 14.413545000 | 8.415993000  | 2.130270000  |
| 6  | 13.351630000 | 8.966756000  | 1.411624000  |
| 1  | 14.340110000 | 7.416380000  | 2.540579000  |
| 17 | 16.966030000 | 8.461351000  | 3.256487000  |
| 1  | 16.588813000 | 11.046123000 | 1.961290000  |
| 1  | 14.706298000 | 12.016032000 | 0.693444000  |
| 1  | 12.449611000 | 8.381143000  | 1.279836000  |
| 6  | 12.011078000 | 12.290802000 | 0.216501000  |
| 6  | 12.240262000 | 13.017763000 | 1.413967000  |
| 1  | 12.607044000 | 12.502246000 | 2.293580000  |
| 6  | 11.966017000 | 14.383469000 | 1.501674000  |
| 1  | 12.132796000 | 14.916973000 | 2.429377000  |
| 6  | 11.460902000 | 15.039805000 | 0.380338000  |
| 17 | 11.099737000 | 16.835510000 | 0.488494000  |
| 6  | 11.220514000 | 14.373176000 | -0.819929000 |
| 1  | 10.837592000 | 14.905379000 | -1.682009000 |
| 6  | 11.492499000 | 13.006435000 | -0.894090000 |
| 1  | 11.321424000 | 12.489219000 | -1.830658000 |
| 6  | 11.450750000 | 9.990936000  | -0.701580000 |
| 6  | 11.995510000 | 8.882037000  | -1.399972000 |
| 6  | 11.198654000 | 8.058679000  | -2.196613000 |
| 1  | 11.633466000 | 7.225295000  | -2.734619000 |
| 1  | 13.057963000 | 8.678543000  | -1.335465000 |
| 6  | 10.058669000 | 10.232642000 | -0.836850000 |
| 1  | 9.596680000  | 11.048845000 | -0.292508000 |
| 6  | 9.251669000  | 9.410827000  | -1.625522000 |
| 1  | 8.188064000  | 9.599990000  | -1.703807000 |
| 6  | 9.836441000  | 8.337551000  | -2.295358000 |
| 17 | 8.782165000  | 7.256677000  | -3.336965000 |

<sup>5</sup>TS<sub>OH,1Cl</sub>:

|    |             |              |             |
|----|-------------|--------------|-------------|
| 26 | 7.110825000 | 11.835634000 | 3.170699000 |
| 17 | 9.057717000 | 11.872726000 | 1.229596000 |
| 8  | 6.201415000 | 10.001740000 | 2.670947000 |
| 1  | 6.451887000 | 9.468314000  | 3.456701000 |
| 6  | 4.359910000 | 8.271272000  | 6.353892000 |
| 1  | 5.230923000 | 8.922812000  | 6.220483000 |
| 1  | 4.359620000 | 7.528607000  | 5.547352000 |
| 1  | 4.480467000 | 7.737225000  | 7.304138000 |
| 6  | 1.842386000 | 8.145082000  | 6.542170000 |
| 1  | 1.912518000 | 7.613824000  | 7.498507000 |
| 1  | 1.800416000 | 7.394918000  | 5.742899000 |
| 1  | 0.897632000 | 8.703531000  | 6.535694000 |
| 6  | 3.085969000 | 10.101377000 | 7.530267000 |
| 1  | 3.926195000 | 10.797344000 | 7.437250000 |
| 1  | 3.196532000 | 9.567778000  | 8.482645000 |
| 1  | 2.159546000 | 10.686341000 | 7.580048000 |
| 6  | 3.052156000 | 9.092655000  | 6.360509000 |
| 6  | 2.862797000 | 9.816881000  | 4.988196000 |
| 1  | 2.755700000 | 9.049171000  | 4.215835000 |

|   |              |              |              |
|---|--------------|--------------|--------------|
| 1 | 1.917265000  | 10.371049000 | 5.006213000  |
| 6 | 4.088918000  | 12.023738000 | 4.873097000  |
| 6 | 3.031615000  | 12.794330000 | 5.421281000  |
| 1 | 2.061239000  | 12.349573000 | 5.590145000  |
| 6 | 3.257019000  | 14.126356000 | 5.732831000  |
| 1 | 2.450693000  | 14.730894000 | 6.134783000  |
| 6 | 4.529640000  | 14.681768000 | 5.541404000  |
| 1 | 4.743470000  | 15.707071000 | 5.818870000  |
| 6 | 5.534642000  | 13.872629000 | 5.009453000  |
| 6 | 6.955248000  | 14.392930000 | 5.007375000  |
| 1 | 6.941975000  | 15.483483000 | 4.877931000  |
| 1 | 7.354849000  | 14.203291000 | 6.007516000  |
| 6 | 8.033809000  | 14.634403000 | 2.813717000  |
| 1 | 8.874161000  | 14.240601000 | 2.234876000  |
| 1 | 8.254112000  | 15.675893000 | 3.089395000  |
| 6 | 6.804004000  | 14.584668000 | 1.937777000  |
| 6 | 6.409909000  | 15.698581000 | 1.204206000  |
| 1 | 6.940432000  | 16.636802000 | 1.309570000  |
| 6 | 5.322150000  | 15.567241000 | 0.327316000  |
| 1 | 4.994789000  | 16.413239000 | -0.267489000 |
| 6 | 4.652086000  | 14.358875000 | 0.228571000  |
| 1 | 3.800520000  | 14.264124000 | -0.427700000 |
| 6 | 5.075324000  | 13.258052000 | 1.020399000  |
| 6 | 3.417603000  | 11.652522000 | 0.020427000  |
| 1 | 3.634256000  | 10.621603000 | -0.280914000 |
| 1 | 3.531309000  | 12.264802000 | -0.880461000 |
| 6 | 1.931540000  | 11.707749000 | 0.493105000  |
| 6 | 1.055397000  | 11.343147000 | -0.728913000 |
| 1 | -0.004585000 | 11.327637000 | -0.449676000 |
| 1 | 1.315567000  | 10.351820000 | -1.121017000 |
| 1 | 1.180980000  | 12.073109000 | -1.538457000 |
| 6 | 1.543410000  | 13.111251000 | 1.006577000  |
| 1 | 2.180080000  | 13.418505000 | 1.843618000  |
| 1 | 0.504267000  | 13.107857000 | 1.357891000  |
| 1 | 1.622244000  | 13.865810000 | 0.215309000  |
| 6 | 1.704947000  | 10.673422000 | 1.615856000  |
| 1 | 2.352777000  | 10.881833000 | 2.473046000  |
| 1 | 1.915537000  | 9.656544000  | 1.259084000  |
| 1 | 0.663692000  | 10.697663000 | 1.959307000  |
| 6 | 9.194955000  | 13.359398000 | 4.611415000  |
| 1 | 9.598545000  | 14.141417000 | 5.268904000  |
| 1 | 9.878953000  | 13.236699000 | 3.773382000  |
| 6 | 9.093325000  | 11.973532000 | 5.348797000  |
| 6 | 8.497599000  | 12.119598000 | 6.767336000  |
| 6 | 7.487188000  | 11.245294000 | 7.194060000  |
| 1 | 7.126505000  | 10.506546000 | 6.490573000  |
| 6 | 6.955867000  | 11.331973000 | 8.487464000  |
| 1 | 6.175448000  | 10.642595000 | 8.795360000  |
| 6 | 7.426447000  | 12.301261000 | 9.381225000  |
| 1 | 7.013727000  | 12.372200000 | 10.382745000 |
| 6 | 8.441196000  | 13.176255000 | 8.971877000  |
| 1 | 8.821903000  | 13.927881000 | 9.656828000  |
| 6 | 8.974073000  | 13.081892000 | 7.680399000  |
| 1 | 9.775992000  | 13.755702000 | 7.394298000  |
| 6 | 10.520616000 | 11.354236000 | 5.420638000  |
| 6 | 11.134188000 | 10.964060000 | 6.623785000  |
| 1 | 10.624035000 | 11.112309000 | 7.567035000  |
| 6 | 12.409756000 | 10.380715000 | 6.631514000  |
| 1 | 12.858365000 | 10.089951000 | 7.576897000  |
| 6 | 13.099665000 | 10.174589000 | 5.433655000  |
| 1 | 14.089088000 | 9.727668000  | 5.438287000  |
| 6 | 12.495151000 | 10.547130000 | 4.225101000  |
| 1 | 13.013066000 | 10.381634000 | 3.285335000  |
| 6 | 11.220409000 | 11.121973000 | 4.218551000  |
| 1 | 10.755777000 | 11.375223000 | 3.271404000  |
| 7 | 3.953216000  | 10.696269000 | 4.563379000  |
| 1 | 4.685551000  | 10.307726000 | 3.973013000  |
| 7 | 5.317073000  | 12.586227000 | 4.631351000  |
| 7 | 7.883935000  | 13.777370000 | 4.021376000  |
| 7 | 6.159592000  | 13.385092000 | 1.849361000  |
| 7 | 4.445148000  | 12.042846000 | 0.994659000  |
| 1 | 4.852804000  | 11.307031000 | 1.565037000  |
| 8 | 8.262179000  | 11.120505000 | 4.540961000  |
| 6 | 6.613243000  | 8.169537000  | 1.370314000  |
| 6 | 8.072685000  | 8.021560000  | 1.570600000  |

|    |              |              |              |
|----|--------------|--------------|--------------|
| 6  | 8.936794000  | 7.896775000  | 0.457610000  |
| 6  | 10.300217000 | 7.646586000  | 0.621465000  |
| 6  | 10.809026000 | 7.532952000  | 1.912038000  |
| 6  | 10.000200000 | 7.665868000  | 3.040116000  |
| 6  | 8.637305000  | 7.901223000  | 2.862601000  |
| 1  | 10.420642000 | 7.593278000  | 4.034553000  |
| 17 | 12.588789000 | 7.185981000  | 2.131878000  |
| 1  | 10.944579000 | 7.533308000  | -0.240976000 |
| 1  | 8.539043000  | 7.959073000  | -0.546383000 |
| 1  | 8.016478000  | 8.009048000  | 3.743105000  |
| 6  | 6.148820000  | 8.693154000  | 0.065083000  |
| 6  | 6.724641000  | 9.862057000  | -0.482793000 |
| 1  | 7.443306000  | 10.431152000 | 0.098657000  |
| 6  | 6.367632000  | 10.309788000 | -1.755796000 |
| 1  | 6.808726000  | 11.211762000 | -2.161636000 |
| 6  | 5.436003000  | 9.577680000  | -2.490262000 |
| 17 | 4.974560000  | 10.153116000 | -4.164496000 |
| 6  | 4.846521000  | 8.418768000  | -1.991206000 |
| 1  | 4.136262000  | 7.856837000  | -2.584473000 |
| 6  | 5.202349000  | 7.983624000  | -0.711463000 |
| 1  | 4.768661000  | 7.064379000  | -0.339145000 |
| 6  | 5.711385000  | 7.255176000  | 2.106603000  |
| 6  | 6.179545000  | 6.037268000  | 2.652888000  |
| 6  | 5.304482000  | 5.127048000  | 3.251972000  |
| 1  | 5.676211000  | 4.192686000  | 3.652910000  |
| 1  | 7.226111000  | 5.773748000  | 2.577767000  |
| 6  | 4.325665000  | 7.530239000  | 2.193023000  |
| 1  | 3.946440000  | 8.465946000  | 1.805319000  |
| 6  | 3.441687000  | 6.626112000  | 2.780305000  |
| 1  | 2.382274000  | 6.843886000  | 2.829921000  |
| 6  | 3.948143000  | 5.434884000  | 3.301847000  |
| 17 | 2.794356000  | 4.243795000  | 4.066458000  |

<sup>5</sup>P<sub>OH,1Cl</sub>:-

|    |             |              |              |
|----|-------------|--------------|--------------|
| 26 | 7.220714000 | 12.017855000 | 3.389223000  |
| 17 | 6.836143000 | 9.929388000  | 1.857464000  |
| 8  | 4.775856000 | 7.706456000  | 0.556717000  |
| 1  | 5.478977000 | 8.253214000  | 0.982320000  |
| 6  | 4.160677000 | 7.734054000  | 4.524473000  |
| 1  | 5.047793000 | 8.292561000  | 4.845429000  |
| 1  | 4.331115000 | 7.381695000  | 3.500300000  |
| 1  | 4.062035000 | 6.857723000  | 5.176097000  |
| 6  | 1.656800000 | 7.770122000  | 4.197619000  |
| 1  | 1.533566000 | 6.918707000  | 4.876946000  |
| 1  | 1.764534000 | 7.376065000  | 3.179244000  |
| 1  | 0.738163000 | 8.369298000  | 4.236807000  |
| 6  | 2.707676000 | 9.133652000  | 6.045517000  |
| 1  | 3.555531000 | 9.755476000  | 6.353642000  |
| 1  | 2.636416000 | 8.293111000  | 6.746752000  |
| 1  | 1.790611000 | 9.728156000  | 6.141623000  |
| 6  | 2.890493000 | 8.610204000  | 4.604591000  |
| 6  | 2.999610000 | 9.786747000  | 3.586605000  |
| 1  | 3.083054000 | 9.356979000  | 2.581575000  |
| 1  | 2.077015000 | 10.375456000 | 3.603318000  |
| 6  | 4.176978000 | 11.876708000 | 4.405958000  |
| 6  | 3.019909000 | 12.493607000 | 4.950035000  |
| 1  | 2.055090000 | 12.014327000 | 4.868207000  |
| 6  | 3.143511000 | 13.715425000 | 5.590931000  |
| 1  | 2.262038000 | 14.199897000 | 5.997238000  |
| 6  | 4.404795000 | 14.317118000 | 5.732026000  |
| 1  | 4.523934000 | 15.254036000 | 6.262357000  |
| 6  | 5.512421000 | 13.665243000 | 5.197254000  |
| 6  | 6.901644000 | 14.195854000 | 5.507228000  |
| 1  | 6.870389000 | 15.292563000 | 5.544462000  |
| 1  | 7.146616000 | 13.853155000 | 6.517827000  |
| 6  | 8.361496000 | 14.772238000 | 3.587756000  |
| 1  | 9.327370000 | 14.478550000 | 3.162251000  |
| 1  | 8.496835000 | 15.757948000 | 4.054819000  |
| 6  | 7.374472000 | 14.881960000 | 2.449744000  |
| 6  | 7.096750000 | 16.122543000 | 1.892191000  |
| 1  | 7.506636000 | 17.022429000 | 2.333180000  |
| 6  | 6.290007000 | 16.173847000 | 0.742342000  |
| 1  | 6.055537000 | 17.127322000 | 0.281631000  |
| 6  | 5.792030000 | 15.005732000 | 0.197352000  |
| 1  | 5.163510000 | 15.038383000 | -0.679705000 |



|    |              |              |              |
|----|--------------|--------------|--------------|
| 6  | 6.088410000  | 13.757951000 | 0.814389000  |
| 6  | 4.970552000  | 12.367944000 | -0.974788000 |
| 1  | 5.400247000  | 11.453183000 | -1.402010000 |
| 1  | 5.233149000  | 13.184109000 | -1.656740000 |
| 6  | 3.421934000  | 12.196387000 | -0.936457000 |
| 6  | 2.964029000  | 11.873310000 | -2.378094000 |
| 1  | 1.876060000  | 11.745041000 | -2.414002000 |
| 1  | 3.425270000  | 10.946537000 | -2.741715000 |
| 1  | 3.231585000  | 12.681615000 | -3.070571000 |
| 6  | 2.727180000  | 13.488384000 | -0.452929000 |
| 1  | 3.064943000  | 13.770615000 | 0.550698000  |
| 1  | 1.641137000  | 13.340760000 | -0.411736000 |
| 1  | 2.922924000  | 14.326576000 | -1.133315000 |
| 6  | 3.049136000  | 11.030714000 | 0.003998000  |
| 1  | 3.352639000  | 11.252306000 | 1.032620000  |
| 1  | 3.536778000  | 10.095617000 | -0.297871000 |
| 1  | 1.964680000  | 10.866681000 | -0.003381000 |
| 6  | 9.195662000  | 13.202656000 | 5.313883000  |
| 1  | 9.418399000  | 13.804422000 | 6.203738000  |
| 1  | 10.041092000 | 13.301067000 | 4.630631000  |
| 6  | 9.065867000  | 11.673768000 | 5.627953000  |
| 6  | 8.232043000  | 11.363488000 | 6.899787000  |
| 6  | 7.382849000  | 10.243685000 | 6.897131000  |
| 1  | 7.304639000  | 9.662792000  | 5.986721000  |
| 6  | 6.650171000  | 9.890002000  | 8.036050000  |
| 1  | 6.001732000  | 9.019311000  | 8.008467000  |
| 6  | 6.751555000  | 10.652133000 | 9.206909000  |
| 1  | 6.182226000  | 10.381005000 | 10.090406000 |
| 6  | 7.598152000  | 11.766443000 | 9.226404000  |
| 1  | 7.689675000  | 12.365951000 | 10.127097000 |
| 6  | 8.334365000  | 12.115049000 | 8.085781000  |
| 1  | 8.988542000  | 12.979325000 | 8.138864000  |
| 6  | 10.494597000 | 11.102869000 | 5.834772000  |
| 6  | 11.401767000 | 11.668578000 | 6.749834000  |
| 1  | 11.117314000 | 12.527341000 | 7.348860000  |
| 6  | 12.685087000 | 11.131778000 | 6.910481000  |
| 1  | 13.371756000 | 11.584908000 | 7.619267000  |
| 6  | 13.081512000 | 10.014841000 | 6.164052000  |
| 1  | 14.075158000 | 9.596515000  | 6.291287000  |
| 6  | 12.184021000 | 9.444334000  | 5.253303000  |
| 1  | 12.480052000 | 8.578101000  | 4.668781000  |
| 6  | 10.903552000 | 9.986871000  | 5.088358000  |
| 1  | 10.202323000 | 9.563111000  | 4.380693000  |
| 7  | 4.153446000  | 10.672024000 | 3.769286000  |
| 1  | 5.031772000  | 10.353540000 | 3.369412000  |
| 7  | 5.402761000  | 12.494409000 | 4.508925000  |
| 7  | 7.993648000  | 13.743789000 | 4.598323000  |
| 7  | 6.873069000  | 13.711987000 | 1.946387000  |
| 7  | 5.633805000  | 12.574891000 | 0.318420000  |
| 1  | 5.935129000  | 11.732238000 | 0.802487000  |
| 8  | 8.471096000  | 11.063472000 | 4.487058000  |
| 6  | 5.326122000  | 6.444996000  | 0.034091000  |
| 6  | 6.476534000  | 6.758918000  | -0.944580000 |
| 6  | 7.578872000  | 5.903922000  | -1.103570000 |
| 6  | 8.580410000  | 6.185388000  | -2.042660000 |
| 6  | 8.462578000  | 7.334133000  | -2.817131000 |
| 6  | 7.382901000  | 8.204995000  | -2.690324000 |
| 6  | 6.390141000  | 7.906094000  | -1.752057000 |
| 1  | 7.311949000  | 9.093549000  | -3.305407000 |
| 17 | 9.771468000  | 7.715496000  | -4.046083000 |
| 1  | 9.428839000  | 5.522395000  | -2.157618000 |
| 1  | 7.673360000  | 5.013138000  | -0.493923000 |
| 1  | 5.542644000  | 8.571160000  | -1.640915000 |
| 6  | 4.161433000  | 5.789462000  | -0.730737000 |
| 6  | 2.840825000  | 6.211183000  | -0.512155000 |
| 1  | 2.651025000  | 7.015719000  | 0.184462000  |
| 6  | 1.772050000  | 5.610744000  | -1.190203000 |
| 1  | 0.755756000  | 5.944446000  | -1.020267000 |
| 6  | 2.043234000  | 4.580447000  | -2.084235000 |
| 17 | 0.649239000  | 3.788293000  | -2.980071000 |
| 6  | 3.339121000  | 4.132166000  | -2.324389000 |
| 1  | 3.528707000  | 3.330073000  | -3.026800000 |
| 6  | 4.395736000  | 4.746435000  | -1.642901000 |
| 1  | 5.406525000  | 4.406640000  | -1.836906000 |
| 6  | 5.793305000  | 5.598175000  | 1.237323000  |

|    |             |             |             |
|----|-------------|-------------|-------------|
| 6  | 6.873082000 | 6.056871000 | 2.018027000 |
| 6  | 7.289861000 | 5.362266000 | 3.157112000 |
| 1  | 8.121107000 | 5.723675000 | 3.749666000 |
| 1  | 7.397800000 | 6.966268000 | 1.744979000 |
| 6  | 5.135431000 | 4.423983000 | 1.632820000 |
| 1  | 4.298987000 | 4.047303000 | 1.058557000 |
| 6  | 5.541094000 | 3.713119000 | 2.771073000 |
| 1  | 5.026964000 | 2.806407000 | 3.064801000 |
| 6  | 6.612447000 | 4.197478000 | 3.511654000 |
| 17 | 7.154054000 | 3.274241000 | 5.002397000 |

<sup>5</sup>TS<sub>Cl,1Cl</sub>:

|    |             |              |              |
|----|-------------|--------------|--------------|
| 26 | 6.874989000 | 12.733024000 | 3.626713000  |
| 17 | 8.684183000 | 12.281002000 | 1.794956000  |
| 8  | 6.041524000 | 11.004185000 | 3.337679000  |
| 1  | 6.600528000 | 10.223045000 | 3.172630000  |
| 6  | 5.062955000 | 8.602841000  | 6.188630000  |
| 1  | 5.865114000 | 9.273492000  | 5.860514000  |
| 1  | 4.695364000 | 8.055954000  | 5.310775000  |
| 1  | 5.494024000 | 7.873576000  | 6.884972000  |
| 6  | 2.792101000 | 8.411952000  | 7.277631000  |
| 1  | 3.172571000 | 7.656583000  | 7.975256000  |
| 1  | 2.384489000 | 7.888694000  | 6.403393000  |
| 1  | 1.968431000 | 8.943191000  | 7.771399000  |
| 6  | 4.457838000 | 10.112058000 | 8.122142000  |
| 1  | 5.229801000 | 10.841690000 | 7.854202000  |
| 1  | 4.901941000 | 9.389306000  | 8.817451000  |
| 1  | 3.655516000 | 10.639479000 | 8.652872000  |
| 6  | 3.918873000 | 9.389222000  | 6.868772000  |
| 6  | 3.308490000 | 10.409995000 | 5.858782000  |
| 1  | 2.918790000 | 9.843715000  | 5.002992000  |
| 1  | 2.448908000 | 10.906556000 | 6.319831000  |
| 6  | 4.336453000 | 12.707654000 | 5.721525000  |
| 6  | 3.528454000 | 13.281691000 | 6.740568000  |
| 1  | 2.791823000 | 12.679952000 | 7.252772000  |
| 6  | 3.710292000 | 14.609069000 | 7.090284000  |
| 1  | 3.099655000 | 15.048322000 | 7.872182000  |
| 6  | 4.692708000 | 15.376979000 | 6.448400000  |
| 1  | 4.868979000 | 16.410121000 | 6.722358000  |
| 6  | 5.451619000 | 14.775496000 | 5.446768000  |
| 6  | 6.466504000 | 15.622617000 | 4.708994000  |
| 1  | 5.915298000 | 16.278055000 | 4.024627000  |
| 1  | 6.972602000 | 16.277077000 | 5.427261000  |
| 6  | 7.556968000 | 15.444571000 | 2.518717000  |
| 1  | 8.418519000 | 14.988228000 | 2.023423000  |
| 1  | 7.701782000 | 16.532690000 | 2.537914000  |
| 6  | 6.312080000 | 15.083707000 | 1.746378000  |
| 6  | 5.731409000 | 15.966021000 | 0.843372000  |
| 1  | 6.130967000 | 16.964800000 | 0.719381000  |
| 6  | 4.615407000 | 15.524755000 | 0.109755000  |
| 1  | 4.123167000 | 16.194239000 | -0.587632000 |
| 6  | 4.140097000 | 14.235709000 | 0.276877000  |
| 1  | 3.278711000 | 13.892435000 | -0.278429000 |
| 6  | 4.787094000 | 13.360606000 | 1.197841000  |
| 6  | 3.391657000 | 11.426747000 | 0.517654000  |
| 1  | 3.539304000 | 11.736456000 | -0.526485000 |
| 1  | 2.387070000 | 11.766645000 | 0.815052000  |
| 6  | 3.422919000 | 9.875582000  | 0.559565000  |
| 6  | 2.336125000 | 9.375578000  | -0.422511000 |
| 1  | 2.303194000 | 8.280070000  | -0.426226000 |
| 1  | 2.542596000 | 9.711787000  | -1.445990000 |
| 1  | 1.343150000 | 9.742911000  | -0.135000000 |
| 6  | 3.099471000 | 9.353113000  | 1.978691000  |
| 1  | 3.868659000 | 9.646869000  | 2.699830000  |
| 1  | 3.044711000 | 8.257732000  | 1.973890000  |
| 1  | 2.132495000 | 9.738406000  | 2.325995000  |
| 6  | 4.803596000 | 9.348593000  | 0.103684000  |
| 1  | 5.600501000 | 9.670713000  | 0.782356000  |
| 1  | 5.046822000 | 9.708817000  | -0.903330000 |
| 1  | 4.801718000 | 8.252308000  | 0.080992000  |
| 6  | 8.836951000 | 14.780470000 | 4.540365000  |
| 1  | 9.126057000 | 15.743936000 | 4.976559000  |
| 1  | 9.541221000 | 14.547594000 | 3.740516000  |
| 6  | 8.914146000 | 13.604833000 | 5.568777000  |
| 6  | 8.388665000 | 13.961540000 | 6.981792000  |

|    |              |              |              |
|----|--------------|--------------|--------------|
| 6  | 7.715771000  | 12.976846000 | 7.725034000  |
| 1  | 7.528298000  | 12.017259000 | 7.260190000  |
| 6  | 7.287310000  | 13.230119000 | 9.032388000  |
| 1  | 6.768130000  | 12.454305000 | 9.587101000  |
| 6  | 7.523553000  | 14.477436000 | 9.624713000  |
| 1  | 7.189647000  | 14.676174000 | 10.638178000 |
| 6  | 8.198145000  | 15.464186000 | 8.897179000  |
| 1  | 8.391712000  | 16.434717000 | 9.343704000  |
| 6  | 8.631047000  | 15.206458000 | 7.589476000  |
| 1  | 9.162455000  | 15.989231000 | 7.058659000  |
| 6  | 10.392781000 | 13.161557000 | 5.704524000  |
| 6  | 11.415648000 | 14.091884000 | 5.964081000  |
| 1  | 11.184320000 | 15.145606000 | 6.079680000  |
| 6  | 12.747013000 | 13.675407000 | 6.086414000  |
| 1  | 13.522749000 | 14.408326000 | 6.286207000  |
| 6  | 13.076494000 | 12.319655000 | 5.957723000  |
| 1  | 14.108007000 | 11.996134000 | 6.054720000  |
| 6  | 12.063047000 | 11.387054000 | 5.705197000  |
| 1  | 12.306256000 | 10.333885000 | 5.602210000  |
| 6  | 10.732006000 | 11.805362000 | 5.578424000  |
| 1  | 9.943812000  | 11.091741000 | 5.374870000  |
| 7  | 4.241778000  | 11.407294000 | 5.335922000  |
| 1  | 4.892792000  | 11.106397000 | 4.592667000  |
| 7  | 5.274924000  | 13.483875000 | 5.067536000  |
| 7  | 7.486443000  | 14.881503000 | 3.902249000  |
| 7  | 5.840438000  | 13.822195000 | 1.953733000  |
| 7  | 4.415526000  | 12.064079000 | 1.352058000  |
| 1  | 4.942785000  | 11.510602000 | 2.044294000  |
| 8  | 8.139924000  | 12.530211000 | 5.022993000  |
| 6  | 10.476664000 | 11.319407000 | 0.335244000  |
| 6  | 10.718693000 | 10.072336000 | 1.100889000  |
| 6  | 12.005959000 | 9.729654000  | 1.575349000  |
| 6  | 12.236892000 | 8.540711000  | 2.275470000  |
| 6  | 11.167989000 | 7.680322000  | 2.503824000  |
| 6  | 9.880666000  | 7.968797000  | 2.051041000  |
| 6  | 9.666079000  | 9.158126000  | 1.354403000  |
| 1  | 9.061029000  | 7.287019000  | 2.242473000  |
| 17 | 11.459370000 | 6.118904000  | 3.422962000  |
| 1  | 13.232660000 | 8.293052000  | 2.622081000  |
| 1  | 12.845158000 | 10.385484000 | 1.380875000  |
| 1  | 8.664297000  | 9.398999000  | 1.021225000  |
| 6  | 11.451855000 | 12.428236000 | 0.473168000  |
| 6  | 11.924227000 | 12.826941000 | 1.748484000  |
| 1  | 11.532228000 | 12.345614000 | 2.635583000  |
| 6  | 12.859969000 | 13.851553000 | 1.894617000  |
| 1  | 13.199375000 | 14.146049000 | 2.880168000  |
| 6  | 13.336936000 | 14.491457000 | 0.750977000  |
| 17 | 14.565309000 | 15.843576000 | 0.934522000  |
| 6  | 12.910423000 | 14.133799000 | -0.523881000 |
| 1  | 13.302577000 | 14.633325000 | -1.401251000 |
| 6  | 11.971359000 | 13.105096000 | -0.654812000 |
| 1  | 11.658375000 | 12.815485000 | -1.650150000 |
| 6  | 9.688971000  | 11.229318000 | -0.918516000 |
| 6  | 9.564963000  | 10.014105000 | -1.631404000 |
| 6  | 8.844154000  | 9.936193000  | -2.827728000 |
| 1  | 8.769266000  | 8.997523000  | -3.362903000 |
| 1  | 10.052616000 | 9.120344000  | -1.262998000 |
| 6  | 9.058681000  | 12.373879000 | -1.466835000 |
| 1  | 9.114801000  | 13.314725000 | -0.934253000 |
| 6  | 8.335863000  | 12.311737000 | -2.658224000 |
| 1  | 7.852140000  | 13.195730000 | -3.055443000 |
| 6  | 8.238819000  | 11.087849000 | -3.320003000 |
| 17 | 7.286747000  | 10.996799000 | -4.886574000 |

<sup>5</sup>P<sub>Cl,1Cl</sub>:

|    |             |              |             |
|----|-------------|--------------|-------------|
| 26 | 7.099300000 | 12.664443000 | 3.797263000 |
| 17 | 9.604607000 | 9.946958000  | 1.754634000 |
| 8  | 6.187899000 | 10.900244000 | 3.453733000 |
| 1  | 6.684090000 | 10.068440000 | 3.564761000 |
| 6  | 4.691121000 | 8.972568000  | 6.340797000 |
| 1  | 5.594734000 | 9.525776000  | 6.061494000 |
| 1  | 4.352870000 | 8.409382000  | 5.461504000 |
| 1  | 4.959787000 | 8.251280000  | 7.121987000 |
| 6  | 2.314953000 | 9.111509000  | 7.183668000 |
| 1  | 2.531395000 | 8.368677000  | 7.960543000 |

|   |              |              |              |
|---|--------------|--------------|--------------|
| 1 | 1.940407000  | 8.577492000  | 6.301220000  |
| 1 | 1.512972000  | 9.762966000  | 7.553645000  |
| 6 | 4.073771000  | 10.672613000 | 8.104405000  |
| 1 | 4.948343000  | 11.292453000 | 7.879473000  |
| 1 | 4.356604000  | 9.956305000  | 8.885661000  |
| 1 | 3.288741000  | 11.321415000 | 8.512744000  |
| 6 | 3.584335000  | 9.927060000  | 6.844535000  |
| 6 | 3.205729000  | 10.937081000 | 5.716841000  |
| 1 | 2.839921000  | 10.359248000 | 4.857125000  |
| 1 | 2.368418000  | 11.557438000 | 6.053542000  |
| 6 | 4.482345000  | 13.100661000 | 5.541164000  |
| 6 | 3.656777000  | 13.838807000 | 6.432188000  |
| 1 | 2.829061000  | 13.359592000 | 6.935351000  |
| 6 | 3.941766000  | 15.174261000 | 6.672145000  |
| 1 | 3.320271000  | 15.739620000 | 7.359129000  |
| 6 | 5.034120000  | 15.792211000 | 6.043149000  |
| 1 | 5.277722000  | 16.831032000 | 6.230594000  |
| 6 | 5.807963000  | 15.030600000 | 5.168999000  |
| 6 | 6.938349000  | 15.698299000 | 4.403485000  |
| 1 | 6.484802000  | 16.242833000 | 3.565393000  |
| 1 | 7.406060000  | 16.453519000 | 5.048233000  |
| 6 | 8.266112000  | 15.110522000 | 2.413059000  |
| 1 | 9.168949000  | 14.558139000 | 2.132552000  |
| 1 | 8.481166000  | 16.180299000 | 2.274569000  |
| 6 | 7.150348000  | 14.688191000 | 1.485408000  |
| 6 | 6.775468000  | 15.486580000 | 0.409214000  |
| 1 | 7.228359000  | 16.459819000 | 0.265065000  |
| 6 | 5.801327000  | 14.992756000 | -0.477086000 |
| 1 | 5.477770000  | 15.594061000 | -1.320416000 |
| 6 | 5.248082000  | 13.739924000 | -0.273149000 |
| 1 | 4.489385000  | 13.359190000 | -0.942897000 |
| 6 | 5.666209000  | 12.960169000 | 0.847206000  |
| 6 | 4.265618000  | 11.032284000 | 0.177128000  |
| 1 | 4.629755000  | 11.144324000 | -0.854990000 |
| 1 | 3.267373000  | 11.498590000 | 0.214593000  |
| 6 | 4.112748000  | 9.514763000  | 0.464485000  |
| 6 | 3.178239000  | 8.938386000  | -0.626113000 |
| 1 | 3.024704000  | 7.864813000  | -0.466892000 |
| 1 | 3.605790000  | 9.074585000  | -1.627274000 |
| 1 | 2.196124000  | 9.427135000  | -0.604208000 |
| 6 | 3.476946000  | 9.277689000  | 1.854626000  |
| 1 | 4.124623000  | 9.647288000  | 2.655866000  |
| 1 | 3.313261000  | 8.205051000  | 2.016466000  |
| 1 | 2.505268000  | 9.782390000  | 1.929607000  |
| 6 | 5.487004000  | 8.809718000  | 0.385407000  |
| 1 | 6.167272000  | 9.171990000  | 1.162932000  |
| 1 | 5.960527000  | 8.981911000  | -0.589303000 |
| 1 | 5.366699000  | 7.727607000  | 0.517611000  |
| 6 | 9.229349000  | 14.676619000 | 4.648032000  |
| 1 | 9.496926000  | 15.650225000 | 5.079067000  |
| 1 | 10.025356000 | 14.396950000 | 3.955331000  |
| 6 | 9.174115000  | 13.534772000 | 5.721184000  |
| 6 | 8.496327000  | 13.961336000 | 7.050369000  |
| 6 | 7.742458000  | 13.008777000 | 7.757246000  |
| 1 | 7.610739000  | 12.030724000 | 7.311289000  |
| 6 | 7.168594000  | 13.315489000 | 8.995787000  |
| 1 | 6.593100000  | 12.560830000 | 9.523877000  |
| 6 | 7.333022000  | 14.589765000 | 9.555002000  |
| 1 | 6.886889000  | 14.830767000 | 10.514929000 |
| 6 | 8.081400000  | 15.548178000 | 8.862861000  |
| 1 | 8.218151000  | 16.540387000 | 9.282826000  |
| 6 | 8.660518000  | 15.234847000 | 7.625453000  |
| 1 | 9.241446000  | 15.999518000 | 7.120851000  |
| 6 | 10.639698000 | 13.128570000 | 6.046800000  |
| 6 | 11.605945000 | 14.066155000 | 6.455896000  |
| 1 | 11.340229000 | 15.111007000 | 6.577814000  |
| 6 | 12.923320000 | 13.669999000 | 6.719896000  |
| 1 | 13.654998000 | 14.409846000 | 7.030577000  |
| 6 | 13.295736000 | 12.325298000 | 6.589513000  |
| 1 | 14.315274000 | 12.017012000 | 6.799572000  |
| 6 | 12.337795000 | 11.383441000 | 6.191840000  |
| 1 | 12.613062000 | 10.337288000 | 6.093113000  |
| 6 | 11.023409000 | 11.784504000 | 5.919072000  |
| 1 | 10.272885000 | 11.073397000 | 5.597846000  |
| 7 | 4.297459000  | 11.785597000 | 5.241636000  |

|    |              |              |              |
|----|--------------|--------------|--------------|
| 1  | 4.976074000  | 11.356368000 | 4.580646000  |
| 7  | 5.542588000  | 13.724465000 | 4.917553000  |
| 7  | 7.977128000  | 14.788956000 | 3.840468000  |
| 7  | 6.602918000  | 13.464712000 | 1.725414000  |
| 7  | 5.186477000  | 11.715613000 | 1.088517000  |
| 1  | 5.523854000  | 11.248162000 | 1.958893000  |
| 8  | 8.494042000  | 12.433303000 | 5.137339000  |
| 6  | 10.995936000 | 10.438046000 | 0.323626000  |
| 6  | 11.937708000 | 9.244531000  | 0.307662000  |
| 6  | 13.329391000 | 9.417116000  | 0.399016000  |
| 6  | 14.198918000 | 8.319947000  | 0.332372000  |
| 6  | 13.659581000 | 7.049352000  | 0.175861000  |
| 6  | 12.284555000 | 6.836838000  | 0.077427000  |
| 6  | 11.431580000 | 7.938891000  | 0.140880000  |
| 1  | 11.885171000 | 5.837611000  | -0.041891000 |
| 17 | 14.785328000 | 5.608313000  | 0.095057000  |
| 1  | 15.269547000 | 8.465257000  | 0.401863000  |
| 1  | 13.753058000 | 10.406176000 | 0.511839000  |
| 1  | 10.362018000 | 7.780515000  | 0.076952000  |
| 6  | 11.626066000 | 11.727041000 | 0.830818000  |
| 6  | 12.083646000 | 11.834948000 | 2.159167000  |
| 1  | 11.924718000 | 11.020541000 | 2.854520000  |
| 6  | 12.720450000 | 12.992016000 | 2.613030000  |
| 1  | 13.054241000 | 13.065209000 | 3.640698000  |
| 6  | 12.907489000 | 14.044541000 | 1.717782000  |
| 17 | 13.742169000 | 15.567008000 | 2.301065000  |
| 6  | 12.479761000 | 13.975259000 | 0.397226000  |
| 1  | 12.639218000 | 14.801736000 | -0.283732000 |
| 6  | 11.835513000 | 12.810500000 | -0.040984000 |
| 1  | 11.511178000 | 12.754651000 | -1.071824000 |
| 6  | 10.172869000 | 10.610629000 | -0.943944000 |
| 6  | 10.557176000 | 9.994841000  | -2.147201000 |
| 6  | 9.833399000  | 10.205647000 | -3.328955000 |
| 1  | 10.139789000 | 9.727550000  | -4.250763000 |
| 1  | 11.429165000 | 9.355207000  | -2.181728000 |
| 6  | 9.045404000  | 11.457137000 | -0.951039000 |
| 1  | 8.727117000  | 11.939510000 | -0.034764000 |
| 6  | 8.311851000  | 11.672060000 | -2.118499000 |
| 1  | 7.442632000  | 12.318050000 | -2.108616000 |
| 6  | 8.721369000  | 11.037395000 | -3.291053000 |
| 17 | 7.764470000  | 11.313522000 | -4.827458000 |

<sup>3</sup>Re<sub>1ci</sub>:

|    |             |              |             |
|----|-------------|--------------|-------------|
| 26 | 6.152087000 | 12.617055000 | 3.452727000 |
| 17 | 7.548680000 | 11.444391000 | 1.342854000 |
| 8  | 5.049624000 | 11.117353000 | 3.315252000 |
| 1  | 5.537472000 | 10.386619000 | 2.881711000 |
| 6  | 4.023190000 | 8.926667000  | 6.513575000 |
| 1  | 4.904275000 | 9.446492000  | 6.120478000 |
| 1  | 3.518955000 | 8.428085000  | 5.675661000 |
| 1  | 4.369049000 | 8.151635000  | 7.207964000 |
| 6  | 1.829568000 | 9.137564000  | 7.747178000 |
| 1  | 2.130700000 | 8.361379000  | 8.460474000 |
| 1  | 1.294277000 | 8.649386000  | 6.922922000 |
| 1  | 1.128727000 | 9.810450000  | 8.257552000 |
| 6  | 3.795233000 | 10.571783000 | 8.418629000 |
| 1  | 4.649862000 | 11.162745000 | 8.074465000 |
| 1  | 4.167021000 | 9.809231000  | 9.113862000 |
| 1  | 3.121315000 | 11.234436000 | 8.975908000 |
| 6  | 3.067604000 | 9.907392000  | 7.230880000 |
| 6  | 2.558425000 | 10.982206000 | 6.221945000 |
| 1  | 1.987854000 | 10.464514000 | 5.441392000 |
| 1  | 1.854962000 | 11.651123000 | 6.728749000 |
| 6  | 3.979994000 | 13.038056000 | 5.854970000 |
| 6  | 3.438869000 | 13.801437000 | 6.924715000 |
| 1  | 2.659966000 | 13.388882000 | 7.549934000 |
| 6  | 3.943262000 | 15.067151000 | 7.179547000 |
| 1  | 3.539485000 | 15.649168000 | 8.001239000 |
| 6  | 4.987486000 | 15.588598000 | 6.397777000 |
| 1  | 5.417391000 | 16.560282000 | 6.606948000 |
| 6  | 5.463898000 | 14.810044000 | 5.347090000 |
| 6  | 6.546714000 | 15.346551000 | 4.438089000 |
| 1  | 6.088517000 | 16.056821000 | 3.741975000 |
| 1  | 7.285196000 | 15.901860000 | 5.023472000 |
| 6  | 7.414768000 | 14.818432000 | 2.189137000 |

|    |              |              |              |
|----|--------------|--------------|--------------|
| 1  | 8.083342000  | 14.128193000 | 1.666641000  |
| 1  | 7.861145000  | 15.818410000 | 2.187437000  |
| 6  | 6.076546000  | 14.788701000 | 1.512935000  |
| 6  | 5.718840000  | 15.695240000 | 0.529044000  |
| 1  | 6.375475000  | 16.517752000 | 0.276359000  |
| 6  | 4.494857000  | 15.497221000 | -0.137597000 |
| 1  | 4.185397000  | 16.180464000 | -0.920799000 |
| 6  | 3.690719000  | 14.423871000 | 0.193843000  |
| 1  | 2.765128000  | 14.253253000 | -0.336030000 |
| 6  | 4.086488000  | 13.528050000 | 1.230787000  |
| 6  | 2.125320000  | 12.062571000 | 0.857814000  |
| 1  | 2.390787000  | 11.700384000 | -0.148301000 |
| 1  | 1.488641000  | 12.946373000 | 0.726876000  |
| 6  | 1.278334000  | 10.978402000 | 1.572730000  |
| 6  | 0.086801000  | 10.651188000 | 0.640595000  |
| 1  | -0.567771000 | 9.907328000  | 1.108920000  |
| 1  | 0.433230000  | 10.242505000 | -0.316503000 |
| 1  | -0.512304000 | 11.546709000 | 0.434454000  |
| 6  | 0.742199000  | 11.529015000 | 2.912977000  |
| 1  | 1.560299000  | 11.833821000 | 3.573212000  |
| 1  | 0.147211000  | 10.766871000 | 3.430171000  |
| 1  | 0.099699000  | 12.402544000 | 2.744648000  |
| 6  | 2.101184000  | 9.689644000  | 1.807708000  |
| 1  | 2.928112000  | 9.848811000  | 2.508111000  |
| 1  | 2.518616000  | 9.314929000  | 0.864741000  |
| 1  | 1.458427000  | 8.906248000  | 2.226717000  |
| 6  | 8.609170000  | 13.867799000 | 4.143549000  |
| 1  | 9.171916000  | 14.735162000 | 4.500703000  |
| 1  | 9.143312000  | 13.437240000 | 3.296823000  |
| 6  | 8.438657000  | 12.740546000 | 5.191229000  |
| 6  | 8.127989000  | 13.221912000 | 6.619752000  |
| 6  | 7.375906000  | 12.387508000 | 7.465018000  |
| 1  | 6.973328000  | 11.466798000 | 7.060447000  |
| 6  | 7.142481000  | 12.739015000 | 8.798043000  |
| 1  | 6.560907000  | 12.079109000 | 9.434027000  |
| 6  | 7.656645000  | 13.935968000 | 9.314978000  |
| 1  | 7.475261000  | 14.208925000 | 10.349602000 |
| 6  | 8.409887000  | 14.772547000 | 8.485759000  |
| 1  | 8.818838000  | 15.700737000 | 8.872624000  |
| 6  | 8.647033000  | 14.416100000 | 7.150528000  |
| 1  | 9.253766000  | 15.077624000 | 6.541135000  |
| 6  | 9.729563000  | 11.879498000 | 5.192106000  |
| 6  | 10.831842000 | 12.188224000 | 6.007942000  |
| 1  | 10.782526000 | 13.021213000 | 6.699728000  |
| 6  | 12.000069000 | 11.417001000 | 5.951253000  |
| 1  | 12.840007000 | 11.669106000 | 6.591360000  |
| 6  | 12.081096000 | 10.321444000 | 5.083283000  |
| 1  | 12.982884000 | 9.718220000  | 5.046103000  |
| 6  | 10.986429000 | 10.008991000 | 4.266755000  |
| 1  | 11.038499000 | 9.162544000  | 3.588631000  |
| 6  | 9.821077000  | 10.782925000 | 4.317013000  |
| 1  | 8.978843000  | 10.556316000 | 3.675553000  |
| 7  | 3.596223000  | 11.767887000 | 5.552346000  |
| 1  | 4.087622000  | 11.335458000 | 4.758382000  |
| 7  | 4.957121000  | 13.587559000 | 5.055375000  |
| 7  | 7.265149000  | 14.306772000 | 3.601437000  |
| 7  | 5.276673000  | 13.743654000 | 1.891716000  |
| 7  | 3.340494000  | 12.453647000 | 1.584356000  |
| 1  | 3.788271000  | 11.800226000 | 2.241354000  |
| 8  | 7.343367000  | 11.923859000 | 4.687995000  |
| 6  | 12.956300000 | 11.314391000 | 0.139959000  |
| 6  | 14.234270000 | 10.721959000 | 0.538698000  |
| 6  | 15.347289000 | 11.531359000 | 0.889905000  |
| 6  | 16.568564000 | 10.971544000 | 1.265997000  |
| 6  | 16.688692000 | 9.583031000  | 1.299956000  |
| 6  | 15.626967000 | 8.742928000  | 0.967575000  |
| 6  | 14.411764000 | 9.313561000  | 0.587840000  |
| 1  | 15.738461000 | 7.666555000  | 1.012313000  |
| 17 | 18.289705000 | 8.840564000  | 1.795907000  |
| 1  | 17.410081000 | 11.605640000 | 1.516560000  |
| 1  | 15.259819000 | 12.610207000 | 0.842658000  |
| 1  | 13.580135000 | 8.661467000  | 0.349137000  |
| 6  | 12.528958000 | 12.596699000 | 0.710417000  |
| 6  | 12.823960000 | 12.942936000 | 2.054378000  |
| 1  | 13.344533000 | 12.234931000 | 2.687892000  |

|    |             |             |             |
|----|-------------|-------------|-------------|
| 6  | 12.42112000 | 14.16354300 | 2.59899900  |
| 1  | 12.63839800 | 14.40125100 | 3.63294700  |
| 6  | 11.72053900 | 15.05822300 | 1.79180600  |
| 17 | 11.19517600 | 16.66967900 | 2.49733400  |
| 6  | 11.40270200 | 14.76590700 | 0.46632200  |
| 1  | 10.86534500 | 15.48021000 | -0.14531600 |
| 6  | 11.80285000 | 13.53835100 | -0.06388700 |
| 1  | 11.57085500 | 13.31395200 | -1.09823000 |
| 6  | 12.09707000 | 10.63153000 | -0.83402600 |
| 6  | 12.64595700 | 9.89822400  | -1.91798800 |
| 6  | 11.82993900 | 9.25326100  | -2.84866400 |
| 1  | 12.26466600 | 8.71061600  | -3.67916500 |
| 1  | 13.72132900 | 9.85423900  | -2.04538900 |
| 6  | 10.68348200 | 10.68222200 | -0.72456300 |
| 1  | 10.21601900 | 11.20335300 | 0.10316300  |
| 6  | 9.85830900  | 10.03374100 | -1.64470000 |
| 1  | 8.78238600  | 10.07135600 | -1.52712600 |
| 6  | 10.44643000 | 9.33168800  | -2.69481800 |
| 17 | 9.36934600  | 8.48153000  | -3.91233100 |

Data for 2<sub>OH</sub>:

<sup>5</sup>Re<sub>2OH</sub>:

|    |              |              |              |
|----|--------------|--------------|--------------|
| 26 | 7.099021000  | 12.650276000 | 4.094380000  |
| 17 | 6.139646000  | 10.427553000 | 3.483842000  |
| 6  | 3.526361000  | 8.891587000  | 6.699143000  |
| 1  | 4.494158000  | 9.394986000  | 6.805272000  |
| 1  | 3.557211000  | 8.279948000  | 5.788643000  |
| 1  | 3.402246000  | 8.217605000  | 7.555210000  |
| 6  | 1.022487000  | 9.162648000  | 6.502944000  |
| 1  | 0.860003000  | 8.501271000  | 7.361952000  |
| 1  | 1.006558000  | 8.546645000  | 5.595115000  |
| 1  | 0.180484000  | 9.864816000  | 6.453634000  |
| 6  | 2.357357000  | 10.756099000 | 7.937878000  |
| 1  | 3.288802000  | 11.322163000 | 8.049668000  |
| 1  | 2.251744000  | 10.105434000 | 8.814541000  |
| 1  | 1.520502000  | 11.465415000 | 7.944094000  |
| 6  | 2.367560000  | 9.912889000  | 6.644387000  |
| 6  | 2.522409000  | 10.823155000 | 5.386980000  |
| 1  | 2.474887000  | 10.184568000 | 4.496595000  |
| 1  | 1.669903000  | 11.506682000 | 5.325635000  |
| 6  | 3.969838000  | 12.887852000 | 5.621661000  |
| 6  | 2.917753000  | 13.724635000 | 6.088306000  |
| 1  | 1.915108000  | 13.333955000 | 6.183092000  |
| 6  | 3.189548000  | 15.036513000 | 6.428624000  |
| 1  | 2.389409000  | 15.682543000 | 6.773751000  |
| 6  | 4.505089000  | 15.521081000 | 6.345227000  |
| 1  | 4.751949000  | 16.532701000 | 6.642461000  |
| 6  | 5.498465000  | 14.662443000 | 5.887414000  |
| 6  | 6.940037000  | 15.101802000 | 5.966670000  |
| 1  | 6.995274000  | 16.197251000 | 6.000376000  |
| 1  | 7.340752000  | 14.732187000 | 6.913534000  |
| 6  | 7.838872000  | 15.495489000 | 3.695183000  |
| 1  | 8.644422000  | 15.148096000 | 3.042199000  |
| 1  | 8.057622000  | 16.526657000 | 4.000710000  |
| 6  | 6.540697000  | 15.440679000 | 2.925456000  |
| 6  | 5.972131000  | 16.593701000 | 2.398159000  |
| 1  | 6.416510000  | 17.561293000 | 2.594006000  |
| 6  | 4.813119000  | 16.465290000 | 1.614161000  |
| 1  | 4.333162000  | 17.346202000 | 1.201864000  |
| 6  | 4.278642000  | 15.212604000 | 1.368578000  |
| 1  | 3.382361000  | 15.107852000 | 0.774204000  |
| 6  | 4.908368000  | 14.060367000 | 1.920055000  |
| 6  | 3.364163000  | 12.543023000 | 0.699278000  |
| 1  | 3.540467000  | 13.150149000 | -0.198982000 |
| 1  | 2.398652000  | 12.860855000 | 1.122010000  |
| 6  | 3.244865000  | 11.061335000 | 0.254183000  |
| 6  | 2.131792000  | 11.009036000 | -0.821046000 |
| 1  | 1.986331000  | 9.978453000  | -1.164127000 |
| 1  | 2.392053000  | 11.622540000 | -1.692335000 |
| 1  | 1.176353000  | 11.369918000 | -0.420453000 |
| 6  | 2.837190000  | 10.157008000 | 1.440476000  |
| 1  | 3.600889000  | 10.142723000 | 2.224362000  |
| 1  | 2.696348000  | 9.125562000  | 1.095960000  |
| 1  | 1.892295000  | 10.498462000 | 1.881237000  |
| 6  | 4.572953000  | 10.567552000 | -0.365874000 |
| 1  | 5.386881000  | 10.555913000 | 0.366602000  |
| 1  | 4.874469000  | 11.208465000 | -1.203848000 |
| 1  | 4.453372000  | 9.546512000  | -0.747004000 |
| 6  | 9.200799000  | 14.244749000 | 5.354889000  |
| 1  | 9.619144000  | 15.065634000 | 5.949213000  |
| 1  | 9.808553000  | 14.120759000 | 4.460289000  |
| 6  | 9.209109000  | 12.881466000 | 6.135292000  |
| 6  | 8.874142000  | 13.036321000 | 7.631396000  |
| 6  | 7.990157000  | 12.131811000 | 8.242744000  |
| 1  | 7.536475000  | 11.361141000 | 7.632378000  |
| 6  | 7.692220000  | 12.230932000 | 9.607201000  |
| 1  | 7.004046000  | 11.523182000 | 10.059203000 |
| 6  | 8.276366000  | 13.236454000 | 10.386952000 |
| 1  | 8.043929000  | 13.315650000 | 11.444161000 |
| 6  | 9.166254000  | 14.138831000 | 9.791096000  |
| 1  | 9.630115000  | 14.920011000 | 10.385260000 |
| 6  | 9.465013000  | 14.037488000 | 8.426732000  |
| 1  | 10.169378000 | 14.739543000 | 7.991408000  |
| 6  | 10.587755000 | 12.199539000 | 5.927444000  |
| 6  | 11.491071000 | 11.944043000 | 6.970892000  |



|    |              |              |              |
|----|--------------|--------------|--------------|
| 1  | 11.249208000 | 12.234585000 | 7.985616000  |
| 6  | 12.715723000 | 11.307811000 | 6.719407000  |
| 1  | 13.399381000 | 11.120751000 | 7.541951000  |
| 6  | 13.053152000 | 10.913117000 | 5.421692000  |
| 1  | 14.000784000 | 10.420193000 | 5.227583000  |
| 6  | 12.154132000 | 11.157566000 | 4.373708000  |
| 1  | 12.403653000 | 10.850708000 | 3.362057000  |
| 6  | 10.933280000 | 11.791903000 | 4.621948000  |
| 1  | 10.234060000 | 11.969793000 | 3.809149000  |
| 7  | 3.774330000  | 11.577813000 | 5.309725000  |
| 1  | 4.572719000  | 11.084269000 | 4.922636000  |
| 7  | 5.248384000  | 13.383496000 | 5.480342000  |
| 7  | 7.818981000  | 14.585709000 | 4.877863000  |
| 7  | 6.016526000  | 14.196804000 | 2.718641000  |
| 7  | 4.447968000  | 12.805527000 | 1.656264000  |
| 1  | 4.904770000  | 12.023756000 | 2.114541000  |
| 8  | 8.203419000  | 12.058302000 | 5.502393000  |
| 6  | 11.429894000 | 10.930424000 | -0.244718000 |
| 6  | 12.867961000 | 10.683530000 | -0.383100000 |
| 6  | 13.693534000 | 11.524219000 | -1.174985000 |
| 6  | 15.062132000 | 11.287414000 | -1.309171000 |
| 6  | 15.624011000 | 10.199957000 | -0.641860000 |
| 6  | 14.858549000 | 9.344011000  | 0.148413000  |
| 6  | 13.489762000 | 9.586549000  | 0.270150000  |
| 1  | 15.317538000 | 8.510869000  | 0.666338000  |
| 17 | 17.422015000 | 9.885690000  | -0.810138000 |
| 1  | 15.673360000 | 11.931629000 | -1.929255000 |
| 1  | 13.252373000 | 12.356414000 | -1.710599000 |
| 1  | 12.895747000 | 8.932252000  | 0.897046000  |
| 6  | 10.909815000 | 12.299216000 | -0.254466000 |
| 6  | 11.663607000 | 13.383411000 | 0.267772000  |
| 1  | 12.635412000 | 13.196004000 | 0.708473000  |
| 6  | 11.171690000 | 14.689400000 | 0.256666000  |
| 1  | 11.758432000 | 15.500959000 | 0.669259000  |
| 6  | 9.909828000  | 14.926750000 | -0.286046000 |
| 17 | 9.262169000  | 16.641800000 | -0.317645000 |
| 6  | 9.127265000  | 13.898077000 | -0.810684000 |
| 1  | 8.155680000  | 14.107021000 | -1.241691000 |
| 6  | 9.627786000  | 12.595141000 | -0.789522000 |
| 1  | 9.029754000  | 11.798415000 | -1.215384000 |
| 6  | 10.506922000 | 9.797212000  | -0.098097000 |
| 6  | 10.725794000 | 8.580429000  | -0.793856000 |
| 6  | 9.851057000  | 7.500479000  | -0.665275000 |
| 1  | 10.023789000 | 6.583356000  | -1.215010000 |
| 1  | 11.576436000 | 8.489049000  | -1.459300000 |
| 6  | 9.367653000  | 9.880056000  | 0.743436000  |
| 1  | 9.179928000  | 10.780306000 | 1.320762000  |
| 6  | 8.490870000  | 8.801764000  | 0.886087000  |
| 1  | 7.638726000  | 8.882233000  | 1.550666000  |
| 6  | 8.746714000  | 7.631030000  | 0.175266000  |
| 17 | 7.596328000  | 6.212130000  | 0.351475000  |
| 8  | 8.424395000  | 12.633458000 | 2.718139000  |
| 1  | 8.157015000  | 12.932562000 | 1.825718000  |

<sup>5</sup>TS<sub>OH,20H:</sub>

|    |             |              |             |
|----|-------------|--------------|-------------|
| 26 | 7.521133000 | 12.339044000 | 3.698806000 |
| 17 | 6.024886000 | 10.542354000 | 2.740747000 |
| 6  | 3.573955000 | 8.996437000  | 6.211229000 |
| 1  | 4.613974000 | 9.340972000  | 6.244542000 |
| 1  | 3.420372000 | 8.463093000  | 5.264475000 |
| 1  | 3.429761000 | 8.280610000  | 7.029486000 |
| 6  | 1.136483000 | 9.653894000  | 6.292404000 |
| 1  | 0.951560000 | 8.949105000  | 7.111501000 |
| 1  | 0.940676000 | 9.131719000  | 5.347405000 |
| 1  | 0.414235000 | 10.475063000 | 6.384082000 |
| 6  | 2.829129000 | 10.900529000 | 7.693087000 |
| 1  | 3.846075000 | 11.304488000 | 7.750345000 |
| 1  | 2.696620000 | 10.201315000 | 8.527769000 |
| 1  | 2.122465000 | 11.727858000 | 7.832849000 |
| 6  | 2.589701000 | 10.180062000 | 6.348392000 |
| 6  | 2.773425000 | 11.162404000 | 5.150063000 |
| 1  | 2.561595000 | 10.612973000 | 4.224832000 |
| 1  | 2.025753000 | 11.959236000 | 5.217474000 |
| 6  | 4.519503000 | 12.976758000 | 5.419070000 |
| 6  | 3.636837000 | 13.919435000 | 6.013311000 |

|   |              |              |              |
|---|--------------|--------------|--------------|
| 1 | 2.590594000  | 13.681496000 | 6.141061000  |
| 6 | 4.131723000  | 15.141729000 | 6.434035000  |
| 1 | 3.462128000  | 15.872764000 | 6.874935000  |
| 6 | 5.501450000  | 15.420459000 | 6.309897000  |
| 1 | 5.922062000  | 16.350308000 | 6.673039000  |
| 6 | 6.323574000  | 14.455098000 | 5.732520000  |
| 6 | 7.820944000  | 14.643747000 | 5.799672000  |
| 1 | 8.055425000  | 15.714051000 | 5.872366000  |
| 1 | 8.153725000  | 14.184228000 | 6.734383000  |
| 6 | 8.866305000  | 15.004740000 | 3.598369000  |
| 1 | 9.580103000  | 14.533986000 | 2.917165000  |
| 1 | 9.316301000  | 15.926281000 | 3.992928000  |
| 6 | 7.603928000  | 15.336279000 | 2.836671000  |
| 6 | 7.325244000  | 16.645855000 | 2.461761000  |
| 1 | 7.983686000  | 17.451424000 | 2.761982000  |
| 6 | 6.175524000  | 16.889376000 | 1.692101000  |
| 1 | 5.926033000  | 17.900197000 | 1.387676000  |
| 6 | 5.354445000  | 15.837541000 | 1.325479000  |
| 1 | 4.464354000  | 16.017323000 | 0.739856000  |
| 6 | 5.683617000  | 14.514030000 | 1.737036000  |
| 6 | 3.745023000  | 13.592807000 | 0.492767000  |
| 1 | 4.055615000  | 14.123994000 | -0.418709000 |
| 1 | 2.978624000  | 14.212800000 | 0.982618000  |
| 6 | 3.088208000  | 12.253877000 | 0.067705000  |
| 6 | 1.930713000  | 12.614177000 | -0.895577000 |
| 1 | 1.414277000  | 11.704561000 | -1.222386000 |
| 1 | 2.304443000  | 13.130568000 | -1.788172000 |
| 1 | 1.194527000  | 13.263795000 | -0.406133000 |
| 6 | 2.509243000  | 11.510448000 | 1.293398000  |
| 1 | 3.294801000  | 11.208903000 | 1.992798000  |
| 1 | 1.984919000  | 10.603415000 | 0.969309000  |
| 1 | 1.791610000  | 12.143719000 | 1.829935000  |
| 6 | 4.102007000  | 11.353766000 | -0.675977000 |
| 1 | 4.936083000  | 11.058080000 | -0.031247000 |
| 1 | 4.509800000  | 11.869199000 | -1.553746000 |
| 1 | 3.607227000  | 10.437959000 | -1.021323000 |
| 6 | 9.858001000  | 13.366760000 | 5.172841000  |
| 1 | 10.393892000 | 14.023731000 | 5.870486000  |
| 1 | 10.481626000 | 13.212798000 | 4.292901000  |
| 6 | 9.557496000  | 11.956453000 | 5.790036000  |
| 6 | 9.125066000  | 12.021619000 | 7.281032000  |
| 6 | 7.961765000  | 11.355964000 | 7.698507000  |
| 1 | 7.373469000  | 10.836378000 | 6.953582000  |
| 6 | 7.570042000  | 11.371293000 | 9.043435000  |
| 1 | 6.666954000  | 10.849027000 | 9.345504000  |
| 6 | 8.335333000  | 12.055274000 | 9.995381000  |
| 1 | 8.031142000  | 12.069949000 | 11.037308000 |
| 6 | 9.501697000  | 12.718051000 | 9.591096000  |
| 1 | 10.107495000 | 13.248360000 | 10.319662000 |
| 6 | 9.895059000  | 12.695943000 | 8.247918000  |
| 1 | 10.811163000 | 13.203473000 | 7.962970000  |
| 6 | 10.833752000 | 11.081993000 | 5.714104000  |
| 6 | 12.122706000 | 11.608207000 | 5.921470000  |
| 1 | 12.263457000 | 12.666700000 | 6.114782000  |
| 6 | 13.250533000 | 10.776715000 | 5.884058000  |
| 1 | 14.236255000 | 11.202691000 | 6.045284000  |
| 6 | 13.108061000 | 9.405227000  | 5.643201000  |
| 1 | 13.981123000 | 8.760827000  | 5.616580000  |
| 6 | 11.828920000 | 8.873534000  | 5.434177000  |
| 1 | 11.706222000 | 7.812248000  | 5.241004000  |
| 6 | 10.703841000 | 9.705327000  | 5.467218000  |
| 1 | 9.713720000  | 9.304076000  | 5.290372000  |
| 7 | 4.110107000  | 11.740886000 | 5.014874000  |
| 1 | 4.793296000  | 11.191825000 | 4.501847000  |
| 7 | 5.851253000  | 13.277046000 | 5.240000000  |
| 7 | 8.605585000  | 14.027836000 | 4.692626000  |
| 7 | 6.804098000  | 14.281633000 | 2.497075000  |
| 7 | 4.908834000  | 13.452133000 | 1.379040000  |
| 1 | 5.169325000  | 12.532989000 | 1.724402000  |
| 8 | 8.521495000  | 11.366146000 | 5.006702000  |
| 6 | 10.178369000 | 11.311266000 | 0.560479000  |
| 6 | 11.360218000 | 12.179151000 | 0.761037000  |
| 6 | 11.943535000 | 12.914127000 | -0.295563000 |
| 6 | 13.090293000 | 13.689528000 | -0.094433000 |
| 6 | 13.656626000 | 13.728809000 | 1.175984000  |

|    |              |              |              |
|----|--------------|--------------|--------------|
| 6  | 13.122629000 | 13.011127000 | 2.246333000  |
| 6  | 11.981537000 | 12.238899000 | 2.031069000  |
| 1  | 13.580971000 | 13.050683000 | 3.226645000  |
| 17 | 15.155600000 | 14.745677000 | 1.449312000  |
| 1  | 13.532947000 | 14.238132000 | -0.916403000 |
| 1  | 11.523134000 | 12.861447000 | -1.292017000 |
| 1  | 11.550392000 | 11.687434000 | 2.856034000  |
| 6  | 9.256060000  | 11.593021000 | -0.556964000 |
| 6  | 8.942480000  | 12.926305000 | -0.931442000 |
| 1  | 9.365860000  | 13.757672000 | -0.379224000 |
| 6  | 8.089803000  | 13.204692000 | -1.999078000 |
| 1  | 7.856494000  | 14.228598000 | -2.263203000 |
| 6  | 7.545308000  | 12.140724000 | -2.717411000 |
| 17 | 6.437525000  | 12.499297000 | -4.129683000 |
| 6  | 7.825180000  | 10.815728000 | -2.393510000 |
| 1  | 7.401597000  | 10.003046000 | -2.970326000 |
| 6  | 8.674149000  | 10.549470000 | -1.316756000 |
| 1  | 8.904891000  | 9.518584000  | -1.082495000 |
| 6  | 10.259281000 | 9.930458000  | 1.095416000  |
| 6  | 11.500382000 | 9.256233000  | 1.149506000  |
| 6  | 11.587653000 | 7.931045000  | 1.586447000  |
| 1  | 12.543084000 | 7.422046000  | 1.611413000  |
| 1  | 12.404150000 | 9.758112000  | 0.826026000  |
| 6  | 9.103064000  | 9.231958000  | 1.505588000  |
| 1  | 8.148529000  | 9.741727000  | 1.521767000  |
| 6  | 9.178092000  | 7.910972000  | 1.952479000  |
| 1  | 8.285870000  | 7.392632000  | 2.281482000  |
| 6  | 10.421373000 | 7.281817000  | 1.980656000  |
| 17 | 10.526425000 | 5.546581000  | 2.564587000  |
| 8  | 8.906219000  | 12.302875000 | 2.199720000  |
| 1  | 8.569559000  | 12.931995000 | 1.527965000  |

<sup>5</sup>P<sub>OH,2OH</sub>;

|    |             |              |              |
|----|-------------|--------------|--------------|
| 26 | 7.483384000 | 13.019809000 | 3.816641000  |
| 17 | 6.819892000 | 11.065878000 | 2.312741000  |
| 6  | 4.458648000 | 8.855221000  | 5.472981000  |
| 1  | 5.426537000 | 9.361015000  | 5.567584000  |
| 1  | 4.371907000 | 8.470734000  | 4.448883000  |
| 1  | 4.460459000 | 7.997945000  | 6.156697000  |
| 6  | 1.948441000 | 9.056576000  | 5.668591000  |
| 1  | 1.913432000 | 8.203864000  | 6.356582000  |
| 1  | 1.814507000 | 8.673189000  | 4.649310000  |
| 1  | 1.099748000 | 9.712438000  | 5.900579000  |
| 6  | 3.445657000 | 10.329450000 | 7.255729000  |
| 1  | 4.378083000 | 10.891750000 | 7.378895000  |
| 1  | 3.464558000 | 9.488835000  | 7.959957000  |
| 1  | 2.610510000 | 10.983016000 | 7.536257000  |
| 6  | 3.291397000 | 9.810936000  | 5.809321000  |
| 6  | 3.263887000 | 10.993445000 | 4.791896000  |
| 1  | 3.121052000 | 10.577475000 | 3.787851000  |
| 1  | 2.394741000 | 11.627004000 | 4.993875000  |
| 6  | 4.668583000 | 13.017861000 | 5.374213000  |
| 6  | 3.661048000 | 13.675567000 | 6.126840000  |
| 1  | 2.679152000 | 13.236768000 | 6.228958000  |
| 6  | 3.953040000 | 14.886213000 | 6.734776000  |
| 1  | 3.184440000 | 15.401168000 | 7.301239000  |
| 6  | 5.240566000 | 15.436662000 | 6.633747000  |
| 1  | 5.495092000 | 16.365628000 | 7.129366000  |
| 6  | 6.199446000 | 14.745881000 | 5.897149000  |
| 6  | 7.639156000 | 15.229370000 | 5.920947000  |
| 1  | 7.652634000 | 16.326858000 | 5.954241000  |
| 1  | 8.075688000 | 14.881438000 | 6.862890000  |
| 6  | 8.669376000 | 15.746781000 | 3.726680000  |
| 1  | 9.466633000 | 15.388837000 | 3.066163000  |
| 1  | 8.983498000 | 16.719827000 | 4.129804000  |
| 6  | 7.410268000 | 15.914247000 | 2.910927000  |
| 6  | 6.953302000 | 17.180988000 | 2.572263000  |
| 1  | 7.467822000 | 18.061279000 | 2.936424000  |
| 6  | 5.813876000 | 17.284675000 | 1.756138000  |
| 1  | 5.423846000 | 18.259094000 | 1.482593000  |
| 6  | 5.189315000 | 16.139385000 | 1.299167000  |
| 1  | 4.314295000 | 16.208751000 | 0.669543000  |
| 6  | 5.702574000 | 14.861373000 | 1.667105000  |
| 6  | 3.976452000 | 13.728627000 | 0.290015000  |
| 1  | 4.206206000 | 14.370082000 | -0.573048000 |

|    |              |              |              |
|----|--------------|--------------|--------------|
| 1  | 3.108462000  | 14.171626000 | 0.800985000  |
| 6  | 3.568706000  | 12.333078000 | -0.248943000 |
| 6  | 2.354057000  | 12.556207000 | -1.183006000 |
| 1  | 2.019541000  | 11.600617000 | -1.602345000 |
| 1  | 2.611234000  | 13.220238000 | -2.017343000 |
| 1  | 1.511811000  | 13.000284000 | -0.638028000 |
| 6  | 3.148451000  | 11.395126000 | 0.905693000  |
| 1  | 3.984351000  | 11.182356000 | 1.579593000  |
| 1  | 2.793432000  | 10.438903000 | 0.503146000  |
| 1  | 2.333932000  | 11.840043000 | 1.490671000  |
| 6  | 4.722573000  | 11.700782000 | -1.061501000 |
| 1  | 5.601481000  | 11.503143000 | -0.439406000 |
| 1  | 5.026656000  | 12.358840000 | -1.884670000 |
| 1  | 4.398637000  | 10.746349000 | -1.493662000 |
| 6  | 9.818139000  | 14.185304000 | 5.271591000  |
| 1  | 10.250481000 | 14.824481000 | 6.052271000  |
| 1  | 10.490158000 | 14.205848000 | 4.411177000  |
| 6  | 9.695743000  | 12.687803000 | 5.717799000  |
| 6  | 9.188735000  | 12.544000000 | 7.179601000  |
| 6  | 8.110745000  | 11.690495000 | 7.460608000  |
| 1  | 7.640398000  | 11.174245000 | 6.633890000  |
| 6  | 7.654457000  | 11.516392000 | 8.773664000  |
| 1  | 6.819512000  | 10.849517000 | 8.968385000  |
| 6  | 8.269348000  | 12.196390000 | 9.831554000  |
| 1  | 7.915656000  | 12.064415000 | 10.849345000 |
| 6  | 9.350802000  | 13.046263000 | 9.564590000  |
| 1  | 9.841164000  | 13.575345000 | 10.376232000 |
| 6  | 9.808763000  | 13.213374000 | 8.252158000  |
| 1  | 10.660541000 | 13.862423000 | 8.075098000  |
| 6  | 11.088795000 | 12.013777000 | 5.628275000  |
| 6  | 12.282265000 | 12.686888000 | 5.945917000  |
| 1  | 12.266464000 | 13.728044000 | 6.250926000  |
| 6  | 13.518417000 | 12.030597000 | 5.869420000  |
| 1  | 14.428049000 | 12.570210000 | 6.115290000  |
| 6  | 13.581940000 | 10.687984000 | 5.478612000  |
| 1  | 14.538664000 | 10.178027000 | 5.423849000  |
| 6  | 12.397466000 | 10.008968000 | 5.160039000  |
| 1  | 12.433837000 | 8.967935000  | 4.853142000  |
| 6  | 11.164776000 | 10.667618000 | 5.232326000  |
| 1  | 10.246253000 | 10.156528000 | 4.971883000  |
| 7  | 4.473981000  | 11.818096000 | 4.752794000  |
| 1  | 5.245405000  | 11.464503000 | 4.196080000  |
| 7  | 5.914932000  | 13.583901000 | 5.246292000  |
| 7  | 8.506488000  | 14.739049000 | 4.811334000  |
| 7  | 6.796787000  | 14.763468000 | 2.496172000  |
| 7  | 5.128977000  | 13.718394000 | 1.202344000  |
| 1  | 5.558929000  | 12.833320000 | 1.455268000  |
| 8  | 8.801579000  | 12.045721000 | 4.815741000  |
| 6  | 10.472422000 | 10.837164000 | 0.035693000  |
| 6  | 11.966398000 | 11.210773000 | 0.088318000  |
| 6  | 12.713856000 | 11.444409000 | -1.076601000 |
| 6  | 14.086283000 | 11.718730000 | -1.008887000 |
| 6  | 14.695208000 | 11.757752000 | 0.240993000  |
| 6  | 13.986180000 | 11.531568000 | 1.417686000  |
| 6  | 12.617452000 | 11.254899000 | 1.332250000  |
| 1  | 14.478389000 | 11.566426000 | 2.381929000  |
| 17 | 16.493231000 | 12.122825000 | 0.341796000  |
| 1  | 14.656287000 | 11.901419000 | -1.911380000 |
| 1  | 12.234594000 | 11.428685000 | -2.048759000 |
| 1  | 12.051208000 | 11.077126000 | 2.237186000  |
| 6  | 9.727858000  | 11.528166000 | -1.123038000 |
| 6  | 9.858589000  | 12.924709000 | -1.257747000 |
| 1  | 10.520247000 | 13.467440000 | -0.592611000 |
| 6  | 9.148932000  | 13.629072000 | -2.233056000 |
| 1  | 9.260858000  | 14.701645000 | -2.331998000 |
| 6  | 8.294032000  | 12.919016000 | -3.074609000 |
| 17 | 7.358977000  | 13.832390000 | -4.363365000 |
| 6  | 8.125450000  | 11.544423000 | -2.966158000 |
| 1  | 7.450392000  | 11.013220000 | -3.625370000 |
| 6  | 8.845682000  | 10.853968000 | -1.979907000 |
| 1  | 8.706193000  | 9.784166000  | -1.892633000 |
| 6  | 10.365647000 | 9.294990000  | 0.009098000  |
| 6  | 10.885078000 | 8.558246000  | -1.071458000 |
| 6  | 10.823506000 | 7.161593000  | -1.090544000 |
| 1  | 11.223746000 | 6.603126000  | -1.927610000 |

|    |              |              |              |
|----|--------------|--------------|--------------|
| 1  | 11.347066000 | 9.067896000  | -1.909461000 |
| 6  | 9.796775000  | 8.598190000  | 1.084566000  |
| 1  | 9.410802000  | 9.143630000  | 1.935633000  |
| 6  | 9.727560000  | 7.198062000  | 1.082900000  |
| 1  | 9.284576000  | 6.669561000  | 1.917989000  |
| 6  | 10.241135000 | 6.506596000  | -0.007623000 |
| 17 | 10.156515000 | 4.672563000  | -0.021965000 |
| 8  | 9.913161000  | 11.360871000 | 1.284195000  |
| 1  | 8.937745000  | 11.216760000 | 1.340110000  |

<sup>5</sup>TS<sub>Cl,2OH</sub>:

|    |             |              |              |
|----|-------------|--------------|--------------|
| 26 | 7.561885000 | 13.703107000 | 3.818111000  |
| 17 | 7.379648000 | 11.034907000 | 1.961217000  |
| 6  | 5.777792000 | 8.313586000  | 5.036806000  |
| 1  | 6.542280000 | 9.044384000  | 5.325794000  |
| 1  | 5.907867000 | 8.081409000  | 3.971885000  |
| 1  | 5.959410000 | 7.395487000  | 5.608164000  |
| 6  | 3.311585000 | 7.783164000  | 4.915439000  |
| 1  | 3.455740000 | 6.866512000  | 5.499161000  |
| 1  | 3.398450000 | 7.523524000  | 3.852841000  |
| 1  | 2.290078000 | 8.141138000  | 5.096256000  |
| 6  | 4.212553000 | 9.177482000  | 6.819472000  |
| 1  | 4.915700000 | 9.960410000  | 7.124303000  |
| 1  | 4.418943000 | 8.285519000  | 7.423533000  |
| 1  | 3.196672000 | 9.515596000  | 7.058025000  |
| 6  | 4.355785000 | 8.851098000  | 5.317046000  |
| 6  | 4.084420000 | 10.113348000 | 4.441333000  |
| 1  | 4.149892000 | 9.815824000  | 3.388021000  |
| 1  | 3.057419000 | 10.455168000 | 4.604316000  |
| 6  | 4.795094000 | 12.351653000 | 5.402583000  |
| 6  | 3.595855000 | 12.584033000 | 6.124571000  |
| 1  | 2.780247000 | 11.876127000 | 6.083537000  |
| 6  | 3.490169000 | 13.730785000 | 6.897865000  |
| 1  | 2.575195000 | 13.925134000 | 7.447768000  |
| 6  | 4.567467000 | 14.626269000 | 6.983493000  |
| 1  | 4.513544000 | 15.511750000 | 7.605151000  |
| 6  | 5.722528000 | 14.345167000 | 6.254457000  |
| 6  | 6.960941000 | 15.202863000 | 6.440273000  |
| 1  | 6.668036000 | 16.183009000 | 6.843627000  |
| 1  | 7.576578000 | 14.716973000 | 7.202526000  |
| 6  | 7.404175000 | 16.541246000 | 4.407248000  |
| 1  | 8.155758000 | 16.633321000 | 3.617494000  |
| 1  | 7.388863000 | 17.466119000 | 5.002719000  |
| 6  | 6.057349000 | 16.336493000 | 3.745630000  |
| 6  | 5.116912000 | 17.363936000 | 3.724264000  |
| 1  | 5.317278000 | 18.296295000 | 4.237760000  |
| 6  | 3.912929000 | 17.154886000 | 3.034702000  |
| 1  | 3.151188000 | 17.927194000 | 3.017005000  |
| 6  | 3.693368000 | 15.955024000 | 2.376752000  |
| 1  | 2.764528000 | 15.780470000 | 1.852394000  |
| 6  | 4.698641000 | 14.949837000 | 2.414521000  |
| 6  | 3.427969000 | 13.523064000 | 0.818185000  |
| 1  | 3.263794000 | 14.424339000 | 0.211992000  |
| 1  | 2.505193000 | 13.347324000 | 1.392871000  |
| 6  | 3.636378000 | 12.332331000 | -0.153679000 |
| 6  | 2.397561000 | 12.293461000 | -1.081872000 |
| 1  | 2.477163000 | 11.457581000 | -1.786182000 |
| 1  | 2.309425000 | 13.219430000 | -1.663089000 |
| 1  | 1.474422000 | 12.162106000 | -0.503909000 |
| 6  | 3.723242000 | 10.997125000 | 0.619826000  |
| 1  | 4.596608000 | 10.961057000 | 1.278556000  |
| 1  | 3.807344000 | 10.158282000 | -0.081565000 |
| 1  | 2.823549000 | 10.841565000 | 1.227788000  |
| 6  | 4.905819000 | 12.543085000 | -1.010992000 |
| 1  | 5.814216000 | 12.557158000 | -0.399633000 |
| 1  | 4.851475000 | 13.489709000 | -1.562700000 |
| 1  | 5.005914000 | 11.731996000 | -1.742436000 |
| 6  | 9.271630000 | 15.292384000 | 5.487266000  |
| 1  | 9.563652000 | 15.955317000 | 6.313888000  |
| 1  | 9.747754000 | 15.652886000 | 4.577319000  |
| 6  | 9.768967000 | 13.805999000 | 5.735376000  |
| 6  | 9.661237000 | 13.419206000 | 7.232384000  |
| 6  | 9.129487000 | 12.167103000 | 7.582043000  |
| 1  | 8.791537000 | 11.525900000 | 6.777851000  |
| 6  | 9.030303000 | 11.770266000 | 8.921308000  |

|    |              |              |              |
|----|--------------|--------------|--------------|
| 1  | 8.613137000  | 10.797354000 | 9.165571000  |
| 6  | 9.465881000  | 12.621728000 | 9.944251000  |
| 1  | 9.387488000  | 12.318053000 | 10.983709000 |
| 6  | 10.008390000 | 13.869747000 | 9.611834000  |
| 1  | 10.356678000 | 14.537863000 | 10.394103000 |
| 6  | 10.108194000 | 14.261232000 | 8.270559000  |
| 1  | 10.549392000 | 15.226107000 | 8.039720000  |
| 6  | 11.252427000 | 13.743276000 | 5.256421000  |
| 6  | 12.331707000 | 13.384755000 | 6.080407000  |
| 1  | 12.165119000 | 13.162362000 | 7.127417000  |
| 6  | 13.637953000 | 13.308893000 | 5.571004000  |
| 1  | 14.454253000 | 13.030256000 | 6.231388000  |
| 6  | 13.888899000 | 13.590673000 | 4.225107000  |
| 1  | 14.900035000 | 13.539899000 | 3.831896000  |
| 6  | 12.817192000 | 13.939418000 | 3.388882000  |
| 1  | 12.997243000 | 14.154013000 | 2.338752000  |
| 6  | 11.515565000 | 14.008064000 | 3.894456000  |
| 1  | 10.685184000 | 14.255703000 | 3.236291000  |
| 7  | 5.004704000  | 11.233882000 | 4.638415000  |
| 1  | 5.904533000  | 11.170927000 | 4.181006000  |
| 7  | 5.821793000  | 13.254848000 | 5.447380000  |
| 7  | 7.805291000  | 15.372080000 | 5.228608000  |
| 7  | 5.853645000  | 15.137591000 | 3.125019000  |
| 7  | 4.552515000  | 13.776072000 | 1.727043000  |
| 1  | 5.277937000  | 13.079837000 | 1.833918000  |
| 8  | 8.997501000  | 12.902828000 | 4.938218000  |
| 6  | 9.123356000  | 10.042731000 | 0.988169000  |
| 6  | 10.027994000 | 9.835791000  | 2.165326000  |
| 6  | 11.335901000 | 10.355890000 | 2.174949000  |
| 6  | 12.203652000 | 10.104893000 | 3.244569000  |
| 6  | 11.747680000 | 9.335615000  | 4.307989000  |
| 6  | 10.453824000 | 8.812535000  | 4.344121000  |
| 6  | 9.602074000  | 9.065310000  | 3.271143000  |
| 1  | 10.116261000 | 8.227922000  | 5.190392000  |
| 17 | 12.873032000 | 8.997585000  | 5.707872000  |
| 1  | 13.204951000 | 10.514947000 | 3.243322000  |
| 1  | 11.694898000 | 10.946787000 | 1.343166000  |
| 1  | 8.588922000  | 8.683756000  | 3.301365000  |
| 6  | 9.560689000  | 11.065979000 | -0.029189000 |
| 6  | 9.682853000  | 12.435234000 | 0.288300000  |
| 1  | 9.356947000  | 12.840549000 | 1.244967000  |
| 6  | 10.172646000 | 13.341465000 | -0.655746000 |
| 1  | 10.244809000 | 14.392156000 | -0.403742000 |
| 6  | 10.549907000 | 12.874218000 | -1.912979000 |
| 17 | 11.192180000 | 14.064016000 | -3.148392000 |
| 6  | 10.448342000 | 11.531948000 | -2.261164000 |
| 1  | 10.749161000 | 11.185702000 | -3.241809000 |
| 6  | 9.946126000  | 10.631523000 | -1.314672000 |
| 1  | 9.879337000  | 9.584392000  | -1.581216000 |
| 6  | 8.473540000  | 8.813815000  | 0.411918000  |
| 6  | 8.988491000  | 7.527213000  | 0.660589000  |
| 6  | 8.419680000  | 6.394958000  | 0.063452000  |
| 1  | 8.828751000  | 5.411399000  | 0.256245000  |
| 1  | 9.850615000  | 7.395840000  | 1.300753000  |
| 6  | 7.374912000  | 8.939434000  | -0.466413000 |
| 1  | 6.959184000  | 9.919264000  | -0.665671000 |
| 6  | 6.793611000  | 7.820397000  | -1.059402000 |
| 1  | 5.942978000  | 7.926356000  | -1.720667000 |
| 6  | 7.328713000  | 6.561633000  | -0.780831000 |
| 17 | 6.572607000  | 5.089404000  | -1.557242000 |
| 8  | 8.655839000  | 14.564975000 | 2.408265000  |
| 1  | 8.154922000  | 14.889273000 | 1.631778000  |

<sup>5</sup>P<sub>Cl,2OH</sub>:

|    |              |              |             |
|----|--------------|--------------|-------------|
| 26 | 6.669633000  | 12.736805000 | 3.839816000 |
| 17 | 7.756123000  | 4.822434000  | 4.688417000 |
| 6  | 2.591359000  | 9.509128000  | 2.853492000 |
| 1  | 3.629530000  | 9.588403000  | 3.195378000 |
| 1  | 2.550270000  | 9.840787000  | 1.808088000 |
| 1  | 2.303096000  | 8.451394000  | 2.884317000 |
| 6  | 0.200290000  | 10.241859000 | 3.209543000 |
| 1  | -0.138298000 | 9.199262000  | 3.230758000 |
| 1  | 0.129862000  | 10.598208000 | 2.174117000 |
| 1  | -0.492307000 | 10.833874000 | 3.821322000 |
| 6  | 1.707549000  | 9.842181000  | 5.196047000 |

|   |              |              |              |
|---|--------------|--------------|--------------|
| 1 | 2.717770000  | 9.940277000  | 5.608687000  |
| 1 | 1.426500000  | 8.782723000  | 5.240062000  |
| 1 | 1.016681000  | 10.399246000 | 5.841268000  |
| 6 | 1.648304000  | 10.353533000 | 3.740191000  |
| 6 | 2.059550000  | 11.856857000 | 3.665631000  |
| 1 | 1.960127000  | 12.183267000 | 2.622210000  |
| 1 | 1.349563000  | 12.453412000 | 4.248331000  |
| 6 | 3.808694000  | 12.697793000 | 5.271185000  |
| 6 | 2.904697000  | 13.060105000 | 6.309064000  |
| 1 | 1.844754000  | 12.880702000 | 6.197946000  |
| 6 | 3.395786000  | 13.645742000 | 7.464815000  |
| 1 | 2.707829000  | 13.936060000 | 8.252232000  |
| 6 | 4.776629000  | 13.856492000 | 7.624907000  |
| 1 | 5.178740000  | 14.299329000 | 8.527954000  |
| 6 | 5.623977000  | 13.455083000 | 6.595728000  |
| 6 | 7.126490000  | 13.490453000 | 6.776915000  |
| 1 | 7.393226000  | 14.248174000 | 7.527869000  |
| 1 | 7.426830000  | 12.520247000 | 7.181639000  |
| 6 | 8.063508000  | 15.147256000 | 5.192738000  |
| 1 | 8.993223000  | 15.252507000 | 4.621442000  |
| 1 | 8.187277000  | 15.743477000 | 6.107983000  |
| 6 | 6.957272000  | 15.744196000 | 4.347166000  |
| 6 | 6.652637000  | 17.098182000 | 4.467373000  |
| 1 | 7.115988000  | 17.696606000 | 5.242534000  |
| 6 | 5.750789000  | 17.661933000 | 3.549246000  |
| 1 | 5.489249000  | 18.712918000 | 3.617738000  |
| 6 | 5.192686000  | 16.876784000 | 2.554315000  |
| 1 | 4.492234000  | 17.300072000 | 1.847652000  |
| 6 | 5.523582000  | 15.492411000 | 2.485486000  |
| 6 | 4.193218000  | 15.157393000 | 0.424900000  |
| 1 | 4.668952000  | 16.049801000 | -0.007947000 |
| 1 | 3.198499000  | 15.470181000 | 0.784216000  |
| 6 | 3.999234000  | 14.119724000 | -0.713711000 |
| 6 | 3.224793000  | 14.830145000 | -1.849560000 |
| 1 | 3.035953000  | 14.133759000 | -2.674693000 |
| 1 | 3.794370000  | 15.679713000 | -2.246128000 |
| 1 | 2.256283000  | 15.203588000 | -1.493936000 |
| 6 | 3.173237000  | 12.908449000 | -0.219547000 |
| 1 | 3.691735000  | 12.370408000 | 0.580493000  |
| 1 | 2.998935000  | 12.206964000 | -1.044827000 |
| 1 | 2.194909000  | 13.233618000 | 0.157415000  |
| 6 | 5.368622000  | 13.640401000 | -1.249191000 |
| 1 | 5.932865000  | 13.104030000 | -0.478989000 |
| 1 | 5.975246000  | 14.488951000 | -1.589589000 |
| 1 | 5.226928000  | 12.962634000 | -2.099794000 |
| 6 | 9.206864000  | 12.967865000 | 5.500742000  |
| 1 | 9.757061000  | 13.102664000 | 6.442418000  |
| 1 | 9.800953000  | 13.419652000 | 4.704420000  |
| 6 | 9.046647000  | 11.449463000 | 5.122281000  |
| 6 | 8.667306000  | 10.554954000 | 6.329134000  |
| 6 | 7.733752000  | 9.520253000  | 6.142775000  |
| 1 | 7.272668000  | 9.416975000  | 5.169271000  |
| 6 | 7.388219000  | 8.657457000  | 7.189820000  |
| 1 | 6.667389000  | 7.864087000  | 7.016291000  |
| 6 | 7.964885000  | 8.816337000  | 8.456054000  |
| 1 | 7.696912000  | 8.150022000  | 9.269854000  |
| 6 | 8.886555000  | 9.849023000  | 8.662346000  |
| 1 | 9.335626000  | 9.991752000  | 9.640541000  |
| 6 | 9.233805000  | 10.707834000 | 7.610611000  |
| 1 | 9.945146000  | 11.503188000 | 7.807798000  |
| 6 | 10.417276000 | 11.004833000 | 4.525384000  |
| 6 | 11.506038000 | 10.587015000 | 5.310200000  |
| 1 | 11.404927000 | 10.499440000 | 6.384984000  |
| 6 | 12.734996000 | 10.258735000 | 4.720542000  |
| 1 | 13.561009000 | 9.938519000  | 5.348617000  |
| 6 | 12.898111000 | 10.338726000 | 3.332728000  |
| 1 | 13.850319000 | 10.085933000 | 2.876361000  |
| 6 | 11.818220000 | 10.749888000 | 2.539830000  |
| 1 | 11.928378000 | 10.812495000 | 1.461107000  |
| 6 | 10.594480000 | 11.081192000 | 3.131677000  |
| 1 | 9.752690000  | 11.390666000 | 2.525497000  |
| 7 | 3.429243000  | 12.150274000 | 4.084203000  |
| 1 | 4.175057000  | 12.017645000 | 3.373014000  |
| 7 | 5.158954000  | 12.907320000 | 5.442130000  |
| 7 | 7.902430000  | 13.704172000 | 5.520999000  |

|    |              |              |              |
|----|--------------|--------------|--------------|
| 7  | 6.395692000  | 14.943549000 | 3.403014000  |
| 7  | 5.017760000  | 14.669842000 | 1.531395000  |
| 1  | 5.196270000  | 13.650325000 | 1.654453000  |
| 8  | 8.042811000  | 11.368223000 | 4.112406000  |
| 6  | 9.079577000  | 4.965196000  | 3.102725000  |
| 6  | 8.592021000  | 6.181405000  | 2.335824000  |
| 6  | 8.338536000  | 6.115593000  | 0.954631000  |
| 6  | 7.937840000  | 7.253622000  | 0.242025000  |
| 6  | 7.797485000  | 8.452717000  | 0.929019000  |
| 6  | 8.044025000  | 8.568920000  | 2.296088000  |
| 6  | 8.440376000  | 7.422199000  | 2.988548000  |
| 1  | 7.952996000  | 9.520110000  | 2.817855000  |
| 17 | 7.272298000  | 9.943071000  | -0.007731000 |
| 1  | 7.745974000  | 7.193889000  | -0.821891000 |
| 1  | 8.460929000  | 5.185156000  | 0.416348000  |
| 1  | 8.623006000  | 7.495451000  | 4.053985000  |
| 6  | 8.915990000  | 3.646389000  | 2.362943000  |
| 6  | 7.636186000  | 3.159841000  | 2.028635000  |
| 1  | 6.754826000  | 3.695851000  | 2.357906000  |
| 6  | 7.480478000  | 1.982402000  | 1.295876000  |
| 1  | 6.492450000  | 1.611895000  | 1.053468000  |
| 6  | 8.621642000  | 1.292968000  | 0.887319000  |
| 17 | 8.425453000  | -0.254486000 | -0.071041000 |
| 6  | 9.901079000  | 1.745207000  | 1.185273000  |
| 1  | 10.775560000 | 1.199843000  | 0.853633000  |
| 6  | 10.041773000 | 2.925862000  | 1.926865000  |
| 1  | 11.039206000 | 3.281453000  | 2.149533000  |
| 6  | 10.428697000 | 5.133756000  | 3.781467000  |
| 6  | 11.298591000 | 6.180135000  | 3.430474000  |
| 6  | 12.561012000 | 6.301108000  | 4.027631000  |
| 1  | 13.216195000 | 7.118372000  | 3.754576000  |
| 1  | 11.009336000 | 6.909290000  | 2.685662000  |
| 6  | 10.858916000 | 4.196308000  | 4.743532000  |
| 1  | 10.201978000 | 3.386064000  | 5.035443000  |
| 6  | 12.111524000 | 4.304486000  | 5.347321000  |
| 1  | 12.428267000 | 3.584484000  | 6.091268000  |
| 6  | 12.942511000 | 5.362072000  | 4.976969000  |
| 17 | 14.585888000 | 5.514527000  | 5.770107000  |
| 8  | 5.527835000  | 12.144794000 | 2.308915000  |
| 1  | 5.831400000  | 11.411333000 | 1.742370000  |



Data for 1<sub>Cl,NS</sub>:

<sup>5</sup>Re<sub>1Cl,NS</sub>:

|    |              |              |              |
|----|--------------|--------------|--------------|
| 26 | 7.064320000  | 13.530199000 | 4.337821000  |
| 17 | 9.202496000  | 13.926783000 | 2.993466000  |
| 8  | 7.063152000  | 11.662166000 | 3.819830000  |
| 1  | 7.925031000  | 11.269891000 | 3.584463000  |
| 6  | 4.415721000  | 12.245409000 | 5.696136000  |
| 6  | 3.218300000  | 12.307893000 | 6.458505000  |
| 1  | 2.707360000  | 11.386338000 | 6.712060000  |
| 6  | 2.737998000  | 13.536381000 | 6.872341000  |
| 1  | 1.828962000  | 13.594039000 | 7.461295000  |
| 6  | 3.437206000  | 14.708361000 | 6.536908000  |
| 1  | 3.091449000  | 15.680713000 | 6.865833000  |
| 6  | 4.594538000  | 14.599070000 | 5.772770000  |
| 6  | 5.310130000  | 15.865709000 | 5.351953000  |
| 1  | 4.717533000  | 16.333921000 | 4.557937000  |
| 1  | 5.316440000  | 16.568523000 | 6.191899000  |
| 6  | 6.872437000  | 16.419502000 | 3.534721000  |
| 1  | 7.933515000  | 16.381715000 | 3.272172000  |
| 1  | 6.575168000  | 17.471665000 | 3.626167000  |
| 6  | 6.074355000  | 15.725730000 | 2.458430000  |
| 6  | 5.454660000  | 16.416503000 | 1.427398000  |
| 1  | 5.492461000  | 17.497966000 | 1.391669000  |
| 6  | 4.781006000  | 15.673152000 | 0.436692000  |
| 1  | 4.285742000  | 16.183890000 | -0.381950000 |
| 6  | 4.751240000  | 14.292875000 | 0.506816000  |
| 1  | 4.245971000  | 13.700637000 | -0.247097000 |
| 6  | 5.401925000  | 13.632754000 | 1.586510000  |
| 6  | 7.789094000  | 16.014081000 | 5.813238000  |
| 1  | 7.570625000  | 16.951932000 | 6.337081000  |
| 1  | 8.699929000  | 16.158288000 | 5.229995000  |
| 6  | 8.064635000  | 14.825486000 | 6.790049000  |
| 6  | 7.107255000  | 14.744177000 | 8.001622000  |
| 6  | 6.765938000  | 13.477986000 | 8.508649000  |
| 1  | 7.130727000  | 12.597641000 | 7.994298000  |
| 6  | 5.962164000  | 13.352929000 | 9.646313000  |
| 1  | 5.709926000  | 12.365095000 | 10.019734000 |
| 6  | 5.483196000  | 14.494484000 | 10.302402000 |
| 1  | 4.858146000  | 14.398825000 | 11.184536000 |
| 6  | 5.820271000  | 15.759900000 | 9.810267000  |
| 1  | 5.457737000  | 16.653526000 | 10.308881000 |
| 6  | 6.627866000  | 15.883666000 | 8.671542000  |
| 1  | 6.875930000  | 16.879922000 | 8.321382000  |
| 6  | 9.516896000  | 14.953382000 | 7.313761000  |
| 6  | 9.935704000  | 16.094234000 | 8.022296000  |
| 1  | 9.237163000  | 16.896888000 | 8.233902000  |
| 6  | 11.254553000 | 16.206779000 | 8.478001000  |
| 1  | 11.559981000 | 17.094010000 | 9.024234000  |
| 6  | 12.174079000 | 15.176987000 | 8.238126000  |
| 1  | 13.196514000 | 15.263662000 | 8.591336000  |
| 6  | 11.761904000 | 14.037015000 | 7.538124000  |
| 1  | 12.465288000 | 13.232181000 | 7.347258000  |
| 6  | 10.443614000 | 13.927039000 | 7.077676000  |
| 1  | 10.118801000 | 13.052783000 | 6.528632000  |
| 7  | 4.937372000  | 11.058348000 | 5.306206000  |
| 1  | 5.803811000  | 11.040476000 | 4.747592000  |
| 7  | 5.074512000  | 13.399863000 | 5.341016000  |
| 7  | 6.704212000  | 15.690451000 | 4.832771000  |
| 7  | 6.036860000  | 14.364708000 | 2.554475000  |
| 7  | 5.423135000  | 12.282869000 | 1.694868000  |
| 1  | 5.995230000  | 11.847378000 | 2.432031000  |
| 8  | 7.943092000  | 13.628723000 | 6.005154000  |
| 1  | 4.965738000  | 11.713045000 | 1.001970000  |
| 1  | 4.467656000  | 10.202268000 | 5.551998000  |
| 6  | 13.909271000 | 16.276825000 | 4.074278000  |
| 6  | 14.814161000 | 16.682390000 | 5.152837000  |
| 6  | 15.479776000 | 15.722131000 | 5.959952000  |
| 6  | 15.061616000 | 18.052424000 | 5.432050000  |
| 6  | 15.926076000 | 18.445726000 | 6.454181000  |
| 6  | 16.553053000 | 17.462785000 | 7.218357000  |
| 6  | 16.342347000 | 16.103924000 | 6.988450000  |
| 1  | 16.831275000 | 15.356971000 | 7.601729000  |
| 17 | 17.687777000 | 17.972005000 | 8.565050000  |
| 1  | 16.113201000 | 19.495816000 | 6.642167000  |
| 1  | 14.589617000 | 18.815363000 | 4.824609000  |

|    |              |              |             |
|----|--------------|--------------|-------------|
| 1  | 15.299515000 | 14.666925000 | 5.793195000 |
| 1  | 16.327731000 | 15.198213000 | 3.389646000 |
| 6  | 15.486480000 | 14.604936000 | 3.051143000 |
| 6  | 14.164258000 | 15.045511000 | 3.320243000 |
| 6  | 15.733451000 | 13.435952000 | 2.330239000 |
| 1  | 16.748883000 | 13.122275000 | 2.121521000 |
| 6  | 14.648741000 | 12.688531000 | 1.873956000 |
| 17 | 14.966527000 | 11.148350000 | 0.930406000 |
| 6  | 13.331664000 | 13.076295000 | 2.113536000 |
| 1  | 12.502300000 | 12.475471000 | 1.761038000 |
| 6  | 13.095239000 | 14.250796000 | 2.829705000 |
| 1  | 12.068661000 | 14.534992000 | 3.032500000 |
| 6  | 12.748444000 | 17.109912000 | 3.740935000 |
| 6  | 12.031555000 | 17.810284000 | 4.745443000 |
| 1  | 12.319845000 | 17.699735000 | 5.784079000 |
| 6  | 12.303504000 | 17.249733000 | 2.401053000 |
| 1  | 12.834385000 | 16.740427000 | 1.605606000 |
| 6  | 11.211701000 | 18.055579000 | 2.074688000 |
| 1  | 10.896340000 | 18.163402000 | 1.044248000 |
| 6  | 10.545644000 | 18.727733000 | 3.098079000 |
| 6  | 10.934145000 | 18.614062000 | 4.432125000 |
| 1  | 10.391764000 | 19.132472000 | 5.213194000 |
| 17 | 9.114985000  | 19.796831000 | 2.677145000 |

<sup>5</sup>TS<sub>OH,1Cl,NS</sub>:

|    |              |              |              |
|----|--------------|--------------|--------------|
| 26 | 8.188437000  | 15.434840000 | 4.925572000  |
| 17 | 9.123631000  | 18.313541000 | 4.396644000  |
| 8  | 10.063809000 | 15.290111000 | 3.904165000  |
| 1  | 10.201507000 | 16.261343000 | 4.014915000  |
| 6  | 8.321350000  | 12.271480000 | 4.888034000  |
| 6  | 7.838782000  | 10.960152000 | 5.121377000  |
| 1  | 8.491158000  | 10.109770000 | 4.960188000  |
| 6  | 6.536190000  | 10.798306000 | 5.570382000  |
| 1  | 6.151051000  | 9.802168000  | 5.761428000  |
| 6  | 5.721784000  | 11.921206000 | 5.792933000  |
| 1  | 4.711836000  | 11.814167000 | 6.170243000  |
| 6  | 6.245582000  | 13.186254000 | 5.528081000  |
| 6  | 5.377407000  | 14.418363000 | 5.714993000  |
| 1  | 4.666737000  | 14.455777000 | 4.880089000  |
| 1  | 4.779235000  | 14.294621000 | 6.626250000  |
| 6  | 5.495086000  | 16.716591000 | 4.824521000  |
| 1  | 5.995516000  | 17.673898000 | 5.003787000  |
| 1  | 4.420857000  | 16.851962000 | 5.015965000  |
| 6  | 5.725372000  | 16.322083000 | 3.385034000  |
| 6  | 4.758076000  | 16.502632000 | 2.403986000  |
| 1  | 3.780482000  | 16.890004000 | 2.663150000  |
| 6  | 5.084208000  | 16.169800000 | 1.074202000  |
| 1  | 4.349506000  | 16.297493000 | 0.286337000  |
| 6  | 6.343123000  | 15.681825000 | 0.771545000  |
| 1  | 6.619732000  | 15.427130000 | -0.245107000 |
| 6  | 7.293251000  | 15.515474000 | 1.816332000  |
| 6  | 6.340949000  | 16.282436000 | 7.118817000  |
| 1  | 5.445170000  | 16.172321000 | 7.744618000  |
| 1  | 6.519520000  | 17.351500000 | 6.986207000  |
| 6  | 7.629817000  | 15.707389000 | 7.803552000  |
| 6  | 7.414107000  | 14.338144000 | 8.500229000  |
| 6  | 8.476291000  | 13.417245000 | 8.508393000  |
| 1  | 9.377903000  | 13.677113000 | 7.968111000  |
| 6  | 8.368539000  | 12.194801000 | 9.179395000  |
| 1  | 9.204012000  | 11.500618000 | 9.171236000  |
| 6  | 7.188824000  | 11.862975000 | 9.859299000  |
| 1  | 7.102412000  | 10.914207000 | 10.379882000 |
| 6  | 6.122631000  | 12.768770000 | 9.859259000  |
| 1  | 5.200774000  | 12.525907000 | 10.379518000 |
| 6  | 6.236088000  | 13.994904000 | 9.188862000  |
| 1  | 5.390599000  | 14.674065000 | 9.214144000  |
| 6  | 8.072086000  | 16.733463000 | 8.886833000  |
| 6  | 7.245492000  | 17.083249000 | 9.970624000  |
| 1  | 6.273605000  | 16.616897000 | 10.092409000 |
| 6  | 7.665500000  | 18.026413000 | 10.916606000 |
| 1  | 7.011597000  | 18.284754000 | 11.744397000 |
| 6  | 8.923728000  | 18.631400000 | 10.800072000 |
| 1  | 9.250707000  | 19.359953000 | 11.535675000 |
| 6  | 9.753817000  | 18.286557000 | 9.726596000  |
| 1  | 10.731695000 | 18.748519000 | 9.624596000  |

|    |              |              |              |
|----|--------------|--------------|--------------|
| 6  | 9.328435000  | 17.348635000 | 8.777331000  |
| 1  | 9.951743000  | 17.078604000 | 7.934793000  |
| 7  | 9.599439000  | 12.516655000 | 4.492743000  |
| 1  | 9.914379000  | 13.474394000 | 4.334914000  |
| 7  | 7.508726000  | 13.355622000 | 5.062488000  |
| 7  | 6.104952000  | 15.720848000 | 5.754606000  |
| 7  | 6.962376000  | 15.820084000 | 3.107999000  |
| 7  | 8.551691000  | 15.061817000 | 1.587720000  |
| 1  | 9.235806000  | 15.088573000 | 2.362779000  |
| 8  | 8.637921000  | 15.605047000 | 6.804611000  |
| 1  | 8.851740000  | 14.865690000 | 0.646622000  |
| 1  | 10.243915000 | 11.756426000 | 4.356766000  |
| 6  | 12.414189000 | 15.382242000 | 3.218388000  |
| 6  | 12.764882000 | 16.214120000 | 4.377581000  |
| 6  | 12.477112000 | 15.779276000 | 5.695900000  |
| 6  | 13.444191000 | 17.444052000 | 4.206660000  |
| 6  | 13.833221000 | 18.208307000 | 5.308033000  |
| 6  | 13.527345000 | 17.744781000 | 6.585289000  |
| 6  | 12.851019000 | 16.541369000 | 6.799047000  |
| 1  | 12.608433000 | 16.214298000 | 7.801880000  |
| 17 | 14.024266000 | 18.741438000 | 8.026979000  |
| 1  | 14.366988000 | 19.139519000 | 5.169087000  |
| 1  | 13.705013000 | 17.787586000 | 3.213994000  |
| 1  | 11.909720000 | 14.869784000 | 5.840941000  |
| 1  | 14.274342000 | 14.093056000 | 4.742252000  |
| 6  | 13.708920000 | 13.425726000 | 4.105175000  |
| 6  | 12.691912000 | 13.939169000 | 3.264494000  |
| 6  | 14.039396000 | 12.069463000 | 4.091680000  |
| 1  | 14.830562000 | 11.691174000 | 4.726052000  |
| 6  | 13.341832000 | 11.218477000 | 3.237431000  |
| 17 | 13.766724000 | 9.447734000  | 3.212158000  |
| 6  | 12.325643000 | 11.680226000 | 2.397323000  |
| 1  | 11.789316000 | 10.996777000 | 1.751431000  |
| 6  | 12.008292000 | 13.036848000 | 2.412961000  |
| 1  | 11.198611000 | 13.396380000 | 1.791414000  |
| 6  | 12.216341000 | 16.023428000 | 1.910331000  |
| 6  | 11.518849000 | 17.253621000 | 1.796806000  |
| 1  | 11.051097000 | 17.705800000 | 2.665790000  |
| 6  | 12.768940000 | 15.455441000 | 0.734378000  |
| 1  | 13.348601000 | 14.543576000 | 0.791116000  |
| 6  | 12.629812000 | 16.082865000 | -0.503631000 |
| 1  | 13.072461000 | 15.650106000 | -1.391517000 |
| 6  | 11.922461000 | 17.281688000 | -0.570495000 |
| 6  | 11.363359000 | 17.877390000 | 0.560792000  |
| 1  | 10.810332000 | 18.804702000 | 0.482642000  |
| 17 | 11.727724000 | 18.100173000 | -2.186565000 |

<sup>5</sup>P<sub>OH,1Cl,NS<sup>-</sup></sub>

|    |              |              |              |
|----|--------------|--------------|--------------|
| 26 | 8.172839000  | 15.662865000 | 4.445825000  |
| 17 | 9.962293000  | 17.017842000 | 3.169616000  |
| 8  | 11.816610000 | 14.601388000 | 3.895978000  |
| 1  | 11.456825000 | 15.516152000 | 3.773011000  |
| 6  | 8.355062000  | 12.846883000 | 2.892945000  |
| 6  | 7.645717000  | 11.791208000 | 2.258771000  |
| 1  | 8.097270000  | 11.273310000 | 1.420565000  |
| 6  | 6.397387000  | 11.435018000 | 2.735900000  |
| 1  | 5.843878000  | 10.633084000 | 2.259403000  |
| 6  | 5.855872000  | 12.100335000 | 3.852875000  |
| 1  | 4.893458000  | 11.816488000 | 4.260528000  |
| 6  | 6.584671000  | 13.134139000 | 4.427413000  |
| 6  | 6.111752000  | 13.798880000 | 5.704537000  |
| 1  | 5.036205000  | 13.621184000 | 5.838858000  |
| 1  | 6.625878000  | 13.307536000 | 6.535688000  |
| 6  | 5.313064000  | 16.104398000 | 5.255417000  |
| 1  | 5.510596000  | 17.134344000 | 5.573035000  |
| 1  | 4.341669000  | 15.809650000 | 5.677583000  |
| 6  | 5.242926000  | 16.077916000 | 3.747046000  |
| 6  | 4.021562000  | 16.034332000 | 3.090224000  |
| 1  | 3.101224000  | 15.960074000 | 3.655832000  |
| 6  | 4.010435000  | 16.088852000 | 1.682834000  |
| 1  | 3.070433000  | 16.057947000 | 1.142818000  |
| 6  | 5.202960000  | 16.182795000 | 0.992458000  |
| 1  | 5.226303000  | 16.231381000 | -0.089919000 |
| 6  | 6.427996000  | 16.214245000 | 1.714538000  |
| 6  | 6.865409000  | 15.704460000 | 7.148490000  |

|                                            |              |              |              |
|--------------------------------------------|--------------|--------------|--------------|
| 1                                          | 6.245015000  | 15.260611000 | 7.938119000  |
| 1                                          | 6.718112000  | 16.785659000 | 7.184581000  |
| 6                                          | 8.400417000  | 15.457186000 | 7.375697000  |
| 6                                          | 8.737956000  | 14.017819000 | 7.844691000  |
| 6                                          | 9.901153000  | 13.400011000 | 7.352807000  |
| 1                                          | 10.488258000 | 13.926167000 | 6.610897000  |
| 6                                          | 10.279887000 | 12.124109000 | 7.785615000  |
| 1                                          | 11.182511000 | 11.669436000 | 7.388620000  |
| 6                                          | 9.498322000  | 11.432348000 | 8.719556000  |
| 1                                          | 9.789800000  | 10.441810000 | 9.054478000  |
| 6                                          | 8.332776000  | 12.029969000 | 9.211797000  |
| 1                                          | 7.710910000  | 11.503592000 | 9.929593000  |
| 6                                          | 7.957548000  | 13.309309000 | 8.779445000  |
| 1                                          | 7.043792000  | 13.738640000 | 9.176815000  |
| 6                                          | 8.870990000  | 16.472776000 | 8.456498000  |
| 6                                          | 8.429612000  | 16.413550000 | 9.790797000  |
| 1                                          | 7.770821000  | 15.616977000 | 10.117357000 |
| 6                                          | 8.843575000  | 17.370563000 | 10.726069000 |
| 1                                          | 8.491105000  | 17.305720000 | 11.751168000 |
| 6                                          | 9.709332000  | 18.403206000 | 10.345311000 |
| 1                                          | 10.032038000 | 19.142891000 | 11.071377000 |
| 6                                          | 10.154065000 | 18.470448000 | 9.019238000  |
| 1                                          | 10.823921000 | 19.267833000 | 8.710305000  |
| 6                                          | 9.735414000  | 17.515094000 | 8.084048000  |
| 1                                          | 10.068262000 | 17.555394000 | 7.054780000  |
| 7                                          | 9.607680000  | 13.186862000 | 2.482732000  |
| 1                                          | 10.224845000 | 13.781981000 | 3.028335000  |
| 7                                          | 7.794652000  | 13.537068000 | 3.931460000  |
| 7                                          | 6.414413000  | 15.257847000 | 5.792717000  |
| 7                                          | 6.438248000  | 16.155365000 | 3.082791000  |
| 7                                          | 7.612715000  | 16.298793000 | 1.057009000  |
| 1                                          | 8.479496000  | 16.445674000 | 1.564343000  |
| 8                                          | 9.058104000  | 15.740011000 | 6.146181000  |
| 1                                          | 7.629958000  | 16.348173000 | 0.051346000  |
| 1                                          | 10.016093000 | 12.713043000 | 1.692620000  |
| 6                                          | 13.287604000 | 14.582206000 | 3.936163000  |
| 6                                          | 13.761330000 | 15.821405000 | 4.723243000  |
| 6                                          | 13.051713000 | 16.197846000 | 5.879484000  |
| 6                                          | 14.881451000 | 16.576525000 | 4.344320000  |
| 6                                          | 15.295070000 | 17.682203000 | 5.100706000  |
| 6                                          | 14.569220000 | 18.021636000 | 6.236574000  |
| 6                                          | 13.448995000 | 17.299906000 | 6.642106000  |
| 1                                          | 12.892590000 | 17.584027000 | 7.526796000  |
| 17                                         | 15.100121000 | 19.469528000 | 7.231262000  |
| 1                                          | 16.159996000 | 18.260340000 | 4.800303000  |
| 1                                          | 15.443731000 | 16.315871000 | 3.456224000  |
| 1                                          | 12.172989000 | 15.641065000 | 6.182335000  |
| 1                                          | 15.370437000 | 14.065055000 | 5.713090000  |
| 6                                          | 14.762963000 | 13.189489000 | 5.517693000  |
| 6                                          | 13.653062000 | 13.275411000 | 4.663425000  |
| 6                                          | 15.104721000 | 11.980240000 | 6.138911000  |
| 1                                          | 15.962271000 | 11.923505000 | 6.797650000  |
| 6                                          | 14.315996000 | 10.861903000 | 5.895227000  |
| 17                                         | 14.750789000 | 9.272823000  | 6.705281000  |
| 6                                          | 13.204537000 | 10.908822000 | 5.056311000  |
| 1                                          | 12.604016000 | 10.024479000 | 4.881987000  |
| 6                                          | 12.880659000 | 12.122275000 | 4.440075000  |
| 1                                          | 12.016260000 | 12.171665000 | 3.790514000  |
| 6                                          | 13.825450000 | 14.572105000 | 2.487214000  |
| 6                                          | 13.112958000 | 15.231797000 | 1.471219000  |
| 1                                          | 12.175092000 | 15.726687000 | 1.693915000  |
| 6                                          | 15.033745000 | 13.936395000 | 2.155902000  |
| 1                                          | 15.601323000 | 13.412412000 | 2.915701000  |
| 6                                          | 15.527932000 | 13.957531000 | 0.845305000  |
| 1                                          | 16.459447000 | 13.462527000 | 0.600425000  |
| 6                                          | 14.793330000 | 14.620977000 | -0.131571000 |
| 6                                          | 13.590938000 | 15.260475000 | 0.156149000  |
| 1                                          | 13.033962000 | 15.770131000 | -0.620407000 |
| 17                                         | 15.426799000 | 14.650814000 | -1.854170000 |
| <b><sup>5</sup>TS<sub>Cl,1Cl,NS:</sub></b> |              |              |              |
| 26                                         | 7.326135000  | 13.122023000 | 5.249101000  |
| 17                                         | 10.667954000 | 15.379059000 | 3.308926000  |
| 8                                          | 7.922644000  | 11.196371000 | 5.230050000  |
| 1                                          | 8.820828000  | 10.980961000 | 5.543949000  |

|    |              |              |              |
|----|--------------|--------------|--------------|
| 6  | 4.757290000  | 11.759353000 | 6.445694000  |
| 6  | 3.448775000  | 11.747458000 | 6.996884000  |
| 1  | 3.060563000  | 10.833381000 | 7.431458000  |
| 6  | 2.699637000  | 12.912942000 | 6.979949000  |
| 1  | 1.701925000  | 12.919408000 | 7.406624000  |
| 6  | 3.231160000  | 14.087123000 | 6.417959000  |
| 1  | 2.663420000  | 15.009757000 | 6.406560000  |
| 6  | 4.513042000  | 14.041276000 | 5.873596000  |
| 6  | 5.082679000  | 15.270477000 | 5.183147000  |
| 1  | 4.593168000  | 15.350628000 | 4.204191000  |
| 1  | 4.789926000  | 16.162747000 | 5.750709000  |
| 6  | 6.897708000  | 15.593935000 | 3.537292000  |
| 1  | 7.979789000  | 15.769019000 | 3.492935000  |
| 1  | 6.390089000  | 16.509322000 | 3.199966000  |
| 6  | 6.582244000  | 14.452488000 | 2.601182000  |
| 6  | 6.062778000  | 14.672099000 | 1.330937000  |
| 1  | 5.802456000  | 15.673954000 | 1.012183000  |
| 6  | 5.895270000  | 13.565135000 | 0.474964000  |
| 1  | 5.494134000  | 13.705470000 | -0.523388000 |
| 6  | 6.243711000  | 12.298745000 | 0.906962000  |
| 1  | 6.129154000  | 11.432439000 | 0.265268000  |
| 6  | 6.758471000  | 12.126194000 | 2.223364000  |
| 6  | 7.353038000  | 16.085854000 | 5.921487000  |
| 1  | 6.831365000  | 17.021702000 | 6.163588000  |
| 1  | 8.283181000  | 16.346523000 | 5.413450000  |
| 6  | 7.773310000  | 15.284704000 | 7.202511000  |
| 6  | 6.665109000  | 15.205391000 | 8.284057000  |
| 6  | 6.564495000  | 14.035050000 | 9.056399000  |
| 1  | 7.226138000  | 13.211491000 | 8.818896000  |
| 6  | 5.627442000  | 13.928436000 | 10.089294000 |
| 1  | 5.569746000  | 13.013242000 | 10.671482000 |
| 6  | 4.764259000  | 14.995324000 | 10.373305000 |
| 1  | 4.035469000  | 14.914690000 | 11.173949000 |
| 6  | 4.850423000  | 16.165586000 | 9.611397000  |
| 1  | 4.185359000  | 16.999459000 | 9.815920000  |
| 6  | 5.792461000  | 16.269320000 | 8.578255000  |
| 1  | 5.830441000  | 17.190973000 | 8.006976000  |
| 6  | 9.006639000  | 16.009146000 | 7.813511000  |
| 6  | 8.932912000  | 17.319109000 | 8.321303000  |
| 1  | 7.988419000  | 17.851671000 | 8.328049000  |
| 6  | 10.067872000 | 17.951344000 | 8.844945000  |
| 1  | 9.987324000  | 18.960537000 | 9.238262000  |
| 6  | 11.298980000 | 17.282140000 | 8.873121000  |
| 1  | 12.176828000 | 17.768032000 | 9.288017000  |
| 6  | 11.381932000 | 15.977466000 | 8.368716000  |
| 1  | 12.329540000 | 15.446838000 | 8.387310000  |
| 6  | 10.245838000 | 15.349911000 | 7.841157000  |
| 1  | 10.291700000 | 14.343784000 | 7.444357000  |
| 7  | 5.558007000  | 10.663751000 | 6.452023000  |
| 1  | 6.514107000  | 10.711436000 | 6.044393000  |
| 7  | 5.257869000  | 12.905792000 | 5.881289000  |
| 7  | 6.556576000  | 15.269460000 | 4.955146000  |
| 7  | 6.909239000  | 13.207806000 | 3.054397000  |
| 7  | 7.117399000  | 10.911203000 | 2.702386000  |
| 1  | 7.502746000  | 10.841512000 | 3.669747000  |
| 8  | 8.149184000  | 13.979734000 | 6.779239000  |
| 1  | 7.008383000  | 10.093275000 | 2.124654000  |
| 1  | 5.221457000  | 9.804476000  | 6.856063000  |
| 6  | 13.627094000 | 16.418298000 | 3.374514000  |
| 6  | 14.046954000 | 15.395372000 | 4.324914000  |
| 6  | 13.862855000 | 14.018085000 | 4.035005000  |
| 6  | 14.677771000 | 15.750670000 | 5.544623000  |
| 6  | 15.120363000 | 14.772202000 | 6.433952000  |
| 6  | 14.914269000 | 13.431361000 | 6.110353000  |
| 6  | 14.286544000 | 13.037038000 | 4.925787000  |
| 1  | 14.120616000 | 11.989220000 | 4.711598000  |
| 17 | 15.480505000 | 12.150303000 | 7.271435000  |
| 1  | 15.622793000 | 15.049029000 | 7.351715000  |
| 1  | 14.863913000 | 16.792134000 | 5.774321000  |
| 1  | 13.323823000 | 13.733097000 | 3.141094000  |
| 1  | 15.570731000 | 14.944432000 | 2.165238000  |
| 6  | 14.870428000 | 15.385074000 | 1.467071000  |
| 6  | 13.804610000 | 16.189666000 | 1.945151000  |
| 6  | 15.069557000 | 15.197116000 | 0.099991000  |
| 1  | 15.897780000 | 14.599786000 | -0.258615000 |

|    |              |              |              |
|----|--------------|--------------|--------------|
| 6  | 14.187067000 | 15.802571000 | -0.793781000 |
| 17 | 14.433937000 | 15.550750000 | -2.579008000 |
| 6  | 13.116915000 | 16.593140000 | -0.366620000 |
| 1  | 12.434349000 | 17.031334000 | -1.083168000 |
| 6  | 12.933664000 | 16.789524000 | 0.998313000  |
| 1  | 12.075808000 | 17.348386000 | 1.348292000  |
| 6  | 13.217917000 | 17.730234000 | 3.855770000  |
| 6  | 12.495168000 | 17.863164000 | 5.070935000  |
| 1  | 12.175241000 | 16.976653000 | 5.603206000  |
| 6  | 13.554801000 | 18.906993000 | 3.137671000  |
| 1  | 14.140306000 | 18.837778000 | 2.229778000  |
| 6  | 13.193523000 | 20.165684000 | 3.614862000  |
| 1  | 13.471344000 | 21.060728000 | 3.073497000  |
| 6  | 12.477585000 | 20.247636000 | 4.809196000  |
| 6  | 12.118248000 | 19.115653000 | 5.544877000  |
| 1  | 11.545913000 | 19.203825000 | 6.459408000  |
| 17 | 11.992803000 | 21.887995000 | 5.430547000  |

<sup>5</sup>P<sub>Cl,1Cl,NS</sub>:

|    |              |              |              |
|----|--------------|--------------|--------------|
| 26 | 8.645261000  | 13.197236000 | 5.409418000  |
| 17 | 11.370210000 | 17.398711000 | 2.878600000  |
| 8  | 9.711708000  | 11.489342000 | 5.567106000  |
| 1  | 10.447966000 | 11.449429000 | 6.205756000  |
| 6  | 6.258025000  | 11.133332000 | 5.592468000  |
| 6  | 4.912247000  | 10.713764000 | 5.415167000  |
| 1  | 4.663990000  | 9.662471000  | 5.506011000  |
| 6  | 3.944759000  | 11.659375000 | 5.116877000  |
| 1  | 2.915510000  | 11.349811000 | 4.967963000  |
| 6  | 4.293457000  | 13.018615000 | 5.006112000  |
| 1  | 3.548915000  | 13.772375000 | 4.779976000  |
| 6  | 5.622862000  | 13.378919000 | 5.210181000  |
| 6  | 6.031917000  | 14.838004000 | 5.255839000  |
| 1  | 5.352367000  | 15.431770000 | 4.627370000  |
| 1  | 5.893949000  | 15.182035000 | 6.285415000  |
| 6  | 7.631047000  | 15.346596000 | 3.427210000  |
| 1  | 8.555788000  | 15.921828000 | 3.302226000  |
| 1  | 6.812852000  | 15.962099000 | 3.025663000  |
| 6  | 7.773029000  | 14.088300000 | 2.598999000  |
| 6  | 7.274618000  | 14.035803000 | 1.301817000  |
| 1  | 6.688047000  | 14.856729000 | 0.907562000  |
| 6  | 7.567858000  | 12.904322000 | 0.516052000  |
| 1  | 7.198468000  | 12.837679000 | -0.501954000 |
| 6  | 8.330433000  | 11.878368000 | 1.043779000  |
| 1  | 8.574826000  | 10.998787000 | 0.458949000  |
| 6  | 8.791476000  | 11.970747000 | 2.387259000  |
| 6  | 8.081647000  | 16.178930000 | 5.718331000  |
| 1  | 7.403277000  | 17.037330000 | 5.822241000  |
| 1  | 8.967165000  | 16.515333000 | 5.175954000  |
| 6  | 8.578034000  | 15.643310000 | 7.108061000  |
| 6  | 7.448986000  | 15.628323000 | 8.178441000  |
| 6  | 7.216341000  | 14.462617000 | 8.925268000  |
| 1  | 7.822592000  | 13.591559000 | 8.710217000  |
| 6  | 6.226998000  | 14.428201000 | 9.916646000  |
| 1  | 6.064137000  | 13.515361000 | 10.482365000 |
| 6  | 5.451642000  | 15.563474000 | 10.180560000 |
| 1  | 4.683310000  | 15.538350000 | 10.947077000 |
| 6  | 5.680037000  | 16.735937000 | 9.447876000  |
| 1  | 5.089459000  | 17.625503000 | 9.645901000  |
| 6  | 6.672128000  | 16.768472000 | 8.460837000  |
| 1  | 6.840295000  | 17.693734000 | 7.918548000  |
| 6  | 9.704619000  | 16.571373000 | 7.635528000  |
| 6  | 9.715418000  | 17.961003000 | 7.416956000  |
| 1  | 8.928534000  | 18.435607000 | 6.840086000  |
| 6  | 10.743206000 | 18.761900000 | 7.935470000  |
| 1  | 10.731629000 | 19.832754000 | 7.754925000  |
| 6  | 11.775766000 | 18.186548000 | 8.685680000  |
| 1  | 12.569308000 | 18.806502000 | 9.091292000  |
| 6  | 11.773237000 | 16.802728000 | 8.908481000  |
| 1  | 12.570150000 | 16.344569000 | 9.486922000  |
| 6  | 10.748859000 | 16.005551000 | 8.386796000  |
| 1  | 10.747460000 | 14.933605000 | 8.540775000  |
| 7  | 7.261938000  | 10.261309000 | 5.871567000  |
| 1  | 8.245793000  | 10.588355000 | 5.872932000  |
| 7  | 6.586124000  | 12.458749000 | 5.485116000  |
| 7  | 7.452286000  | 15.106759000 | 4.886042000  |

|    |              |              |              |
|----|--------------|--------------|--------------|
| 7  | 8.502778000  | 13.076182000 | 3.147906000  |
| 7  | 9.527624000  | 10.985792000 | 2.959367000  |
| 1  | 9.760476000  | 11.047311000 | 3.972671000  |
| 8  | 9.093610000  | 14.336149000 | 6.911309000  |
| 1  | 9.726724000  | 10.147795000 | 2.436660000  |
| 1  | 7.062449000  | 9.275329000  | 5.926455000  |
| 6  | 13.351144000 | 16.841826000 | 3.129895000  |
| 6  | 13.295090000 | 15.667468000 | 4.093255000  |
| 6  | 12.384390000 | 14.610569000 | 3.897049000  |
| 6  | 14.207944000 | 15.578086000 | 5.159647000  |
| 6  | 14.207671000 | 14.471354000 | 6.019359000  |
| 6  | 13.279013000 | 13.461929000 | 5.801311000  |
| 6  | 12.363303000 | 13.507020000 | 4.751661000  |
| 1  | 11.628651000 | 12.721154000 | 4.621346000  |
| 17 | 13.242316000 | 12.024446000 | 6.939304000  |
| 1  | 14.914101000 | 14.413365000 | 6.837710000  |
| 1  | 14.933407000 | 16.363315000 | 5.327329000  |
| 1  | 11.665787000 | 14.659561000 | 3.088572000  |
| 1  | 14.616796000 | 14.549325000 | 2.265454000  |
| 6  | 14.451630000 | 15.261069000 | 1.467575000  |
| 6  | 13.800685000 | 16.479913000 | 1.725408000  |
| 6  | 14.911959000 | 14.946224000 | 0.181963000  |
| 1  | 15.413762000 | 14.005097000 | -0.004269000 |
| 6  | 14.711060000 | 15.863510000 | -0.841900000 |
| 17 | 15.301193000 | 15.460084000 | -2.526806000 |
| 6  | 14.072444000 | 17.084705000 | -0.626199000 |
| 1  | 13.923954000 | 17.783893000 | -1.439391000 |
| 6  | 13.623287000 | 17.386379000 | 0.659698000  |
| 1  | 13.114455000 | 18.326803000 | 0.832488000  |
| 6  | 13.995450000 | 18.087615000 | 3.711136000  |
| 6  | 13.466230000 | 18.676187000 | 4.878839000  |
| 1  | 12.567514000 | 18.272621000 | 5.329764000  |
| 6  | 15.160611000 | 18.638704000 | 3.150979000  |
| 1  | 15.607177000 | 18.199678000 | 2.268581000  |
| 6  | 15.780756000 | 19.755001000 | 3.729295000  |
| 1  | 16.679485000 | 20.169549000 | 3.290478000  |
| 6  | 15.221072000 | 20.312366000 | 4.871935000  |
| 6  | 14.070235000 | 19.789643000 | 5.462056000  |
| 1  | 13.650789000 | 20.236259000 | 6.354625000  |
| 17 | 16.018112000 | 21.775117000 | 5.630668000  |

Data for  $1_{Cl,NH}$ :

${}^5Re_{1Cl,NH}$ :

|    |              |              |              |
|----|--------------|--------------|--------------|
| 6  | 12.924816000 | 9.438806000  | 0.851444000  |
| 6  | 14.273948000 | 9.240269000  | 1.386756000  |
| 6  | 15.226933000 | 10.292693000 | 1.403732000  |
| 6  | 16.511855000 | 10.107012000 | 1.915039000  |
| 6  | 16.857809000 | 8.855858000  | 2.423453000  |
| 6  | 15.960205000 | 7.789247000  | 2.431084000  |
| 6  | 14.679916000 | 7.984862000  | 1.911900000  |
| 1  | 16.246222000 | 6.828511000  | 2.841128000  |
| 17 | 18.543524000 | 8.605237000  | 3.099712000  |
| 1  | 17.229551000 | 10.918104000 | 1.906043000  |
| 1  | 14.963925000 | 11.259021000 | 0.990365000  |
| 1  | 13.975021000 | 7.162441000  | 1.935063000  |
| 6  | 12.264445000 | 10.740970000 | 0.977512000  |
| 6  | 12.486589000 | 11.576153000 | 2.103478000  |
| 1  | 13.133624000 | 11.238824000 | 2.904372000  |
| 6  | 11.859107000 | 12.816647000 | 2.226783000  |
| 1  | 12.030647000 | 13.430447000 | 3.102293000  |
| 6  | 10.999088000 | 13.237008000 | 1.213644000  |
| 17 | 10.172658000 | 14.868453000 | 1.368388000  |
| 6  | 10.745994000 | 12.455330000 | 0.087726000  |
| 1  | 10.081047000 | 12.805937000 | -0.691998000 |
| 6  | 11.375247000 | 11.214668000 | -0.022587000 |
| 1  | 11.193530000 | 10.612742000 | -0.904964000 |
| 6  | 12.230356000 | 8.329439000  | 0.186290000  |
| 6  | 12.935707000 | 7.397051000  | -0.617255000 |
| 6  | 12.280836000 | 6.344457000  | -1.258572000 |
| 1  | 12.832204000 | 5.650391000  | -1.880882000 |
| 1  | 14.003867000 | 7.513184000  | -0.759032000 |
| 6  | 10.829320000 | 8.151395000  | 0.324108000  |
| 1  | 10.260774000 | 8.820847000  | 0.960462000  |
| 6  | 10.165869000 | 7.097539000  | -0.307203000 |
| 1  | 9.098554000  | 6.965745000  | -0.178300000 |
| 6  | 10.903346000 | 6.212545000  | -1.091642000 |
| 17 | 10.036274000 | 4.829355000  | -1.928174000 |
| 26 | 7.598730000  | 9.899387000  | 5.650715000  |
| 17 | 8.758215000  | 9.588115000  | 3.356778000  |
| 8  | 7.442373000  | 8.040899000  | 5.795877000  |
| 1  | 7.824795000  | 7.444938000  | 5.125208000  |
| 6  | 7.356085000  | 5.828302000  | 8.661351000  |
| 1  | 7.608503000  | 6.422034000  | 7.776242000  |
| 1  | 6.683530000  | 5.017857000  | 8.350279000  |
| 1  | 8.279085000  | 5.370923000  | 9.040205000  |
| 6  | 6.368570000  | 5.796450000  | 10.978785000 |
| 1  | 7.277983000  | 5.320025000  | 11.365198000 |
| 1  | 5.661984000  | 5.003317000  | 10.702986000 |
| 1  | 5.920941000  | 6.382081000  | 11.792084000 |
| 6  | 7.683683000  | 7.798776000  | 10.203925000 |
| 1  | 7.961872000  | 8.445490000  | 9.365237000  |
| 1  | 8.603489000  | 7.349148000  | 10.599106000 |
| 1  | 7.250658000  | 8.428912000  | 10.990497000 |
| 6  | 6.696451000  | 6.695327000  | 9.761091000  |
| 6  | 5.354414000  | 7.299288000  | 9.243058000  |
| 1  | 4.734299000  | 6.457771000  | 8.903288000  |
| 1  | 4.815168000  | 7.731988000  | 10.096072000 |
| 6  | 5.689634000  | 9.764996000  | 8.395660000  |
| 6  | 5.221046000  | 10.343699000 | 9.584387000  |
| 1  | 4.723254000  | 9.725836000  | 10.318889000 |
| 6  | 5.389693000  | 11.706656000 | 9.823694000  |
| 1  | 5.038816000  | 12.150295000 | 10.748823000 |
| 6  | 6.003098000  | 12.489988000 | 8.849465000  |
| 1  | 6.141806000  | 13.555276000 | 8.991004000  |
| 6  | 6.437425000  | 11.883757000 | 7.666937000  |
| 6  | 6.951682000  | 12.783861000 | 6.565116000  |
| 1  | 6.072437000  | 13.235993000 | 6.090351000  |
| 1  | 7.520089000  | 13.606521000 | 7.009920000  |
| 6  | 7.234573000  | 12.504569000 | 4.143924000  |
| 1  | 7.951059000  | 12.144770000 | 3.400410000  |
| 1  | 7.142290000  | 13.593304000 | 4.040199000  |
| 6  | 5.908107000  | 11.831102000 | 3.902365000  |
| 6  | 4.873815000  | 12.483889000 | 3.233423000  |
| 1  | 4.996156000  | 13.515786000 | 2.926290000  |
| 6  | 3.688843000  | 11.786729000 | 2.975972000  |
| 1  | 2.861501000  | 12.273938000 | 2.472348000  |



|   |              |              |              |
|---|--------------|--------------|--------------|
| 6 | 3.593786000  | 10.455608000 | 3.371579000  |
| 1 | 2.696255000  | 9.882415000  | 3.170903000  |
| 6 | 4.666954000  | 9.832627000  | 4.035323000  |
| 6 | 4.613452000  | 7.499176000  | 3.074442000  |
| 1 | 5.531787000  | 7.731432000  | 2.515914000  |
| 1 | 3.772236000  | 7.797742000  | 2.432289000  |
| 6 | 4.541299000  | 5.955975000  | 3.276615000  |
| 6 | 4.464799000  | 5.304044000  | 1.873488000  |
| 1 | 4.435598000  | 4.210638000  | 1.955987000  |
| 1 | 5.338072000  | 5.574866000  | 1.266865000  |
| 1 | 3.564327000  | 5.628359000  | 1.336851000  |
| 6 | 3.280995000  | 5.560306000  | 4.081510000  |
| 1 | 3.324147000  | 5.930347000  | 5.112234000  |
| 1 | 3.184804000  | 4.468463000  | 4.125871000  |
| 1 | 2.372534000  | 5.959980000  | 3.612774000  |
| 6 | 5.805854000  | 5.433615000  | 3.998252000  |
| 1 | 5.911249000  | 5.862301000  | 5.000162000  |
| 1 | 6.708792000  | 5.681642000  | 3.425049000  |
| 1 | 5.763401000  | 4.342170000  | 4.101287000  |
| 6 | 9.235640000  | 12.381742000 | 5.601873000  |
| 1 | 9.434836000  | 13.449329000 | 5.751985000  |
| 1 | 9.670293000  | 12.083019000 | 4.646960000  |
| 6 | 9.880986000  | 11.479919000 | 6.698599000  |
| 6 | 9.782060000  | 12.034231000 | 8.140624000  |
| 6 | 9.676113000  | 11.122314000 | 9.204843000  |
| 1 | 9.601061000  | 10.067171000 | 8.975299000  |
| 6 | 9.658392000  | 11.563836000 | 10.531646000 |
| 1 | 9.575298000  | 10.840710000 | 11.337275000 |
| 6 | 9.746254000  | 12.931578000 | 10.822001000 |
| 1 | 9.730699000  | 13.276575000 | 11.850958000 |
| 6 | 9.858301000  | 13.849240000 | 9.771589000  |
| 1 | 9.931376000  | 14.911960000 | 9.981281000  |
| 6 | 9.881376000  | 13.404165000 | 8.442583000  |
| 1 | 9.981421000  | 14.141788000 | 7.653356000  |
| 6 | 11.381938000 | 11.290391000 | 6.362745000  |
| 6 | 12.232308000 | 12.398091000 | 6.190232000  |
| 1 | 11.849938000 | 13.407459000 | 6.302710000  |
| 6 | 13.587216000 | 12.217536000 | 5.886838000  |
| 1 | 14.228805000 | 13.083774000 | 5.757539000  |
| 6 | 14.115164000 | 10.925505000 | 5.758711000  |
| 1 | 15.166048000 | 10.784516000 | 5.526785000  |
| 6 | 13.275504000 | 9.819346000  | 5.937048000  |
| 1 | 13.674281000 | 8.814027000  | 5.841849000  |
| 6 | 11.918773000 | 10.000828000 | 6.235321000  |
| 1 | 11.262333000 | 9.150595000  | 6.368814000  |
| 1 | 4.458102000  | 8.284636000  | 7.551141000  |
| 7 | 6.309024000  | 10.547320000 | 7.449084000  |
| 7 | 7.763028000  | 12.132756000 | 5.491046000  |
| 7 | 5.798306000  | 10.537798000 | 4.326050000  |
| 1 | 5.436652000  | 8.095889000  | 5.004986000  |
| 8 | 9.207833000  | 10.215093000 | 6.624924000  |
| 6 | 5.430539000  | 8.307830000  | 8.069607000  |
| 1 | 6.163670000  | 7.975723000  | 7.331519000  |
| 1 | 3.664483000  | 8.168481000  | 4.917979000  |
| 6 | 4.593193000  | 8.361859000  | 4.366645000  |

<sup>5</sup>TS<sub>OH,1Cl,NH<sup>+</sup></sub>:

|    |              |              |              |
|----|--------------|--------------|--------------|
| 26 | 8.366219000  | 10.991397000 | 4.649471000  |
| 17 | 8.378521000  | 12.222477000 | 2.392213000  |
| 8  | 9.166709000  | 9.305198000  | 4.025931000  |
| 1  | 9.377597000  | 8.625576000  | 4.693844000  |
| 6  | 10.607056000 | 7.324035000  | 8.768919000  |
| 1  | 10.582071000 | 8.238821000  | 8.166044000  |
| 1  | 11.104610000 | 6.542009000  | 8.182843000  |
| 1  | 11.224940000 | 7.526911000  | 9.652560000  |
| 6  | 9.312960000  | 5.619075000  | 10.091573000 |
| 1  | 9.922829000  | 5.831444000  | 10.978104000 |
| 1  | 9.785921000  | 4.793788000  | 9.544712000  |
| 1  | 8.326391000  | 5.279984000  | 10.432387000 |
| 6  | 8.525795000  | 8.007684000  | 10.023539000 |
| 1  | 8.488095000  | 8.949906000  | 9.467041000  |
| 1  | 9.098710000  | 8.188138000  | 10.942007000 |
| 1  | 7.502361000  | 7.739044000  | 10.311921000 |
| 6  | 9.188905000  | 6.879625000  | 9.198487000  |
| 6  | 8.334647000  | 6.480803000  | 7.955689000  |

|   |              |              |              |
|---|--------------|--------------|--------------|
| 1 | 8.853751000  | 5.649053000  | 7.459763000  |
| 1 | 7.379687000  | 6.069613000  | 8.309911000  |
| 6 | 6.999287000  | 8.585375000  | 7.195240000  |
| 6 | 5.756465000  | 8.218770000  | 7.741706000  |
| 1 | 5.524953000  | 7.174521000  | 7.912937000  |
| 6 | 4.831917000  | 9.208724000  | 8.072771000  |
| 1 | 3.867590000  | 8.941905000  | 8.491382000  |
| 6 | 5.171790000  | 10.551565000 | 7.875990000  |
| 1 | 4.490303000  | 11.347056000 | 8.154338000  |
| 6 | 6.410138000  | 10.855482000 | 7.304624000  |
| 6 | 6.879461000  | 12.283820000 | 7.169614000  |
| 1 | 6.077023000  | 12.970189000 | 7.473950000  |
| 1 | 7.706839000  | 12.420646000 | 7.867941000  |
| 6 | 6.268068000  | 13.114941000 | 4.926728000  |
| 1 | 6.719588000  | 13.554582000 | 4.031887000  |
| 1 | 5.654407000  | 13.882874000 | 5.419336000  |
| 6 | 5.402466000  | 11.954361000 | 4.507524000  |
| 6 | 4.023919000  | 12.112705000 | 4.370497000  |
| 1 | 3.565942000  | 13.068587000 | 4.596266000  |
| 6 | 3.255463000  | 11.021477000 | 3.957351000  |
| 1 | 2.179855000  | 11.110997000 | 3.853061000  |
| 6 | 3.894321000  | 9.812393000  | 3.700069000  |
| 1 | 3.321325000  | 8.944610000  | 3.397803000  |
| 6 | 5.289934000  | 9.699692000  | 3.844741000  |
| 6 | 5.607566000  | 7.705334000  | 2.245425000  |
| 1 | 6.427191000  | 7.896766000  | 1.540624000  |
| 1 | 4.721183000  | 8.190128000  | 1.815704000  |
| 6 | 5.328911000  | 6.171108000  | 2.272333000  |
| 6 | 5.069705000  | 5.709424000  | 0.817358000  |
| 1 | 4.859947000  | 4.633243000  | 0.783255000  |
| 1 | 5.940854000  | 5.906016000  | 0.181140000  |
| 1 | 4.208856000  | 6.235937000  | 0.386456000  |
| 6 | 4.073844000  | 5.853950000  | 3.120243000  |
| 1 | 4.195897000  | 6.152606000  | 4.168099000  |
| 1 | 3.868008000  | 4.776492000  | 3.107511000  |
| 1 | 3.190983000  | 6.368277000  | 2.719420000  |
| 6 | 6.544241000  | 5.398816000  | 2.833580000  |
| 1 | 6.766932000  | 5.691960000  | 3.866651000  |
| 1 | 7.435348000  | 5.582475000  | 2.221091000  |
| 1 | 6.350420000  | 4.319009000  | 2.830218000  |
| 6 | 8.468153000  | 13.698892000 | 5.890869000  |
| 1 | 8.208623000  | 14.487113000 | 6.609862000  |
| 1 | 8.527336000  | 14.154917000 | 4.903886000  |
| 6 | 9.860780000  | 13.047754000 | 6.204370000  |
| 6 | 10.079485000 | 12.824175000 | 7.717633000  |
| 6 | 10.619278000 | 11.611152000 | 8.173128000  |
| 1 | 10.831098000 | 10.840463000 | 7.442728000  |
| 6 | 10.870092000 | 11.399741000 | 9.535046000  |
| 1 | 11.288291000 | 10.453202000 | 9.863567000  |
| 6 | 10.584061000 | 12.401600000 | 10.470097000 |
| 1 | 10.775261000 | 12.238366000 | 11.526071000 |
| 6 | 10.052721000 | 13.620303000 | 10.028876000 |
| 1 | 9.832782000  | 14.409068000 | 10.741870000 |
| 6 | 9.808893000  | 13.830525000 | 8.666261000  |
| 1 | 9.418795000  | 14.792004000 | 8.346827000  |
| 6 | 10.967754000 | 13.982609000 | 5.631598000  |
| 6 | 12.013470000 | 14.506894000 | 6.410943000  |
| 1 | 12.070321000 | 14.280423000 | 7.468014000  |
| 6 | 12.995283000 | 15.333231000 | 5.844035000  |
| 1 | 13.790104000 | 15.725633000 | 6.471393000  |
| 6 | 12.951397000 | 15.652738000 | 4.484189000  |
| 1 | 13.707125000 | 16.297065000 | 4.045894000  |
| 6 | 11.923586000 | 15.123918000 | 3.691363000  |
| 1 | 11.883781000 | 15.351243000 | 2.630263000  |
| 6 | 10.950758000 | 14.294004000 | 4.256254000  |
| 1 | 10.183573000 | 13.866827000 | 3.619076000  |
| 1 | 7.772447000  | 7.034098000  | 5.952963000  |
| 7 | 7.290910000  | 9.887585000  | 6.936627000  |
| 7 | 7.381450000  | 12.671334000 | 5.812526000  |
| 7 | 6.032386000  | 10.771885000 | 4.244021000  |
| 1 | 7.046352000  | 8.496243000  | 3.702228000  |
| 8 | 9.903219000  | 11.790409000 | 5.505991000  |
| 6 | 8.064477000  | 7.558451000  | 6.874271000  |
| 1 | 8.988742000  | 8.098390000  | 6.649579000  |
| 1 | 5.653959000  | 7.703195000  | 4.430205000  |

|    |              |              |              |
|----|--------------|--------------|--------------|
| 6  | 5.965198000  | 8.366477000  | 3.610540000  |
| 6  | 10.861310000 | 8.408704000  | 2.633053000  |
| 6  | 11.194952000 | 7.354779000  | 3.604383000  |
| 6  | 12.469307000 | 7.285491000  | 4.218788000  |
| 6  | 12.797496000 | 6.248460000  | 5.094308000  |
| 6  | 11.843547000 | 5.270171000  | 5.365610000  |
| 6  | 10.571008000 | 5.301365000  | 4.794934000  |
| 6  | 10.254183000 | 6.341063000  | 3.921551000  |
| 1  | 9.842070000  | 4.534266000  | 5.024174000  |
| 17 | 12.271254000 | 3.901818000  | 6.499964000  |
| 1  | 13.781843000 | 6.200806000  | 5.542803000  |
| 1  | 13.221566000 | 8.028076000  | 3.987809000  |
| 1  | 9.264371000  | 6.376990000  | 3.485266000  |
| 6  | 11.764532000 | 9.574351000  | 2.502405000  |
| 6  | 12.129323000 | 10.374668000 | 3.607427000  |
| 1  | 11.611949000 | 10.259538000 | 4.550530000  |
| 6  | 13.083572000 | 11.386655000 | 3.474721000  |
| 1  | 13.336354000 | 12.012773000 | 4.320440000  |
| 6  | 13.679212000 | 11.591152000 | 2.231871000  |
| 17 | 14.961006000 | 12.888259000 | 2.058989000  |
| 6  | 13.329467000 | 10.844206000 | 1.110045000  |
| 1  | 13.800764000 | 11.025020000 | 0.152171000  |
| 6  | 12.364940000 | 9.844217000  | 1.249650000  |
| 1  | 12.106771000 | 9.244069000  | 0.385975000  |
| 6  | 10.039799000 | 8.070438000  | 1.451720000  |
| 6  | 10.067573000 | 6.778852000  | 0.877071000  |
| 6  | 9.376760000  | 6.499694000  | -0.306538000 |
| 1  | 9.423278000  | 5.513179000  | -0.750413000 |
| 1  | 10.664185000 | 5.995049000  | 1.327328000  |
| 6  | 9.287254000  | 9.077353000  | 0.803939000  |
| 1  | 9.226248000  | 10.065701000 | 1.246532000  |
| 6  | 8.584321000  | 8.805828000  | -0.370781000 |
| 1  | 8.001102000  | 9.580622000  | -0.852769000 |
| 6  | 8.646199000  | 7.520391000  | -0.908994000 |
| 17 | 7.742374000  | 7.164602000  | -2.461681000 |

<sup>5</sup>P<sub>OH,1Cl,NH<sub>2</sub></sub>:

|    |              |              |             |
|----|--------------|--------------|-------------|
| 26 | 8.199113000  | 10.889811000 | 5.007380000 |
| 17 | 9.157806000  | 9.878712000  | 2.934345000 |
| 8  | 11.024201000 | 7.209728000  | 3.119272000 |
| 1  | 10.545534000 | 8.051904000  | 2.921250000 |
| 6  | 11.201229000 | 7.867759000  | 7.080288000 |
| 1  | 10.812655000 | 8.800572000  | 6.656080000 |
| 1  | 11.395547000 | 7.175207000  | 6.251939000 |
| 1  | 12.158412000 | 8.097134000  | 7.564691000 |
| 6  | 10.883106000 | 6.007642000  | 8.747511000 |
| 1  | 11.801773000 | 6.290777000  | 9.275449000 |
| 1  | 11.145683000 | 5.262573000  | 7.986201000 |
| 1  | 10.209026000 | 5.532020000  | 9.471181000 |
| 6  | 9.913518000  | 8.280292000  | 9.215327000 |
| 1  | 9.491627000  | 9.205661000  | 8.810286000 |
| 1  | 10.836545000 | 8.542388000  | 9.748009000 |
| 1  | 9.206273000  | 7.873420000  | 9.948873000 |
| 6  | 10.218113000 | 7.250228000  | 8.102704000 |
| 6  | 8.919246000  | 6.759633000  | 7.393429000 |
| 1  | 9.207614000  | 5.943493000  | 6.716410000 |
| 1  | 8.261132000  | 6.306585000  | 8.147863000 |
| 6  | 7.269909000  | 8.785714000  | 7.283584000 |
| 6  | 6.401120000  | 8.393270000  | 8.314074000 |
| 1  | 6.340914000  | 7.349893000  | 8.597058000 |
| 6  | 5.615965000  | 9.346635000  | 8.960995000 |
| 1  | 4.933314000  | 9.051540000  | 9.750113000 |
| 6  | 5.721015000  | 10.687888000 | 8.582698000 |
| 1  | 5.135371000  | 11.454710000 | 9.076361000 |
| 6  | 6.595905000  | 11.034132000 | 7.550179000 |
| 6  | 6.816376000  | 12.494332000 | 7.206307000 |
| 1  | 5.907355000  | 13.066530000 | 7.436036000 |
| 1  | 7.600545000  | 12.868614000 | 7.871840000 |
| 6  | 6.118493000  | 13.073604000 | 4.896505000 |
| 1  | 6.547293000  | 13.461748000 | 3.965666000 |
| 1  | 5.479617000  | 13.862594000 | 5.318473000 |
| 6  | 5.284877000  | 11.860788000 | 4.564876000 |
| 6  | 3.895639000  | 11.951856000 | 4.495505000 |
| 1  | 3.402654000  | 12.884420000 | 4.743461000 |
| 6  | 3.161217000  | 10.826995000 | 4.105954000 |

|    |              |              |              |
|----|--------------|--------------|--------------|
| 1  | 2.079144000  | 10.866444000 | 4.050205000  |
| 6  | 3.846102000  | 9.656343000  | 3.797407000  |
| 1  | 3.309058000  | 8.765811000  | 3.492040000  |
| 6  | 5.250529000  | 9.608813000  | 3.889197000  |
| 6  | 5.901721000  | 7.996437000  | 2.024368000  |
| 1  | 6.633287000  | 8.638209000  | 1.516429000  |
| 1  | 4.912296000  | 8.264123000  | 1.627139000  |
| 6  | 6.179517000  | 6.509373000  | 1.646216000  |
| 6  | 6.309863000  | 6.431292000  | 0.105483000  |
| 1  | 6.457277000  | 5.394046000  | -0.219619000 |
| 1  | 7.165038000  | 7.021544000  | -0.245539000 |
| 1  | 5.406068000  | 6.814342000  | -0.385451000 |
| 6  | 5.000097000  | 5.610943000  | 2.091137000  |
| 1  | 4.857650000  | 5.630017000  | 3.178380000  |
| 1  | 5.182683000  | 4.568792000  | 1.801289000  |
| 1  | 4.063162000  | 5.933700000  | 1.619446000  |
| 6  | 7.488997000  | 5.998549000  | 2.291239000  |
| 1  | 7.413026000  | 5.964826000  | 3.384736000  |
| 1  | 8.341410000  | 6.636671000  | 2.033895000  |
| 1  | 7.709629000  | 4.981037000  | 1.944734000  |
| 6  | 8.338959000  | 13.785046000 | 5.707385000  |
| 1  | 8.085842000  | 14.668356000 | 6.307934000  |
| 1  | 8.380471000  | 14.093645000 | 4.660882000  |
| 6  | 9.743350000  | 13.187215000 | 6.066530000  |
| 6  | 10.058160000 | 13.235241000 | 7.587653000  |
| 6  | 10.658998000 | 12.121968000 | 8.197422000  |
| 1  | 10.842870000 | 11.245146000 | 7.589957000  |
| 6  | 11.007507000 | 12.143237000 | 9.553480000  |
| 1  | 11.471504000 | 11.270133000 | 10.002420000 |
| 6  | 10.759224000 | 13.281872000 | 10.329403000 |
| 1  | 11.026457000 | 13.299354000 | 11.381322000 |
| 6  | 10.164512000 | 14.400639000 | 9.732959000  |
| 1  | 9.968582000  | 15.292199000 | 10.320997000 |
| 6  | 9.822496000  | 14.378856000 | 8.374973000  |
| 1  | 9.376249000  | 15.266717000 | 7.939158000  |
| 6  | 10.834216000 | 14.015636000 | 5.336286000  |
| 6  | 10.809372000 | 15.422017000 | 5.300446000  |
| 1  | 10.005993000 | 15.972108000 | 5.779642000  |
| 6  | 11.818102000 | 16.139677000 | 4.645356000  |
| 1  | 11.777972000 | 17.224669000 | 4.624410000  |
| 6  | 12.872792000 | 15.463072000 | 4.020498000  |
| 1  | 13.655961000 | 16.019044000 | 3.514448000  |
| 6  | 12.905785000 | 14.063230000 | 4.052019000  |
| 1  | 13.717648000 | 13.527562000 | 3.569198000  |
| 6  | 11.893078000 | 13.347385000 | 4.701904000  |
| 1  | 11.899120000 | 12.264705000 | 4.717932000  |
| 1  | 7.438007000  | 7.185183000  | 5.902744000  |
| 7  | 7.335486000  | 10.094029000 | 6.898581000  |
| 7  | 7.254354000  | 12.757039000 | 5.804088000  |
| 7  | 5.958265000  | 10.707367000 | 4.279267000  |
| 1  | 7.003559000  | 8.372551000  | 3.849493000  |
| 8  | 9.766207000  | 11.843978000 | 5.597821000  |
| 6  | 8.114140000  | 7.773210000  | 6.539381000  |
| 1  | 8.785732000  | 8.301398000  | 5.856651000  |
| 1  | 5.480155000  | 7.511403000  | 4.106736000  |
| 6  | 5.959804000  | 8.321234000  | 3.541685000  |
| 6  | 12.161714000 | 6.998423000  | 2.213942000  |
| 6  | 12.837035000 | 5.716476000  | 2.736121000  |
| 6  | 14.187688000 | 5.439094000  | 2.469344000  |
| 6  | 14.784923000 | 4.255796000  | 2.921105000  |
| 6  | 14.011406000 | 3.355598000  | 3.647088000  |
| 6  | 12.670637000 | 3.595214000  | 3.932081000  |
| 6  | 12.088061000 | 4.781260000  | 3.469298000  |
| 1  | 12.087946000 | 2.880405000  | 4.500102000  |
| 17 | 14.786121000 | 1.803219000  | 4.250655000  |
| 1  | 15.827812000 | 4.051267000  | 2.713121000  |
| 1  | 14.791528000 | 6.145811000  | 1.912577000  |
| 1  | 11.048532000 | 4.988718000  | 3.682507000  |
| 6  | 13.130975000 | 8.193667000  | 2.319511000  |
| 6  | 13.278625000 | 8.848638000  | 3.553946000  |
| 1  | 12.675079000 | 8.536548000  | 4.397284000  |
| 6  | 14.187421000 | 9.901088000  | 3.707730000  |
| 1  | 14.294314000 | 10.403048000 | 4.661436000  |
| 6  | 14.952422000 | 10.285589000 | 2.609076000  |
| 17 | 16.154908000 | 11.660543000 | 2.799746000  |

|    |              |             |              |
|----|--------------|-------------|--------------|
| 6  | 14.836555000 | 9.661845000 | 1.371779000  |
| 1  | 15.439559000 | 9.979431000 | 0.530220000  |
| 6  | 13.917644000 | 8.612830000 | 1.234356000  |
| 1  | 13.820328000 | 8.129140000 | 0.269526000  |
| 6  | 11.615567000 | 6.828794000 | 0.778430000  |
| 6  | 11.733267000 | 5.630682000 | 0.058664000  |
| 6  | 11.184021000 | 5.498458000 | -1.224989000 |
| 1  | 11.283315000 | 4.568847000 | -1.771622000 |
| 1  | 12.255911000 | 4.785041000 | 0.486717000  |
| 6  | 10.927167000 | 7.903995000 | 0.182073000  |
| 1  | 10.818143000 | 8.844342000 | 0.711986000  |
| 6  | 10.370333000 | 7.789247000 | -1.094875000 |
| 1  | 9.844279000  | 8.622544000 | -1.544004000 |
| 6  | 10.511919000 | 6.582000000 | -1.776562000 |
| 17 | 9.790584000  | 6.421543000 | -3.457076000 |

<sup>5</sup>TS<sub>Cl,1Cl,NH</sub>:

|    |             |              |              |
|----|-------------|--------------|--------------|
| 26 | 7.691246000 | 10.193372000 | 6.161870000  |
| 17 | 9.714160000 | 9.308938000  | 2.493125000  |
| 8  | 8.069330000 | 8.453760000  | 5.442878000  |
| 1  | 8.546386000 | 8.448233000  | 4.584312000  |
| 6  | 8.613856000 | 6.136800000  | 8.347663000  |
| 1  | 8.643456000 | 6.848659000  | 7.515532000  |
| 1  | 8.373894000 | 5.145672000  | 7.939930000  |
| 1  | 9.618136000 | 6.083618000  | 8.787596000  |
| 6  | 7.565310000 | 5.476881000  | 10.540664000 |
| 1  | 8.560201000 | 5.375207000  | 10.991868000 |
| 1  | 7.272833000 | 4.496621000  | 10.142886000 |
| 1  | 6.858333000 | 5.745359000  | 11.336228000 |
| 6  | 7.981393000 | 7.908462000  | 10.036095000 |
| 1  | 8.059085000 | 8.686260000  | 9.269847000  |
| 1  | 8.957349000 | 7.826758000  | 10.531628000 |
| 1  | 7.249456000 | 8.237781000  | 10.784861000 |
| 6  | 7.578576000 | 6.548129000  | 9.422243000  |
| 6  | 6.148988000 | 6.604467000  | 8.804207000  |
| 1  | 5.947304000 | 5.619934000  | 8.359445000  |
| 1  | 5.422870000 | 6.721497000  | 9.621213000  |
| 6  | 5.466213000 | 9.043033000  | 8.216317000  |
| 6  | 4.368432000 | 9.183482000  | 9.082080000  |
| 1  | 3.832926000 | 8.300560000  | 9.409581000  |
| 6  | 3.964265000 | 10.450529000 | 9.499681000  |
| 1  | 3.110149000 | 10.566820000 | 10.157811000 |
| 6  | 4.671288000 | 11.570068000 | 9.052163000  |
| 1  | 4.386932000 | 12.570556000 | 9.357313000  |
| 6  | 5.758994000 | 11.385202000 | 8.195713000  |
| 6  | 6.615396000 | 12.563291000 | 7.787775000  |
| 1  | 6.024476000 | 13.489003000 | 7.847333000  |
| 1  | 7.421643000 | 12.654722000 | 8.521291000  |
| 6  | 6.359010000 | 12.905340000 | 5.349942000  |
| 1  | 6.985220000 | 13.043527000 | 4.461882000  |
| 1  | 5.916584000 | 13.882130000 | 5.595733000  |
| 6  | 5.272482000 | 11.918852000 | 4.999127000  |
| 6  | 3.952096000 | 12.329455000 | 4.815777000  |
| 1  | 3.674031000 | 13.361340000 | 4.997285000  |
| 6  | 3.004523000 | 11.388174000 | 4.395942000  |
| 1  | 1.967996000 | 11.675214000 | 4.255745000  |
| 6  | 3.418222000 | 10.080791000 | 4.154904000  |
| 1  | 2.714318000 | 9.330881000  | 3.811642000  |
| 6  | 4.764674000 | 9.717008000  | 4.355262000  |
| 6  | 5.397574000 | 8.127454000  | 2.493500000  |
| 1  | 6.231267000 | 8.760427000  | 2.157519000  |
| 1  | 4.496186000 | 8.494311000  | 1.979364000  |
| 6  | 5.660966000 | 6.668441000  | 2.012859000  |
| 6  | 5.897868000 | 6.713789000  | 0.482783000  |
| 1  | 6.069859000 | 5.705146000  | 0.086536000  |
| 1  | 6.774320000 | 7.327556000  | 0.240346000  |
| 1  | 5.030025000 | 7.138590000  | -0.037907000 |
| 6  | 4.435926000 | 5.767379000  | 2.298936000  |
| 1  | 4.249669000 | 5.662320000  | 3.373855000  |
| 1  | 4.598414000 | 4.761225000  | 1.892402000  |
| 1  | 3.529780000 | 6.177034000  | 1.834184000  |
| 6  | 6.914038000 | 6.074696000  | 2.697245000  |
| 1  | 6.776129000 | 5.981865000  | 3.779860000  |
| 1  | 7.791161000 | 6.709618000  | 2.524663000  |
| 1  | 7.128462000 | 5.075237000  | 2.297408000  |

|                                           |              |              |              |
|-------------------------------------------|--------------|--------------|--------------|
| 6                                         | 8.589899000  | 13.099190000 | 6.380324000  |
| 1                                         | 8.531155000  | 14.120022000 | 6.783780000  |
| 1                                         | 8.848505000  | 13.169932000 | 5.321759000  |
| 6                                         | 9.703676000  | 12.239645000 | 7.072738000  |
| 6                                         | 9.823310000  | 12.522904000 | 8.599317000  |
| 6                                         | 9.899263000  | 11.439872000 | 9.489758000  |
| 1                                         | 9.835770000  | 10.441102000 | 9.076986000  |
| 6                                         | 10.047407000 | 11.648400000 | 10.866736000 |
| 1                                         | 10.103693000 | 10.795371000 | 11.536776000 |
| 6                                         | 10.121866000 | 12.949074000 | 11.379834000 |
| 1                                         | 10.234101000 | 13.113491000 | 12.447040000 |
| 6                                         | 10.052573000 | 14.038270000 | 10.501165000 |
| 1                                         | 10.112178000 | 15.052285000 | 10.885404000 |
| 6                                         | 9.909846000  | 13.826429000 | 9.124470000  |
| 1                                         | 9.872537000  | 14.687802000 | 8.465094000  |
| 6                                         | 11.077263000 | 12.589687000 | 6.437220000  |
| 6                                         | 11.445837000 | 13.903149000 | 6.094103000  |
| 1                                         | 10.755412000 | 14.727214000 | 6.242738000  |
| 6                                         | 12.709562000 | 14.175887000 | 5.552639000  |
| 1                                         | 12.973972000 | 15.197001000 | 5.294258000  |
| 6                                         | 13.628924000 | 13.139077000 | 5.349143000  |
| 1                                         | 14.611643000 | 13.351202000 | 4.939162000  |
| 6                                         | 13.268446000 | 11.826121000 | 5.684818000  |
| 1                                         | 13.971515000 | 11.012703000 | 5.530199000  |
| 6                                         | 12.003519000 | 11.556453000 | 6.220040000  |
| 1                                         | 11.705796000 | 10.545601000 | 6.469620000  |
| 1                                         | 5.064734000  | 7.307482000  | 7.079650000  |
| 7                                         | 6.141106000  | 10.146097000 | 7.778232000  |
| 7                                         | 7.251207000  | 12.432871000 | 6.444768000  |
| 7                                         | 5.671443000  | 10.631555000 | 4.799860000  |
| 1                                         | 6.185596000  | 8.139366000  | 4.531830000  |
| 8                                         | 9.402549000  | 10.875938000 | 6.843722000  |
| 6                                         | 5.885495000  | 7.678434000  | 7.711769000  |
| 1                                         | 6.748576000  | 7.781464000  | 7.048506000  |
| 1                                         | 4.487855000  | 7.606003000  | 4.403101000  |
| 6                                         | 5.231170000  | 8.320056000  | 4.025837000  |
| 6                                         | 12.179989000 | 8.738072000  | 1.143073000  |
| 6                                         | 12.812727000 | 8.102325000  | 2.300607000  |
| 6                                         | 14.067193000 | 8.552808000  | 2.780557000  |
| 6                                         | 14.697267000 | 7.915707000  | 3.850620000  |
| 6                                         | 14.060688000 | 6.832221000  | 4.452534000  |
| 6                                         | 12.820438000 | 6.359223000  | 4.015395000  |
| 6                                         | 12.206510000 | 6.990047000  | 2.938089000  |
| 1                                         | 12.339906000 | 5.527120000  | 4.513516000  |
| 17                                        | 14.871567000 | 6.003290000  | 5.855752000  |
| 1                                         | 15.665388000 | 8.252641000  | 4.198035000  |
| 1                                         | 14.573807000 | 9.373631000  | 2.289468000  |
| 1                                         | 11.222807000 | 6.669827000  | 2.620660000  |
| 6                                         | 12.464048000 | 10.143009000 | 0.849833000  |
| 6                                         | 12.589193000 | 11.091020000 | 1.897765000  |
| 1                                         | 12.387018000 | 10.789780000 | 2.917563000  |
| 6                                         | 12.895490000 | 12.420963000 | 1.628477000  |
| 1                                         | 12.969106000 | 13.138961000 | 2.435287000  |
| 6                                         | 13.091163000 | 12.808368000 | 0.300420000  |
| 17                                        | 13.497163000 | 14.547493000 | -0.056429000 |
| 6                                         | 12.986644000 | 11.910492000 | -0.760066000 |
| 1                                         | 13.158500000 | 12.233510000 | -1.778626000 |
| 6                                         | 12.666870000 | 10.581054000 | -0.482514000 |
| 1                                         | 12.618494000 | 9.873476000  | -1.300074000 |
| 6                                         | 11.552740000 | 7.898551000  | 0.118838000  |
| 6                                         | 12.015350000 | 6.580674000  | -0.115768000 |
| 6                                         | 11.464052000 | 5.796179000  | -1.130142000 |
| 1                                         | 11.836028000 | 4.796913000  | -1.315782000 |
| 1                                         | 12.837224000 | 6.182645000  | 0.465389000  |
| 6                                         | 10.505594000 | 8.401026000  | -0.694724000 |
| 1                                         | 10.099584000 | 9.382302000  | -0.486558000 |
| 6                                         | 9.941006000  | 7.620594000  | -1.698560000 |
| 1                                         | 9.126815000  | 8.001846000  | -2.301186000 |
| 6                                         | 10.434747000 | 6.329048000  | -1.902639000 |
| 17                                        | 9.704358000  | 5.308486000  | -3.221989000 |
| <b><sup>5</sup>P<sub>Cl,1Cl,NH:</sub></b> |              |              |              |
| 26                                        | 8.576411000  | 9.309028000  | 5.272914000  |
| 17                                        | 10.837811000 | 8.454885000  | 1.355052000  |
| 8                                         | 8.609106000  | 7.370807000  | 5.419809000  |

|   |              |              |              |
|---|--------------|--------------|--------------|
| 1 | 9.398137000  | 6.969061000  | 5.830943000  |
| 6 | 7.924457000  | 6.126831000  | 8.782840000  |
| 1 | 8.276124000  | 6.518070000  | 7.822137000  |
| 1 | 7.333158000  | 5.223108000  | 8.584165000  |
| 1 | 8.800567000  | 5.830644000  | 9.373946000  |
| 6 | 6.587343000  | 6.532459000  | 10.877116000 |
| 1 | 7.435087000  | 6.200721000  | 11.489331000 |
| 1 | 5.952210000  | 5.659629000  | 10.678850000 |
| 1 | 6.003533000  | 7.250271000  | 11.467468000 |
| 6 | 7.958792000  | 8.398335000  | 9.889416000  |
| 1 | 8.354597000  | 8.867484000  | 8.982962000  |
| 1 | 8.811782000  | 8.099134000  | 10.511814000 |
| 1 | 7.387587000  | 9.155870000  | 10.440211000 |
| 6 | 7.082074000  | 7.170440000  | 9.555687000  |
| 6 | 5.826471000  | 7.575747000  | 8.724157000  |
| 1 | 5.280753000  | 6.650385000  | 8.492166000  |
| 1 | 5.155208000  | 8.158342000  | 9.369561000  |
| 6 | 6.234439000  | 9.823984000  | 7.425795000  |
| 6 | 5.559837000  | 10.640125000 | 8.344196000  |
| 1 | 4.938546000  | 10.194177000 | 9.109658000  |
| 6 | 5.689738000  | 12.028686000 | 8.270997000  |
| 1 | 5.182454000  | 12.664636000 | 8.988327000  |
| 6 | 6.468235000  | 12.587727000 | 7.257718000  |
| 1 | 6.579816000  | 13.661889000 | 7.165558000  |
| 6 | 7.104752000  | 11.737624000 | 6.346673000  |
| 6 | 7.826773000  | 12.342456000 | 5.156206000  |
| 1 | 7.056277000  | 12.609347000 | 4.420997000  |
| 1 | 8.297157000  | 13.282620000 | 5.464419000  |
| 6 | 8.574663000  | 11.372516000 | 3.012532000  |
| 1 | 9.427459000  | 10.846069000 | 2.571442000  |
| 1 | 8.521136000  | 12.368492000 | 2.548696000  |
| 6 | 7.324583000  | 10.588938000 | 2.700287000  |
| 6 | 6.398769000  | 11.041826000 | 1.760697000  |
| 1 | 6.542861000  | 12.001126000 | 1.277171000  |
| 6 | 5.291734000  | 10.239061000 | 1.461963000  |
| 1 | 4.548813000  | 10.570116000 | 0.744541000  |
| 6 | 5.162942000  | 9.007873000  | 2.099404000  |
| 1 | 4.321552000  | 8.360857000  | 1.881532000  |
| 6 | 6.126613000  | 8.591766000  | 3.038267000  |
| 6 | 5.945165000  | 6.074541000  | 2.694253000  |
| 1 | 6.779062000  | 6.166833000  | 1.982652000  |
| 1 | 5.021262000  | 6.161652000  | 2.103721000  |
| 6 | 5.991663000  | 4.642842000  | 3.309917000  |
| 6 | 5.710278000  | 3.627784000  | 2.174788000  |
| 1 | 5.775366000  | 2.598578000  | 2.549411000  |
| 1 | 6.439031000  | 3.738199000  | 1.361692000  |
| 1 | 4.707003000  | 3.772908000  | 1.754134000  |
| 6 | 4.913588000  | 4.477268000  | 4.407157000  |
| 1 | 5.118292000  | 5.115124000  | 5.274278000  |
| 1 | 4.884325000  | 3.438142000  | 4.758003000  |
| 1 | 3.916872000  | 4.731661000  | 4.023434000  |
| 6 | 7.390677000  | 4.353187000  | 3.904999000  |
| 1 | 7.671556000  | 5.091461000  | 4.663349000  |
| 1 | 8.155085000  | 4.376439000  | 3.116877000  |
| 1 | 7.411900000  | 3.355507000  | 4.362394000  |
| 6 | 10.251354000 | 11.811802000 | 4.766945000  |
| 1 | 10.406175000 | 12.898441000 | 4.720154000  |
| 1 | 10.845270000 | 11.362430000 | 3.968241000  |
| 6 | 10.773871000 | 11.177112000 | 6.098555000  |
| 6 | 10.419732000 | 11.988574000 | 7.371338000  |
| 6 | 10.249486000 | 11.286618000 | 8.577805000  |
| 1 | 10.318857000 | 10.206407000 | 8.552819000  |
| 6 | 9.986412000  | 11.958486000 | 9.775741000  |
| 1 | 9.859317000  | 11.392214000 | 10.693756000 |
| 6 | 9.885121000  | 13.356347000 | 9.794375000  |
| 1 | 9.677756000  | 13.880177000 | 10.722329000 |
| 6 | 10.057818000 | 14.069634000 | 8.603492000  |
| 1 | 9.985264000  | 15.153233000 | 8.601503000  |
| 6 | 10.327566000 | 13.392204000 | 7.405423000  |
| 1 | 10.464340000 | 13.978958000 | 6.503202000  |
| 6 | 12.324840000 | 11.109390000 | 5.984914000  |
| 6 | 13.123422000 | 12.266605000 | 5.936560000  |
| 1 | 12.669030000 | 13.248305000 | 6.018921000  |
| 6 | 14.514803000 | 12.172996000 | 5.804406000  |
| 1 | 15.114184000 | 13.078111000 | 5.773928000  |

|    |              |              |              |
|----|--------------|--------------|--------------|
| 6  | 15.133077000 | 10.917660000 | 5.722294000  |
| 1  | 16.212176000 | 10.844277000 | 5.628204000  |
| 6  | 14.345416000 | 9.760109000  | 5.771648000  |
| 1  | 14.813898000 | 8.781736000  | 5.715260000  |
| 6  | 12.953512000 | 9.857199000  | 5.899170000  |
| 1  | 12.328857000 | 8.973773000  | 5.942524000  |
| 1  | 5.190471000  | 8.127368000  | 6.743306000  |
| 7  | 7.009769000  | 10.387160000 | 6.446611000  |
| 7  | 8.825182000  | 11.465752000 | 4.480404000  |
| 7  | 7.183906000  | 9.396728000  | 3.346559000  |
| 1  | 6.884426000  | 7.116906000  | 4.370534000  |
| 8  | 10.234431000 | 9.867063000  | 6.171243000  |
| 6  | 6.065538000  | 8.317330000  | 7.385861000  |
| 1  | 6.917058000  | 7.882231000  | 6.849841000  |
| 1  | 5.115197000  | 7.232186000  | 4.333695000  |
| 6  | 6.021190000  | 7.243066000  | 3.711222000  |
| 6  | 12.427682000 | 8.456478000  | 0.038294000  |
| 6  | 13.222698000 | 7.220347000  | 0.425912000  |
| 6  | 14.612641000 | 7.286373000  | 0.624003000  |
| 6  | 15.354311000 | 6.135886000  | 0.924749000  |
| 6  | 14.689122000 | 4.920566000  | 1.027273000  |
| 6  | 13.312229000 | 4.812794000  | 0.832534000  |
| 6  | 12.587627000 | 5.965544000  | 0.528385000  |
| 1  | 12.813159000 | 3.855889000  | 0.918795000  |
| 17 | 15.646597000 | 3.413209000  | 1.428529000  |
| 1  | 16.424855000 | 6.198594000  | 1.073449000  |
| 1  | 15.135004000 | 8.229785000  | 0.535676000  |
| 1  | 11.516457000 | 5.891237000  | 0.386328000  |
| 6  | 13.132746000 | 9.772688000  | 0.320724000  |
| 6  | 13.505366000 | 10.115126000 | 1.636944000  |
| 1  | 13.241737000 | 9.463394000  | 2.461058000  |
| 6  | 14.196903000 | 11.296666000 | 1.907656000  |
| 1  | 14.470262000 | 11.550564000 | 2.924308000  |
| 6  | 14.523084000 | 12.136986000 | 0.843505000  |
| 17 | 15.426378000 | 13.691912000 | 1.189591000  |
| 6  | 14.185948000 | 11.830818000 | -0.469014000 |
| 1  | 14.455610000 | 12.492799000 | -1.282227000 |
| 6  | 13.487190000 | 10.643087000 | -0.724635000 |
| 1  | 13.234827000 | 10.401865000 | -1.748753000 |
| 6  | 11.770328000 | 8.375739000  | -1.329985000 |
| 6  | 12.214647000 | 7.451164000  | -2.290989000 |
| 6  | 11.649954000 | 7.414677000  | -3.573158000 |
| 1  | 12.001480000 | 6.699151000  | -4.305698000 |
| 1  | 13.011898000 | 6.758206000  | -2.056817000 |
| 6  | 10.745821000 | 9.276166000  | -1.686715000 |
| 1  | 10.383839000 | 9.993588000  | -0.960568000 |
| 6  | 10.170404000 | 9.247862000  | -2.957366000 |
| 1  | 9.377460000  | 9.937421000  | -3.217959000 |
| 6  | 10.634897000 | 8.311742000  | -3.881055000 |
| 17 | 9.883211000  | 8.267530000  | -5.549299000 |



Data for 1<sub>Cl,NE</sub>:

<sup>5</sup>Re<sub>1Cl,NE</sub>:

|    |              |              |              |
|----|--------------|--------------|--------------|
| 26 | 6.111923000  | 13.179198000 | 4.086169000  |
| 17 | 7.940986000  | 13.315341000 | 2.331739000  |
| 8  | 5.316759000  | 11.589319000 | 3.466321000  |
| 1  | 5.790913000  | 11.010950000 | 2.839794000  |
| 6  | 3.365275000  | 12.626808000 | 5.433360000  |
| 6  | 2.247790000  | 12.844403000 | 6.235092000  |
| 1  | 1.455606000  | 12.106880000 | 6.273772000  |
| 6  | 2.173888000  | 14.030325000 | 6.979038000  |
| 1  | 1.315487000  | 14.231223000 | 7.610150000  |
| 6  | 3.217333000  | 14.954361000 | 6.898078000  |
| 1  | 3.185197000  | 15.879690000 | 7.462152000  |
| 6  | 4.319482000  | 14.675047000 | 6.077725000  |
| 6  | 5.481768000  | 15.642649000 | 5.989790000  |
| 1  | 5.093065000  | 16.643684000 | 5.764612000  |
| 1  | 5.948653000  | 15.707864000 | 6.977806000  |
| 6  | 6.528887000  | 16.209470000 | 3.815144000  |
| 1  | 7.464683000  | 16.052884000 | 3.269308000  |
| 1  | 6.494961000  | 17.259468000 | 4.132968000  |
| 6  | 5.384755000  | 15.894741000 | 2.880892000  |
| 6  | 4.731233000  | 16.862869000 | 2.112658000  |
| 1  | 5.001276000  | 17.907330000 | 2.215723000  |
| 6  | 3.737093000  | 16.459933000 | 1.214336000  |
| 1  | 3.219484000  | 17.195121000 | 0.608661000  |
| 6  | 3.415354000  | 15.101047000 | 1.108967000  |
| 1  | 2.650255000  | 14.756940000 | 0.424092000  |
| 6  | 4.096178000  | 14.185902000 | 1.911755000  |
| 6  | 7.890842000  | 15.089462000 | 5.576321000  |
| 1  | 8.139513000  | 15.920294000 | 6.248491000  |
| 1  | 8.595628000  | 15.095343000 | 4.743896000  |
| 6  | 8.018000000  | 13.700065000 | 6.289934000  |
| 6  | 7.478503000  | 13.721798000 | 7.744125000  |
| 6  | 6.520617000  | 12.782615000 | 8.155933000  |
| 1  | 6.152383000  | 12.068883000 | 7.430564000  |
| 6  | 6.047516000  | 12.774230000 | 9.474855000  |
| 1  | 5.306313000  | 12.039215000 | 9.774071000  |
| 6  | 6.525178000  | 13.705864000 | 10.403451000 |
| 1  | 6.158266000  | 13.700721000 | 11.424956000 |
| 6  | 7.486531000  | 14.643794000 | 10.003739000 |
| 1  | 7.870278000  | 15.368068000 | 10.715698000 |
| 6  | 7.961959000  | 14.648122000 | 8.687528000  |
| 1  | 8.721960000  | 15.370622000 | 8.407053000  |
| 6  | 9.501367000  | 13.264168000 | 6.332501000  |
| 6  | 10.552569000 | 14.187415000 | 6.470350000  |
| 1  | 10.351221000 | 15.252318000 | 6.519624000  |
| 6  | 11.882562000 | 13.751093000 | 6.540041000  |
| 1  | 12.681174000 | 14.479533000 | 6.640751000  |
| 6  | 12.180881000 | 12.385519000 | 6.474604000  |
| 1  | 13.210809000 | 12.047128000 | 6.528839000  |
| 6  | 11.138566000 | 11.459218000 | 6.335660000  |
| 1  | 11.358959000 | 10.397566000 | 6.279184000  |
| 6  | 9.811480000  | 11.895399000 | 6.265220000  |
| 1  | 9.003200000  | 11.184746000 | 6.142856000  |
| 7  | 4.374754000  | 13.529964000 | 5.365178000  |
| 7  | 6.530341000  | 15.280229000 | 4.984953000  |
| 7  | 5.058898000  | 14.583939000 | 2.774873000  |
| 8  | 7.274627000  | 12.749746000 | 5.516916000  |
| 1  | 3.499705000  | 11.745954000 | 4.818433000  |
| 1  | 3.897105000  | 13.122090000 | 1.890838000  |
| 6  | 12.901300000 | 15.940940000 | 2.775743000  |
| 6  | 14.063996000 | 16.365429000 | 3.563487000  |
| 6  | 11.739011000 | 16.825923000 | 2.657642000  |
| 6  | 12.906970000 | 14.636695000 | 2.106531000  |
| 6  | 14.829128000 | 15.431569000 | 4.309936000  |
| 6  | 15.933510000 | 15.830266000 | 5.064796000  |
| 6  | 16.289265000 | 17.178036000 | 5.073151000  |
| 6  | 15.574127000 | 18.134312000 | 4.354001000  |
| 6  | 14.467583000 | 17.725173000 | 3.608531000  |
| 1  | 13.922388000 | 18.464031000 | 3.033175000  |
| 1  | 15.876151000 | 19.174345000 | 4.364544000  |
| 17 | 17.740503000 | 17.709395000 | 6.058959000  |
| 1  | 16.497077000 | 15.105726000 | 5.639676000  |
| 1  | 14.538333000 | 14.387810000 | 4.317252000  |
| 6  | 14.106700000 | 14.081462000 | 1.588563000  |

|    |              |              |              |
|----|--------------|--------------|--------------|
| 6  | 11.715967000 | 13.880246000 | 1.952540000  |
| 6  | 11.718887000 | 12.636949000 | 1.318579000  |
| 6  | 12.922578000 | 12.138397000 | 0.824325000  |
| 6  | 14.120062000 | 12.841983000 | 0.947904000  |
| 1  | 15.042230000 | 12.440197000 | 0.546197000  |
| 17 | 12.934434000 | 10.507535000 | -0.013943000 |
| 1  | 10.798263000 | 12.073936000 | 1.227067000  |
| 1  | 10.778376000 | 14.248031000 | 2.352418000  |
| 6  | 10.956202000 | 16.865062000 | 1.474060000  |
| 6  | 11.353862000 | 17.681246000 | 3.723661000  |
| 6  | 10.252091000 | 18.531105000 | 3.617596000  |
| 6  | 9.521832000  | 18.535962000 | 2.430097000  |
| 6  | 9.855623000  | 17.714941000 | 1.354014000  |
| 1  | 9.280176000  | 17.742773000 | 0.436948000  |
| 1  | 11.228669000 | 16.240697000 | 0.631709000  |
| 1  | 11.912845000 | 17.662589000 | 4.651654000  |
| 1  | 9.967349000  | 19.168961000 | 4.445343000  |
| 17 | 8.078601000  | 19.659270000 | 2.279033000  |
| 1  | 15.032621000 | 14.638738000 | 1.668264000  |

<sup>5</sup>TS<sub>OH,1Cl,NE<sup>-</sup></sub>

|    |              |              |              |
|----|--------------|--------------|--------------|
| 26 | 6.926953000  | 12.526308000 | 4.436808000  |
| 17 | 9.422510000  | 12.434713000 | 3.666688000  |
| 8  | 6.302540000  | 10.685421000 | 4.017479000  |
| 1  | 5.762984000  | 10.325427000 | 4.749869000  |
| 6  | 3.680429000  | 12.369980000 | 4.364753000  |
| 6  | 2.365500000  | 12.825851000 | 4.416525000  |
| 1  | 1.548099000  | 12.156512000 | 4.177397000  |
| 6  | 2.133618000  | 14.160478000 | 4.774217000  |
| 1  | 1.123815000  | 14.552682000 | 4.819473000  |
| 6  | 3.222982000  | 14.982585000 | 5.064680000  |
| 1  | 3.076342000  | 16.021910000 | 5.337443000  |
| 6  | 4.522496000  | 14.456577000 | 5.002512000  |
| 6  | 5.707835000  | 15.328453000 | 5.359103000  |
| 1  | 5.579505000  | 16.312127000 | 4.887226000  |
| 1  | 5.684112000  | 15.501304000 | 6.439536000  |
| 6  | 7.611695000  | 15.407522000 | 3.779095000  |
| 1  | 8.668309000  | 15.126094000 | 3.728029000  |
| 1  | 7.547862000  | 16.503349000 | 3.830787000  |
| 6  | 6.937439000  | 14.898144000 | 2.526133000  |
| 6  | 6.708138000  | 15.702039000 | 1.405218000  |
| 1  | 6.970012000  | 16.753466000 | 1.432486000  |
| 6  | 6.140463000  | 15.132161000 | 0.260360000  |
| 1  | 5.956930000  | 15.739961000 | -0.618454000 |
| 6  | 5.806017000  | 13.773170000 | 0.266333000  |
| 1  | 5.361826000  | 13.299959000 | -0.600707000 |
| 6  | 6.049342000  | 13.028292000 | 1.421091000  |
| 6  | 7.998683000  | 14.722807000 | 6.144088000  |
| 1  | 8.012271000  | 15.685681000 | 6.672056000  |
| 1  | 8.986257000  | 14.545220000 | 5.716759000  |
| 6  | 7.690600000  | 13.526098000 | 7.112769000  |
| 6  | 6.579441000  | 13.867047000 | 8.144581000  |
| 6  | 5.460700000  | 13.029535000 | 8.271598000  |
| 1  | 5.390068000  | 12.168920000 | 7.619466000  |
| 6  | 4.460833000  | 13.303866000 | 9.214058000  |
| 1  | 3.603646000  | 12.641866000 | 9.296213000  |
| 6  | 4.562747000  | 14.423983000 | 10.046924000 |
| 1  | 3.788123000  | 14.638796000 | 10.776454000 |
| 6  | 5.678471000  | 15.264379000 | 9.933471000  |
| 1  | 5.773454000  | 16.133469000 | 10.577460000 |
| 6  | 6.678850000  | 14.985044000 | 8.995091000  |
| 1  | 7.543210000  | 15.639369000 | 8.939669000  |
| 6  | 8.971048000  | 13.163567000 | 7.905250000  |
| 6  | 9.920231000  | 14.124733000 | 8.296482000  |
| 1  | 9.797406000  | 15.167410000 | 8.022869000  |
| 6  | 11.048839000 | 13.755828000 | 9.041359000  |
| 1  | 11.772370000 | 14.512887000 | 9.328430000  |
| 6  | 11.245397000 | 12.420671000 | 9.410302000  |
| 1  | 12.119799000 | 12.134631000 | 9.986405000  |
| 6  | 10.304988000 | 11.456068000 | 9.024477000  |
| 1  | 10.450817000 | 10.415713000 | 9.299756000  |
| 6  | 9.180690000  | 11.825581000 | 8.278803000  |
| 1  | 8.459293000  | 11.083234000 | 7.960682000  |
| 7  | 4.738245000  | 13.166539000 | 4.658630000  |
| 7  | 7.040482000  | 14.765519000 | 4.998232000  |

|    |              |              |              |
|----|--------------|--------------|--------------|
| 7  | 6.608227000  | 13.581382000 | 2.521389000  |
| 8  | 7.288880000  | 12.411318000 | 6.316455000  |
| 6  | 6.844818000  | 8.630932000  | 3.329211000  |
| 6  | 8.051876000  | 8.408296000  | 4.156906000  |
| 6  | 9.277696000  | 8.019761000  | 3.569646000  |
| 6  | 8.007678000  | 8.534074000  | 5.566070000  |
| 6  | 9.130351000  | 8.283890000  | 6.354798000  |
| 6  | 10.316643000 | 7.901593000  | 5.729637000  |
| 6  | 10.409984000 | 7.764230000  | 4.348016000  |
| 1  | 11.338250000 | 7.457877000  | 3.882240000  |
| 17 | 11.792864000 | 7.566751000  | 6.759216000  |
| 1  | 9.081585000  | 8.391365000  | 7.430953000  |
| 1  | 7.093573000  | 8.853149000  | 6.051024000  |
| 1  | 9.346341000  | 7.892369000  | 2.496951000  |
| 1  | 8.470229000  | 10.518970000 | 2.229188000  |
| 6  | 7.946216000  | 9.931423000  | 1.483104000  |
| 6  | 7.026023000  | 8.939172000  | 1.892366000  |
| 6  | 8.160513000  | 10.201501000 | 0.129781000  |
| 1  | 8.858912000  | 10.972910000 | -0.170622000 |
| 6  | 7.452532000  | 9.469472000  | -0.821871000 |
| 17 | 7.731574000  | 9.818144000  | -2.600366000 |
| 6  | 6.540232000  | 8.480401000  | -0.464877000 |
| 1  | 6.010235000  | 7.914545000  | -1.220919000 |
| 6  | 6.329991000  | 8.221764000  | 0.892953000  |
| 1  | 5.637962000  | 7.436161000  | 1.170262000  |
| 6  | 5.565999000  | 8.016784000  | 3.755841000  |
| 6  | 5.524177000  | 6.912423000  | 4.637754000  |
| 1  | 6.444447000  | 6.486051000  | 5.016217000  |
| 6  | 4.334246000  | 8.510952000  | 3.258141000  |
| 1  | 4.337665000  | 9.359095000  | 2.585443000  |
| 6  | 3.117212000  | 7.939599000  | 3.630116000  |
| 1  | 2.183796000  | 8.333297000  | 3.247409000  |
| 6  | 3.126938000  | 6.855440000  | 4.507291000  |
| 6  | 4.311301000  | 6.328403000  | 5.014534000  |
| 1  | 4.297465000  | 5.475958000  | 5.682151000  |
| 17 | 1.534151000  | 6.099798000  | 4.999473000  |
| 1  | 3.923920000  | 11.357927000 | 4.073145000  |
| 1  | 5.806034000  | 11.976147000 | 1.489431000  |

<sup>5</sup>P<sub>OH,1Cl,NE</sub>:

|    |              |              |             |
|----|--------------|--------------|-------------|
| 26 | 7.285149000  | 12.578445000 | 4.586658000 |
| 17 | 8.570239000  | 10.815134000 | 3.288614000 |
| 8  | 6.210033000  | 8.696735000  | 2.712630000 |
| 1  | 7.005976000  | 9.222870000  | 2.977995000 |
| 6  | 5.228040000  | 11.869046000 | 2.289789000 |
| 6  | 4.002619000  | 11.899685000 | 1.625221000 |
| 1  | 3.880240000  | 11.364212000 | 0.692070000 |
| 6  | 2.951007000  | 12.633863000 | 2.185773000 |
| 1  | 1.988305000  | 12.683215000 | 1.689747000 |
| 6  | 3.155892000  | 13.309032000 | 3.393079000 |
| 1  | 2.361058000  | 13.888535000 | 3.847995000 |
| 6  | 4.404396000  | 13.232741000 | 4.018742000 |
| 6  | 4.668719000  | 13.885064000 | 5.360642000 |
| 1  | 4.000259000  | 14.747132000 | 5.500091000 |
| 1  | 4.436444000  | 13.166552000 | 6.152162000 |
| 6  | 6.428125000  | 15.502746000 | 4.743731000 |
| 1  | 6.217924000  | 16.405721000 | 5.333577000 |
| 1  | 5.770675000  | 15.534745000 | 3.866327000 |
| 6  | 7.863742000  | 15.514493000 | 4.260976000 |
| 6  | 8.576828000  | 16.704609000 | 4.085167000 |
| 1  | 8.121701000  | 17.651152000 | 4.352928000 |
| 6  | 9.874028000  | 16.653938000 | 3.564485000 |
| 1  | 10.440523000 | 17.567253000 | 3.422330000 |
| 6  | 10.432811000 | 15.413261000 | 3.235663000 |
| 1  | 11.434998000 | 15.337510000 | 2.832481000 |
| 6  | 9.675594000  | 14.260875000 | 3.444533000 |
| 6  | 6.597619000  | 14.312771000 | 6.912689000 |
| 1  | 5.881337000  | 14.842614000 | 7.554800000 |
| 1  | 7.521142000  | 14.896729000 | 6.891081000 |
| 6  | 6.966301000  | 12.892336000 | 7.473569000 |
| 6  | 5.724135000  | 12.123706000 | 8.004588000 |
| 6  | 5.511560000  | 10.793658000 | 7.607228000 |
| 1  | 6.215690000  | 10.345255000 | 6.917873000 |
| 6  | 4.418694000  | 10.063823000 | 8.092710000 |
| 1  | 4.276492000  | 9.035605000  | 7.773663000 |

|    |              |              |              |
|----|--------------|--------------|--------------|
| 6  | 3.517088000  | 10.653065000 | 8.986662000  |
| 1  | 2.668813000  | 10.089800000 | 9.362729000  |
| 6  | 3.723161000  | 11.976935000 | 9.396894000  |
| 1  | 3.034490000  | 12.444239000 | 10.094346000 |
| 6  | 4.818754000  | 12.702564000 | 8.914663000  |
| 1  | 4.963492000  | 13.721009000 | 9.260748000  |
| 6  | 7.964217000  | 13.057668000 | 8.648077000  |
| 6  | 7.867711000  | 14.100065000 | 9.587821000  |
| 1  | 7.087351000  | 14.849770000 | 9.506444000  |
| 6  | 8.780403000  | 14.196561000 | 10.646884000 |
| 1  | 8.691713000  | 15.012023000 | 11.358424000 |
| 6  | 9.801526000  | 13.249823000 | 10.787284000 |
| 1  | 10.507706000 | 13.324068000 | 11.608362000 |
| 6  | 9.904665000  | 12.207875000 | 9.856312000  |
| 1  | 10.694611000 | 11.468938000 | 9.953044000  |
| 6  | 8.995695000  | 12.115617000 | 8.796629000  |
| 1  | 9.075195000  | 11.323417000 | 8.062639000  |
| 7  | 5.423919000  | 12.522900000 | 3.461862000  |
| 7  | 6.096363000  | 14.265964000 | 5.505726000  |
| 7  | 8.418155000  | 14.313333000 | 3.947960000  |
| 8  | 7.592893000  | 12.150040000 | 6.429463000  |
| 6  | 6.434872000  | 7.256494000  | 2.884508000  |
| 6  | 7.720463000  | 6.855063000  | 2.132209000  |
| 6  | 8.574893000  | 5.839823000  | 2.589414000  |
| 6  | 8.019713000  | 7.495108000  | 0.916856000  |
| 6  | 9.149294000  | 7.140123000  | 0.173699000  |
| 6  | 9.973969000  | 6.128023000  | 0.659925000  |
| 6  | 9.709297000  | 5.467786000  | 1.854520000  |
| 1  | 10.365892000 | 4.685470000  | 2.214453000  |
| 17 | 11.460177000 | 5.652627000  | -0.307862000 |
| 1  | 9.377297000  | 7.641619000  | -0.758715000 |
| 1  | 7.369142000  | 8.283563000  | 0.558624000  |
| 1  | 8.370115000  | 5.332373000  | 3.524653000  |
| 1  | 3.983601000  | 8.344871000  | 2.366580000  |
| 6  | 4.020033000  | 7.307214000  | 2.064381000  |
| 6  | 5.211553000  | 6.584559000  | 2.234900000  |
| 6  | 2.888888000  | 6.706494000  | 1.498092000  |
| 1  | 1.973904000  | 7.270812000  | 1.365669000  |
| 6  | 2.965600000  | 5.372786000  | 1.109389000  |
| 17 | 1.487283000  | 4.575676000  | 0.365109000  |
| 6  | 4.128258000  | 4.623640000  | 1.263278000  |
| 1  | 4.167962000  | 3.587909000  | 0.949732000  |
| 6  | 5.251496000  | 5.240861000  | 1.826702000  |
| 1  | 6.161780000  | 4.662861000  | 1.937204000  |
| 6  | 6.531339000  | 6.959865000  | 4.398007000  |
| 6  | 7.536805000  | 7.598486000  | 5.150978000  |
| 1  | 8.243128000  | 8.265558000  | 4.667733000  |
| 6  | 5.632953000  | 6.115098000  | 5.066370000  |
| 1  | 4.847001000  | 5.610468000  | 4.519476000  |
| 6  | 5.729467000  | 5.901049000  | 6.449399000  |
| 1  | 5.031617000  | 5.243658000  | 6.953080000  |
| 6  | 6.736536000  | 6.548039000  | 7.154686000  |
| 6  | 7.646729000  | 7.398735000  | 6.529914000  |
| 1  | 8.424064000  | 7.894297000  | 7.098191000  |
| 17 | 6.876870000  | 6.272621000  | 8.964015000  |
| 1  | 6.074375000  | 11.313204000 | 1.909591000  |
| 1  | 10.050204000 | 13.270657000 | 3.217475000  |

<sup>5</sup>TS<sub>Cl,1Cl,NE</sub>:

|    |             |              |             |
|----|-------------|--------------|-------------|
| 26 | 7.223899000 | 14.339812000 | 4.446303000 |
| 17 | 9.718955000 | 15.948683000 | 3.764422000 |
| 8  | 7.171546000 | 13.583547000 | 2.648990000 |
| 1  | 7.264987000 | 12.617563000 | 2.540960000 |
| 6  | 4.283760000 | 13.264648000 | 4.175297000 |
| 6  | 2.918935000 | 13.156104000 | 4.437004000 |
| 1  | 2.271748000 | 12.631178000 | 3.744775000 |
| 6  | 2.410497000 | 13.748670000 | 5.600648000 |
| 1  | 1.352090000 | 13.692369000 | 5.829704000 |
| 6  | 3.281995000 | 14.422286000 | 6.461009000 |
| 1  | 2.914284000 | 14.896845000 | 7.364104000 |
| 6  | 4.646811000 | 14.481786000 | 6.147256000 |
| 6  | 5.647029000 | 15.118303000 | 7.089304000 |
| 1  | 5.164797000 | 15.939579000 | 7.639114000 |
| 1  | 5.925088000 | 14.364409000 | 7.832133000 |
| 6  | 6.827848000 | 17.019477000 | 6.017475000 |

|    |              |              |              |
|----|--------------|--------------|--------------|
| 1  | 7.856599000  | 17.381085000 | 5.907986000  |
| 1  | 6.342273000  | 17.640071000 | 6.785108000  |
| 6  | 6.136739000  | 17.206100000 | 4.684821000  |
| 6  | 5.396346000  | 18.351747000 | 4.373469000  |
| 1  | 5.240285000  | 19.115896000 | 5.126734000  |
| 6  | 4.867617000  | 18.493770000 | 3.085772000  |
| 1  | 4.291994000  | 19.375210000 | 2.825771000  |
| 6  | 5.086493000  | 17.482822000 | 2.141620000  |
| 1  | 4.690695000  | 17.559352000 | 1.135980000  |
| 6  | 5.820473000  | 16.358009000 | 2.520555000  |
| 6  | 8.132356000  | 15.274922000 | 7.217080000  |
| 1  | 8.015237000  | 15.566150000 | 8.270541000  |
| 1  | 8.935191000  | 15.874013000 | 6.784855000  |
| 6  | 8.562794000  | 13.769446000 | 7.066177000  |
| 6  | 7.835148000  | 12.827841000 | 8.069958000  |
| 6  | 7.268378000  | 11.631443000 | 7.601329000  |
| 1  | 7.330649000  | 11.422616000 | 6.540845000  |
| 6  | 6.639005000  | 10.739244000 | 8.478510000  |
| 1  | 6.208473000  | 9.819619000  | 8.092827000  |
| 6  | 6.564215000  | 11.028074000 | 9.846414000  |
| 1  | 6.075292000  | 10.339037000 | 10.528070000 |
| 6  | 7.129955000  | 12.215734000 | 10.328003000 |
| 1  | 7.082131000  | 12.451477000 | 11.386990000 |
| 6  | 7.762480000  | 13.103632000 | 9.449127000  |
| 1  | 8.202154000  | 14.009971000 | 9.852278000  |
| 6  | 10.087517000 | 13.666874000 | 7.347693000  |
| 6  | 10.714222000 | 14.365877000 | 8.395786000  |
| 1  | 10.139238000 | 15.017566000 | 9.045499000  |
| 6  | 12.092149000 | 14.242553000 | 8.618069000  |
| 1  | 12.556456000 | 14.795507000 | 9.429250000  |
| 6  | 12.868063000 | 13.413804000 | 7.798685000  |
| 1  | 13.935359000 | 13.316380000 | 7.971962000  |
| 6  | 12.252503000 | 12.712159000 | 6.753260000  |
| 1  | 12.843361000 | 12.067902000 | 6.108683000  |
| 6  | 10.876039000 | 12.840393000 | 6.530820000  |
| 1  | 10.391736000 | 12.319910000 | 5.714250000  |
| 7  | 5.126575000  | 13.908620000 | 5.018443000  |
| 7  | 6.900111000  | 15.593044000 | 6.436217000  |
| 7  | 6.334527000  | 16.229627000 | 3.766834000  |
| 8  | 8.292900000  | 13.363723000 | 5.734769000  |
| 1  | 4.744698000  | 12.864687000 | 3.280546000  |
| 1  | 6.017590000  | 15.523616000 | 1.858793000  |
| 6  | 11.459915000 | 15.568924000 | 2.125442000  |
| 6  | 12.568670000 | 16.316905000 | 2.778665000  |
| 6  | 10.788772000 | 16.184485000 | 0.949028000  |
| 6  | 11.537401000 | 14.078775000 | 2.168684000  |
| 6  | 12.996668000 | 15.958478000 | 4.079006000  |
| 6  | 14.059084000 | 16.614068000 | 4.696665000  |
| 6  | 14.710161000 | 17.635348000 | 4.002190000  |
| 6  | 14.332354000 | 18.012461000 | 2.718307000  |
| 6  | 13.258697000 | 17.350921000 | 2.111260000  |
| 1  | 12.981838000 | 17.629705000 | 1.102796000  |
| 1  | 14.860120000 | 18.797818000 | 2.192100000  |
| 17 | 16.105916000 | 18.501268000 | 4.807632000  |
| 1  | 14.366042000 | 16.339800000 | 5.698062000  |
| 1  | 12.468866000 | 15.181287000 | 4.618134000  |
| 6  | 12.795659000 | 13.441579000 | 2.238172000  |
| 6  | 10.378742000 | 13.273968000 | 2.069483000  |
| 6  | 10.479989000 | 11.881692000 | 2.046909000  |
| 6  | 11.741843000 | 11.291653000 | 2.112490000  |
| 6  | 12.905565000 | 12.047195000 | 2.205088000  |
| 1  | 13.877329000 | 11.571666000 | 2.247041000  |
| 17 | 11.869581000 | 9.465275000  | 2.080877000  |
| 1  | 9.587346000  | 11.270731000 | 1.993777000  |
| 1  | 9.385540000  | 13.717582000 | 2.071004000  |
| 6  | 10.584193000 | 15.447252000 | -0.236689000 |
| 6  | 10.373904000 | 17.536921000 | 0.973076000  |
| 6  | 9.778741000  | 18.130840000 | -0.137839000 |
| 6  | 9.597979000  | 17.364613000 | -1.290706000 |
| 6  | 9.991635000  | 16.032977000 | -1.360839000 |
| 1  | 9.848879000  | 15.458033000 | -2.267030000 |
| 1  | 10.907140000 | 14.416390000 | -0.297808000 |
| 1  | 10.486158000 | 18.111565000 | 1.883808000  |
| 1  | 9.453856000  | 19.162978000 | -0.102959000 |
| 17 | 8.815921000  | 18.138976000 | -2.751852000 |

|                                       |              |              |              |
|---------------------------------------|--------------|--------------|--------------|
| 1                                     | 13.701907000 | 14.031389000 | 2.292148000  |
| <sup>5</sup> P <sub>Cl,1Cl,NE</sub> : |              |              |              |
| 26                                    | 7.706271000  | 13.471028000 | 4.221017000  |
| 17                                    | 11.852906000 | 16.512154000 | 3.678807000  |
| 8                                     | 7.592445000  | 12.146367000 | 2.790815000  |
| 1                                     | 7.874430000  | 11.229548000 | 2.975711000  |
| 6                                     | 4.646657000  | 12.978404000 | 4.153507000  |
| 6                                     | 3.291263000  | 13.244043000 | 4.343004000  |
| 1                                     | 2.544271000  | 12.653328000 | 3.826631000  |
| 6                                     | 2.925432000  | 14.289501000 | 5.200944000  |
| 1                                     | 1.880317000  | 14.528549000 | 5.363212000  |
| 6                                     | 3.924952000  | 15.027498000 | 5.842367000  |
| 1                                     | 3.671450000  | 15.845816000 | 6.507020000  |
| 6                                     | 5.269017000  | 14.702330000 | 5.619810000  |
| 6                                     | 6.391985000  | 15.397714000 | 6.359282000  |
| 1                                     | 6.071210000  | 16.408458000 | 6.653386000  |
| 1                                     | 6.572934000  | 14.841259000 | 7.283867000  |
| 6                                     | 7.766242000  | 16.622962000 | 4.698864000  |
| 1                                     | 8.827645000  | 16.866886000 | 4.574264000  |
| 1                                     | 7.287378000  | 17.507915000 | 5.143545000  |
| 6                                     | 7.198416000  | 16.375694000 | 3.317359000  |
| 6                                     | 6.659674000  | 17.410414000 | 2.543538000  |
| 1                                     | 6.570102000  | 18.406589000 | 2.962354000  |
| 6                                     | 6.245230000  | 17.142576000 | 1.234954000  |
| 1                                     | 5.826724000  | 17.932717000 | 0.621461000  |
| 6                                     | 6.372788000  | 15.841617000 | 0.731758000  |
| 1                                     | 6.060247000  | 15.596876000 | -0.276357000 |
| 6                                     | 6.903313000  | 14.851181000 | 1.558131000  |
| 6                                     | 8.884888000  | 15.283013000 | 6.471368000  |
| 1                                     | 8.810840000  | 15.897144000 | 7.379887000  |
| 1                                     | 9.733363000  | 15.653267000 | 5.893089000  |
| 6                                     | 9.203991000  | 13.778830000 | 6.797751000  |
| 6                                     | 8.386640000  | 13.210810000 | 7.991852000  |
| 6                                     | 7.911767000  | 11.890111000 | 7.913806000  |
| 1                                     | 8.100520000  | 11.336101000 | 7.002754000  |
| 6                                     | 7.212046000  | 11.308459000 | 8.977360000  |
| 1                                     | 6.858025000  | 10.285132000 | 8.892450000  |
| 6                                     | 6.967823000  | 12.039946000 | 10.146548000 |
| 1                                     | 6.422646000  | 11.592405000 | 10.971691000 |
| 6                                     | 7.434872000  | 13.356358000 | 10.239583000 |
| 1                                     | 7.251692000  | 13.937197000 | 11.138666000 |
| 6                                     | 8.139825000  | 13.933966000 | 9.174977000  |
| 1                                     | 8.487129000  | 14.956456000 | 9.280853000  |
| 6                                     | 10.714357000 | 13.693566000 | 7.161316000  |
| 6                                     | 11.291232000 | 14.488422000 | 8.169392000  |
| 1                                     | 10.681225000 | 15.180176000 | 8.740225000  |
| 6                                     | 12.658592000 | 14.399845000 | 8.458254000  |
| 1                                     | 13.084648000 | 15.024943000 | 9.237430000  |
| 6                                     | 13.473839000 | 13.509036000 | 7.748275000  |
| 1                                     | 14.533192000 | 13.437423000 | 7.974960000  |
| 6                                     | 12.907838000 | 12.711300000 | 6.745967000  |
| 1                                     | 13.528847000 | 12.014269000 | 6.190589000  |
| 6                                     | 11.541051000 | 12.806579000 | 6.454317000  |
| 1                                     | 11.090683000 | 12.204526000 | 5.675426000  |
| 7                                     | 5.612467000  | 13.692302000 | 4.782769000  |
| 7                                     | 7.676325000  | 15.448625000 | 5.608329000  |
| 7                                     | 7.309443000  | 15.117402000 | 2.825354000  |
| 8                                     | 8.950613000  | 13.018446000 | 5.629247000  |
| 1                                     | 5.006002000  | 12.204011000 | 3.486479000  |
| 1                                     | 7.010669000  | 13.817195000 | 1.254219000  |
| 6                                     | 12.781193000 | 15.829749000 | 1.955499000  |
| 6                                     | 14.256700000 | 16.057789000 | 2.234791000  |
| 6                                     | 12.194520000 | 16.711260000 | 0.866170000  |
| 6                                     | 12.385041000 | 14.365771000 | 1.862467000  |
| 6                                     | 14.846745000 | 15.534730000 | 3.404290000  |
| 6                                     | 16.210651000 | 15.687847000 | 3.653497000  |
| 6                                     | 16.990551000 | 16.363729000 | 2.714954000  |
| 6                                     | 16.450626000 | 16.881803000 | 1.544619000  |
| 6                                     | 15.077588000 | 16.725859000 | 1.310155000  |
| 1                                     | 14.661785000 | 17.119983000 | 0.392313000  |
| 1                                     | 17.073825000 | 17.396057000 | 0.823988000  |
| 17                                    | 18.780782000 | 16.569942000 | 3.036483000  |
| 1                                     | 16.652626000 | 15.291289000 | 4.558792000  |
| 1                                     | 14.233763000 | 15.017413000 | 4.132516000  |

|    |              |              |              |
|----|--------------|--------------|--------------|
| 6  | 13.344324000 | 13.387189000 | 1.544184000  |
| 6  | 11.041637000 | 13.966505000 | 2.008507000  |
| 6  | 10.657237000 | 12.631157000 | 1.860250000  |
| 6  | 11.641505000 | 11.695873000 | 1.547204000  |
| 6  | 12.976705000 | 12.044942000 | 1.381377000  |
| 1  | 13.722226000 | 11.299645000 | 1.134047000  |
| 17 | 11.159203000 | 9.935832000  | 1.352199000  |
| 1  | 9.614667000  | 12.350140000 | 2.011419000  |
| 1  | 10.284694000 | 14.697210000 | 2.266511000  |
| 6  | 11.658118000 | 16.151080000 | -0.305945000 |
| 6  | 12.228593000 | 18.116131000 | 0.985438000  |
| 6  | 11.733785000 | 18.938593000 | -0.026969000 |
| 6  | 11.205419000 | 18.343915000 | -1.172775000 |
| 6  | 11.161289000 | 16.964695000 | -1.333366000 |
| 1  | 10.752492000 | 16.521708000 | -2.232727000 |
| 1  | 11.630943000 | 15.077429000 | -0.436299000 |
| 1  | 12.628216000 | 18.569916000 | 1.884081000  |
| 1  | 11.756896000 | 20.015927000 | 0.078197000  |
| 17 | 10.550298000 | 19.416799000 | -2.503640000 |
| 1  | 14.382554000 | 13.660309000 | 1.407618000  |

Data for 1Br:

<sup>5</sup>Re<sub>1Br</sub>:

|    |              |              |              |
|----|--------------|--------------|--------------|
| 26 | 6.143256000  | 12.473297000 | 3.458852000  |
| 8  | 4.827007000  | 11.083811000 | 3.210732000  |
| 1  | 5.139164000  | 10.238326000 | 2.837116000  |
| 6  | 3.732212000  | 8.852996000  | 6.299167000  |
| 1  | 4.650622000  | 9.339046000  | 5.950775000  |
| 1  | 3.223876000  | 8.419657000  | 5.428195000  |
| 1  | 4.016275000  | 8.031585000  | 6.967759000  |
| 6  | 1.531106000  | 9.128608000  | 7.506412000  |
| 1  | 1.782653000  | 8.315639000  | 8.197504000  |
| 1  | 0.987416000  | 8.694156000  | 6.658025000  |
| 1  | 0.854549000  | 9.817476000  | 8.028005000  |
| 6  | 3.552733000  | 10.442352000 | 8.255451000  |
| 1  | 4.439056000  | 11.005337000 | 7.944774000  |
| 1  | 3.879086000  | 9.638772000  | 8.927019000  |
| 1  | 2.902294000  | 11.114716000 | 8.828735000  |
| 6  | 2.812776000  | 9.854499000  | 7.034962000  |
| 6  | 2.371500000  | 10.984652000 | 6.054510000  |
| 1  | 1.797460000  | 10.519973000 | 5.243275000  |
| 1  | 1.684725000  | 11.664496000 | 6.569165000  |
| 6  | 3.905541000  | 12.972349000 | 5.794091000  |
| 6  | 3.357674000  | 13.710265000 | 6.879059000  |
| 1  | 2.537749000  | 13.300964000 | 7.451025000  |
| 6  | 3.897720000  | 14.939193000 | 7.214405000  |
| 1  | 3.485424000  | 15.499897000 | 8.046532000  |
| 6  | 4.988445000  | 15.448029000 | 6.493304000  |
| 1  | 5.447787000  | 16.392308000 | 6.758437000  |
| 6  | 5.479778000  | 14.704118000 | 5.424668000  |
| 6  | 6.613052000  | 15.283270000 | 4.604658000  |
| 1  | 6.189921000  | 16.054270000 | 3.951199000  |
| 1  | 7.316107000  | 15.791322000 | 5.274063000  |
| 6  | 7.540916000  | 14.893906000 | 2.366452000  |
| 1  | 8.216746000  | 14.230666000 | 1.818600000  |
| 1  | 7.995147000  | 15.891530000 | 2.410128000  |
| 6  | 6.221011000  | 14.935279000 | 1.641284000  |
| 6  | 5.936227000  | 15.933014000 | 0.717993000  |
| 1  | 6.632479000  | 16.747264000 | 0.560507000  |
| 6  | 4.733721000  | 15.842435000 | -0.004430000 |
| 1  | 4.482205000  | 16.598216000 | -0.740725000 |
| 6  | 3.870692000  | 14.784013000 | 0.215985000  |
| 1  | 2.955602000  | 14.699366000 | -0.351867000 |
| 6  | 4.194696000  | 13.798478000 | 1.193551000  |
| 6  | 2.153137000  | 12.495495000 | 0.682365000  |
| 1  | 2.404317000  | 12.238082000 | -0.359333000 |
| 1  | 1.562034000  | 13.420348000 | 0.651761000  |
| 6  | 1.247431000  | 11.380464000 | 1.264418000  |
| 6  | 0.032585000  | 11.246690000 | 0.313864000  |
| 1  | -0.657960000 | 10.481660000 | 0.686726000  |
| 1  | 0.348929000  | 10.954355000 | -0.695000000 |
| 1  | -0.518595000 | 12.192382000 | 0.239047000  |
| 6  | 0.751125000  | 11.781190000 | 2.671676000  |
| 1  | 1.588223000  | 11.946123000 | 3.357071000  |
| 1  | 0.112749000  | 10.994350000 | 3.091079000  |
| 1  | 0.162403000  | 12.706085000 | 2.626869000  |
| 6  | 1.991336000  | 10.025189000 | 1.319741000  |
| 1  | 2.824261000  | 10.044385000 | 2.029655000  |
| 1  | 2.385575000  | 9.755391000  | 0.331929000  |
| 1  | 1.302360000  | 9.232600000  | 1.635547000  |
| 6  | 8.654804000  | 13.821738000 | 4.300743000  |
| 1  | 9.224127000  | 14.652049000 | 4.732753000  |
| 1  | 9.223312000  | 13.422514000 | 3.459810000  |
| 6  | 8.441670000  | 12.640545000 | 5.298113000  |
| 6  | 8.117427000  | 13.072795000 | 6.747493000  |
| 6  | 7.267717000  | 12.266963000 | 7.524359000  |
| 1  | 6.805004000  | 11.404142000 | 7.061600000  |
| 6  | 7.017195000  | 12.573394000 | 8.866032000  |
| 1  | 6.357755000  | 11.937153000 | 9.448231000  |
| 6  | 7.612537000  | 13.694642000 | 9.458436000  |
| 1  | 7.417713000  | 13.933886000 | 10.498989000 |
| 6  | 8.465409000  | 14.500399000 | 8.696449000  |
| 1  | 8.937777000  | 15.369950000 | 9.142960000  |
| 6  | 8.719574000  | 14.189217000 | 7.354049000  |
| 1  | 9.397872000  | 14.826417000 | 6.796960000  |
| 6  | 9.724213000  | 11.773872000 | 5.336448000  |



|    |              |              |              |
|----|--------------|--------------|--------------|
| 6  | 10.990504000 | 12.354771000 | 5.529491000  |
| 1  | 11.091118000 | 13.428443000 | 5.651379000  |
| 6  | 12.140775000 | 11.558351000 | 5.575313000  |
| 1  | 13.110556000 | 12.024170000 | 5.720922000  |
| 6  | 12.042101000 | 10.168102000 | 5.436715000  |
| 1  | 12.933830000 | 9.550451000  | 5.474229000  |
| 6  | 10.783991000 | 9.583231000  | 5.249943000  |
| 1  | 10.695534000 | 8.506533000  | 5.141131000  |
| 6  | 9.633808000  | 10.380463000 | 5.198393000  |
| 1  | 8.659015000  | 9.935645000  | 5.043813000  |
| 7  | 3.458865000  | 11.741308000 | 5.431281000  |
| 1  | 3.917094000  | 11.319591000 | 4.607209000  |
| 7  | 4.943808000  | 13.510067000 | 5.054379000  |
| 7  | 7.359180000  | 14.317725000 | 3.734631000  |
| 7  | 5.371144000  | 13.901223000 | 1.902142000  |
| 7  | 3.382056000  | 12.740071000 | 1.448132000  |
| 1  | 3.752187000  | 12.019113000 | 2.081912000  |
| 8  | 7.357672000  | 11.860141000 | 4.768230000  |
| 6  | 12.248738000 | 12.733616000 | -1.971032000 |
| 6  | 13.676191000 | 12.650478000 | -2.299992000 |
| 6  | 14.409387000 | 13.796093000 | -2.705437000 |
| 6  | 15.766462000 | 13.720812000 | -3.022104000 |
| 6  | 16.409423000 | 12.487514000 | -2.929302000 |
| 6  | 15.736326000 | 11.332597000 | -2.534152000 |
| 6  | 14.377977000 | 11.418943000 | -2.226094000 |
| 1  | 16.258360000 | 10.386717000 | -2.457564000 |
| 17 | 18.192873000 | 12.381130000 | -3.339625000 |
| 1  | 16.306064000 | 14.603257000 | -3.343427000 |
| 1  | 13.903730000 | 14.750118000 | -2.796130000 |
| 1  | 13.857622000 | 10.526030000 | -1.900568000 |
| 6  | 11.714345000 | 13.937217000 | -1.328601000 |
| 6  | 12.498890000 | 14.702085000 | -0.425199000 |
| 1  | 13.504599000 | 14.378944000 | -0.184361000 |
| 6  | 11.996491000 | 15.849790000 | 0.189139000  |
| 1  | 12.606427000 | 16.412410000 | 0.885179000  |
| 6  | 10.692766000 | 16.248915000 | -0.100243000 |
| 17 | 10.026410000 | 17.759085000 | 0.701604000  |
| 6  | 9.879775000  | 15.534958000 | -0.979260000 |
| 1  | 8.872139000  | 15.867099000 | -1.196942000 |
| 6  | 10.391954000 | 14.386579000 | -1.584562000 |
| 1  | 9.767863000  | 13.842576000 | -2.283246000 |
| 6  | 11.360192000 | 11.610693000 | -2.288027000 |
| 6  | 11.574932000 | 10.806887000 | -3.438626000 |
| 6  | 10.733467000 | 9.738357000  | -3.750125000 |
| 1  | 10.904280000 | 9.144875000  | -4.639944000 |
| 1  | 12.395949000 | 11.038006000 | -4.106956000 |
| 6  | 10.254918000 | 11.283755000 | -1.460466000 |
| 1  | 10.058993000 | 11.851970000 | -0.558822000 |
| 6  | 9.409747000  | 10.213987000 | -1.758714000 |
| 1  | 8.582122000  | 9.984766000  | -1.098681000 |
| 6  | 9.662887000  | 9.458697000  | -2.901565000 |
| 17 | 8.555402000  | 8.053419000  | -3.304942000 |
| 35 | 7.615287000  | 11.462106000 | 1.408500000  |

<sup>3</sup>Re<sub>1Br</sub>:

|    |             |              |             |
|----|-------------|--------------|-------------|
| 26 | 5.957655000 | 12.631756000 | 3.225068000 |
| 8  | 4.707480000 | 11.248991000 | 3.122486000 |
| 1  | 5.093174000 | 10.484438000 | 2.646234000 |
| 6  | 3.733115000 | 9.000727000  | 6.224991000 |
| 1  | 4.618585000 | 9.454150000  | 5.765386000 |
| 1  | 3.083444000 | 8.631347000  | 5.420982000 |
| 1  | 4.063012000 | 8.137470000  | 6.815306000 |
| 6  | 1.738986000 | 9.333550000  | 7.738315000 |
| 1  | 2.034897000 | 8.476607000  | 8.354616000 |
| 1  | 1.059282000 | 8.969579000  | 6.957573000 |
| 1  | 1.182344000 | 10.031603000 | 8.376442000 |
| 6  | 3.916475000 | 10.504053000 | 8.248992000 |
| 1  | 4.781508000 | 11.035912000 | 7.840038000 |
| 1  | 4.286501000 | 9.654770000  | 8.836298000 |
| 1  | 3.389097000 | 11.181570000 | 8.932056000 |
| 6  | 2.984235000 | 10.012852000 | 7.121494000 |
| 6  | 2.478995000 | 11.210823000 | 6.259835000 |
| 1  | 1.760637000 | 10.819003000 | 5.529628000 |
| 1  | 1.925785000 | 11.907739000 | 6.897478000 |
| 6  | 4.061330000 | 13.134892000 | 5.843196000 |

|   |              |              |              |
|---|--------------|--------------|--------------|
| 6 | 3.716975000  | 13.877535000 | 7.005066000  |
| 1 | 2.960380000  | 13.510453000 | 7.683764000  |
| 6 | 4.383973000  | 15.061401000 | 7.278174000  |
| 1 | 4.130159000  | 15.625793000 | 8.169237000  |
| 6 | 5.399748000  | 15.520066000 | 6.423288000  |
| 1 | 5.955745000  | 16.423421000 | 6.641432000  |
| 6 | 5.678663000  | 14.768903000 | 5.285361000  |
| 6 | 6.715169000  | 15.249593000 | 4.295952000  |
| 1 | 6.261883000  | 16.032522000 | 3.679232000  |
| 1 | 7.557685000  | 15.705387000 | 4.824397000  |
| 6 | 7.317817000  | 14.769259000 | 1.953704000  |
| 1 | 7.865487000  | 14.050279000 | 1.336917000  |
| 1 | 7.853696000  | 15.723875000 | 1.958524000  |
| 6 | 5.929462000  | 14.898262000 | 1.403240000  |
| 6 | 5.575509000  | 15.889036000 | 0.503208000  |
| 1 | 6.283956000  | 16.662514000 | 0.235517000  |
| 6 | 4.285708000  | 15.839808000 | -0.059235000 |
| 1 | 3.974222000  | 16.594885000 | -0.772577000 |
| 6 | 3.417801000  | 14.822031000 | 0.285810000  |
| 1 | 2.436718000  | 14.765894000 | -0.162563000 |
| 6 | 3.817601000  | 13.830997000 | 1.230678000  |
| 6 | 1.712705000  | 12.563876000 | 0.938275000  |
| 1 | 1.864071000  | 12.306382000 | -0.122149000 |
| 1 | 1.123582000  | 13.489744000 | 0.965833000  |
| 6 | 0.868930000  | 11.449072000 | 1.607031000  |
| 6 | -0.420946000 | 11.294081000 | 0.765522000  |
| 1 | -1.074637000 | 10.535389000 | 1.210672000  |
| 1 | -0.189655000 | 10.982058000 | -0.260231000 |
| 1 | -0.980012000 | 12.236870000 | 0.718836000  |
| 6 | 0.492978000  | 11.865350000 | 3.046372000  |
| 1 | 1.385709000  | 12.054833000 | 3.650524000  |
| 1 | -0.092507000 | 11.076435000 | 3.533419000  |
| 1 | -0.111522000 | 12.781044000 | 3.041157000  |
| 6 | 1.628201000  | 10.101059000 | 1.614984000  |
| 1 | 2.518771000  | 10.132379000 | 2.251537000  |
| 1 | 1.940768000  | 9.822479000  | 0.600899000  |
| 1 | 0.976220000  | 9.306539000  | 1.997076000  |
| 6 | 8.576693000  | 13.592054000 | 3.736572000  |
| 1 | 9.252867000  | 14.382704000 | 4.073622000  |
| 1 | 8.982426000  | 13.152024000 | 2.825411000  |
| 6 | 8.379030000  | 12.439651000 | 4.749930000  |
| 6 | 8.285798000  | 12.879937000 | 6.227566000  |
| 6 | 7.503568000  | 12.119638000 | 7.113559000  |
| 1 | 6.924777000  | 11.294300000 | 6.717573000  |
| 6 | 7.465069000  | 12.424558000 | 8.477893000  |
| 1 | 6.855373000  | 11.823814000 | 9.145581000  |
| 6 | 8.208117000  | 13.499279000 | 8.984054000  |
| 1 | 8.177340000  | 13.737108000 | 10.042516000 |
| 6 | 8.994192000  | 14.259717000 | 8.112273000  |
| 1 | 9.578407000  | 15.093051000 | 8.490093000  |
| 6 | 9.037213000  | 13.948777000 | 6.746446000  |
| 1 | 9.672288000  | 14.547628000 | 6.102357000  |
| 6 | 9.555521000  | 11.441791000 | 4.627558000  |
| 6 | 10.887691000 | 11.886110000 | 4.708565000  |
| 1 | 11.108001000 | 12.938275000 | 4.858162000  |
| 6 | 11.948445000 | 10.978624000 | 4.609260000  |
| 1 | 12.970789000 | 11.339053000 | 4.668145000  |
| 6 | 11.692967000 | 9.612034000  | 4.438570000  |
| 1 | 12.515375000 | 8.907618000  | 4.364561000  |
| 6 | 10.369072000 | 9.163171000  | 4.365411000  |
| 1 | 10.159825000 | 8.106030000  | 4.233391000  |
| 6 | 9.307250000  | 10.072010000 | 4.456436000  |
| 1 | 8.281706000  | 9.733197000  | 4.388390000  |
| 7 | 3.510240000  | 11.934505000 | 5.513575000  |
| 1 | 3.876507000  | 11.500551000 | 4.655903000  |
| 7 | 5.010499000  | 13.630571000 | 4.978154000  |
| 7 | 7.243324000  | 14.192510000 | 3.346838000  |
| 7 | 5.072736000  | 13.903569000 | 1.796760000  |
| 7 | 3.011458000  | 12.801585000 | 1.582244000  |
| 1 | 3.446248000  | 12.078353000 | 2.171445000  |
| 8 | 7.153151000  | 11.776473000 | 4.345090000  |
| 6 | 12.380487000 | 12.830534000 | -1.542278000 |
| 6 | 13.847518000 | 12.857717000 | -1.539399000 |
| 6 | 14.565321000 | 14.019646000 | -1.925549000 |
| 6 | 15.960483000 | 14.049955000 | -1.926600000 |

|    |             |             |             |
|----|-------------|-------------|-------------|
| 6  | 16.65648000 | 12.90857000 | -1.53175300 |
| 6  | 16.00000500 | 11.74238100 | -1.14171000 |
| 6  | 14.60461300 | 11.72189900 | -1.15071300 |
| 1  | 16.56067800 | 10.87039600 | -0.82801400 |
| 17 | 18.48927100 | 12.94263200 | -1.52557400 |
| 1  | 16.49100900 | 14.94138600 | -2.23802500 |
| 1  | 14.02305700 | 14.89950700 | -2.25110800 |
| 1  | 14.09220000 | 10.82274500 | -0.82980400 |
| 6  | 11.62677300 | 14.03856800 | -1.19510300 |
| 6  | 12.12486900 | 14.97216300 | -0.24799500 |
| 1  | 13.06969500 | 14.77996800 | 0.24613600  |
| 6  | 11.41200900 | 16.12357000 | 0.08878500  |
| 1  | 11.80266600 | 16.81724300 | 0.82317700  |
| 6  | 10.18425600 | 16.35574100 | -0.52874500 |
| 17 | 9.24196600  | 17.86952200 | -0.09122400 |
| 6  | 9.64984400  | 15.47361900 | -1.46643000 |
| 1  | 8.69885600  | 15.67927700 | -1.94219500 |
| 6  | 10.36995400 | 14.32306200 | -1.79140400 |
| 1  | 9.96454800  | 13.64627100 | -2.53377300 |
| 6  | 11.67219000 | 11.59507900 | -1.89176100 |
| 6  | 12.20192600 | 10.68733100 | -2.84683200 |
| 6  | 11.53067400 | 9.51215200  | -3.18684800 |
| 1  | 11.94277000 | 8.83831400  | -3.92800400 |
| 1  | 13.13662400 | 10.91823300 | -3.34407900 |
| 6  | 10.43126700 | 11.25900300 | -1.29134300 |
| 1  | 9.99029400  | 11.90445000 | -0.54095500 |
| 6  | 9.75327400  | 10.08407900 | -1.61882700 |
| 1  | 8.81370800  | 9.85890000  | -1.12830400 |
| 6  | 10.31518500 | 9.22953900  | -2.56432900 |
| 17 | 9.43160400  | 7.68386800  | -3.00677800 |
| 35 | 7.15906500  | 11.36896400 | 0.85730700  |

<sup>5</sup>TS<sub>OH,1Br</sub>:

|    |            |             |             |
|----|------------|-------------|-------------|
| 26 | 7.05518100 | 11.93234700 | 3.19710400  |
| 8  | 6.30359600 | 10.04082000 | 2.66475300  |
| 1  | 6.52571600 | 9.53513100  | 3.47661300  |
| 6  | 4.36204800 | 8.24394000  | 6.33472700  |
| 1  | 5.18962100 | 8.95291000  | 6.22019100  |
| 1  | 4.46117500 | 7.47371200  | 5.56105600  |
| 1  | 4.46736000 | 7.75679200  | 7.31162600  |
| 6  | 1.85403500 | 7.93640800  | 6.39005300  |
| 1  | 1.91191700 | 7.44193200  | 7.36673500  |
| 1  | 1.90915000 | 7.16035000  | 5.61670500  |
| 1  | 0.87304900 | 8.42272800  | 6.31602900  |
| 6  | 2.89333000 | 10.01525000 | 7.36503800  |
| 1  | 3.69044400 | 10.76262900 | 7.29528000  |
| 1  | 2.97894000 | 9.52500100  | 8.34292600  |
| 1  | 1.92913500 | 10.53717600 | 7.33548400  |
| 6  | 2.99979100 | 8.96515200  | 6.23690400  |
| 6  | 2.83876300 | 9.62231400  | 4.82752100  |
| 1  | 2.84097100 | 8.82150600  | 4.08193200  |
| 1  | 1.85317400 | 10.09802300 | 4.76676600  |
| 6  | 3.90235700 | 11.91184100 | 4.71979600  |
| 6  | 2.75306700 | 12.62096200 | 5.15396800  |
| 1  | 1.80083400 | 12.11729600 | 5.24309300  |
| 6  | 2.86568300 | 13.96941700 | 5.45623900  |
| 1  | 1.99040000 | 14.52736200 | 5.77207900  |
| 6  | 4.11345700 | 14.60246200 | 5.36550000  |
| 1  | 4.23766300 | 15.64322400 | 5.63987000  |
| 6  | 5.20952000 | 13.85208400 | 4.93789800  |
| 6  | 6.59149200 | 14.45605100 | 5.04725400  |
| 1  | 6.52091800 | 15.54726200 | 4.94399000  |
| 1  | 6.93308300 | 14.26034800 | 6.06714800  |
| 6  | 7.77087600 | 14.80412300 | 2.92319200  |
| 1  | 8.67170600 | 14.48471400 | 2.39022100  |
| 1  | 7.88898500 | 15.85739000 | 3.21643700  |
| 6  | 6.60280800 | 14.66165300 | 1.97544700  |
| 6  | 6.16660300 | 15.74170400 | 1.21581400  |
| 1  | 6.61297500 | 16.71920100 | 1.35023100  |
| 6  | 5.14803400 | 15.52539800 | 0.27470100  |
| 1  | 4.79074700 | 16.34402000 | -0.34085500 |
| 6  | 4.58344800 | 14.26763900 | 0.13828800  |
| 1  | 3.78323000 | 14.10668900 | -0.56791500 |
| 6  | 5.04548800 | 13.20187900 | 0.95602600  |
| 6  | 3.59558400 | 11.46726400 | -0.14575000 |

|    |              |              |              |
|----|--------------|--------------|--------------|
| 1  | 3.919791000  | 10.460944000 | -0.433319000 |
| 1  | 3.713705000  | 12.093109000 | -1.036760000 |
| 6  | 2.083625000  | 11.392110000 | 0.233640000  |
| 6  | 1.316288000  | 10.967152000 | -1.040769000 |
| 1  | 0.247115000  | 10.856666000 | -0.825029000 |
| 1  | 1.684136000  | 10.006513000 | -1.423095000 |
| 1  | 1.424669000  | 11.714235000 | -1.837007000 |
| 6  | 1.548557000  | 12.752595000 | 0.730168000  |
| 1  | 2.106019000  | 13.101290000 | 1.606403000  |
| 1  | 0.493744000  | 12.659317000 | 1.016321000  |
| 1  | 1.612487000  | 13.520097000 | -0.050002000 |
| 6  | 1.878131000  | 10.330006000 | 1.334719000  |
| 1  | 2.460601000  | 10.577187000 | 2.227860000  |
| 1  | 2.185453000  | 9.336896000  | 0.981476000  |
| 1  | 0.821088000  | 10.269497000 | 1.620631000  |
| 6  | 8.921627000  | 13.600728000 | 4.781405000  |
| 1  | 9.221427000  | 14.401907000 | 5.470575000  |
| 1  | 9.666263000  | 13.542712000 | 3.988473000  |
| 6  | 8.885256000  | 12.198141000 | 5.494593000  |
| 6  | 8.186576000  | 12.256187000 | 6.871863000  |
| 6  | 7.275512000  | 11.251645000 | 7.231875000  |
| 1  | 7.057660000  | 10.479677000 | 6.505415000  |
| 6  | 6.662537000  | 11.249702000 | 8.491337000  |
| 1  | 5.962893000  | 10.459890000 | 8.747543000  |
| 6  | 6.947953000  | 12.259772000 | 9.417798000  |
| 1  | 6.470934000  | 12.262121000 | 10.392905000 |
| 6  | 7.861471000  | 13.265060000 | 9.076002000  |
| 1  | 8.099308000  | 14.050351000 | 9.787138000  |
| 6  | 8.478508000  | 13.258488000 | 7.818690000  |
| 1  | 9.201445000  | 14.034455000 | 7.586844000  |
| 6  | 10.353791000 | 11.703064000 | 5.655935000  |
| 6  | 10.943792000 | 11.414040000 | 6.898699000  |
| 1  | 10.380297000 | 11.549198000 | 7.813117000  |
| 6  | 12.264191000 | 10.948089000 | 6.983510000  |
| 1  | 12.692935000 | 10.733007000 | 7.957907000  |
| 6  | 13.023365000 | 10.761259000 | 5.825097000  |
| 1  | 14.046656000 | 10.404161000 | 5.889115000  |
| 6  | 12.444706000 | 11.036698000 | 4.578344000  |
| 1  | 13.018185000 | 10.886964000 | 3.668614000  |
| 6  | 11.126069000 | 11.494493000 | 4.494737000  |
| 1  | 10.686280000 | 11.677381000 | 3.519986000  |
| 7  | 3.880600000  | 10.571803000 | 4.433630000  |
| 1  | 4.678118000  | 10.226726000 | 3.905606000  |
| 7  | 5.107783000  | 12.548160000 | 4.570883000  |
| 7  | 7.621330000  | 13.924637000 | 4.113847000  |
| 7  | 6.062839000  | 13.414942000 | 1.849628000  |
| 7  | 4.521420000  | 11.938573000 | 0.892631000  |
| 1  | 4.946773000  | 11.236713000 | 1.493091000  |
| 8  | 8.186739000  | 11.294201000 | 4.619069000  |
| 6  | 6.904161000  | 8.194813000  | 1.437599000  |
| 6  | 8.361471000  | 8.160486000  | 1.698431000  |
| 6  | 9.271310000  | 8.015898000  | 0.624925000  |
| 6  | 10.641031000 | 7.867362000  | 0.849121000  |
| 6  | 11.108601000 | 7.876850000  | 2.159971000  |
| 6  | 10.252662000 | 8.034165000  | 3.249302000  |
| 6  | 8.884706000  | 8.167654000  | 3.012805000  |
| 1  | 10.640771000 | 8.062944000  | 4.258834000  |
| 17 | 12.898386000 | 7.668270000  | 2.460386000  |
| 1  | 11.322219000 | 7.738000000  | 0.017788000  |
| 1  | 8.906523000  | 7.982551000  | -0.392971000 |
| 1  | 8.230131000  | 8.309286000  | 3.863116000  |
| 6  | 6.458495000  | 8.631453000  | 0.095030000  |
| 6  | 6.994925000  | 9.800933000  | -0.491372000 |
| 1  | 7.668046000  | 10.431907000 | 0.079851000  |
| 6  | 6.658422000  | 10.171999000 | -1.793964000 |
| 1  | 7.069384000  | 11.075015000 | -2.228182000 |
| 6  | 5.787070000  | 9.362371000  | -2.521126000 |
| 17 | 5.352161000  | 9.838095000  | -4.232656000 |
| 6  | 5.239948000  | 8.198700000  | -1.986213000 |
| 1  | 4.578585000  | 7.574639000  | -2.573857000 |
| 6  | 5.575043000  | 7.840243000  | -0.677573000 |
| 1  | 5.176791000  | 6.916546000  | -0.278160000 |
| 6  | 6.041296000  | 7.249629000  | 2.179955000  |
| 6  | 6.575982000  | 6.098560000  | 2.804778000  |
| 6  | 5.746207000  | 5.147544000  | 3.404726000  |

|    |             |              |             |
|----|-------------|--------------|-------------|
| 1  | 6.16976000  | 4.264013000  | 3.865163000 |
| 1  | 7.642410000 | 5.917390000  | 2.789884000 |
| 6  | 4.635756000 | 7.417838000  | 2.193186000 |
| 1  | 4.204569000 | 8.303851000  | 1.747188000 |
| 6  | 3.797333000 | 6.471045000  | 2.779787000 |
| 1  | 2.723074000 | 6.605652000  | 2.771177000 |
| 6  | 4.368973000 | 5.346689000  | 3.377076000 |
| 17 | 3.275592000 | 4.099377000  | 4.140120000 |
| 35 | 9.184650000 | 12.143335000 | 1.241349000 |

<sup>5</sup>P<sub>OH,1Br</sub>:

|    |             |              |              |
|----|-------------|--------------|--------------|
| 26 | 7.440763000 | 12.422106000 | 3.834212000  |
| 8  | 5.620734000 | 7.647435000  | 1.046026000  |
| 1  | 6.286727000 | 8.263437000  | 1.432842000  |
| 6  | 4.978634000 | 7.826764000  | 4.881953000  |
| 1  | 5.773708000 | 8.514888000  | 5.190932000  |
| 1  | 5.202824000 | 7.482525000  | 3.865553000  |
| 1  | 5.004548000 | 6.958589000  | 5.551477000  |
| 6  | 2.501641000 | 7.501826000  | 4.515676000  |
| 1  | 2.486266000 | 6.644393000  | 5.198516000  |
| 1  | 2.684628000 | 7.122029000  | 3.502621000  |
| 1  | 1.506573000 | 7.964440000  | 4.532105000  |
| 6  | 3.312628000 | 8.999331000  | 6.377219000  |
| 1  | 4.045174000 | 9.748647000  | 6.695476000  |
| 1  | 3.366046000 | 8.158080000  | 7.079309000  |
| 1  | 2.310532000 | 9.438567000  | 6.459712000  |
| 6  | 3.594841000 | 8.510990000  | 4.940199000  |
| 6  | 3.546860000 | 9.690611000  | 3.920934000  |
| 1  | 3.693870000 | 9.273173000  | 2.917770000  |
| 1  | 2.550328000 | 10.144862000 | 3.930887000  |
| 6  | 4.395814000 | 11.944579000 | 4.708659000  |
| 6  | 3.193279000 | 12.322784000 | 5.358240000  |
| 1  | 2.350647000 | 11.647699000 | 5.382218000  |
| 6  | 3.123978000 | 13.553666000 | 5.991353000  |
| 1  | 2.211092000 | 13.845626000 | 6.499402000  |
| 6  | 4.234215000 | 14.410623000 | 5.991518000  |
| 1  | 4.205694000 | 15.366785000 | 6.499789000  |
| 6  | 5.385025000 | 14.006807000 | 5.318449000  |
| 6  | 6.560680000 | 14.968080000 | 5.247535000  |
| 1  | 6.301408000 | 15.751087000 | 4.524270000  |
| 1  | 6.667010000 | 15.467099000 | 6.218432000  |
| 6  | 8.520208000 | 15.174576000 | 3.756071000  |
| 1  | 9.513085000 | 14.741951000 | 3.593500000  |
| 1  | 8.661351000 | 16.221061000 | 4.060642000  |
| 6  | 7.747835000 | 15.117874000 | 2.461513000  |
| 6  | 7.590771000 | 16.257580000 | 1.685157000  |
| 1  | 7.981356000 | 17.208004000 | 2.026212000  |
| 6  | 6.912560000 | 16.142139000 | 0.458866000  |
| 1  | 6.767758000 | 17.014027000 | -0.169664000 |
| 6  | 6.422080000 | 14.914855000 | 0.056232000  |
| 1  | 5.888843000 | 14.821986000 | -0.878045000 |
| 6  | 6.608959000 | 13.773377000 | 0.886435000  |
| 6  | 5.553876000 | 12.158409000 | -0.748086000 |
| 1  | 5.995367000 | 11.197150000 | -1.039087000 |
| 1  | 5.836183000 | 12.878150000 | -1.523352000 |
| 6  | 4.004266000 | 11.993358000 | -0.727961000 |
| 6  | 3.576423000 | 11.511204000 | -2.133640000 |
| 1  | 2.489197000 | 11.378875000 | -2.177943000 |
| 1  | 4.043012000 | 10.549793000 | -2.382213000 |
| 1  | 3.860074000 | 12.237728000 | -2.905634000 |
| 6  | 3.308366000 | 13.334566000 | -0.407379000 |
| 1  | 3.627796000 | 13.724376000 | 0.565775000  |
| 1  | 2.220635000 | 13.198223000 | -0.373633000 |
| 1  | 3.525962000 | 14.091014000 | -1.171663000 |
| 6  | 3.606331000 | 10.940468000 | 0.329258000  |
| 1  | 3.872954000 | 11.280215000 | 1.335980000  |
| 1  | 4.109672000 | 9.981729000  | 0.150942000  |
| 1  | 2.523908000 | 10.765575000 | 0.305710000  |
| 6  | 8.816976000 | 14.064062000 | 5.942883000  |
| 1  | 8.736840000 | 14.814886000 | 6.737876000  |
| 1  | 9.821395000 | 14.146269000 | 5.523418000  |
| 6  | 8.691645000 | 12.595322000 | 6.474068000  |
| 6  | 7.604619000 | 12.397194000 | 7.557655000  |
| 6  | 7.016017000 | 11.125511000 | 7.684146000  |
| 1  | 7.296793000 | 10.356136000 | 6.975082000  |

|    |              |              |              |
|----|--------------|--------------|--------------|
| 6  | 6.087385000  | 10.856955000 | 8.694487000  |
| 1  | 5.652697000  | 9.865259000  | 8.775429000  |
| 6  | 5.718750000  | 11.860374000 | 9.601700000  |
| 1  | 4.996976000  | 11.653779000 | 10.385667000 |
| 6  | 6.294196000  | 13.129351000 | 9.487157000  |
| 1  | 6.020039000  | 13.917512000 | 10.181994000 |
| 6  | 7.231240000  | 13.393237000 | 8.477098000  |
| 1  | 7.664160000  | 14.386466000 | 8.426292000  |
| 6  | 10.069140000 | 12.220152000 | 7.088512000  |
| 6  | 10.557231000 | 12.845825000 | 8.250071000  |
| 1  | 9.950262000  | 13.579225000 | 8.770901000  |
| 6  | 11.819289000 | 12.519934000 | 8.761277000  |
| 1  | 12.179508000 | 13.013619000 | 9.658951000  |
| 6  | 12.611972000 | 11.557154000 | 8.122949000  |
| 1  | 13.588570000 | 11.300849000 | 8.521950000  |
| 6  | 12.130950000 | 10.926395000 | 6.969165000  |
| 1  | 12.735109000 | 10.175353000 | 6.468467000  |
| 6  | 10.870992000 | 11.258388000 | 6.454903000  |
| 1  | 10.485159000 | 10.779932000 | 5.563459000  |
| 7  | 4.559920000  | 10.737364000 | 4.094389000  |
| 1  | 5.464259000  | 10.562656000 | 3.666536000  |
| 7  | 5.466083000  | 12.810715000 | 4.673205000  |
| 7  | 7.862038000  | 14.373418000 | 4.830657000  |
| 7  | 7.262007000  | 13.892233000 | 2.093859000  |
| 7  | 6.171104000  | 12.534602000 | 0.528619000  |
| 1  | 6.457243000  | 11.762907000 | 1.124924000  |
| 8  | 8.429237000  | 11.762964000 | 5.346527000  |
| 6  | 6.271331000  | 6.463246000  | 0.455496000  |
| 6  | 7.319116000  | 6.932798000  | -0.575033000 |
| 6  | 8.548290000  | 6.281067000  | -0.756704000 |
| 6  | 9.454267000  | 6.711175000  | -1.736909000 |
| 6  | 9.110599000  | 7.800100000  | -2.529426000 |
| 6  | 7.897018000  | 8.469127000  | -2.382916000 |
| 6  | 7.004706000  | 8.024828000  | -1.403523000 |
| 1  | 7.649094000  | 9.312764000  | -3.015127000 |
| 17 | 10.289890000 | 8.375140000  | -3.812562000 |
| 1  | 10.402189000 | 6.204572000  | -1.869011000 |
| 1  | 8.816425000  | 5.435066000  | -0.135734000 |
| 1  | 6.054519000  | 8.529706000  | -1.278127000 |
| 6  | 5.138670000  | 5.707299000  | -0.260819000 |
| 6  | 3.799308000  | 5.935443000  | 0.091021000  |
| 1  | 3.569038000  | 6.667075000  | 0.853177000  |
| 6  | 2.761189000  | 5.238978000  | -0.540750000 |
| 1  | 1.729294000  | 5.423066000  | -0.268043000 |
| 6  | 3.083102000  | 4.308930000  | -1.523872000 |
| 17 | 1.729188000  | 3.390834000  | -2.358687000 |
| 6  | 4.399339000  | 4.053947000  | -1.898109000 |
| 1  | 4.627458000  | 3.328550000  | -2.669064000 |
| 6  | 5.424383000  | 4.762835000  | -1.261140000 |
| 1  | 6.450089000  | 4.575743000  | -1.557892000 |
| 6  | 6.900527000  | 5.636671000  | 1.597887000  |
| 6  | 7.884101000  | 6.236262000  | 2.409585000  |
| 6  | 8.458013000  | 5.547303000  | 3.481420000  |
| 1  | 9.211985000  | 6.019420000  | 4.099018000  |
| 1  | 8.206384000  | 7.254799000  | 2.220627000  |
| 6  | 6.502903000  | 4.323957000  | 1.892260000  |
| 1  | 5.747667000  | 3.833331000  | 1.292196000  |
| 6  | 7.070106000  | 3.616772000  | 2.962173000  |
| 1  | 6.755612000  | 2.603299000  | 3.178129000  |
| 6  | 8.038443000  | 4.243403000  | 3.736469000  |
| 17 | 8.788580000  | 3.327495000  | 5.138579000  |
| 35 | 7.659743000  | 10.113043000 | 2.422214000  |

<sup>5</sup>TS<sub>Br,1Br</sub>:

|    |             |              |             |
|----|-------------|--------------|-------------|
| 26 | 6.484407000 | 13.205792000 | 3.413240000 |
| 8  | 5.785447000 | 11.396864000 | 2.982305000 |
| 1  | 6.404319000 | 10.683046000 | 2.743872000 |
| 6  | 5.347606000 | 8.765631000  | 5.733200000 |
| 1  | 6.048338000 | 9.522717000  | 5.363566000 |
| 1  | 4.912870000 | 8.252718000  | 4.865543000 |
| 1  | 5.916540000 | 8.027635000  | 6.311626000 |
| 6  | 3.240615000 | 8.316500000  | 7.052637000 |
| 1  | 3.749081000 | 7.540495000  | 7.637003000 |
| 1  | 2.769080000 | 7.832915000  | 6.187777000 |
| 1  | 2.446600000 | 8.743859000  | 7.678396000 |

|   |              |              |              |
|---|--------------|--------------|--------------|
| 6 | 4.878393000  | 10.065663000 | 7.848695000  |
| 1 | 5.569551000  | 10.865408000 | 7.560935000  |
| 1 | 5.441153000  | 9.323948000  | 8.428684000  |
| 1 | 4.111610000  | 10.494416000 | 8.505689000  |
| 6 | 4.243578000  | 9.405296000  | 6.605759000  |
| 6 | 3.451052000  | 10.454831000 | 5.765491000  |
| 1 | 3.007192000  | 9.932629000  | 4.907589000  |
| 1 | 2.616520000  | 10.838127000 | 6.361489000  |
| 6 | 4.273963000  | 12.834632000 | 5.734441000  |
| 6 | 3.555604000  | 13.252726000 | 6.887053000  |
| 1 | 2.941619000  | 12.551075000 | 7.433441000  |
| 6 | 3.669319000  | 14.564550000 | 7.320561000  |
| 1 | 3.128515000  | 14.886148000 | 8.204788000  |
| 6 | 4.489986000  | 15.468641000 | 6.630720000  |
| 1 | 4.606921000  | 16.492417000 | 6.965409000  |
| 6 | 5.165509000  | 15.014371000 | 5.498178000  |
| 6 | 6.000781000  | 15.999947000 | 4.702571000  |
| 1 | 5.307484000  | 16.641666000 | 4.144713000  |
| 1 | 6.533530000  | 16.655140000 | 5.402094000  |
| 6 | 6.799950000  | 16.027685000 | 2.377179000  |
| 1 | 7.635275000  | 15.681535000 | 1.760002000  |
| 1 | 6.840576000  | 17.125152000 | 2.426488000  |
| 6 | 5.516180000  | 15.580067000 | 1.719975000  |
| 6 | 4.738920000  | 16.460288000 | 0.973072000  |
| 1 | 5.006754000  | 17.507725000 | 0.907708000  |
| 6 | 3.604872000  | 15.950250000 | 0.316536000  |
| 1 | 2.966120000  | 16.611374000 | -0.260005000 |
| 6 | 3.297784000  | 14.602869000 | 0.405621000  |
| 1 | 2.423567000  | 14.205309000 | -0.091124000 |
| 6 | 4.136991000  | 13.741123000 | 1.170806000  |
| 6 | 2.885175000  | 11.708674000 | 0.498715000  |
| 1 | 2.866155000  | 12.098395000 | -0.529386000 |
| 1 | 1.892568000  | 11.909619000 | 0.933974000  |
| 6 | 3.087087000  | 10.171331000 | 0.417706000  |
| 6 | 1.951485000  | 9.610649000  | -0.471643000 |
| 1 | 2.040392000  | 8.521819000  | -0.561135000 |
| 1 | 1.990653000  | 10.037896000 | -1.481339000 |
| 1 | 0.966616000  | 9.835172000  | -0.043296000 |
| 6 | 2.996097000  | 9.526352000  | 1.820558000  |
| 1 | 3.808839000  | 9.866939000  | 2.469635000  |
| 1 | 3.062391000  | 8.434410000  | 1.738547000  |
| 1 | 2.039955000  | 9.771297000  | 2.300349000  |
| 6 | 4.453527000  | 9.840453000  | -0.227144000 |
| 1 | 5.282736000  | 10.212950000 | 0.383679000  |
| 1 | 4.534493000  | 10.289828000 | -1.224806000 |
| 1 | 4.570249000  | 8.755148000  | -0.333681000 |
| 6 | 8.389033000  | 15.402695000 | 4.173579000  |
| 1 | 8.653062000  | 16.359018000 | 4.644108000  |
| 1 | 8.993197000  | 15.295645000 | 3.270930000  |
| 6 | 8.732064000  | 14.168930000 | 5.077070000  |
| 6 | 8.355011000  | 14.355002000 | 6.570157000  |
| 6 | 7.907420000  | 13.235594000 | 7.293110000  |
| 1 | 7.783770000  | 12.300954000 | 6.760394000  |
| 6 | 7.617089000  | 13.326818000 | 8.658468000  |
| 1 | 7.273712000  | 12.447417000 | 9.195442000  |
| 6 | 7.765441000  | 14.546272000 | 9.332517000  |
| 1 | 7.537964000  | 14.620220000 | 10.391430000 |
| 6 | 8.211246000  | 15.668564000 | 8.625680000  |
| 1 | 8.331073000  | 16.620700000 | 9.134068000  |
| 6 | 8.507406000  | 15.572115000 | 7.258879000  |
| 1 | 8.857050000  | 16.460409000 | 6.743482000  |
| 6 | 10.266947000 | 13.938422000 | 4.997084000  |
| 6 | 11.191700000 | 14.950079000 | 5.315434000  |
| 1 | 10.848141000 | 15.924522000 | 5.646357000  |
| 6 | 12.569482000 | 14.717379000 | 5.222122000  |
| 1 | 13.266518000 | 15.512094000 | 5.470560000  |
| 6 | 13.048367000 | 13.464128000 | 4.817303000  |
| 1 | 14.116563000 | 13.280245000 | 4.755037000  |
| 6 | 12.134549000 | 12.449370000 | 4.503569000  |
| 1 | 12.492790000 | 11.472017000 | 4.193324000  |
| 6 | 10.756533000 | 12.687842000 | 4.589189000  |
| 1 | 10.037166000 | 11.918433000 | 4.339622000  |
| 7 | 4.242400000  | 11.566277000 | 5.240774000  |
| 1 | 4.814852000  | 11.383673000 | 4.395816000  |
| 7 | 5.055286000  | 13.740846000 | 5.046749000  |

|    |              |              |              |
|----|--------------|--------------|--------------|
| 7  | 6.963774000  | 15.411092000 | 3.726232000  |
| 7  | 5.216941000  | 14.259069000 | 1.849295000  |
| 7  | 3.930239000  | 12.401866000 | 1.254656000  |
| 1  | 4.590878000  | 11.870699000 | 1.854377000  |
| 8  | 8.048092000  | 13.044888000 | 4.535190000  |
| 6  | 10.232111000 | 11.976063000 | -0.847457000 |
| 6  | 10.358039000 | 10.650352000 | -0.197069000 |
| 6  | 11.615692000 | 10.152163000 | 0.210726000  |
| 6  | 11.741926000 | 8.879359000  | 0.777015000  |
| 6  | 10.599331000 | 8.103112000  | 0.938243000  |
| 6  | 9.336460000  | 8.553546000  | 0.547276000  |
| 6  | 9.224443000  | 9.820489000  | -0.019450000 |
| 1  | 8.459752000  | 7.934859000  | 0.691103000  |
| 17 | 10.751733000 | 6.441355000  | 1.683275000  |
| 1  | 12.713411000 | 8.506244000  | 1.075492000  |
| 1  | 12.509079000 | 10.744342000 | 0.061202000  |
| 1  | 8.245861000  | 10.195370000 | -0.291769000 |
| 6  | 11.312239000 | 12.968059000 | -0.634213000 |
| 6  | 11.830837000 | 13.210741000 | 0.660695000  |
| 1  | 11.375635000 | 12.729256000 | 1.517128000  |
| 6  | 12.881399000 | 14.102144000 | 0.864248000  |
| 1  | 13.254519000 | 14.287782000 | 1.863784000  |
| 6  | 13.427596000 | 14.757430000 | -0.241054000 |
| 17 | 14.806272000 | 15.929634000 | 0.018787000  |
| 6  | 12.955375000 | 14.546969000 | -1.532406000 |
| 1  | 13.401257000 | 15.056885000 | -2.376980000 |
| 6  | 11.896253000 | 13.653730000 | -1.723188000 |
| 1  | 11.547163000 | 13.470663000 | -2.731137000 |
| 6  | 9.435228000  | 12.068695000 | -2.094747000 |
| 6  | 9.227764000  | 10.934274000 | -2.911013000 |
| 6  | 8.529945000  | 11.028848000 | -4.119492000 |
| 1  | 8.388245000  | 10.153377000 | -4.740358000 |
| 1  | 9.637284000  | 9.975048000  | -2.622215000 |
| 6  | 8.915776000  | 13.309669000 | -2.535760000 |
| 1  | 9.030547000  | 14.184837000 | -1.908706000 |
| 6  | 8.214177000  | 13.415513000 | -3.734227000 |
| 1  | 7.808148000  | 14.367340000 | -4.052460000 |
| 6  | 8.032691000  | 12.267853000 | -4.508873000 |
| 17 | 7.111396000  | 12.400330000 | -6.081777000 |
| 35 | 8.420706000  | 13.034156000 | 0.848076000  |

<sup>5</sup>P<sub>Br,1Br</sub>:

|    |             |              |             |
|----|-------------|--------------|-------------|
| 26 | 6.578474000 | 12.892546000 | 3.292199000 |
| 8  | 5.737648000 | 11.082496000 | 3.012670000 |
| 1  | 6.299892000 | 10.290191000 | 2.933205000 |
| 6  | 5.144864000 | 8.811487000  | 5.988307000 |
| 1  | 5.915771000 | 9.470577000  | 5.573717000 |
| 1  | 4.655949000 | 8.293803000  | 5.153011000 |
| 1  | 5.639884000 | 8.056313000  | 6.610697000 |
| 6  | 3.023874000 | 8.649168000  | 7.347901000 |
| 1  | 3.467790000 | 7.872639000  | 7.982175000 |
| 1  | 2.502728000 | 8.151234000  | 6.520441000 |
| 1  | 2.277593000 | 9.187393000  | 7.945945000 |
| 6  | 4.824651000 | 10.290356000 | 8.012358000 |
| 1  | 5.573501000 | 11.011296000 | 7.666747000 |
| 1  | 5.334562000 | 9.542772000  | 8.632400000 |
| 1  | 4.106781000 | 10.821489000 | 8.649923000 |
| 6  | 4.116059000 | 9.609132000  | 6.821776000 |
| 6  | 3.414267000 | 10.670208000 | 5.918566000 |
| 1  | 2.892940000 | 10.134766000 | 5.113632000 |
| 1  | 2.642711000 | 11.185620000 | 6.500408000 |
| 6  | 4.465017000 | 12.944747000 | 5.666936000 |
| 6  | 3.837694000 | 13.529434000 | 6.800478000 |
| 1  | 3.198204000 | 12.936251000 | 7.438531000 |
| 6  | 4.078943000 | 14.862214000 | 7.096863000 |
| 1  | 3.609977000 | 15.311039000 | 7.966631000 |
| 6  | 4.933406000 | 15.626957000 | 6.287243000 |
| 1  | 5.141463000 | 16.666096000 | 6.512226000 |
| 6  | 5.516820000 | 15.012366000 | 5.180254000 |
| 6  | 6.366576000 | 15.840713000 | 4.230791000 |
| 1  | 5.677377000 | 16.401384000 | 3.586466000 |
| 1  | 6.925713000 | 16.586048000 | 4.811082000 |
| 6  | 7.183030000 | 15.527471000 | 1.926394000 |
| 1  | 8.003592000 | 15.055078000 | 1.376084000 |
| 1  | 7.303540000 | 16.616953000 | 1.834892000 |



|    |              |              |              |
|----|--------------|--------------|--------------|
| 6  | 5.885534000  | 15.096180000 | 1.283257000  |
| 6  | 5.189223000  | 15.946638000 | 0.430419000  |
| 1  | 5.528312000  | 16.963244000 | 0.273446000  |
| 6  | 4.044152000  | 15.447233000 | -0.216541000 |
| 1  | 3.470708000  | 16.087206000 | -0.879220000 |
| 6  | 3.644325000  | 14.138729000 | -0.008101000 |
| 1  | 2.762446000  | 13.749456000 | -0.497852000 |
| 6  | 4.395937000  | 13.306049000 | 0.873421000  |
| 6  | 2.999502000  | 11.320895000 | 0.382637000  |
| 1  | 3.068570000  | 11.551637000 | -0.690910000 |
| 1  | 2.018642000  | 11.690144000 | 0.724379000  |
| 6  | 3.026605000  | 9.776981000  | 0.539412000  |
| 6  | 1.873697000  | 9.212650000  | -0.325025000 |
| 1  | 1.838135000  | 8.119977000  | -0.245754000 |
| 1  | 2.007777000  | 9.471417000  | -1.382775000 |
| 1  | 0.903901000  | 9.607141000  | 0.003197000  |
| 6  | 2.802034000  | 9.368817000  | 2.014444000  |
| 1  | 3.615257000  | 9.727213000  | 2.653447000  |
| 1  | 2.756686000  | 8.276089000  | 2.101168000  |
| 1  | 1.855474000  | 9.776528000  | 2.391888000  |
| 6  | 4.371912000  | 9.205797000  | 0.032884000  |
| 1  | 5.211334000  | 9.568805000  | 0.634969000  |
| 1  | 4.549966000  | 9.491793000  | -1.011381000 |
| 1  | 4.363461000  | 8.110458000  | 0.087631000  |
| 6  | 8.710450000  | 15.015272000 | 3.804641000  |
| 1  | 9.010507000  | 15.966736000 | 4.262938000  |
| 1  | 9.323668000  | 14.878444000 | 2.911613000  |
| 6  | 9.009787000  | 13.780880000 | 4.725871000  |
| 6  | 8.661134000  | 14.014321000 | 6.219290000  |
| 6  | 8.206275000  | 12.922076000 | 6.978593000  |
| 1  | 8.052137000  | 11.978225000 | 6.470375000  |
| 6  | 7.947461000  | 13.050673000 | 8.347236000  |
| 1  | 7.600400000  | 12.190715000 | 8.912605000  |
| 6  | 8.133736000  | 14.282454000 | 8.989285000  |
| 1  | 7.931961000  | 14.384998000 | 10.051054000 |
| 6  | 8.582731000  | 15.379211000 | 8.245910000  |
| 1  | 8.729194000  | 16.341322000 | 8.728006000  |
| 6  | 8.846285000  | 15.244907000 | 6.875469000  |
| 1  | 9.196230000  | 16.115863000 | 6.331570000  |
| 6  | 10.536463000 | 13.496011000 | 4.631093000  |
| 6  | 11.502548000 | 14.453092000 | 4.992480000  |
| 1  | 11.198564000 | 15.419360000 | 5.380775000  |
| 6  | 12.869657000 | 14.172725000 | 4.873552000  |
| 1  | 13.599130000 | 14.925191000 | 5.158179000  |
| 6  | 13.296236000 | 12.925364000 | 4.397688000  |
| 1  | 14.355918000 | 12.705094000 | 4.312981000  |
| 6  | 12.341457000 | 11.964911000 | 4.039665000  |
| 1  | 12.659033000 | 10.993228000 | 3.672429000  |
| 6  | 10.974435000 | 12.251335000 | 4.152095000  |
| 1  | 10.221805000 | 11.524298000 | 3.874459000  |
| 7  | 4.302800000  | 11.646578000 | 5.290061000  |
| 1  | 4.821895000  | 11.337286000 | 4.443694000  |
| 7  | 5.290260000  | 13.711246000 | 4.871366000  |
| 7  | 7.290631000  | 15.078074000 | 3.344993000  |
| 7  | 5.495587000  | 13.815265000 | 1.529959000  |
| 7  | 4.082276000  | 12.004810000 | 1.092857000  |
| 1  | 4.672543000  | 11.495176000 | 1.785774000  |
| 8  | 8.284603000  | 12.675251000 | 4.207121000  |
| 6  | 10.234031000 | 11.599885000 | -1.237000000 |
| 6  | 10.593335000 | 10.225710000 | -0.686567000 |
| 6  | 11.920860000 | 9.899773000  | -0.359843000 |
| 6  | 12.262516000 | 8.615598000  | 0.086921000  |
| 6  | 11.261020000 | 7.660236000  | 0.201574000  |
| 6  | 9.933255000  | 7.940484000  | -0.121218000 |
| 6  | 9.609511000  | 9.222383000  | -0.566398000 |
| 1  | 9.167170000  | 7.181292000  | -0.025886000 |
| 17 | 11.693543000 | 5.981871000  | 0.791370000  |
| 1  | 13.289337000 | 8.378194000  | 0.335042000  |
| 1  | 12.705975000 | 10.637359000 | -0.458497000 |
| 1  | 8.578206000  | 9.448581000  | -0.808940000 |
| 6  | 11.296890000 | 12.663373000 | -0.995402000 |
| 6  | 11.681525000 | 13.005909000 | 0.317479000  |
| 1  | 11.178752000 | 12.555587000 | 1.164886000  |
| 6  | 12.697323000 | 13.932309000 | 0.556391000  |
| 1  | 12.980140000 | 14.183886000 | 1.571031000  |

|    |              |              |              |
|----|--------------|--------------|--------------|
| 6  | 13.335219000 | 14.519943000 | -0.535734000 |
| 17 | 14.665920000 | 15.741636000 | -0.232628000 |
| 6  | 12.993601000 | 14.204842000 | -1.844678000 |
| 1  | 13.505161000 | 14.665847000 | -2.680211000 |
| 6  | 11.971185000 | 13.272052000 | -2.068024000 |
| 1  | 11.717233000 | 13.019958000 | -3.088982000 |
| 6  | 9.701217000  | 11.571483000 | -2.664059000 |
| 6  | 9.941580000  | 10.468830000 | -3.502077000 |
| 6  | 9.513899000  | 10.466628000 | -4.837001000 |
| 1  | 9.705978000  | 9.610445000  | -5.471335000 |
| 1  | 10.473396000 | 9.603598000  | -3.129190000 |
| 6  | 9.025726000  | 12.685678000 | -3.202739000 |
| 1  | 8.823245000  | 13.545666000 | -2.576071000 |
| 6  | 8.591928000  | 12.697945000 | -4.528680000 |
| 1  | 8.067091000  | 13.556708000 | -4.927816000 |
| 6  | 8.843563000  | 11.580937000 | -5.324941000 |
| 17 | 8.272457000  | 11.586772000 | -7.064573000 |
| 35 | 8.537079000  | 12.242088000 | -0.029994000 |

Data for 2<sub>Cl</sub>:

<sup>5</sup>Re<sub>2Cl</sub>:

|    |              |              |              |
|----|--------------|--------------|--------------|
| 26 | 6.504002000  | 12.405875000 | 4.223576000  |
| 17 | 8.011659000  | 11.279591000 | 2.554948000  |
| 17 | 5.192828000  | 10.347857000 | 4.433364000  |
| 6  | 2.817131000  | 10.562006000 | 8.138425000  |
| 1  | 3.863658000  | 10.838138000 | 7.965002000  |
| 1  | 2.584068000  | 9.692977000  | 7.510377000  |
| 1  | 2.720159000  | 10.256712000 | 9.187068000  |
| 6  | 0.404996000  | 11.311681000 | 8.094989000  |
| 1  | 0.274274000  | 11.021283000 | 9.143854000  |
| 1  | 0.125845000  | 10.454091000 | 7.470180000  |
| 1  | -0.293304000 | 12.130999000 | 7.882112000  |
| 6  | 2.224522000  | 12.944281000 | 8.732138000  |
| 1  | 3.248204000  | 13.288466000 | 8.547013000  |
| 1  | 2.151363000  | 12.661445000 | 9.789224000  |
| 1  | 1.541959000  | 13.786099000 | 8.562493000  |
| 6  | 1.867143000  | 11.741975000 | 7.831644000  |
| 6  | 1.968568000  | 12.125978000 | 6.323157000  |
| 1  | 1.664419000  | 11.257124000 | 5.727809000  |
| 1  | 1.253274000  | 12.922713000 | 6.099069000  |
| 6  | 3.778364000  | 13.774085000 | 5.675442000  |
| 6  | 2.972704000  | 14.928526000 | 5.885452000  |
| 1  | 1.938869000  | 14.819585000 | 6.178072000  |
| 6  | 3.521357000  | 16.185562000 | 5.723078000  |
| 1  | 2.906527000  | 17.066761000 | 5.869921000  |
| 6  | 4.880677000  | 16.318011000 | 5.391492000  |
| 1  | 5.346745000  | 17.291435000 | 5.304916000  |
| 6  | 5.629544000  | 15.164487000 | 5.201005000  |
| 6  | 7.125908000  | 15.277628000 | 5.054259000  |
| 1  | 7.391205000  | 16.267636000 | 4.665485000  |
| 1  | 7.552894000  | 15.201965000 | 6.057529000  |
| 6  | 7.876974000  | 14.641852000 | 2.783993000  |
| 1  | 8.556129000  | 13.941687000 | 2.289018000  |
| 1  | 8.302609000  | 15.649965000 | 2.709300000  |
| 6  | 6.539111000  | 14.580085000 | 2.092277000  |
| 6  | 6.194199000  | 15.522864000 | 1.133668000  |
| 1  | 6.852364000  | 16.357752000 | 0.929143000  |
| 6  | 4.979204000  | 15.361393000 | 0.447218000  |
| 1  | 4.670770000  | 16.087917000 | -0.296442000 |
| 6  | 4.174562000  | 14.270373000 | 0.718720000  |
| 1  | 3.239294000  | 14.138870000 | 0.194794000  |
| 6  | 4.577652000  | 13.320522000 | 1.701078000  |
| 6  | 2.628257000  | 11.879332000 | 1.163902000  |
| 1  | 2.866196000  | 11.969219000 | 0.095024000  |
| 1  | 1.831773000  | 12.605855000 | 1.383663000  |
| 6  | 2.074951000  | 10.451329000 | 1.409125000  |
| 6  | 0.864408000  | 10.278132000 | 0.458888000  |
| 1  | 0.418341000  | 9.286202000  | 0.592868000  |
| 1  | 1.167621000  | 10.374223000 | -0.590803000 |
| 1  | 0.089894000  | 11.027896000 | 0.662513000  |
| 6  | 1.593620000  | 10.285802000 | 2.868897000  |
| 1  | 2.419789000  | 10.371477000 | 3.581603000  |
| 1  | 1.138941000  | 9.297332000  | 3.005117000  |
| 1  | 0.839817000  | 11.043016000 | 3.118108000  |
| 6  | 3.141228000  | 9.383590000  | 1.070532000  |
| 1  | 4.008420000  | 9.444976000  | 1.736176000  |
| 1  | 3.494063000  | 9.497317000  | 0.038402000  |
| 1  | 2.712812000  | 8.379601000  | 1.174129000  |
| 6  | 9.077419000  | 13.757935000 | 4.779127000  |
| 1  | 9.697688000  | 14.619315000 | 5.053300000  |
| 1  | 9.577172000  | 13.197559000 | 3.989801000  |
| 6  | 8.834613000  | 12.787606000 | 5.984557000  |
| 6  | 8.683427000  | 13.512136000 | 7.344251000  |
| 6  | 7.580315000  | 13.245359000 | 8.170891000  |
| 1  | 6.823802000  | 12.552382000 | 7.825649000  |
| 6  | 7.458077000  | 13.869819000 | 9.418998000  |
| 1  | 6.597699000  | 13.652791000 | 10.044566000 |
| 6  | 8.436998000  | 14.767574000 | 9.859490000  |
| 1  | 8.341527000  | 15.252374000 | 10.825744000 |
| 6  | 9.545386000  | 15.032563000 | 9.044322000  |
| 1  | 10.314632000 | 15.722136000 | 9.377485000  |
| 6  | 9.670133000  | 14.406383000 | 7.799414000  |
| 1  | 10.546429000 | 14.611783000 | 7.192626000  |

|    |              |              |              |
|----|--------------|--------------|--------------|
| 6  | 9.986552000  | 11.767634000 | 6.105046000  |
| 6  | 11.312250000 | 12.100204000 | 5.778743000  |
| 1  | 11.559180000 | 13.085073000 | 5.396079000  |
| 6  | 12.341266000 | 11.162661000 | 5.938168000  |
| 1  | 13.359130000 | 11.435307000 | 5.677556000  |
| 6  | 12.059135000 | 9.881829000  | 6.425496000  |
| 1  | 12.855974000 | 9.154979000  | 6.545887000  |
| 6  | 10.739462000 | 9.544715000  | 6.754089000  |
| 1  | 10.509010000 | 8.552708000  | 7.129869000  |
| 6  | 9.712162000  | 10.480850000 | 6.597403000  |
| 1  | 8.689959000  | 10.218311000 | 6.842208000  |
| 7  | 3.306430000  | 12.514070000 | 5.867400000  |
| 1  | 3.938275000  | 11.753221000 | 5.639704000  |
| 7  | 5.093050000  | 13.909197000 | 5.279854000  |
| 7  | 7.768401000  | 14.220616000 | 4.211783000  |
| 7  | 5.743392000  | 13.513115000 | 2.405867000  |
| 7  | 3.830608000  | 12.209175000 | 1.945019000  |
| 1  | 4.161176000  | 11.546022000 | 2.637191000  |
| 8  | 7.615469000  | 12.082783000 | 5.684336000  |
| 6  | 7.515002000  | 5.626620000  | -0.928533000 |
| 6  | 8.662994000  | 5.357512000  | -0.057219000 |
| 6  | 9.804655000  | 6.201149000  | -0.058964000 |
| 6  | 10.901977000 | 5.947421000  | 0.764806000  |
| 6  | 10.864383000 | 4.839914000  | 1.610394000  |
| 6  | 9.766415000  | 3.982185000  | 1.653911000  |
| 6  | 8.677161000  | 4.242698000  | 0.821698000  |
| 1  | 9.752820000  | 3.134899000  | 2.328424000  |
| 17 | 12.300802000 | 4.501116000  | 2.697442000  |
| 1  | 11.769498000 | 6.595294000  | 0.739761000  |
| 1  | 9.840668000  | 7.050908000  | -0.730144000 |
| 1  | 7.814652000  | 3.588640000  | 0.870309000  |
| 6  | 7.144605000  | 7.009413000  | -1.247470000 |
| 6  | 7.314614000  | 8.054984000  | -0.302956000 |
| 1  | 7.703823000  | 7.829351000  | 0.682813000  |
| 6  | 6.965487000  | 9.374061000  | -0.598110000 |
| 1  | 7.096337000  | 10.150442000 | 0.147459000  |
| 6  | 6.442861000  | 9.658226000  | -1.858300000 |
| 17 | 5.983549000  | 11.389351000 | -2.261120000 |
| 6  | 6.256520000  | 8.670254000  | -2.824318000 |
| 1  | 5.859601000  | 8.918312000  | -3.801125000 |
| 6  | 6.604115000  | 7.354840000  | -2.513890000 |
| 1  | 6.479101000  | 6.588258000  | -3.269502000 |
| 6  | 6.738123000  | 4.513311000  | -1.482634000 |
| 6  | 7.354930000  | 3.282332000  | -1.828137000 |
| 6  | 6.620760000  | 2.220892000  | -2.358772000 |
| 1  | 7.111281000  | 1.294041000  | -2.629821000 |
| 1  | 8.424735000  | 3.166718000  | -1.701090000 |
| 6  | 5.338883000  | 4.624292000  | -1.694774000 |
| 1  | 4.828448000  | 5.540542000  | -1.422760000 |
| 6  | 4.593375000  | 3.567494000  | -2.218822000 |
| 1  | 3.524017000  | 3.665668000  | -2.359937000 |
| 6  | 5.248444000  | 2.380883000  | -2.544442000 |
| 17 | 4.276373000  | 0.989546000  | -3.237286000 |

<sup>5</sup>TS<sub>Cl<sub>2</sub>,2Cl</sub>:

|    |              |              |             |
|----|--------------|--------------|-------------|
| 26 | 6.152469000  | 11.772070000 | 3.822159000 |
| 17 | 7.851529000  | 10.655463000 | 1.482320000 |
| 17 | 4.370340000  | 9.935232000  | 3.466772000 |
| 6  | 1.826508000  | 9.968900000  | 6.984784000 |
| 1  | 2.919709000  | 10.036509000 | 6.948515000 |
| 1  | 1.494763000  | 9.350922000  | 6.140892000 |
| 1  | 1.550347000  | 9.452605000  | 7.912102000 |
| 6  | -0.360519000 | 11.232123000 | 6.989356000 |
| 1  | -0.668404000 | 10.736553000 | 7.917596000 |
| 1  | -0.734289000 | 10.634761000 | 6.148136000 |
| 1  | -0.849191000 | 12.214179000 | 6.953288000 |
| 6  | 1.666906000  | 12.210902000 | 8.134819000 |
| 1  | 2.752579000  | 12.354323000 | 8.102102000 |
| 1  | 1.421713000  | 11.705864000 | 9.077202000 |
| 1  | 1.189885000  | 13.198693000 | 8.150113000 |
| 6  | 1.178766000  | 11.371274000 | 6.934410000 |
| 6  | 1.533768000  | 12.069651000 | 5.585177000 |
| 1  | 1.131886000  | 11.456089000 | 4.769627000 |
| 1  | 1.020586000  | 13.035450000 | 5.531390000 |
| 6  | 3.686195000  | 13.396068000 | 5.492135000 |

|   |              |              |              |
|---|--------------|--------------|--------------|
| 6 | 3.120576000  | 14.611275000 | 5.964563000  |
| 1 | 2.070113000  | 14.667027000 | 6.211856000  |
| 6 | 3.933427000  | 15.723454000 | 6.110172000  |
| 1 | 3.508251000  | 16.659061000 | 6.458412000  |
| 6 | 5.304381000  | 15.635760000 | 5.821048000  |
| 1 | 5.962213000  | 16.486428000 | 5.951639000  |
| 6 | 5.810605000  | 14.415865000 | 5.376544000  |
| 6 | 7.307381000  | 14.242926000 | 5.225030000  |
| 1 | 7.776271000  | 15.225064000 | 5.069531000  |
| 1 | 7.681927000  | 13.858661000 | 6.178049000  |
| 6 | 7.913848000  | 13.949764000 | 2.842521000  |
| 1 | 8.425657000  | 13.227304000 | 2.197159000  |
| 1 | 8.534561000  | 14.853726000 | 2.926571000  |
| 6 | 6.598172000  | 14.289168000 | 2.182652000  |
| 6 | 6.434869000  | 15.498816000 | 1.514658000  |
| 1 | 7.223305000  | 16.240969000 | 1.532665000  |
| 6 | 5.231903000  | 15.726023000 | 0.828020000  |
| 1 | 5.064620000  | 16.666434000 | 0.313501000  |
| 6 | 4.254551000  | 14.745913000 | 0.806950000  |
| 1 | 3.323612000  | 14.913416000 | 0.284683000  |
| 6 | 4.477893000  | 13.517897000 | 1.492728000  |
| 6 | 2.361158000  | 12.579718000 | 0.601301000  |
| 1 | 2.654221000  | 12.929315000 | -0.398866000 |
| 1 | 1.657734000  | 13.322921000 | 1.008464000  |
| 6 | 1.607036000  | 11.234894000 | 0.429991000  |
| 6 | 0.448200000  | 11.500518000 | -0.562698000 |
| 1 | -0.138665000 | 10.587087000 | -0.712103000 |
| 1 | 0.829063000  | 11.822926000 | -1.539613000 |
| 1 | -0.227467000 | 12.277998000 | -0.184703000 |
| 6 | 1.013893000  | 10.755932000 | 1.775188000  |
| 1 | 1.796961000  | 10.525246000 | 2.504311000  |
| 1 | 0.421463000  | 9.845414000  | 1.622348000  |
| 1 | 0.352642000  | 11.520922000 | 2.201450000  |
| 6 | 2.541014000  | 10.152375000 | -0.159624000 |
| 1 | 3.359146000  | 9.905487000  | 0.524649000  |
| 1 | 2.975301000  | 10.486492000 | -1.110119000 |
| 1 | 1.975051000  | 9.232607000  | -0.350849000 |
| 6 | 8.920666000  | 12.470557000 | 4.557392000  |
| 1 | 9.709815000  | 13.107239000 | 4.981348000  |
| 1 | 9.292692000  | 12.015210000 | 3.638998000  |
| 6 | 8.517033000  | 11.294854000 | 5.518850000  |
| 6 | 8.482427000  | 11.713095000 | 7.018383000  |
| 6 | 7.390284000  | 11.328933000 | 7.813463000  |
| 1 | 6.583202000  | 10.786802000 | 7.337052000  |
| 6 | 7.344604000  | 11.645612000 | 9.176925000  |
| 1 | 6.489445000  | 11.338072000 | 9.771929000  |
| 6 | 8.394157000  | 12.355136000 | 9.773179000  |
| 1 | 8.359634000  | 12.603915000 | 10.829360000 |
| 6 | 9.491993000  | 12.739646000 | 8.992424000  |
| 1 | 10.314421000 | 13.288312000 | 9.441892000  |
| 6 | 9.537296000  | 12.416730000 | 7.630693000  |
| 1 | 10.405731000 | 12.716174000 | 7.052819000  |
| 6 | 9.574327000  | 10.165005000 | 5.391972000  |
| 6 | 10.952225000 | 10.427848000 | 5.281739000  |
| 1 | 11.317661000 | 11.449069000 | 5.253888000  |
| 6 | 11.880001000 | 9.380741000  | 5.203408000  |
| 1 | 12.938840000 | 9.606792000  | 5.118459000  |
| 6 | 11.446205000 | 8.049691000  | 5.240324000  |
| 1 | 12.164981000 | 7.237292000  | 5.191735000  |
| 6 | 10.074587000 | 7.778009000  | 5.347427000  |
| 1 | 9.725723000  | 6.750014000  | 5.377766000  |
| 6 | 9.149523000  | 8.826707000  | 5.418022000  |
| 1 | 8.086765000  | 8.630024000  | 5.484269000  |
| 7 | 2.961464000  | 12.252572000 | 5.326627000  |
| 1 | 3.454840000  | 11.465233000 | 4.912137000  |
| 7 | 5.022592000  | 13.323240000 | 5.180398000  |
| 7 | 7.737267000  | 13.292586000 | 4.164274000  |
| 7 | 5.635753000  | 13.320901000 | 2.205124000  |
| 7 | 3.562825000  | 12.507946000 | 1.442557000  |
| 1 | 3.753984000  | 11.661639000 | 1.972670000  |
| 8 | 7.240706000  | 10.815417000 | 5.117094000  |
| 6 | 8.266675000  | 7.237203000  | 0.412264000  |
| 6 | 9.707866000  | 7.334586000  | 0.272930000  |
| 6 | 10.338058000 | 7.188237000  | -0.992021000 |
| 6 | 11.721649000 | 7.276880000  | -1.112033000 |

|    |              |             |              |
|----|--------------|-------------|--------------|
| 6  | 12.479053000 | 7.537082000 | 0.032834000  |
| 6  | 11.899699000 | 7.697648000 | 1.293604000  |
| 6  | 10.518475000 | 7.583137000 | 1.413699000  |
| 1  | 12.507348000 | 7.917932000 | 2.161546000  |
| 17 | 14.282386000 | 7.670120000 | -0.125304000 |
| 1  | 12.202021000 | 7.139405000 | -2.071903000 |
| 1  | 9.745184000  | 6.954863000 | -1.867523000 |
| 1  | 10.057232000 | 7.744021000 | 2.380316000  |
| 6  | 7.391214000  | 7.667330000 | -0.657743000 |
| 6  | 7.755536000  | 8.745000000 | -1.510973000 |
| 1  | 8.658557000  | 9.304825000 | -1.309742000 |
| 6  | 6.916660000  | 9.150487000 | -2.543136000 |
| 1  | 7.184269000  | 9.988070000 | -3.173765000 |
| 6  | 5.710988000  | 8.470835000 | -2.735014000 |
| 17 | 4.621113000  | 8.991089000 | -4.089748000 |
| 6  | 5.311503000  | 7.408714000 | -1.920275000 |
| 1  | 4.376551000  | 6.894876000 | -2.101094000 |
| 6  | 6.146372000  | 7.017020000 | -0.878245000 |
| 1  | 5.861724000  | 6.173508000 | -0.262310000 |
| 6  | 7.704874000  | 6.658077000 | 1.619646000  |
| 6  | 8.338986000  | 5.556783000 | 2.255814000  |
| 6  | 7.782961000  | 4.978321000 | 3.392716000  |
| 1  | 8.245871000  | 4.116863000 | 3.856234000  |
| 1  | 9.234361000  | 5.125555000 | 1.825224000  |
| 6  | 6.514197000  | 7.184375000 | 2.186317000  |
| 1  | 6.064560000  | 8.077571000 | 1.771123000  |
| 6  | 5.977922000  | 6.633484000 | 3.347102000  |
| 1  | 5.101229000  | 7.079374000 | 3.798304000  |
| 6  | 6.612109000  | 5.530341000 | 3.920730000  |
| 17 | 5.898464000  | 4.788254000 | 5.417672000  |

<sup>5</sup>P<sub>ci2,2ci</sub>:-

|    |              |              |              |
|----|--------------|--------------|--------------|
| 26 | 5.714060000  | 11.122203000 | 3.946468000  |
| 17 | 9.595943000  | 9.241358000  | 0.816631000  |
| 17 | 3.835932000  | 9.403394000  | 3.988607000  |
| 6  | 1.576356000  | 10.666121000 | 7.519399000  |
| 1  | 2.662129000  | 10.552190000 | 7.422503000  |
| 1  | 1.095862000  | 9.948049000  | 6.843024000  |
| 1  | 1.300374000  | 10.399928000 | 8.546736000  |
| 6  | -0.399340000 | 12.232207000 | 7.353318000  |
| 1  | -0.702068000 | 11.996175000 | 8.380126000  |
| 1  | -0.919895000 | 11.539473000 | 6.680273000  |
| 1  | -0.741442000 | 13.250069000 | 7.126692000  |
| 6  | 1.829795000  | 13.093281000 | 8.169780000  |
| 1  | 2.919386000  | 13.054275000 | 8.061188000  |
| 1  | 1.585809000  | 12.837339000 | 9.208004000  |
| 1  | 1.502443000  | 14.125526000 | 7.993845000  |
| 6  | 1.135089000  | 12.112407000 | 7.200274000  |
| 6  | 1.478709000  | 12.456604000 | 5.718418000  |
| 1  | 0.925847000  | 11.765563000 | 5.070590000  |
| 1  | 1.116178000  | 13.462603000 | 5.484593000  |
| 6  | 3.788458000  | 13.369907000 | 5.233842000  |
| 6  | 3.457810000  | 14.729520000 | 5.479417000  |
| 1  | 2.458163000  | 15.002883000 | 5.784499000  |
| 6  | 4.433610000  | 15.700891000 | 5.329995000  |
| 1  | 4.185408000  | 16.742351000 | 5.505068000  |
| 6  | 5.741984000  | 15.340599000 | 4.966869000  |
| 1  | 6.523225000  | 16.084188000 | 4.868191000  |
| 6  | 6.021145000  | 13.994313000 | 4.752750000  |
| 6  | 7.452738000  | 13.551653000 | 4.522957000  |
| 1  | 8.018108000  | 14.369033000 | 4.054350000  |
| 1  | 7.899009000  | 13.381156000 | 5.507570000  |
| 6  | 7.762189000  | 12.543560000 | 2.278640000  |
| 1  | 8.152002000  | 11.623361000 | 1.829692000  |
| 1  | 8.494803000  | 13.340353000 | 2.087020000  |
| 6  | 6.458108000  | 12.877573000 | 1.593165000  |
| 6  | 6.409077000  | 13.885878000 | 0.638921000  |
| 1  | 7.285794000  | 14.488861000 | 0.438582000  |
| 6  | 5.202939000  | 14.097812000 | -0.050118000 |
| 1  | 5.127377000  | 14.887388000 | -0.790015000 |
| 6  | 4.108588000  | 13.296221000 | 0.216359000  |
| 1  | 3.176246000  | 13.453077000 | -0.306300000 |
| 6  | 4.211015000  | 12.267267000 | 1.197390000  |
| 6  | 1.915063000  | 11.482531000 | 0.676460000  |
| 1  | 2.162799000  | 11.500160000 | -0.394346000 |

|    |              |              |              |
|----|--------------|--------------|--------------|
| 1  | 1.374207000  | 12.415205000 | 0.898630000  |
| 6  | 0.956537000  | 10.288101000 | 0.922065000  |
| 6  | -0.244720000 | 10.481662000 | -0.036200000 |
| 1  | -0.970740000 | 9.671918000  | 0.098936000  |
| 1  | 0.078681000  | 10.475166000 | -1.084398000 |
| 1  | -0.758131000 | 11.431643000 | 0.158057000  |
| 6  | 0.438389000  | 10.281058000 | 2.379150000  |
| 1  | 1.248039000  | 10.119748000 | 3.097542000  |
| 1  | -0.292116000 | 9.474326000  | 2.514265000  |
| 1  | -0.058352000 | 11.229763000 | 2.618752000  |
| 6  | 1.655518000  | 8.948144000  | 0.593629000  |
| 1  | 2.499668000  | 8.754522000  | 1.263493000  |
| 1  | 2.026687000  | 8.945092000  | -0.438892000 |
| 1  | 0.947129000  | 8.118059000  | 0.700720000  |
| 6  | 8.680488000  | 11.392743000 | 4.270628000  |
| 1  | 9.578736000  | 11.969839000 | 4.525085000  |
| 1  | 8.943110000  | 10.706472000 | 3.463693000  |
| 6  | 8.168497000  | 10.511343000 | 5.461385000  |
| 6  | 8.240020000  | 11.226771000 | 6.838921000  |
| 6  | 7.171004000  | 11.085403000 | 7.739508000  |
| 1  | 6.309432000  | 10.511024000 | 7.423366000  |
| 6  | 7.216034000  | 11.672116000 | 9.010033000  |
| 1  | 6.377654000  | 11.547786000 | 9.689165000  |
| 6  | 8.334752000  | 12.415270000 | 9.406276000  |
| 1  | 8.370302000  | 12.873198000 | 10.389823000 |
| 6  | 9.410094000  | 12.559001000 | 8.520894000  |
| 1  | 10.285692000 | 13.129845000 | 8.815161000  |
| 6  | 9.364791000  | 11.966243000 | 7.252524000  |
| 1  | 10.218745000 | 12.086843000 | 6.593903000  |
| 6  | 9.052179000  | 9.237980000  | 5.543507000  |
| 6  | 10.455935000 | 9.289484000  | 5.462042000  |
| 1  | 10.967473000 | 10.237699000 | 5.332490000  |
| 6  | 11.221366000 | 8.119170000  | 5.542806000  |
| 1  | 12.303345000 | 8.179657000  | 5.472358000  |
| 6  | 10.596721000 | 6.877597000  | 5.714125000  |
| 1  | 11.190091000 | 5.970811000  | 5.779340000  |
| 6  | 9.199982000  | 6.817865000  | 5.799317000  |
| 1  | 8.703695000  | 5.860677000  | 5.929617000  |
| 6  | 8.436146000  | 7.987837000  | 5.711290000  |
| 1  | 7.355016000  | 7.954234000  | 5.757720000  |
| 7  | 2.893977000  | 12.348779000 | 5.356992000  |
| 1  | 3.230722000  | 11.419533000 | 5.117707000  |
| 7  | 5.064050000  | 13.027960000 | 4.850366000  |
| 7  | 7.610772000  | 12.294866000 | 3.737950000  |
| 7  | 5.381487000  | 12.090531000 | 1.900685000  |
| 7  | 3.165399000  | 11.433158000 | 1.447524000  |
| 1  | 3.280715000  | 10.726887000 | 2.170185000  |
| 8  | 6.826007000  | 10.140728000 | 5.169954000  |
| 6  | 8.880855000  | 7.604546000  | -0.248519000 |
| 6  | 10.146089000 | 6.874705000  | -0.663610000 |
| 6  | 10.347332000 | 6.471263000  | -1.994923000 |
| 6  | 11.487171000 | 5.744036000  | -2.364142000 |
| 6  | 12.422603000 | 5.428185000  | -1.386898000 |
| 6  | 12.255869000 | 5.804501000  | -0.054069000 |
| 6  | 11.113910000 | 6.522955000  | 0.300115000  |
| 1  | 12.997656000 | 5.547148000  | 0.691360000  |
| 17 | 13.919442000 | 4.486733000  | -1.859181000 |
| 1  | 11.630667000 | 5.435974000  | -3.392085000 |
| 1  | 9.614455000  | 6.705598000  | -2.755541000 |
| 1  | 10.981228000 | 6.826040000  | 1.331540000  |
| 6  | 8.108147000  | 8.238810000  | -1.391291000 |
| 6  | 8.719312000  | 9.204772000  | -2.217547000 |
| 1  | 9.728134000  | 9.535121000  | -2.002390000 |
| 6  | 8.038613000  | 9.764499000  | -3.298789000 |
| 1  | 8.513699000  | 10.512126000 | -3.921302000 |
| 6  | 6.733669000  | 9.344499000  | -3.556754000 |
| 17 | 5.832499000  | 10.077176000 | -4.971366000 |
| 6  | 6.099361000  | 8.388162000  | -2.773832000 |
| 1  | 5.088049000  | 8.070480000  | -2.993716000 |
| 6  | 6.794017000  | 7.837744000  | -1.688046000 |
| 1  | 6.301357000  | 7.086065000  | -1.085753000 |
| 6  | 8.025407000  | 6.853745000  | 0.756259000  |
| 6  | 8.156599000  | 5.462087000  | 0.910822000  |
| 6  | 7.325819000  | 4.752430000  | 1.787761000  |
| 1  | 7.434018000  | 3.680707000  | 1.896743000  |

|    |             |             |             |
|----|-------------|-------------|-------------|
| 1  | 8.896214000 | 4.914380000 | 0.341926000 |
| 6  | 7.030694000 | 7.521472000 | 1.499818000 |
| 1  | 6.913362000 | 8.594118000 | 1.403713000 |
| 6  | 6.199618000 | 6.829813000 | 2.382875000 |
| 1  | 5.448526000 | 7.362519000 | 2.955331000 |
| 6  | 6.366038000 | 5.451189000 | 2.509745000 |
| 17 | 5.284030000 | 4.530617000 | 3.665186000 |

<sup>5</sup>TS<sub>Cl3,2Cl</sub>:

|    |              |              |              |
|----|--------------|--------------|--------------|
| 26 | 7.135623000  | 12.097495000 | 3.269824000  |
| 17 | 8.804193000  | 11.710839000 | 1.517126000  |
| 17 | 5.907847000  | 9.445343000  | 2.352631000  |
| 6  | 4.498122000  | 8.127176000  | 5.987697000  |
| 1  | 5.408459000  | 8.733826000  | 5.919359000  |
| 1  | 4.377229000  | 7.583741000  | 5.042334000  |
| 1  | 4.644074000  | 7.389767000  | 6.786088000  |
| 6  | 2.003087000  | 8.113011000  | 6.376575000  |
| 1  | 2.107277000  | 7.382161000  | 7.186974000  |
| 1  | 1.842707000  | 7.560172000  | 5.442395000  |
| 1  | 1.106021000  | 8.712844000  | 6.576393000  |
| 6  | 3.467992000  | 9.745240000  | 7.627306000  |
| 1  | 4.327958000  | 10.421931000 | 7.581075000  |
| 1  | 3.649284000  | 9.023562000  | 8.433364000  |
| 1  | 2.582121000  | 10.332776000 | 7.898052000  |
| 6  | 3.262945000  | 9.006309000  | 6.286969000  |
| 6  | 3.028199000  | 10.013062000 | 5.117853000  |
| 1  | 2.818702000  | 9.432817000  | 4.210706000  |
| 1  | 2.130762000  | 10.606099000 | 5.322094000  |
| 6  | 4.306240000  | 12.206208000 | 5.211613000  |
| 6  | 3.381677000  | 12.846816000 | 6.071553000  |
| 1  | 2.500437000  | 12.324935000 | 6.415117000  |
| 6  | 3.638746000  | 14.142460000 | 6.495972000  |
| 1  | 2.941339000  | 14.641406000 | 7.160607000  |
| 6  | 4.807116000  | 14.788840000 | 6.081682000  |
| 1  | 5.048619000  | 15.788781000 | 6.422653000  |
| 6  | 5.669857000  | 14.118766000 | 5.209450000  |
| 6  | 6.913639000  | 14.857601000 | 4.762050000  |
| 1  | 6.590032000  | 15.731543000 | 4.184025000  |
| 1  | 7.415093000  | 15.252274000 | 5.653371000  |
| 6  | 8.156893000  | 14.791313000 | 2.656370000  |
| 1  | 8.965145000  | 14.253969000 | 2.152816000  |
| 1  | 8.481017000  | 15.827947000 | 2.826717000  |
| 6  | 6.938582000  | 14.774977000 | 1.760172000  |
| 6  | 6.637994000  | 15.872414000 | 0.958691000  |
| 1  | 7.241654000  | 16.769897000 | 1.014226000  |
| 6  | 5.540989000  | 15.782274000 | 0.087973000  |
| 1  | 5.276020000  | 16.621364000 | -0.546325000 |
| 6  | 4.786177000  | 14.621833000 | 0.043753000  |
| 1  | 3.930898000  | 14.554407000 | -0.612281000 |
| 6  | 5.136371000  | 13.530343000 | 0.882603000  |
| 6  | 3.404276000  | 11.957935000 | -0.082989000 |
| 1  | 3.609993000  | 10.924020000 | -0.388488000 |
| 1  | 3.490907000  | 12.571266000 | -0.985802000 |
| 6  | 1.940846000  | 12.022133000 | 0.449991000  |
| 6  | 1.012565000  | 11.576897000 | -0.704172000 |
| 1  | -0.034332000 | 11.584286000 | -0.379129000 |
| 1  | 1.254847000  | 10.559970000 | -1.037887000 |
| 1  | 1.102995000  | 12.248693000 | -1.567080000 |
| 6  | 1.570764000  | 13.455061000 | 0.890537000  |
| 1  | 2.240426000  | 13.811547000 | 1.681111000  |
| 1  | 0.546140000  | 13.478072000 | 1.281132000  |
| 1  | 1.622572000  | 14.158220000 | 0.050361000  |
| 6  | 1.779977000  | 11.057572000 | 1.645394000  |
| 1  | 2.450468000  | 11.333030000 | 2.466731000  |
| 1  | 2.004717000  | 10.024624000 | 1.348744000  |
| 1  | 0.751075000  | 11.082411000 | 2.023853000  |
| 6  | 9.135082000  | 13.685488000 | 4.657851000  |
| 1  | 9.540434000  | 14.527794000 | 5.234339000  |
| 1  | 9.861521000  | 13.429850000 | 3.884616000  |
| 6  | 8.952774000  | 12.392834000 | 5.531515000  |
| 6  | 8.313564000  | 12.651140000 | 6.921411000  |
| 6  | 7.504084000  | 11.647196000 | 7.481441000  |
| 1  | 7.309016000  | 10.762128000 | 6.888877000  |
| 6  | 6.954794000  | 11.789689000 | 8.759931000  |
| 1  | 6.336130000  | 10.997326000 | 9.171042000  |



|    |              |              |              |
|----|--------------|--------------|--------------|
| 6  | 7.198823000  | 12.948572000 | 9.509259000  |
| 1  | 6.770354000  | 13.063223000 | 10.500096000 |
| 6  | 8.004249000  | 13.955255000 | 8.966687000  |
| 1  | 8.204663000  | 14.858818000 | 9.534824000  |
| 6  | 8.560716000  | 13.804605000 | 7.688334000  |
| 1  | 9.188860000  | 14.601613000 | 7.304632000  |
| 6  | 10.372266000 | 11.799271000 | 5.762935000  |
| 6  | 11.390214000 | 12.531646000 | 6.401845000  |
| 1  | 11.194472000 | 13.530153000 | 6.778308000  |
| 6  | 12.666455000 | 11.982829000 | 6.576197000  |
| 1  | 13.438921000 | 12.565583000 | 7.069378000  |
| 6  | 12.946128000 | 10.687839000 | 6.120971000  |
| 1  | 13.934932000 | 10.261101000 | 6.258658000  |
| 6  | 11.938142000 | 9.950515000  | 5.488207000  |
| 1  | 12.142863000 | 8.945945000  | 5.129421000  |
| 6  | 10.664070000 | 10.504466000 | 5.308585000  |
| 1  | 9.877272000  | 9.951749000  | 4.811627000  |
| 7  | 4.143140000  | 10.909366000 | 4.803113000  |
| 1  | 4.864331000  | 10.526542000 | 4.208308000  |
| 7  | 5.422131000  | 12.868794000 | 4.748285000  |
| 7  | 7.884476000  | 14.087910000 | 3.941947000  |
| 7  | 6.201300000  | 13.626287000 | 1.740748000  |
| 7  | 4.452440000  | 12.344419000 | 0.866966000  |
| 1  | 4.810151000  | 11.608120000 | 1.459972000  |
| 8  | 8.158978000  | 11.471162000 | 4.787242000  |
| 6  | 6.451090000  | 7.622485000  | 1.232541000  |
| 6  | 7.845142000  | 7.363420000  | 1.728434000  |
| 6  | 8.904557000  | 7.160605000  | 0.823315000  |
| 6  | 10.189031000 | 6.839190000  | 1.278239000  |
| 6  | 10.405259000 | 6.731202000  | 2.646743000  |
| 6  | 9.383402000  | 6.929981000  | 3.576847000  |
| 6  | 8.107011000  | 7.240648000  | 3.110849000  |
| 1  | 9.577164000  | 6.848688000  | 4.638767000  |
| 17 | 12.078130000 | 6.311530000  | 3.249950000  |
| 1  | 10.994226000 | 6.676582000  | 0.573295000  |
| 1  | 8.734135000  | 7.227477000  | -0.242768000 |
| 1  | 7.311942000  | 7.412823000  | 3.825834000  |
| 6  | 6.326555000  | 8.091617000  | -0.190005000 |
| 6  | 7.023151000  | 9.238161000  | -0.632653000 |
| 1  | 7.595678000  | 9.835743000  | 0.070608000  |
| 6  | 6.956418000  | 9.643794000  | -1.965473000 |
| 1  | 7.483343000  | 10.530679000 | -2.294425000 |
| 6  | 6.195778000  | 8.890833000  | -2.860883000 |
| 17 | 6.104899000  | 9.421308000  | -4.608385000 |
| 6  | 5.505674000  | 7.750429000  | -2.466494000 |
| 1  | 4.929452000  | 7.174034000  | -3.178944000 |
| 6  | 5.571428000  | 7.356184000  | -1.124796000 |
| 1  | 5.048738000  | 6.458085000  | -0.823378000 |
| 6  | 5.390426000  | 6.667774000  | 1.708673000  |
| 6  | 5.732244000  | 5.403398000  | 2.225989000  |
| 6  | 4.742774000  | 4.490652000  | 2.611905000  |
| 1  | 5.017769000  | 3.518671000  | 3.001004000  |
| 1  | 6.769485000  | 5.108817000  | 2.312186000  |
| 6  | 4.021886000  | 6.994015000  | 1.582095000  |
| 1  | 3.735712000  | 7.965654000  | 1.199135000  |
| 6  | 3.027454000  | 6.098013000  | 1.970780000  |
| 1  | 1.981739000  | 6.362625000  | 1.879625000  |
| 6  | 3.408243000  | 4.856088000  | 2.482027000  |
| 17 | 2.110016000  | 3.676211000  | 2.991650000  |

<sup>5</sup>P<sub>C13,2Cj</sub>:

|    |              |              |             |
|----|--------------|--------------|-------------|
| 26 | 6.430756000  | 12.509515000 | 3.158835000 |
| 17 | 5.093845000  | 11.227955000 | 1.379382000 |
| 17 | 5.706669000  | 4.244092000  | 0.766263000 |
| 6  | 2.426362000  | 9.109404000  | 3.795531000 |
| 1  | 3.497095000  | 9.301143000  | 3.927221000 |
| 1  | 2.202170000  | 9.153277000  | 2.722319000 |
| 1  | 2.219272000  | 8.090259000  | 4.143330000 |
| 6  | 0.073341000  | 9.829025000  | 4.366642000 |
| 1  | -0.171968000 | 8.824314000  | 4.729895000 |
| 1  | -0.190788000 | 9.877309000  | 3.302748000 |
| 1  | -0.557017000 | 10.546431000 | 4.907417000 |
| 6  | 1.907791000  | 10.030042000 | 6.088342000 |
| 1  | 2.957148000  | 10.275933000 | 6.281657000 |
| 1  | 1.730110000  | 9.008704000  | 6.446989000 |

|   |              |              |              |
|---|--------------|--------------|--------------|
| 1 | 1.278793000  | 10.705601000 | 6.681369000  |
| 6 | 1.575335000  | 10.129781000 | 4.584049000  |
| 6 | 1.835589000  | 11.570051000 | 4.043348000  |
| 1 | 1.511359000  | 11.600127000 | 2.996047000  |
| 1 | 1.205693000  | 12.283435000 | 4.585214000  |
| 6 | 3.810897000  | 12.831394000 | 5.004420000  |
| 6 | 3.124711000  | 13.298308000 | 6.155036000  |
| 1 | 2.093714000  | 13.024406000 | 6.323851000  |
| 6 | 3.800358000  | 14.083095000 | 7.075580000  |
| 1 | 3.284690000  | 14.434563000 | 7.962918000  |
| 6 | 5.148897000  | 14.408514000 | 6.869603000  |
| 1 | 5.699101000  | 15.005175000 | 7.587020000  |
| 6 | 5.773182000  | 13.950052000 | 5.711802000  |
| 6 | 7.204060000  | 14.384204000 | 5.439227000  |
| 1 | 7.169242000  | 15.425233000 | 5.094659000  |
| 1 | 7.757588000  | 14.390782000 | 6.386427000  |
| 6 | 8.639067000  | 14.468683000 | 3.430141000  |
| 1 | 9.246691000  | 13.816011000 | 2.794605000  |
| 1 | 9.319026000  | 15.175257000 | 3.926406000  |
| 6 | 7.666463000  | 15.221270000 | 2.556509000  |
| 6 | 7.899719000  | 16.548986000 | 2.225202000  |
| 1 | 8.753971000  | 17.072181000 | 2.636043000  |
| 6 | 7.001548000  | 17.186689000 | 1.351200000  |
| 1 | 7.151949000  | 18.224748000 | 1.075231000  |
| 6 | 5.919150000  | 16.491335000 | 0.847769000  |
| 1 | 5.219405000  | 16.979996000 | 0.186297000  |
| 6 | 5.720006000  | 15.130704000 | 1.217863000  |
| 6 | 3.717970000  | 14.796292000 | -0.287009000 |
| 1 | 3.588365000  | 13.940130000 | -0.961010000 |
| 1 | 4.137477000  | 15.607538000 | -0.890692000 |
| 6 | 2.311123000  | 15.212446000 | 0.239934000  |
| 6 | 1.446046000  | 15.563971000 | -0.992817000 |
| 1 | 0.435840000  | 15.854756000 | -0.682016000 |
| 1 | 1.356930000  | 14.705778000 | -1.670540000 |
| 1 | 1.880175000  | 16.399940000 | -1.555623000 |
| 6 | 2.409132000  | 16.439533000 | 1.172268000  |
| 1 | 3.053558000  | 16.232269000 | 2.034107000  |
| 1 | 1.415705000  | 16.707462000 | 1.551987000  |
| 1 | 2.810188000  | 17.312486000 | 0.642523000  |
| 6 | 1.670782000  | 14.032173000 | 1.003322000  |
| 1 | 2.273633000  | 13.754240000 | 1.874979000  |
| 1 | 1.575584000  | 13.150261000 | 0.357020000  |
| 1 | 0.668294000  | 14.302834000 | 1.356073000  |
| 6 | 8.858082000  | 12.536753000 | 4.954397000  |
| 1 | 9.293862000  | 12.854014000 | 5.909194000  |
| 1 | 9.680735000  | 12.446537000 | 4.242707000  |
| 6 | 8.199340000  | 11.114539000 | 5.030351000  |
| 6 | 7.408490000  | 10.840290000 | 6.330233000  |
| 6 | 6.380828000  | 9.879423000  | 6.287610000  |
| 1 | 6.142281000  | 9.424299000  | 5.333963000  |
| 6 | 5.676092000  | 9.523429000  | 7.441702000  |
| 1 | 4.892206000  | 8.774529000  | 7.383939000  |
| 6 | 5.979347000  | 10.128120000 | 8.670100000  |
| 1 | 5.432231000  | 9.854229000  | 9.566666000  |
| 6 | 6.996204000  | 11.085491000 | 8.727361000  |
| 1 | 7.243530000  | 11.562823000 | 9.670812000  |
| 6 | 7.707019000  | 11.434319000 | 7.568838000  |
| 1 | 8.497639000  | 12.171731000 | 7.654812000  |
| 6 | 9.367304000  | 10.093748000 | 4.927706000  |
| 6 | 10.232987000 | 9.839427000  | 6.006593000  |
| 1 | 10.056456000 | 10.309916000 | 6.968039000  |
| 6 | 11.319305000 | 8.966633000  | 5.862614000  |
| 1 | 11.975284000 | 8.781999000  | 6.708102000  |
| 6 | 11.556868000 | 8.331021000  | 4.637687000  |
| 1 | 12.397287000 | 7.652830000  | 4.526916000  |
| 6 | 10.698034000 | 8.576356000  | 3.558524000  |
| 1 | 10.870047000 | 8.088095000  | 2.603725000  |
| 6 | 9.613530000  | 9.451510000  | 3.702983000  |
| 1 | 8.939999000  | 9.647031000  | 2.877965000  |
| 7 | 3.228284000  | 12.028867000 | 4.067821000  |
| 1 | 3.806370000  | 11.750609000 | 3.278749000  |
| 7 | 5.124160000  | 13.189334000 | 4.787695000  |
| 7 | 7.941249000  | 13.591420000 | 4.416941000  |
| 7 | 6.595780000  | 14.512053000 | 2.084216000  |
| 7 | 4.686560000  | 14.387879000 | 0.735989000  |

|    |              |              |              |
|----|--------------|--------------|--------------|
| 1  | 4.687467000  | 13.399750000 | 0.980032000  |
| 8  | 7.344695000  | 10.983227000 | 3.894938000  |
| 6  | 7.561220000  | 4.716839000  | 1.545582000  |
| 6  | 7.927695000  | 6.011759000  | 0.840810000  |
| 6  | 9.162704000  | 6.158333000  | 0.185463000  |
| 6  | 9.519254000  | 7.371692000  | -0.418999000 |
| 6  | 8.626270000  | 8.434658000  | -0.358448000 |
| 6  | 7.393839000  | 8.333737000  | 0.286700000  |
| 6  | 7.054296000  | 7.118111000  | 0.882990000  |
| 1  | 6.715595000  | 9.178091000  | 0.336866000  |
| 17 | 9.084819000  | 10.022173000 | -1.150216000 |
| 1  | 10.472839000 | 7.473208000  | -0.921716000 |
| 1  | 9.864819000  | 5.336215000  | 0.146958000  |
| 1  | 6.094050000  | 7.027221000  | 1.376192000  |
| 6  | 8.434176000  | 3.528114000  | 1.173657000  |
| 6  | 8.462670000  | 3.039993000  | -0.148337000 |
| 1  | 7.808635000  | 3.472609000  | -0.895139000 |
| 6  | 9.307189000  | 1.990319000  | -0.512211000 |
| 1  | 9.314374000  | 1.616909000  | -1.528415000 |
| 6  | 10.136787000 | 1.432111000  | 0.459775000  |
| 17 | 11.246460000 | 0.053423000  | -0.009419000 |
| 6  | 10.146854000 | 1.890919000  | 1.771070000  |
| 1  | 10.802373000 | 1.448527000  | 2.510454000  |
| 6  | 9.289223000  | 2.941839000  | 2.123143000  |
| 1  | 9.305672000  | 3.304222000  | 3.142575000  |
| 6  | 7.301625000  | 4.855599000  | 3.036842000  |
| 6  | 7.750830000  | 5.979031000  | 3.751544000  |
| 6  | 7.556417000  | 6.079934000  | 5.136413000  |
| 1  | 7.903797000  | 6.953985000  | 5.672805000  |
| 1  | 8.268983000  | 6.783599000  | 3.247571000  |
| 6  | 6.659953000  | 3.819564000  | 3.746423000  |
| 1  | 6.301272000  | 2.946137000  | 3.215681000  |
| 6  | 6.456576000  | 3.906972000  | 5.123694000  |
| 1  | 5.954225000  | 3.110267000  | 5.657687000  |
| 6  | 6.908566000  | 5.043100000  | 5.795310000  |
| 17 | 6.638002000  | 5.166356000  | 7.602377000  |

Data for 1F:

<sup>5</sup>Re<sub>1F</sub>:

|    |             |              |              |
|----|-------------|--------------|--------------|
| 26 | 6.777498000 | 12.474344000 | 4.161191000  |
| 8  | 5.579254000 | 11.027270000 | 3.651209000  |
| 1  | 5.942244000 | 10.129721000 | 3.536298000  |
| 6  | 3.562938000 | 8.937285000  | 6.198259000  |
| 1  | 4.545614000 | 9.400831000  | 6.054672000  |
| 1  | 3.257872000 | 8.483299000  | 5.246566000  |
| 1  | 3.671452000 | 8.133248000  | 6.936110000  |
| 6  | 1.140188000 | 9.290865000  | 6.820368000  |
| 1  | 1.188739000 | 8.475710000  | 7.551872000  |
| 1  | 0.806560000 | 8.867278000  | 5.864648000  |
| 1  | 0.379423000 | 10.004921000 | 7.160689000  |
| 6  | 2.953839000 | 10.557761000 | 8.038198000  |
| 1  | 3.914172000 | 11.078401000 | 7.955815000  |
| 1  | 3.065796000 | 9.756038000  | 8.778280000  |
| 1  | 2.210207000 | 11.267594000 | 8.421182000  |
| 6  | 2.520164000 | 9.973626000  | 6.676254000  |
| 6  | 2.372980000 | 11.103788000 | 5.609981000  |
| 1  | 2.030115000 | 10.641394000 | 4.675222000  |
| 1  | 1.583420000 | 11.794683000 | 5.922164000  |
| 6  | 3.932175000 | 13.079244000 | 5.764331000  |
| 6  | 3.104087000 | 13.842388000 | 6.631642000  |
| 1  | 2.153681000 | 13.448026000 | 6.961090000  |
| 6  | 3.533108000 | 15.084121000 | 7.069172000  |
| 1  | 2.905522000 | 15.666931000 | 7.735324000  |
| 6  | 4.781537000 | 15.577381000 | 6.665424000  |
| 1  | 5.148634000 | 16.535272000 | 7.013786000  |
| 6  | 5.553573000 | 14.799740000 | 5.804196000  |
| 6  | 6.878170000 | 15.362514000 | 5.330114000  |
| 1  | 6.663028000 | 16.168612000 | 4.618741000  |
| 1  | 7.390441000 | 15.827248000 | 6.179820000  |
| 6  | 8.237878000 | 14.906297000 | 3.326055000  |
| 1  | 8.982883000 | 14.201583000 | 2.949286000  |
| 1  | 8.693044000 | 15.901031000 | 3.408761000  |
| 6  | 7.071117000 | 14.923673000 | 2.368918000  |
| 6  | 6.866582000 | 15.959013000 | 1.464705000  |
| 1  | 7.523457000 | 16.819610000 | 1.455606000  |
| 6  | 5.779695000 | 15.854225000 | 0.576109000  |
| 1  | 5.572437000 | 16.655978000 | -0.124718000 |
| 6  | 4.968257000 | 14.732795000 | 0.594551000  |
| 1  | 4.126991000 | 14.654357000 | -0.079635000 |
| 6  | 5.243128000 | 13.682774000 | 1.519239000  |
| 6  | 3.506137000 | 12.181408000 | 0.565421000  |
| 1  | 3.803045000 | 12.567774000 | -0.418394000 |
| 1  | 2.555903000 | 12.670764000 | 0.831808000  |
| 6  | 3.255626000 | 10.656025000 | 0.414293000  |
| 6  | 2.202869000 | 10.480373000 | -0.706715000 |
| 1  | 1.978042000 | 9.417708000  | -0.853160000 |
| 1  | 2.566863000 | 10.884083000 | -1.659509000 |
| 1  | 1.266077000 | 10.992114000 | -0.453358000 |
| 6  | 2.699908000 | 10.051728000 | 1.724789000  |
| 1  | 3.427052000 | 10.117927000 | 2.540321000  |
| 1  | 2.456812000 | 8.992483000  | 1.577498000  |
| 1  | 1.782961000 | 10.569389000 | 2.033406000  |
| 6  | 4.560842000 | 9.932644000  | 0.009901000  |
| 1  | 5.326623000 | 10.021326000 | 0.787880000  |
| 1  | 4.968893000 | 10.349791000 | -0.919272000 |
| 1  | 4.368709000 | 8.865571000  | -0.153745000 |
| 6  | 8.948165000 | 13.927438000 | 5.496150000  |
| 1  | 9.424703000 | 14.772784000 | 6.006048000  |
| 1  | 9.668539000 | 13.501885000 | 4.799035000  |
| 6  | 8.540091000 | 12.788293000 | 6.494490000  |
| 6  | 7.953902000 | 13.320502000 | 7.815580000  |
| 6  | 6.865532000 | 12.655110000 | 8.403920000  |
| 1  | 6.439361000 | 11.807777000 | 7.882010000  |
| 6  | 6.336074000 | 13.083115000 | 9.626473000  |
| 1  | 5.493270000 | 12.554557000 | 10.061650000 |
| 6  | 6.886026000 | 14.189675000 | 10.286079000 |
| 1  | 6.473973000 | 14.525070000 | 11.232633000 |
| 6  | 7.975686000 | 14.856904000 | 9.714763000  |
| 1  | 8.416809000 | 15.711722000 | 10.218208000 |
| 6  | 8.507470000 | 14.422947000 | 8.493018000  |
| 1  | 9.366810000 | 14.945771000 | 8.085558000  |

|    |              |              |              |
|----|--------------|--------------|--------------|
| 6  | 9.787833000  | 11.897272000 | 6.734795000  |
| 6  | 10.459075000 | 11.808369000 | 7.963210000  |
| 1  | 10.116783000 | 12.385259000 | 8.813879000  |
| 6  | 11.575937000 | 10.971482000 | 8.108736000  |
| 1  | 12.081374000 | 10.916040000 | 9.068209000  |
| 6  | 12.033779000 | 10.210468000 | 7.029294000  |
| 1  | 12.897293000 | 9.562366000  | 7.143002000  |
| 6  | 11.366629000 | 10.291204000 | 5.797963000  |
| 1  | 11.712582000 | 9.702339000  | 4.953509000  |
| 6  | 10.254214000 | 11.124059000 | 5.650730000  |
| 1  | 9.731606000  | 11.187040000 | 4.700325000  |
| 7  | 3.597882000  | 11.842646000 | 5.308610000  |
| 1  | 4.283800000  | 11.392089000 | 4.681395000  |
| 7  | 5.144875000  | 13.590788000 | 5.340017000  |
| 7  | 7.794697000  | 14.393676000 | 4.661300000  |
| 7  | 6.265221000  | 13.828018000 | 2.427121000  |
| 7  | 4.549027000  | 12.516758000 | 1.539238000  |
| 1  | 4.831204000  | 11.830960000 | 2.255889000  |
| 8  | 7.554223000  | 11.978365000 | 5.820540000  |
| 6  | 11.854923000 | 11.287870000 | -0.613434000 |
| 6  | 13.164535000 | 10.871626000 | -1.129314000 |
| 6  | 13.805119000 | 11.583704000 | -2.176584000 |
| 6  | 15.049164000 | 11.191316000 | -2.672703000 |
| 6  | 15.672142000 | 10.075815000 | -2.115518000 |
| 6  | 15.087718000 | 9.343333000  | -1.083576000 |
| 6  | 13.840652000 | 9.741657000  | -0.599936000 |
| 1  | 15.595032000 | 8.486638000  | -0.657169000 |
| 17 | 17.308463000 | 9.557080000  | -2.758943000 |
| 1  | 15.515988000 | 11.739013000 | -3.482127000 |
| 1  | 13.311037000 | 12.439475000 | -2.621274000 |
| 1  | 13.393311000 | 9.185125000  | 0.215014000  |
| 6  | 11.519239000 | 12.713117000 | -0.545083000 |
| 6  | 12.513951000 | 13.692689000 | -0.285404000 |
| 1  | 13.537703000 | 13.382593000 | -0.113032000 |
| 6  | 12.202120000 | 15.050900000 | -0.213702000 |
| 1  | 12.972808000 | 15.781391000 | -0.000497000 |
| 6  | 10.879749000 | 15.446336000 | -0.407684000 |
| 17 | 10.464058000 | 17.230660000 | -0.316766000 |
| 6  | 9.864984000  | 14.526710000 | -0.668541000 |
| 1  | 8.845167000  | 14.856180000 | -0.823691000 |
| 6  | 10.188591000 | 13.170594000 | -0.733780000 |
| 1  | 9.404611000  | 12.456931000 | -0.956914000 |
| 6  | 10.890559000 | 10.279754000 | -0.163431000 |
| 6  | 10.826616000 | 8.997869000  | -0.772791000 |
| 6  | 9.914599000  | 8.031420000  | -0.346672000 |
| 1  | 9.871640000  | 7.064074000  | -0.832109000 |
| 1  | 11.482588000 | 8.766327000  | -1.603643000 |
| 6  | 9.985448000  | 10.542298000 | 0.897220000  |
| 1  | 9.988113000  | 11.493382000 | 1.413352000  |
| 6  | 9.072178000  | 9.582077000  | 1.335688000  |
| 1  | 8.413558000  | 9.830354000  | 2.157356000  |
| 6  | 9.053148000  | 8.340868000  | 0.705579000  |
| 17 | 7.856143000  | 7.069857000  | 1.274353000  |
| 9  | 8.329128000  | 11.941629000 | 3.126194000  |

<sup>5</sup>TS<sub>OH,1F</sub>;

|    |             |              |             |
|----|-------------|--------------|-------------|
| 26 | 6.912249000 | 11.893126000 | 3.137491000 |
| 8  | 6.370903000 | 9.886243000  | 2.990935000 |
| 1  | 6.943304000 | 9.618919000  | 3.747603000 |
| 6  | 4.582785000 | 8.184937000  | 6.194453000 |
| 1  | 5.417886000 | 8.871937000  | 6.015216000 |
| 1  | 4.580215000 | 7.431308000  | 5.397846000 |
| 1  | 4.767489000 | 7.671213000  | 7.145551000 |
| 6  | 2.084507000 | 7.944259000  | 6.477432000 |
| 1  | 2.221865000 | 7.413071000  | 7.426567000 |
| 1  | 2.042308000 | 7.196777000  | 5.675627000 |
| 1  | 1.115855000 | 8.458694000  | 6.516076000 |
| 6  | 3.272363000 | 9.965134000  | 7.408263000 |
| 1  | 4.070539000 | 10.702718000 | 7.272685000 |
| 1  | 3.452399000 | 9.446227000  | 8.358118000 |
| 1  | 2.320265000 | 10.502428000 | 7.495380000 |
| 6  | 3.239899000 | 8.947270000  | 6.247019000 |
| 6  | 2.969107000 | 9.650549000  | 4.877628000 |
| 1  | 2.898193000 | 8.871325000  | 4.113111000 |
| 1  | 1.990733000 | 10.141245000 | 4.913151000 |

|   |              |              |              |
|---|--------------|--------------|--------------|
| 6 | 4.002341000  | 11.940473000 | 4.701223000  |
| 6 | 2.898829000  | 12.628425000 | 5.270377000  |
| 1 | 1.977721000  | 12.104655000 | 5.481717000  |
| 6 | 3.017551000  | 13.978646000 | 5.560450000  |
| 1 | 2.175205000  | 14.513852000 | 5.986228000  |
| 6 | 4.229318000  | 14.643651000 | 5.324403000  |
| 1 | 4.360148000  | 15.686334000 | 5.588636000  |
| 6 | 5.280827000  | 13.924408000 | 4.757710000  |
| 6 | 6.641041000  | 14.590105000 | 4.649941000  |
| 1 | 6.512135000  | 15.622858000 | 4.301898000  |
| 1 | 7.044722000  | 14.653093000 | 5.666183000  |
| 6 | 7.898361000  | 14.596971000 | 2.510549000  |
| 1 | 8.634739000  | 13.989000000 | 1.978912000  |
| 1 | 8.307422000  | 15.601003000 | 2.691118000  |
| 6 | 6.656507000  | 14.691279000 | 1.664196000  |
| 6 | 6.360109000  | 15.866528000 | 0.976489000  |
| 1 | 7.004866000  | 16.731253000 | 1.073871000  |
| 6 | 5.214037000  | 15.897397000 | 0.169887000  |
| 1 | 4.956633000  | 16.794085000 | -0.383696000 |
| 6 | 4.397307000  | 14.780887000 | 0.093315000  |
| 1 | 3.503209000  | 14.800150000 | -0.512811000 |
| 6 | 4.742941000  | 13.614844000 | 0.829543000  |
| 6 | 2.667346000  | 12.484511000 | 0.070395000  |
| 1 | 2.853653000  | 12.732878000 | -0.983963000 |
| 1 | 2.003246000  | 13.264308000 | 0.474227000  |
| 6 | 1.917143000  | 11.129943000 | 0.115072000  |
| 6 | 0.596359000  | 11.321152000 | -0.669127000 |
| 1 | 0.024488000  | 10.386393000 | -0.682156000 |
| 1 | 0.792210000  | 11.612600000 | -1.708103000 |
| 1 | -0.029098000 | 12.094791000 | -0.207421000 |
| 6 | 1.582612000  | 10.735029000 | 1.571085000  |
| 1 | 2.480853000  | 10.586320000 | 2.180359000  |
| 1 | 1.011028000  | 9.799431000  | 1.587173000  |
| 1 | 0.976406000  | 11.510852000 | 2.054888000  |
| 6 | 2.755714000  | 10.029198000 | -0.570694000 |
| 1 | 3.727904000  | 9.890363000  | -0.087494000 |
| 1 | 2.943452000  | 10.282753000 | -1.620890000 |
| 1 | 2.225300000  | 9.070098000  | -0.543208000 |
| 6 | 8.917494000  | 13.555086000 | 4.490621000  |
| 1 | 9.276446000  | 14.414056000 | 5.072729000  |
| 1 | 9.639679000  | 13.362792000 | 3.699438000  |
| 6 | 8.827947000  | 12.252249000 | 5.368316000  |
| 6 | 8.280240000  | 12.545986000 | 6.782900000  |
| 6 | 7.308243000  | 11.697336000 | 7.335943000  |
| 1 | 6.953210000  | 10.874000000 | 6.729692000  |
| 6 | 6.805210000  | 11.916318000 | 8.624343000  |
| 1 | 6.054064000  | 11.244850000 | 9.029924000  |
| 6 | 7.264802000  | 12.996346000 | 9.388077000  |
| 1 | 6.873735000  | 13.170215000 | 10.385762000 |
| 6 | 8.237869000  | 13.849103000 | 8.852302000  |
| 1 | 8.608090000  | 14.687478000 | 9.434763000  |
| 6 | 8.742666000  | 13.623001000 | 7.564865000  |
| 1 | 9.511032000  | 14.287453000 | 7.181704000  |
| 6 | 10.263874000 | 11.656755000 | 5.419684000  |
| 6 | 11.027642000 | 11.529922000 | 6.589709000  |
| 1 | 10.625457000 | 11.858606000 | 7.540445000  |
| 6 | 12.318862000 | 10.980481000 | 6.549009000  |
| 1 | 12.892090000 | 10.892005000 | 7.467318000  |
| 6 | 12.865133000 | 10.550924000 | 5.336776000  |
| 1 | 13.865036000 | 10.129366000 | 5.303797000  |
| 6 | 12.105158000 | 10.663160000 | 4.162530000  |
| 1 | 12.515471000 | 10.321766000 | 3.216957000  |
| 6 | 10.817219000 | 11.202430000 | 4.203309000  |
| 1 | 10.219275000 | 11.276803000 | 3.298885000  |
| 7 | 3.988903000  | 10.601324000 | 4.427845000  |
| 1 | 4.812952000  | 10.226683000 | 3.939939000  |
| 7 | 5.159794000  | 12.619246000 | 4.399298000  |
| 7 | 7.635063000  | 13.886237000 | 3.797423000  |
| 7 | 5.878079000  | 13.574273000 | 1.594597000  |
| 7 | 3.942628000  | 12.506176000 | 0.798541000  |
| 1 | 4.210696000  | 11.721156000 | 1.373116000  |
| 8 | 7.979401000  | 11.313537000 | 4.695181000  |
| 6 | 6.848498000  | 8.157442000  | 1.804402000  |
| 6 | 8.223505000  | 7.920313000  | 2.310331000  |
| 6 | 9.339579000  | 7.923544000  | 1.442702000  |

|    |              |              |              |
|----|--------------|--------------|--------------|
| 6  | 10.618691000 | 7.596780000  | 1.900091000  |
| 6  | 10.789552000 | 7.271522000  | 3.242886000  |
| 6  | 9.726446000  | 7.283073000  | 4.143826000  |
| 6  | 8.453032000  | 7.604939000  | 3.673144000  |
| 1  | 9.881670000  | 7.041301000  | 5.187775000  |
| 17 | 12.452327000 | 6.791394000  | 3.836673000  |
| 1  | 11.457369000 | 7.580350000  | 1.215274000  |
| 1  | 9.207400000  | 8.148514000  | 0.392586000  |
| 1  | 7.625738000  | 7.592824000  | 4.374021000  |
| 6  | 6.692789000  | 8.697916000  | 0.423749000  |
| 6  | 7.301319000  | 9.911467000  | 0.033097000  |
| 1  | 7.834176000  | 10.524445000 | 0.758567000  |
| 6  | 7.203036000  | 10.365797000 | -1.286900000 |
| 1  | 7.662122000  | 11.304051000 | -1.574839000 |
| 6  | 6.509172000  | 9.599002000  | -2.218834000 |
| 17 | 6.386883000  | 10.194199000 | -3.951323000 |
| 6  | 5.906226000  | 8.391590000  | -1.878730000 |
| 1  | 5.382645000  | 7.801772000  | -2.620764000 |
| 6  | 5.997427000  | 7.950505000  | -0.555283000 |
| 1  | 5.543094000  | 7.002705000  | -0.294814000 |
| 6  | 5.776098000  | 7.231498000  | 2.264937000  |
| 6  | 6.060891000  | 5.935960000  | 2.750673000  |
| 6  | 5.037854000  | 5.040663000  | 3.082501000  |
| 1  | 5.275166000  | 4.047477000  | 3.442746000  |
| 1  | 7.086001000  | 5.601569000  | 2.842498000  |
| 6  | 4.418530000  | 7.594370000  | 2.119206000  |
| 1  | 4.174567000  | 8.583837000  | 1.757373000  |
| 6  | 3.387057000  | 6.710797000  | 2.439984000  |
| 1  | 2.351620000  | 7.004008000  | 2.318156000  |
| 6  | 3.716510000  | 5.443964000  | 2.920917000  |
| 17 | 2.369665000  | 4.276159000  | 3.340706000  |
| 9  | 8.449327000  | 11.854281000 | 1.877570000  |

<sup>5</sup>P<sub>OH,1F</sub>:

|    |              |              |             |
|----|--------------|--------------|-------------|
| 26 | 6.244822000  | 11.837980000 | 2.898775000 |
| 8  | 7.063791000  | 8.341031000  | 3.223503000 |
| 1  | 7.571169000  | 9.216764000  | 3.158649000 |
| 6  | 2.970658000  | 8.174359000  | 5.128322000 |
| 1  | 4.011103000  | 8.504946000  | 5.035404000 |
| 1  | 2.629556000  | 7.836931000  | 4.141901000 |
| 1  | 2.948436000  | 7.311844000  | 5.805195000 |
| 6  | 0.608423000  | 8.807802000  | 5.757535000 |
| 1  | 0.538929000  | 7.949924000  | 6.436568000 |
| 1  | 0.234502000  | 8.491388000  | 4.775618000 |
| 1  | -0.055964000 | 9.594003000  | 6.138163000 |
| 6  | 2.558102000  | 9.737459000  | 7.064716000 |
| 1  | 3.581087000  | 10.127937000 | 7.026615000 |
| 1  | 2.552244000  | 8.878784000  | 7.747257000 |
| 1  | 1.909551000  | 10.510261000 | 7.495128000 |
| 6  | 2.069231000  | 9.307550000  | 5.664401000 |
| 6  | 2.084568000  | 10.508085000 | 4.667657000 |
| 1  | 1.703752000  | 10.151981000 | 3.702786000 |
| 1  | 1.384368000  | 11.275944000 | 5.014864000 |
| 6  | 3.888544000  | 12.232811000 | 5.005600000 |
| 6  | 3.171257000  | 12.995487000 | 5.967162000 |
| 1  | 2.188612000  | 12.683477000 | 6.289306000 |
| 6  | 3.742173000  | 14.146638000 | 6.484647000 |
| 1  | 3.192023000  | 14.739417000 | 7.207836000 |
| 6  | 5.028256000  | 14.544106000 | 6.081794000 |
| 1  | 5.496125000  | 15.433367000 | 6.486237000 |
| 6  | 5.702546000  | 13.749978000 | 5.159249000 |
| 6  | 7.148452000  | 14.044897000 | 4.817859000 |
| 1  | 7.337471000  | 15.122947000 | 4.914315000 |
| 1  | 7.768022000  | 13.546239000 | 5.568399000 |
| 6  | 7.405082000  | 14.588142000 | 2.413642000 |
| 1  | 8.073604000  | 14.324957000 | 1.586601000 |
| 1  | 7.710046000  | 15.580716000 | 2.773297000 |
| 6  | 6.002447000  | 14.658864000 | 1.850878000 |
| 6  | 5.452686000  | 15.881563000 | 1.482526000 |
| 1  | 5.980728000  | 16.803981000 | 1.690370000 |
| 6  | 4.206662000  | 15.882986000 | 0.829958000 |
| 1  | 3.745447000  | 16.821096000 | 0.539740000 |
| 6  | 3.564585000  | 14.687715000 | 0.557936000 |
| 1  | 2.602566000  | 14.680024000 | 0.064940000 |
| 6  | 4.169612000  | 13.461221000 | 0.956993000 |

|    |             |             |             |
|----|-------------|-------------|-------------|
| 6  | 2.37888000  | 12.08081000 | -0.08162800 |
| 1  | 2.41358100  | 12.74707900 | -0.95408700 |
| 1  | 1.49782900  | 12.37245700 | 0.51294200  |
| 6  | 2.17261700  | 10.63052000 | -0.59723100 |
| 6  | 0.87552200  | 10.62966000 | -1.44097300 |
| 1  | 0.67084200  | 9.62269500  | -1.82208100 |
| 1  | 0.96196000  | 11.30632800 | -2.30010000 |
| 1  | 0.01295500  | 10.94607000 | -0.84137900 |
| 6  | 2.01128900  | 9.64212200  | 0.58223900  |
| 1  | 2.91683100  | 9.58930400  | 1.19512100  |
| 1  | 1.80361400  | 8.63427400  | 0.20244300  |
| 1  | 1.17200400  | 9.93801600  | 1.22478900  |
| 6  | 3.36193300  | 10.20046000 | -1.48639300 |
| 1  | 4.29774600  | 10.17355800 | -0.91825500 |
| 1  | 3.49210400  | 10.89274400 | -2.32752400 |
| 1  | 3.18725800  | 9.19831600  | -1.89553300 |
| 6  | 8.97397600  | 12.98746800 | 3.47774300  |
| 1  | 9.65624100  | 13.59917700 | 4.08177600  |
| 1  | 9.32619500  | 13.02974400 | 2.44659900  |
| 6  | 9.02581100  | 11.47338800 | 3.89733600  |
| 6  | 8.98520800  | 11.26273200 | 5.42771000  |
| 6  | 8.23578600  | 10.20185300 | 5.96571900  |
| 1  | 7.68152200  | 9.55553000  | 5.29742700  |
| 6  | 8.20484700  | 9.97014900  | 7.34672300  |
| 1  | 7.61979000  | 9.14276100  | 7.73693000  |
| 6  | 8.92096600  | 10.79504300 | 8.22201200  |
| 1  | 8.89335500  | 10.61683000 | 9.29229200  |
| 6  | 9.67784500  | 11.85067800 | 7.70068800  |
| 1  | 10.24349500 | 12.49705400 | 8.36469200  |
| 6  | 9.71175100  | 12.07881400 | 6.31882200  |
| 1  | 10.31774200 | 12.89791200 | 5.94480100  |
| 6  | 10.33675000 | 10.90827000 | 3.28082300  |
| 6  | 11.51331800 | 10.68870700 | 4.01444000  |
| 1  | 11.53082600 | 10.86573700 | 5.08272000  |
| 6  | 12.67919000 | 10.23027800 | 3.38285700  |
| 1  | 13.57668900 | 10.06693700 | 3.97176500  |
| 6  | 12.68913500 | 9.98525100  | 2.00603800  |
| 1  | 13.59236700 | 9.63337400  | 1.51756000  |
| 6  | 11.51890400 | 10.19850200 | 1.26309300  |
| 1  | 11.50927200 | 10.00613400 | 0.19461000  |
| 6  | 10.35758800 | 10.65257000 | 1.89569400  |
| 1  | 9.44794400  | 10.79246100 | 1.32425600  |
| 7  | 3.39595400  | 11.10802100 | 4.41420600  |
| 1  | 3.94867300  | 10.71588800 | 3.64434500  |
| 7  | 5.14726600  | 12.63146200 | 4.61766200  |
| 7  | 7.58961500  | 13.55891800 | 3.47806800  |
| 7  | 5.37518900  | 13.47022200 | 1.62362700  |
| 7  | 3.60795700  | 12.25307600 | 0.69555000  |
| 1  | 4.05309500  | 11.43934500 | 1.13716000  |
| 8  | 7.89445800  | 10.83587100 | 3.27496900  |
| 6  | 7.60003900  | 7.24101100  | 2.44130300  |
| 6  | 8.76601900  | 6.64173100  | 3.25489700  |
| 6  | 10.08598200 | 7.09583500  | 3.09444300  |
| 6  | 11.11746300 | 6.64546100  | 3.92876700  |
| 6  | 10.81078400 | 5.74021700  | 4.93812200  |
| 6  | 9.51323500  | 5.28309800  | 5.14944600  |
| 6  | 8.49753700  | 5.74476300  | 4.30559400  |
| 1  | 9.29199000  | 4.58840700  | 5.95036300  |
| 17 | 12.15670800 | 5.13639300  | 6.03429500  |
| 1  | 12.12870500 | 7.00664900  | 3.79074900  |
| 1  | 10.32754400 | 7.81738700  | 2.32457000  |
| 1  | 7.48480400  | 5.39999200  | 4.47580700  |
| 6  | 7.98174000  | 7.71388100  | 1.01863600  |
| 6  | 7.29954500  | 8.81013300  | 0.46138100  |
| 1  | 6.54854600  | 9.33247700  | 1.04488400  |
| 6  | 7.55679900  | 9.22116900  | -0.85243500 |
| 1  | 7.02991300  | 10.06726400 | -1.27718700 |
| 6  | 8.49353800  | 8.51759500  | -1.60403400 |
| 17 | 8.83882300  | 9.05518600  | -3.32827000 |
| 6  | 9.16906300  | 7.41303800  | -1.09559200 |
| 1  | 9.88486300  | 6.87110600  | -1.70135600 |
| 6  | 8.90088800  | 7.01325500  | 0.21997300  |
| 1  | 9.42304400  | 6.14877100  | 0.61319700  |
| 6  | 6.43210800  | 6.24897000  | 2.24419900  |
| 6  | 6.65691900  | 4.90762000  | 1.89280000  |



|    |             |              |             |
|----|-------------|--------------|-------------|
| 6  | 5.588078000 | 4.040797000  | 1.636006000 |
| 1  | 5.767693000 | 3.006001000  | 1.371588000 |
| 1  | 7.667805000 | 4.522011000  | 1.820854000 |
| 6  | 5.112236000 | 6.719409000  | 2.320039000 |
| 1  | 4.944914000 | 7.760612000  | 2.565514000 |
| 6  | 4.031990000 | 5.866070000  | 2.061230000 |
| 1  | 3.014057000 | 6.232445000  | 2.116362000 |
| 6  | 4.292310000 | 4.540575000  | 1.727917000 |
| 17 | 2.879644000 | 3.411600000  | 1.392118000 |
| 9  | 4.937601000 | 10.460365000 | 2.195776000 |

<sup>5</sup>TS<sub>F,1F</sub>:

|    |             |              |              |
|----|-------------|--------------|--------------|
| 26 | 7.183179000 | 12.576202000 | 3.533222000  |
| 8  | 6.237020000 | 10.868840000 | 3.106815000  |
| 1  | 6.718078000 | 10.023597000 | 3.066068000  |
| 6  | 5.414619000 | 8.421813000  | 5.975806000  |
| 1  | 6.199524000 | 9.132670000  | 5.694248000  |
| 1  | 5.082979000 | 7.900397000  | 5.068500000  |
| 1  | 5.855021000 | 7.678449000  | 6.651228000  |
| 6  | 3.135812000 | 8.112683000  | 7.018478000  |
| 1  | 3.530540000 | 7.351216000  | 7.701645000  |
| 1  | 2.766519000 | 7.600948000  | 6.120491000  |
| 1  | 2.282027000 | 8.596665000  | 7.509726000  |
| 6  | 4.725244000 | 9.841254000  | 7.947853000  |
| 1  | 5.468267000 | 10.611836000 | 7.716309000  |
| 1  | 5.190285000 | 9.113025000  | 8.623764000  |
| 1  | 3.894544000 | 10.315708000 | 8.485127000  |
| 6  | 4.232311000 | 9.143293000  | 6.661996000  |
| 6  | 3.602891000 | 10.177275000 | 5.676727000  |
| 1  | 3.228300000 | 9.622794000  | 4.806541000  |
| 1  | 2.729586000 | 10.639201000 | 6.149489000  |
| 6  | 4.580032000 | 12.498767000 | 5.610674000  |
| 6  | 3.750179000 | 13.033452000 | 6.632999000  |
| 1  | 3.019792000 | 12.407983000 | 7.126385000  |
| 6  | 3.900174000 | 14.359964000 | 7.006484000  |
| 1  | 3.272022000 | 14.773183000 | 7.789159000  |
| 6  | 4.870858000 | 15.158793000 | 6.386613000  |
| 1  | 5.021988000 | 16.191286000 | 6.678592000  |
| 6  | 5.657093000 | 14.586587000 | 5.385440000  |
| 6  | 6.665902000 | 15.462549000 | 4.671026000  |
| 1  | 6.113345000 | 16.093932000 | 3.964513000  |
| 1  | 7.124911000 | 16.141184000 | 5.400500000  |
| 6  | 7.859596000 | 15.302950000 | 2.527857000  |
| 1  | 8.713226000 | 14.800138000 | 2.068525000  |
| 1  | 8.048344000 | 16.385622000 | 2.542432000  |
| 6  | 6.626728000 | 14.994337000 | 1.709788000  |
| 6  | 6.083459000 | 15.926902000 | 0.829863000  |
| 1  | 6.508390000 | 16.920116000 | 0.751585000  |
| 6  | 4.968284000 | 15.543415000 | 0.063716000  |
| 1  | 4.506760000 | 16.250898000 | -0.617460000 |
| 6  | 4.451024000 | 14.263519000 | 0.179790000  |
| 1  | 3.588794000 | 13.965920000 | -0.400660000 |
| 6  | 5.060685000 | 13.340893000 | 1.080213000  |
| 6  | 3.592507000 | 11.487243000 | 0.350242000  |
| 1  | 3.775350000 | 11.777105000 | -0.695189000 |
| 1  | 2.612678000 | 11.906298000 | 0.630498000  |
| 6  | 3.496483000 | 9.939652000  | 0.402015000  |
| 6  | 2.378339000 | 9.522550000  | -0.583375000 |
| 1  | 2.257310000 | 8.433157000  | -0.581982000 |
| 1  | 2.615850000 | 9.835929000  | -1.607522000 |
| 1  | 1.416491000 | 9.969876000  | -0.303005000 |
| 6  | 3.125784000 | 9.457686000  | 1.823246000  |
| 1  | 3.915232000 | 9.698652000  | 2.541360000  |
| 1  | 2.983191000 | 8.370105000  | 1.828092000  |
| 1  | 2.192299000 | 9.923579000  | 2.163197000  |
| 6  | 4.831994000 | 9.297564000  | -0.038976000 |
| 1  | 5.643775000 | 9.557506000  | 0.648173000  |
| 1  | 5.114552000 | 9.630525000  | -1.044987000 |
| 1  | 4.740273000 | 8.204731000  | -0.056542000 |
| 6  | 9.042228000 | 14.649252000 | 4.606586000  |
| 1  | 9.295633000 | 15.605186000 | 5.083513000  |
| 1  | 9.787192000 | 14.454751000 | 3.834934000  |
| 6  | 9.106771000 | 13.443412000 | 5.606370000  |
| 6  | 8.517319000 | 13.754311000 | 7.007727000  |
| 6  | 7.844832000 | 12.731049000 | 7.696898000  |

|    |              |              |              |
|----|--------------|--------------|--------------|
| 1  | 7.699947000  | 11.785737000 | 7.189325000  |
| 6  | 7.364121000  | 12.930086000 | 8.995438000  |
| 1  | 6.847817000  | 12.123305000 | 9.507469000  |
| 6  | 7.542992000  | 14.164534000 | 9.633673000  |
| 1  | 7.168726000  | 14.322248000 | 10.640450000 |
| 6  | 8.211771000  | 15.192361000 | 8.959409000  |
| 1  | 8.358823000  | 16.154605000 | 9.440965000  |
| 6  | 8.699010000  | 14.986796000 | 7.661378000  |
| 1  | 9.223499000  | 15.801382000 | 7.173109000  |
| 6  | 10.601819000 | 13.068549000 | 5.808733000  |
| 6  | 11.572023000 | 14.027818000 | 6.155513000  |
| 1  | 11.290916000 | 15.065793000 | 6.299466000  |
| 6  | 12.912316000 | 13.660863000 | 6.331762000  |
| 1  | 13.645658000 | 14.416495000 | 6.597294000  |
| 6  | 13.305119000 | 12.325247000 | 6.173152000  |
| 1  | 14.343099000 | 12.040039000 | 6.313530000  |
| 6  | 12.345901000 | 11.363651000 | 5.833566000  |
| 1  | 12.637994000 | 10.325366000 | 5.706970000  |
| 6  | 11.007226000 | 11.733976000 | 5.649535000  |
| 1  | 10.257441000 | 11.003137000 | 5.374520000  |
| 7  | 4.512669000  | 11.208167000 | 5.183359000  |
| 1  | 5.147852000  | 10.961589000 | 4.399826000  |
| 7  | 5.515224000  | 13.299903000 | 4.985990000  |
| 7  | 7.727424000  | 14.748299000 | 3.907278000  |
| 7  | 6.120528000  | 13.740921000 | 1.858187000  |
| 7  | 4.647397000  | 12.051670000 | 1.196520000  |
| 1  | 5.170566000  | 11.456905000 | 1.864271000  |
| 8  | 8.417050000  | 12.351772000 | 5.007015000  |
| 6  | 10.043277000 | 11.678384000 | 0.778675000  |
| 6  | 10.374957000 | 10.442311000 | 1.520038000  |
| 6  | 11.709401000 | 10.090091000 | 1.818237000  |
| 6  | 12.011890000 | 8.898941000  | 2.485173000  |
| 6  | 10.967666000 | 8.058251000  | 2.859525000  |
| 6  | 9.634953000  | 8.365485000  | 2.584607000  |
| 6  | 9.347975000  | 9.554543000  | 1.914501000  |
| 1  | 8.839441000  | 7.697326000  | 2.890639000  |
| 17 | 11.354250000 | 6.497931000  | 3.736053000  |
| 1  | 13.040195000 | 8.634440000  | 2.697266000  |
| 1  | 12.522917000 | 10.733815000 | 1.508193000  |
| 1  | 8.319377000  | 9.822698000  | 1.712774000  |
| 6  | 11.009729000 | 12.797920000 | 0.811957000  |
| 6  | 11.588155000 | 13.198184000 | 2.039042000  |
| 1  | 11.287293000 | 12.705383000 | 2.954371000  |
| 6  | 12.519140000 | 14.235403000 | 2.096426000  |
| 1  | 12.945467000 | 14.536445000 | 3.045250000  |
| 6  | 12.877529000 | 14.878437000 | 0.911540000  |
| 17 | 14.099504000 | 16.241146000 | 0.977527000  |
| 6  | 12.337353000 | 14.515770000 | -0.318914000 |
| 1  | 12.638788000 | 15.021460000 | -1.227694000 |
| 6  | 11.401819000 | 13.477046000 | -0.362239000 |
| 1  | 10.995515000 | 13.182340000 | -1.321656000 |
| 6  | 9.132392000  | 11.571317000 | -0.385154000 |
| 6  | 9.016624000  | 10.369958000 | -1.117707000 |
| 6  | 8.196321000  | 10.287333000 | -2.247498000 |
| 1  | 8.126121000  | 9.364515000  | -2.809538000 |
| 1  | 9.587203000  | 9.497988000  | -0.822876000 |
| 6  | 8.388507000  | 12.692415000 | -0.818458000 |
| 1  | 8.439430000  | 13.613392000 | -0.254490000 |
| 6  | 7.561524000  | 12.621577000 | -1.939638000 |
| 1  | 6.983511000  | 13.482110000 | -2.252159000 |
| 6  | 7.481701000  | 11.416338000 | -2.636950000 |
| 17 | 6.400153000  | 11.317246000 | -4.112940000 |
| 9  | 8.718064000  | 12.485864000 | 2.081551000  |

<sup>5</sup>P<sub>F,1F</sub>:

|    |             |              |             |
|----|-------------|--------------|-------------|
| 26 | 7.176066000 | 12.467457000 | 3.590569000 |
| 8  | 6.406433000 | 10.647948000 | 3.176454000 |
| 1  | 6.943966000 | 9.842129000  | 3.280727000 |
| 6  | 5.342196000 | 8.487174000  | 6.133968000 |
| 1  | 6.159353000 | 9.143301000  | 5.813719000 |
| 1  | 5.000050000 | 7.918258000  | 5.259836000 |
| 1  | 5.743596000 | 7.775173000  | 6.865223000 |
| 6  | 3.029230000 | 8.348670000  | 7.139835000 |
| 1  | 3.371446000 | 7.609598000  | 7.873836000 |
| 1  | 2.651662000 | 7.805179000  | 6.264395000 |

|   |              |              |              |
|---|--------------|--------------|--------------|
| 1 | 2.192162000  | 8.902529000  | 7.583851000  |
| 6 | 4.681798000  | 10.051417000 | 8.004690000  |
| 1 | 5.475280000  | 10.761913000 | 7.749213000  |
| 1 | 5.084722000  | 9.341911000  | 8.737912000  |
| 1 | 3.866866000  | 10.605711000 | 8.486849000  |
| 6 | 4.182544000  | 9.302394000  | 6.750398000  |
| 6 | 3.624180000  | 10.305240000 | 5.693266000  |
| 1 | 3.257667000  | 9.722480000  | 4.837723000  |
| 1 | 2.755161000  | 10.823706000 | 6.112072000  |
| 6 | 4.677178000  | 12.588822000 | 5.540722000  |
| 6 | 3.851675000  | 13.207323000 | 6.517687000  |
| 1 | 3.099730000  | 12.635013000 | 7.042035000  |
| 6 | 4.038272000  | 14.550403000 | 6.809334000  |
| 1 | 3.416425000  | 15.026379000 | 7.560719000  |
| 6 | 5.030888000  | 15.290980000 | 6.148674000  |
| 1 | 5.197032000  | 16.337332000 | 6.375324000  |
| 6 | 5.808619000  | 14.642375000 | 5.190128000  |
| 6 | 6.835227000  | 15.438827000 | 4.400840000  |
| 1 | 6.287334000  | 16.015941000 | 3.644855000  |
| 1 | 7.305978000  | 16.170684000 | 5.069174000  |
| 6 | 8.012502000  | 15.051475000 | 2.266301000  |
| 1 | 8.900356000  | 14.547746000 | 1.872248000  |
| 1 | 8.165566000  | 16.136087000 | 2.167386000  |
| 6 | 6.828454000  | 14.617774000 | 1.434412000  |
| 6 | 6.283484000  | 15.454917000 | 0.465522000  |
| 1 | 6.655183000  | 16.464721000 | 0.341965000  |
| 6 | 5.241539000  | 14.953010000 | -0.336033000 |
| 1 | 4.782004000  | 15.584092000 | -1.089775000 |
| 6 | 4.797725000  | 13.653273000 | -0.163190000 |
| 1 | 3.993843000  | 13.262174000 | -0.771250000 |
| 6 | 5.400088000  | 12.831862000 | 0.836260000  |
| 6 | 4.064238000  | 10.852264000 | 0.181708000  |
| 1 | 4.279391000  | 11.072190000 | -0.874301000 |
| 1 | 3.049604000  | 11.231511000 | 0.386351000  |
| 6 | 4.055694000  | 9.309569000  | 0.352611000  |
| 6 | 3.020648000  | 8.747185000  | -0.651216000 |
| 1 | 2.968226000  | 7.655198000  | -0.571719000 |
| 1 | 3.292258000  | 8.998748000  | -1.683975000 |
| 1 | 2.019075000  | 9.148924000  | -0.453218000 |
| 6 | 3.635314000  | 8.915972000  | 1.788166000  |
| 1 | 4.363293000  | 9.268167000  | 2.525815000  |
| 1 | 3.563292000  | 7.824668000  | 1.874796000  |
| 1 | 2.653690000  | 9.339875000  | 2.035687000  |
| 6 | 5.449854000  | 8.722347000  | 0.031655000  |
| 1 | 6.205940000  | 9.083408000  | 0.736646000  |
| 1 | 5.767187000  | 8.996787000  | -0.982290000 |
| 1 | 5.423973000  | 7.627614000  | 0.093578000  |
| 6 | 9.208422000  | 14.586701000 | 4.377771000  |
| 1 | 9.450534000  | 15.555802000 | 4.833526000  |
| 1 | 9.950825000  | 14.396958000 | 3.600026000  |
| 6 | 9.334348000  | 13.395224000 | 5.389103000  |
| 6 | 8.747131000  | 13.700355000 | 6.792336000  |
| 6 | 8.164576000  | 12.647336000 | 7.519577000  |
| 1 | 8.094305000  | 11.677106000 | 7.043744000  |
| 6 | 7.677223000  | 12.845727000 | 8.815615000  |
| 1 | 7.232622000  | 12.015151000 | 9.356110000  |
| 6 | 7.759975000  | 14.109124000 | 9.416349000  |
| 1 | 7.380549000  | 14.266023000 | 10.421324000 |
| 6 | 8.339951000  | 15.165996000 | 8.706665000  |
| 1 | 8.411649000  | 16.151208000 | 9.158015000  |
| 6 | 8.831290000  | 14.961978000 | 7.409476000  |
| 1 | 9.278184000  | 15.803974000 | 6.891581000  |
| 6 | 10.851403000 | 13.096714000 | 5.557449000  |
| 6 | 11.761918000 | 14.071692000 | 6.005570000  |
| 1 | 11.413984000 | 15.062197000 | 6.279417000  |
| 6 | 13.127061000 | 13.780510000 | 6.117569000  |
| 1 | 13.813540000 | 14.547622000 | 6.463509000  |
| 6 | 13.606357000 | 12.504696000 | 5.791254000  |
| 1 | 14.663762000 | 12.276914000 | 5.884278000  |
| 6 | 12.706281000 | 11.525625000 | 5.351707000  |
| 1 | 13.064727000 | 10.531256000 | 5.101475000  |
| 6 | 11.341833000 | 11.822100000 | 5.232461000  |
| 1 | 10.632355000 | 11.080259000 | 4.888144000  |
| 7 | 4.587189000  | 11.278353000 | 5.180067000  |
| 1 | 5.242091000  | 10.953265000 | 4.442944000  |

|    |              |              |              |
|----|--------------|--------------|--------------|
| 7  | 5.636846000  | 13.331834000 | 4.888088000  |
| 7  | 7.880355000  | 14.643335000 | 3.695318000  |
| 7  | 6.389722000  | 13.346691000 | 1.644900000  |
| 7  | 5.047060000  | 11.535563000 | 1.025887000  |
| 1  | 5.529870000  | 11.031196000 | 1.799572000  |
| 8  | 8.686790000  | 12.273289000 | 4.805658000  |
| 6  | 10.699750000 | 11.709481000 | 0.200931000  |
| 6  | 10.821713000 | 10.273253000 | 0.704347000  |
| 6  | 12.004744000 | 9.540513000  | 0.524250000  |
| 6  | 12.093555000 | 8.207518000  | 0.945428000  |
| 6  | 10.985693000 | 7.627882000  | 1.553990000  |
| 6  | 9.797853000  | 8.328043000  | 1.752977000  |
| 6  | 9.719155000  | 9.655810000  | 1.320498000  |
| 1  | 8.950715000  | 7.852730000  | 2.231713000  |
| 17 | 11.092068000 | 5.886228000  | 2.115025000  |
| 1  | 13.008017000 | 7.645485000  | 0.803385000  |
| 1  | 12.867016000 | 10.000642000 | 0.056479000  |
| 1  | 8.799835000  | 10.207747000 | 1.477635000  |
| 6  | 12.019992000 | 12.474021000 | 0.232391000  |
| 6  | 12.596000000 | 12.765527000 | 1.482704000  |
| 1  | 12.100229000 | 12.455092000 | 2.395146000  |
| 6  | 13.807121000 | 13.456275000 | 1.567669000  |
| 1  | 14.244622000 | 13.680426000 | 2.532504000  |
| 6  | 14.436718000 | 13.844158000 | 0.385856000  |
| 17 | 16.028417000 | 14.747758000 | 0.486989000  |
| 6  | 13.899162000 | 13.567465000 | -0.866207000 |
| 1  | 14.407631000 | 13.877992000 | -1.770239000 |
| 6  | 12.679205000 | 12.880286000 | -0.935936000 |
| 1  | 12.253603000 | 12.665297000 | -1.908451000 |
| 6  | 9.943605000  | 11.821543000 | -1.121159000 |
| 6  | 9.959640000  | 10.784919000 | -2.066616000 |
| 6  | 9.282646000  | 10.916723000 | -3.286017000 |
| 1  | 9.299222000  | 10.114670000 | -4.013111000 |
| 1  | 10.496375000 | 9.866176000  | -1.863224000 |
| 6  | 9.233511000  | 12.999555000 | -1.411447000 |
| 1  | 9.208432000  | 13.808202000 | -0.692523000 |
| 6  | 8.544202000  | 13.140962000 | -2.619407000 |
| 1  | 7.989443000  | 14.045641000 | -2.833827000 |
| 6  | 8.584739000  | 12.093360000 | -3.536671000 |
| 17 | 7.686561000  | 12.271460000 | -5.124489000 |
| 9  | 9.840854000  | 12.405616000 | 1.201495000  |

Data for the reaction of diphenylmethyl with 1<sub>Cl</sub> and 1<sub>Br</sub>:

<sup>5</sup>Re<sub>1Cl,PP</sub>:

|    |              |              |              |
|----|--------------|--------------|--------------|
| 26 | 6.076384000  | 12.471705000 | 3.096475000  |
| 8  | 4.650683000  | 11.160922000 | 2.938457000  |
| 1  | 4.892416000  | 10.304477000 | 2.537447000  |
| 6  | 3.715617000  | 8.804860000  | 5.879306000  |
| 1  | 4.602687000  | 9.248284000  | 5.413218000  |
| 1  | 3.026906000  | 8.501108000  | 5.080482000  |
| 1  | 4.030594000  | 7.901712000  | 6.415500000  |
| 6  | 1.784180000  | 9.133822000  | 7.471680000  |
| 1  | 2.065599000  | 8.234664000  | 8.032055000  |
| 1  | 1.066422000  | 8.837274000  | 6.696418000  |
| 1  | 1.275875000  | 9.817562000  | 8.163262000  |
| 6  | 4.021114000  | 10.196900000 | 7.966602000  |
| 1  | 4.894480000  | 10.713744000 | 7.554946000  |
| 1  | 4.374406000  | 9.306245000  | 8.500513000  |
| 1  | 3.544127000  | 10.860079000 | 8.699001000  |
| 6  | 3.034551000  | 9.797597000  | 6.848718000  |
| 6  | 2.549471000  | 11.054947000 | 6.063140000  |
| 1  | 1.816221000  | 10.723682000 | 5.317124000  |
| 1  | 2.016925000  | 11.725997000 | 6.744396000  |
| 6  | 4.174498000  | 12.957357000 | 5.733973000  |
| 6  | 3.842055000  | 13.632974000 | 6.940441000  |
| 1  | 3.093605000  | 13.221716000 | 7.601916000  |
| 6  | 4.502252000  | 14.801850000 | 7.275348000  |
| 1  | 4.254574000  | 15.314111000 | 8.198967000  |
| 6  | 5.501847000  | 15.312774000 | 6.433160000  |
| 1  | 6.049066000  | 16.211330000 | 6.689695000  |
| 6  | 5.786797000  | 14.628745000 | 5.255485000  |
| 6  | 6.806824000  | 15.216200000 | 4.303243000  |
| 1  | 6.306960000  | 16.004131000 | 3.728575000  |
| 1  | 7.600621000  | 15.704567000 | 4.880113000  |
| 6  | 7.467213000  | 14.889329000 | 1.960286000  |
| 1  | 8.051638000  | 14.225630000 | 1.316779000  |
| 1  | 7.967686000  | 15.865546000 | 1.992073000  |
| 6  | 6.082902000  | 15.018231000 | 1.377468000  |
| 6  | 5.757320000  | 16.064299000 | 0.523326000  |
| 1  | 6.474339000  | 16.850497000 | 0.323583000  |
| 6  | 4.487457000  | 16.056693000 | -0.079894000 |
| 1  | 4.202073000  | 16.853701000 | -0.758074000 |
| 6  | 3.601106000  | 15.027369000 | 0.182145000  |
| 1  | 2.632415000  | 15.005874000 | -0.295752000 |
| 6  | 3.973702000  | 13.985944000 | 1.081047000  |
| 6  | 1.841138000  | 12.785585000 | 0.712915000  |
| 1  | 1.979506000  | 12.594596000 | -0.363589000 |
| 1  | 1.279059000  | 13.724787000 | 0.803391000  |
| 6  | 0.965272000  | 11.653743000 | 1.308617000  |
| 6  | -0.345805000 | 11.618659000 | 0.486157000  |
| 1  | -1.017538000 | 10.845798000 | 0.876849000  |
| 1  | -0.145540000 | 11.391820000 | -0.568200000 |
| 1  | -0.870719000 | 12.580606000 | 0.536528000  |
| 6  | 0.631380000  | 11.961901000 | 2.785491000  |
| 1  | 1.539349000  | 12.053677000 | 3.389710000  |
| 1  | 0.013307000  | 11.162915000 | 3.212425000  |
| 1  | 0.072785000  | 12.902717000 | 2.869187000  |
| 6  | 1.668475000  | 10.280956000 | 1.190058000  |
| 1  | 2.572508000  | 10.230953000 | 1.805006000  |
| 1  | 1.947015000  | 10.072814000 | 0.149427000  |
| 1  | 0.993196000  | 9.484196000  | 1.524428000  |
| 6  | 8.735522000  | 13.686085000 | 3.713652000  |
| 1  | 9.379113000  | 14.463982000 | 4.138754000  |
| 1  | 9.201537000  | 13.330676000 | 2.793809000  |
| 6  | 8.584533000  | 12.445178000 | 4.650497000  |
| 6  | 8.459213000  | 12.782389000 | 6.154990000  |
| 6  | 7.691871000  | 11.939390000 | 6.977381000  |
| 1  | 7.149696000  | 11.120636000 | 6.520583000  |
| 6  | 7.620695000  | 12.154348000 | 8.357595000  |
| 1  | 7.021853000  | 11.491063000 | 8.974112000  |
| 6  | 8.317033000  | 13.219125000 | 8.944302000  |
| 1  | 8.261925000  | 13.387054000 | 10.015139000 |
| 6  | 9.087868000  | 14.061464000 | 8.136266000  |
| 1  | 9.635705000  | 14.888790000 | 8.576711000  |
| 6  | 9.161558000  | 13.842467000 | 6.754085000  |
| 1  | 9.779505000  | 14.507029000 | 6.160238000  |

|    |              |              |              |
|----|--------------|--------------|--------------|
| 6  | 9.818192000  | 11.527154000 | 4.469603000  |
| 6  | 11.123929000 | 12.035841000 | 4.591587000  |
| 1  | 11.287448000 | 13.084680000 | 4.817177000  |
| 6  | 12.233776000 | 11.196796000 | 4.434473000  |
| 1  | 13.234376000 | 11.606776000 | 4.530825000  |
| 6  | 12.054632000 | 9.834299000  | 4.160850000  |
| 1  | 12.914736000 | 9.182928000  | 4.042719000  |
| 6  | 10.757380000 | 9.321163000  | 4.044727000  |
| 1  | 10.606498000 | 8.266926000  | 3.833410000  |
| 6  | 9.647303000  | 10.161669000 | 4.196572000  |
| 1  | 8.641951000  | 9.772232000  | 4.098563000  |
| 7  | 3.593529000  | 11.791052000 | 5.347399000  |
| 1  | 3.915075000  | 11.401453000 | 4.446496000  |
| 7  | 5.131672000  | 13.493007000 | 4.892821000  |
| 7  | 7.411480000  | 14.265471000 | 3.318208000  |
| 7  | 5.213095000  | 14.013108000 | 1.680019000  |
| 7  | 3.147384000  | 12.945863000 | 1.364106000  |
| 1  | 3.545187000  | 12.182854000 | 1.928473000  |
| 8  | 7.406511000  | 11.748529000 | 4.211353000  |
| 6  | 12.175156000 | 12.977528000 | -0.370745000 |
| 6  | 13.610946000 | 12.871122000 | -0.574463000 |
| 6  | 14.305320000 | 13.638620000 | -1.554917000 |
| 6  | 15.675506000 | 13.486966000 | -1.761707000 |
| 6  | 16.415069000 | 12.564512000 | -1.005555000 |
| 6  | 15.754198000 | 11.784699000 | -0.045298000 |
| 6  | 14.382429000 | 11.926051000 | 0.162662000  |
| 1  | 16.312141000 | 11.063774000 | 0.544729000  |
| 1  | 16.168805000 | 14.081090000 | -2.525105000 |
| 1  | 13.751299000 | 14.331237000 | -2.177277000 |
| 1  | 13.901507000 | 11.314836000 | 0.917321000  |
| 6  | 11.409889000 | 14.166411000 | -0.743908000 |
| 6  | 11.972451000 | 15.472194000 | -0.681412000 |
| 1  | 12.993995000 | 15.592693000 | -0.339737000 |
| 6  | 11.224256000 | 16.604466000 | -1.005732000 |
| 1  | 11.682495000 | 17.586175000 | -0.932878000 |
| 6  | 9.886628000  | 16.483271000 | -1.409437000 |
| 6  | 9.305950000  | 15.208242000 | -1.473530000 |
| 1  | 8.272263000  | 15.097808000 | -1.786710000 |
| 6  | 10.047011000 | 14.072828000 | -1.140802000 |
| 1  | 9.574207000  | 13.100145000 | -1.214259000 |
| 17 | 7.237647000  | 11.562093000 | 0.910711000  |
| 1  | 17.481820000 | 12.449977000 | -1.167984000 |
| 1  | 9.307652000  | 17.364579000 | -1.665869000 |
| 6  | 11.465536000 | 11.825310000 | 0.303561000  |
| 1  | 11.734619000 | 10.859688000 | -0.142869000 |
| 1  | 11.736916000 | 11.765215000 | 1.369243000  |
| 1  | 10.379719000 | 11.926114000 | 0.268925000  |

<sup>5</sup>TS<sub>Cl,1Cl,PP:</sub>

|    |             |              |             |
|----|-------------|--------------|-------------|
| 26 | 6.930347000 | 13.242786000 | 3.673199000 |
| 8  | 5.583819000 | 12.027623000 | 2.822644000 |
| 1  | 5.916077000 | 11.322342000 | 2.237888000 |
| 6  | 4.285528000 | 8.918569000  | 4.637865000 |
| 1  | 5.210489000 | 9.480132000  | 4.465375000 |
| 1  | 3.721443000 | 8.895937000  | 3.696469000 |
| 1  | 4.554661000 | 7.886965000  | 4.895569000 |
| 6  | 2.127967000 | 8.769327000  | 5.941358000 |
| 1  | 2.335539000 | 7.723145000  | 6.195620000 |
| 1  | 1.535815000 | 8.780755000  | 5.017470000 |
| 1  | 1.513823000 | 9.196448000  | 6.744424000 |
| 6  | 4.245163000 | 9.529302000  | 7.089192000 |
| 1  | 5.168783000 | 10.112162000 | 7.003182000 |
| 1  | 4.517034000 | 8.498815000  | 7.349196000 |
| 1  | 3.656120000 | 9.941196000  | 7.918088000 |
| 6  | 3.446750000 | 9.557896000  | 5.768059000 |
| 6  | 3.071329000 | 11.022496000 | 5.381022000 |
| 1  | 2.482741000 | 10.984309000 | 4.454536000 |
| 1  | 2.413123000 | 11.440300000 | 6.150065000 |
| 6  | 4.655510000 | 12.880034000 | 5.995571000 |
| 6  | 4.105259000 | 13.118434000 | 7.284398000 |
| 1  | 3.282467000 | 12.518974000 | 7.647477000 |
| 6  | 4.650439000 | 14.111203000 | 8.083888000 |
| 1  | 4.237892000 | 14.292536000 | 9.071288000 |
| 6  | 5.740015000 | 14.865939000 | 7.626944000 |
| 1  | 6.194760000 | 15.631167000 | 8.244721000 |

|   |              |              |              |
|---|--------------|--------------|--------------|
| 6 | 6.237749000  | 14.600785000 | 6.350329000  |
| 6 | 7.370446000  | 15.461628000 | 5.822429000  |
| 1 | 6.941061000  | 16.432575000 | 5.545884000  |
| 1 | 8.075363000  | 15.656481000 | 6.640275000  |
| 6 | 8.206320000  | 15.974230000 | 3.569339000  |
| 1 | 8.875555000  | 15.580592000 | 2.798004000  |
| 1 | 8.635190000  | 16.910271000 | 3.955614000  |
| 6 | 6.860108000  | 16.237371000 | 2.936045000  |
| 6 | 6.466810000  | 17.522445000 | 2.571100000  |
| 1 | 7.098343000  | 18.373671000 | 2.794296000  |
| 6 | 5.233198000  | 17.676120000 | 1.914709000  |
| 1 | 4.886245000  | 18.664902000 | 1.632455000  |
| 6 | 4.453976000  | 16.566870000 | 1.628778000  |
| 1 | 3.500580000  | 16.679439000 | 1.131104000  |
| 6 | 4.913502000  | 15.271985000 | 2.008547000  |
| 6 | 3.024178000  | 14.127420000 | 0.885410000  |
| 1 | 3.165904000  | 14.805546000 | 0.031297000  |
| 1 | 2.163799000  | 14.511658000 | 1.457615000  |
| 6 | 2.654739000  | 12.729001000 | 0.321152000  |
| 6 | 1.410333000  | 12.917727000 | -0.579311000 |
| 1 | 1.094971000  | 11.955873000 | -1.000097000 |
| 1 | 1.623353000  | 13.598289000 | -1.413147000 |
| 1 | 0.568293000  | 13.329319000 | -0.008741000 |
| 6 | 2.308711000  | 11.745616000 | 1.463619000  |
| 1 | 3.176595000  | 11.558312000 | 2.103691000  |
| 1 | 1.979467000  | 10.785232000 | 1.047866000  |
| 1 | 1.495225000  | 12.140984000 | 2.085270000  |
| 6 | 3.818475000  | 12.163678000 | -0.525972000 |
| 1 | 4.713576000  | 12.002053000 | 0.083489000  |
| 1 | 4.081026000  | 12.849718000 | -1.340803000 |
| 1 | 3.532106000  | 11.202703000 | -0.970515000 |
| 6 | 9.424753000  | 14.307964000 | 4.941364000  |
| 1 | 9.987166000  | 14.927862000 | 5.652459000  |
| 1 | 9.979234000  | 14.284483000 | 4.001715000  |
| 6 | 9.291047000  | 12.819499000 | 5.414753000  |
| 6 | 8.997920000  | 12.673092000 | 6.933475000  |
| 6 | 8.124996000  | 11.657307000 | 7.357613000  |
| 1 | 7.638532000  | 11.057234000 | 6.599123000  |
| 6 | 7.882060000  | 11.435292000 | 8.717594000  |
| 1 | 7.203535000  | 10.643051000 | 9.020583000  |
| 6 | 8.506103000  | 12.232386000 | 9.686042000  |
| 1 | 8.316720000  | 12.064523000 | 10.741810000 |
| 6 | 9.379537000  | 13.247136000 | 9.277556000  |
| 1 | 9.872218000  | 13.872178000 | 10.016584000 |
| 6 | 9.627083000  | 13.460696000 | 7.914727000  |
| 1 | 10.320284000 | 14.246166000 | 7.632621000  |
| 6 | 10.639952000 | 12.098450000 | 5.137448000  |
| 6 | 11.880111000 | 12.657265000 | 5.497502000  |
| 1 | 11.927790000 | 13.628133000 | 5.979917000  |
| 6 | 13.076068000 | 11.973282000 | 5.244824000  |
| 1 | 14.022595000 | 12.424277000 | 5.527731000  |
| 6 | 13.053329000 | 10.712518000 | 4.634526000  |
| 1 | 13.979515000 | 10.178006000 | 4.446808000  |
| 6 | 11.822682000 | 10.146831000 | 4.275042000  |
| 1 | 11.791671000 | 9.168658000  | 3.803759000  |
| 6 | 10.628851000 | 10.836872000 | 4.521153000  |
| 1 | 9.671239000  | 10.418988000 | 4.236872000  |
| 7 | 4.201783000  | 11.917906000 | 5.146316000  |
| 1 | 4.685238000  | 11.844456000 | 4.228822000  |
| 7 | 5.707856000  | 13.650519000 | 5.543067000  |
| 7 | 8.105151000  | 14.935552000 | 4.635413000  |
| 7 | 6.098829000  | 15.137851000 | 2.693519000  |
| 7 | 4.235322000  | 14.134132000 | 1.707694000  |
| 1 | 4.654216000  | 13.245250000 | 2.046805000  |
| 8 | 8.257425000  | 12.213702000 | 4.650256000  |
| 6 | 9.444734000  | 11.706519000 | -0.757866000 |
| 6 | 10.876786000 | 11.994980000 | -0.618589000 |
| 6 | 11.637644000 | 12.458184000 | -1.723375000 |
| 6 | 13.017565000 | 12.643731000 | -1.616589000 |
| 6 | 13.673215000 | 12.383799000 | -0.407475000 |
| 6 | 12.938012000 | 11.924071000 | 0.696770000  |
| 6 | 11.564283000 | 11.723197000 | 0.592304000  |
| 1 | 13.434738000 | 11.729699000 | 1.641277000  |
| 1 | 13.580015000 | 12.982504000 | -2.480070000 |
| 1 | 11.152525000 | 12.626269000 | -2.676587000 |

|    |              |              |              |
|----|--------------|--------------|--------------|
| 1  | 11.006634000 | 11.411380000 | 1.466721000  |
| 6  | 8.643827000  | 12.369392000 | -1.783699000 |
| 6  | 8.882063000  | 13.721925000 | -2.144496000 |
| 1  | 9.640865000  | 14.284428000 | -1.614774000 |
| 6  | 8.113195000  | 14.348512000 | -3.122019000 |
| 1  | 8.301798000  | 15.387317000 | -3.370405000 |
| 6  | 7.088538000  | 13.644687000 | -3.773460000 |
| 6  | 6.832379000  | 12.310837000 | -3.427524000 |
| 1  | 6.043437000  | 11.761079000 | -3.929322000 |
| 6  | 7.589484000  | 11.682643000 | -2.438089000 |
| 1  | 7.381526000  | 10.648212000 | -2.193613000 |
| 17 | 8.524211000  | 13.200063000 | 1.359306000  |
| 1  | 14.744406000 | 12.534442000 | -0.324258000 |
| 1  | 6.492300000  | 14.133544000 | -4.536606000 |
| 6  | 8.932200000  | 10.427045000 | -0.152205000 |
| 1  | 9.150481000  | 9.595258000  | -0.841281000 |
| 1  | 9.433443000  | 10.196982000 | 0.787366000  |
| 1  | 7.856996000  | 10.455795000 | 0.023311000  |

<sup>5</sup>P<sub>Cl,1Cl,PP</sub>:

|    |              |              |              |
|----|--------------|--------------|--------------|
| 26 | 6.193170000  | 13.077634000 | 3.221835000  |
| 8  | 4.609903000  | 12.152467000 | 2.412669000  |
| 1  | 4.648894000  | 11.251661000 | 2.038407000  |
| 6  | 2.810486000  | 9.460682000  | 4.605166000  |
| 1  | 3.839602000  | 9.761012000  | 4.379623000  |
| 1  | 2.221632000  | 9.548603000  | 3.683345000  |
| 1  | 2.821014000  | 8.404500000  | 4.900463000  |
| 6  | 0.748474000  | 9.902938000  | 5.994868000  |
| 1  | 0.706335000  | 8.852050000  | 6.304532000  |
| 1  | 0.134772000  | 10.013921000 | 5.091936000  |
| 1  | 0.295718000  | 10.507887000 | 6.790882000  |
| 6  | 3.041317000  | 10.160177000 | 7.020575000  |
| 1  | 4.075386000  | 10.490170000 | 6.873347000  |
| 1  | 3.062802000  | 9.105010000  | 7.320573000  |
| 1  | 2.611598000  | 10.734843000 | 7.850675000  |
| 6  | 2.210503000  | 10.332591000 | 5.730795000  |
| 6  | 2.182937000  | 11.826273000 | 5.280449000  |
| 1  | 1.546173000  | 11.894936000 | 4.388732000  |
| 1  | 1.698225000  | 12.429030000 | 6.056383000  |
| 6  | 4.218145000  | 13.240899000 | 5.715879000  |
| 6  | 3.855793000  | 13.614732000 | 7.038108000  |
| 1  | 2.956649000  | 13.221674000 | 7.490403000  |
| 6  | 4.680331000  | 14.470396000 | 7.752155000  |
| 1  | 4.412194000  | 14.752040000 | 8.765353000  |
| 6  | 5.860704000  | 14.962913000 | 7.174997000  |
| 1  | 6.520919000  | 15.625557000 | 7.721840000  |
| 6  | 6.167850000  | 14.578052000 | 5.870479000  |
| 6  | 7.387610000  | 15.179234000 | 5.193744000  |
| 1  | 7.124501000  | 16.205822000 | 4.907588000  |
| 1  | 8.196959000  | 15.262444000 | 5.930120000  |
| 6  | 8.071265000  | 15.428089000 | 2.839395000  |
| 1  | 8.590524000  | 14.880106000 | 2.046266000  |
| 1  | 8.711151000  | 16.274650000 | 3.129009000  |
| 6  | 6.765075000  | 15.940736000 | 2.279482000  |
| 6  | 6.614641000  | 17.275944000 | 1.918834000  |
| 1  | 7.413350000  | 17.985363000 | 2.097726000  |
| 6  | 5.403733000  | 17.669869000 | 1.320878000  |
| 1  | 5.247580000  | 18.705942000 | 1.038602000  |
| 6  | 4.407002000  | 16.737140000 | 1.093072000  |
| 1  | 3.471574000  | 17.033844000 | 0.639443000  |
| 6  | 4.614649000  | 15.377772000 | 1.474740000  |
| 6  | 2.438800000  | 14.667376000 | 0.537318000  |
| 1  | 2.650635000  | 15.242963000 | -0.376043000 |
| 1  | 1.769714000  | 15.287467000 | 1.156263000  |
| 6  | 1.673190000  | 13.383338000 | 0.121350000  |
| 6  | 0.417427000  | 13.836812000 | -0.661168000 |
| 1  | -0.170770000 | 12.966004000 | -0.973046000 |
| 1  | 0.692779000  | 14.399224000 | -1.562018000 |
| 1  | -0.225698000 | 14.475237000 | -0.042435000 |
| 6  | 1.231680000  | 12.578571000 | 1.366300000  |
| 1  | 2.096155000  | 12.216184000 | 1.931560000  |
| 1  | 0.635085000  | 11.709508000 | 1.063000000  |
| 1  | 0.614520000  | 13.196966000 | 2.030706000  |
| 6  | 2.555047000  | 12.501370000 | -0.792366000 |
| 1  | 3.446756000  | 12.147824000 | -0.265247000 |



|    |              |              |              |
|----|--------------|--------------|--------------|
| 1  | 2.878382000  | 13.059154000 | -1.680342000 |
| 1  | 1.992129000  | 11.623000000 | -1.130455000 |
| 6  | 9.068359000  | 13.599537000 | 4.175775000  |
| 1  | 9.730141000  | 14.011054000 | 4.948768000  |
| 1  | 9.627903000  | 13.608061000 | 3.238262000  |
| 6  | 8.705609000  | 12.093708000 | 4.435553000  |
| 6  | 8.360438000  | 11.770353000 | 5.908183000  |
| 6  | 7.473607000  | 10.709169000 | 6.167919000  |
| 1  | 7.022852000  | 10.200394000 | 5.324837000  |
| 6  | 7.169314000  | 10.323475000 | 7.477164000  |
| 1  | 6.484463000  | 9.498515000  | 7.649818000  |
| 6  | 7.745369000  | 10.995569000 | 8.564357000  |
| 1  | 7.509335000  | 10.698833000 | 9.581561000  |
| 6  | 8.629282000  | 12.051695000 | 8.323047000  |
| 1  | 9.084487000  | 12.582624000 | 9.153854000  |
| 6  | 8.935253000  | 12.432484000 | 7.007876000  |
| 1  | 9.633501000  | 13.249002000 | 6.858427000  |
| 6  | 9.955521000  | 11.272521000 | 4.004271000  |
| 6  | 11.059103000 | 11.062352000 | 4.849323000  |
| 1  | 11.040232000 | 11.427964000 | 5.869989000  |
| 6  | 12.187309000 | 10.364529000 | 4.396642000  |
| 1  | 13.026984000 | 10.209689000 | 5.067889000  |
| 6  | 12.232002000 | 9.864240000  | 3.090113000  |
| 1  | 13.104311000 | 9.320061000  | 2.741169000  |
| 6  | 11.138147000 | 10.070779000 | 2.239096000  |
| 1  | 11.158508000 | 9.686808000  | 1.223136000  |
| 6  | 10.013654000 | 10.769946000 | 2.692749000  |
| 1  | 9.159678000  | 10.928825000 | 2.046866000  |
| 7  | 3.478728000  | 12.408771000 | 4.932342000  |
| 1  | 3.834732000  | 12.236717000 | 3.971847000  |
| 7  | 5.375078000  | 13.741731000 | 5.154872000  |
| 7  | 7.875159000  | 14.477614000 | 3.973879000  |
| 7  | 5.790491000  | 15.009237000 | 2.092203000  |
| 7  | 3.694893000  | 14.407629000 | 1.245003000  |
| 1  | 3.927294000  | 13.453075000 | 1.595237000  |
| 8  | 7.603911000  | 11.777771000 | 3.584930000  |
| 6  | 6.541489000  | 8.349449000  | 0.555372000  |
| 6  | 7.177668000  | 9.325281000  | -0.422652000 |
| 6  | 8.082419000  | 8.857554000  | -1.394933000 |
| 6  | 8.766775000  | 9.753655000  | -2.226553000 |
| 6  | 8.555223000  | 11.130008000 | -2.106600000 |
| 6  | 7.659018000  | 11.606803000 | -1.139922000 |
| 6  | 6.983303000  | 10.716041000 | -0.302373000 |
| 1  | 7.483240000  | 12.673034000 | -1.038803000 |
| 1  | 9.460736000  | 9.369782000  | -2.967227000 |
| 1  | 8.264359000  | 7.795117000  | -1.498627000 |
| 1  | 6.286383000  | 11.103961000 | 0.430816000  |
| 6  | 6.409667000  | 6.926824000  | 0.060584000  |
| 6  | 5.811585000  | 6.663417000  | -1.189825000 |
| 1  | 5.429862000  | 7.488257000  | -1.781308000 |
| 6  | 5.689122000  | 5.357067000  | -1.663972000 |
| 1  | 5.220596000  | 5.175543000  | -2.625639000 |
| 6  | 6.166631000  | 4.282308000  | -0.899342000 |
| 6  | 6.762660000  | 4.529631000  | 0.340482000  |
| 1  | 7.137021000  | 3.706394000  | 0.939992000  |
| 6  | 6.879866000  | 5.840941000  | 0.819863000  |
| 1  | 7.347969000  | 6.005379000  | 1.782164000  |
| 1  | 9.078914000  | 11.823717000 | -2.756141000 |
| 1  | 6.072437000  | 3.266105000  | -1.267921000 |
| 6  | 7.091808000  | 8.516423000  | 1.968801000  |
| 1  | 8.144284000  | 8.205665000  | 1.975171000  |
| 1  | 7.064082000  | 9.560523000  | 2.287052000  |
| 1  | 6.540390000  | 7.909843000  | 2.690518000  |
| 17 | 4.578739000  | 8.953195000  | 0.771309000  |

<sup>5</sup>TS<sub>OH,1Cl,PP:</sub>

|    |             |              |             |
|----|-------------|--------------|-------------|
| 26 | 8.417022000 | 13.106293000 | 3.740167000 |
| 8  | 7.451692000 | 12.237171000 | 2.130455000 |
| 1  | 7.339302000 | 11.296161000 | 2.382759000 |
| 6  | 4.258514000 | 9.585653000  | 3.545256000 |
| 1  | 5.184164000 | 9.899170000  | 4.041215000 |
| 1  | 4.480281000 | 9.400412000  | 2.488020000 |
| 1  | 3.939267000 | 8.637685000  | 3.995406000 |
| 6  | 1.866235000 | 10.185094000 | 2.993988000 |
| 1  | 1.499200000 | 9.252554000  | 3.438651000 |

|   |              |              |              |
|---|--------------|--------------|--------------|
| 1 | 2.047640000  | 10.002332000 | 1.927509000  |
| 1 | 1.070446000  | 10.936004000 | 3.080662000  |
| 6 | 2.862379000  | 10.863987000 | 5.208693000  |
| 1 | 3.753831000  | 11.200831000 | 5.748564000  |
| 1 | 2.532982000  | 9.920343000  | 5.661491000  |
| 1 | 2.067735000  | 11.604209000 | 5.362691000  |
| 6 | 3.156559000  | 10.655502000 | 3.706387000  |
| 6 | 3.596174000  | 11.988880000 | 3.017516000  |
| 1 | 3.697994000  | 11.793147000 | 1.944445000  |
| 1 | 2.791373000  | 12.726575000 | 3.124658000  |
| 6 | 5.057078000  | 13.404069000 | 4.518748000  |
| 6 | 3.993385000  | 14.083558000 | 5.167687000  |
| 1 | 2.976492000  | 13.962285000 | 4.821406000  |
| 6 | 4.276965000  | 14.909215000 | 6.244950000  |
| 1 | 3.474481000  | 15.448668000 | 6.737398000  |
| 6 | 5.597060000  | 15.034376000 | 6.702670000  |
| 1 | 5.837608000  | 15.640580000 | 7.567937000  |
| 6 | 6.600075000  | 14.332926000 | 6.032095000  |
| 6 | 7.986547000  | 14.277663000 | 6.634625000  |
| 1 | 8.174547000  | 15.196609000 | 7.206821000  |
| 1 | 7.980256000  | 13.455409000 | 7.356167000  |
| 6 | 9.749709000  | 15.304518000 | 5.257132000  |
| 1 | 10.701661000 | 15.044189000 | 4.785219000  |
| 1 | 9.956179000  | 15.955022000 | 6.119538000  |
| 6 | 8.924297000  | 16.055218000 | 4.235804000  |
| 6 | 8.967094000  | 17.444782000 | 4.177655000  |
| 1 | 9.520507000  | 18.006070000 | 4.920396000  |
| 6 | 8.291285000  | 18.086893000 | 3.128435000  |
| 1 | 8.312499000  | 19.168485000 | 3.046747000  |
| 6 | 7.585106000  | 17.342666000 | 2.197396000  |
| 1 | 7.049668000  | 17.837695000 | 1.401783000  |
| 6 | 7.545825000  | 15.927216000 | 2.317410000  |
| 6 | 6.285727000  | 15.579181000 | 0.169907000  |
| 1 | 6.493023000  | 14.793874000 | -0.565875000 |
| 1 | 6.828677000  | 16.468449000 | -0.169644000 |
| 6 | 4.752999000  | 15.870736000 | 0.138038000  |
| 6 | 4.415965000  | 16.362825000 | -1.289579000 |
| 1 | 3.340937000  | 16.555604000 | -1.385363000 |
| 1 | 4.692984000  | 15.613505000 | -2.041911000 |
| 1 | 4.947961000  | 17.293482000 | -1.524313000 |
| 6 | 4.351683000  | 16.952901000 | 1.163882000  |
| 1 | 4.631959000  | 16.659110000 | 2.181463000  |
| 1 | 3.265530000  | 17.105524000 | 1.143766000  |
| 1 | 4.824512000  | 17.916199000 | 0.938589000  |
| 6 | 3.970941000  | 14.574356000 | 0.434926000  |
| 1 | 4.235336000  | 14.180199000 | 1.420891000  |
| 1 | 4.189140000  | 13.804495000 | -0.316408000 |
| 1 | 2.890555000  | 14.762474000 | 0.417196000  |
| 6 | 10.081161000 | 13.012497000 | 6.174397000  |
| 1 | 10.345902000 | 13.206157000 | 7.222983000  |
| 1 | 10.976157000 | 13.120729000 | 5.561302000  |
| 6 | 9.546486000  | 11.547918000 | 5.964681000  |
| 6 | 8.619565000  | 11.085593000 | 7.124615000  |
| 6 | 7.343016000  | 10.578290000 | 6.838288000  |
| 1 | 7.028442000  | 10.552921000 | 5.803187000  |
| 6 | 6.501094000  | 10.129608000 | 7.864321000  |
| 1 | 5.516233000  | 9.741639000  | 7.620332000  |
| 6 | 6.923140000  | 10.180944000 | 9.198161000  |
| 1 | 6.271223000  | 9.835743000  | 9.994685000  |
| 6 | 8.198689000  | 10.679300000 | 9.495845000  |
| 1 | 8.540816000  | 10.719802000 | 10.525711000 |
| 6 | 9.039846000  | 11.121796000 | 8.468192000  |
| 1 | 10.030488000 | 11.487125000 | 8.721274000  |
| 6 | 10.741809000 | 10.562063000 | 5.912969000  |
| 6 | 11.928803000 | 10.760805000 | 6.640244000  |
| 1 | 12.060277000 | 11.647505000 | 7.251569000  |
| 6 | 12.969115000 | 9.822573000  | 6.585851000  |
| 1 | 13.879813000 | 9.998805000  | 7.150544000  |
| 6 | 12.837874000 | 8.667080000  | 5.807992000  |
| 1 | 13.643245000 | 7.940358000  | 5.766274000  |
| 6 | 11.657804000 | 8.459656000  | 5.080567000  |
| 1 | 11.545652000 | 7.568370000  | 4.470037000  |
| 6 | 10.623092000 | 9.399183000  | 5.132670000  |
| 1 | 9.715073000  | 9.255157000  | 4.559718000  |
| 7 | 4.868169000  | 12.555571000 | 3.462632000  |

|    |              |              |              |
|----|--------------|--------------|--------------|
| 1  | 5.712771000  | 12.325986000 | 2.935549000  |
| 7  | 6.353601000  | 13.571898000 | 4.935932000  |
| 7  | 9.104610000  | 14.033891000 | 5.683179000  |
| 7  | 8.230238000  | 15.307804000 | 3.331672000  |
| 7  | 6.855195000  | 15.128268000 | 1.446739000  |
| 1  | 6.923067000  | 14.122236000 | 1.594582000  |
| 8  | 8.841061000  | 11.505282000 | 4.726611000  |
| 6  | 8.164010000  | 11.179882000 | 0.087571000  |
| 6  | 8.329565000  | 12.320551000 | -0.823894000 |
| 6  | 7.682856000  | 12.349457000 | -2.087930000 |
| 6  | 7.933161000  | 13.376423000 | -3.000142000 |
| 6  | 8.826893000  | 14.405610000 | -2.677249000 |
| 6  | 9.474402000  | 14.393589000 | -1.433161000 |
| 6  | 9.238156000  | 13.365771000 | -0.520555000 |
| 1  | 10.164892000 | 15.189458000 | -1.173377000 |
| 1  | 7.441249000  | 13.364529000 | -3.967153000 |
| 1  | 7.023136000  | 11.540266000 | -2.374287000 |
| 1  | 9.728146000  | 13.386437000 | 0.446304000  |
| 6  | 6.992731000  | 10.305296000 | -0.030797000 |
| 6  | 5.707950000  | 10.829217000 | -0.325097000 |
| 1  | 5.580680000  | 11.901820000 | -0.397952000 |
| 6  | 4.608993000  | 9.987362000  | -0.490832000 |
| 1  | 3.636113000  | 10.411217000 | -0.716261000 |
| 6  | 4.757652000  | 8.598042000  | -0.360871000 |
| 6  | 6.013172000  | 8.062107000  | -0.045057000 |
| 1  | 6.135525000  | 6.989378000  | 0.059716000  |
| 6  | 7.114882000  | 8.901800000  | 0.129123000  |
| 1  | 8.080150000  | 8.463965000  | 0.351749000  |
| 17 | 10.807502000 | 13.390931000 | 2.732081000  |
| 1  | 9.021001000  | 15.202957000 | -3.387194000 |
| 1  | 3.903550000  | 7.943253000  | -0.497129000 |
| 6  | 9.404017000  | 10.639214000 | 0.746266000  |
| 1  | 9.992559000  | 10.076839000 | 0.004113000  |
| 1  | 10.034427000 | 11.442731000 | 1.127520000  |
| 1  | 9.176262000  | 9.965610000  | 1.574564000  |

<sup>5</sup>P<sub>OH,1Cl,PP:</sub>

|    |             |              |              |
|----|-------------|--------------|--------------|
| 26 | 7.445839000 | 12.370768000 | 3.820895000  |
| 8  | 5.605120000 | 7.793711000  | 1.087528000  |
| 1  | 6.213492000 | 8.486390000  | 1.435319000  |
| 6  | 4.881148000 | 7.895672000  | 4.843982000  |
| 1  | 5.660671000 | 8.576874000  | 5.203925000  |
| 1  | 5.154200000 | 7.567747000  | 3.833958000  |
| 1  | 4.870874000 | 7.017810000  | 5.501264000  |
| 6  | 2.418387000 | 7.576857000  | 4.381582000  |
| 1  | 2.366939000 | 6.727648000  | 5.072958000  |
| 1  | 2.644257000 | 7.184387000  | 3.382257000  |
| 1  | 1.426384000 | 8.045316000  | 4.348214000  |
| 6  | 3.160454000 | 9.081315000  | 6.265655000  |
| 1  | 3.884038000 | 9.827497000  | 6.610486000  |
| 1  | 3.179946000 | 8.243134000  | 6.973355000  |
| 1  | 2.158408000 | 9.526826000  | 6.305020000  |
| 6  | 3.497825000 | 8.584422000  | 4.843495000  |
| 6  | 3.494938000 | 9.759170000  | 3.817442000  |
| 1  | 3.659093000 | 9.334070000  | 2.820433000  |
| 1  | 2.507124000 | 10.232183000 | 3.802206000  |
| 6  | 4.375606000 | 11.996826000 | 4.620320000  |
| 6  | 3.165831000 | 12.414606000 | 5.231194000  |
| 1  | 2.301070000 | 11.767489000 | 5.227151000  |
| 6  | 3.117396000 | 13.648315000 | 5.861011000  |
| 1  | 2.198682000 | 13.971159000 | 6.339077000  |
| 6  | 4.254767000 | 14.468880000 | 5.897051000  |
| 1  | 4.241256000 | 15.425739000 | 6.404680000  |
| 6  | 5.412702000 | 14.026444000 | 5.261401000  |
| 6  | 6.625423000 | 14.943343000 | 5.230784000  |
| 1  | 6.417956000 | 15.739247000 | 4.504846000  |
| 1  | 6.721453000 | 15.433131000 | 6.207567000  |
| 6  | 8.635520000 | 15.079506000 | 3.798101000  |
| 1  | 9.616371000 | 14.610583000 | 3.666692000  |
| 1  | 8.804970000 | 16.119824000 | 4.109344000  |
| 6  | 7.905451000 | 15.051584000 | 2.478152000  |
| 6  | 7.816783000 | 16.194651000 | 1.695939000  |
| 1  | 8.228071000 | 17.131567000 | 2.049862000  |
| 6  | 7.180766000 | 16.099888000 | 0.445138000  |
| 1  | 7.091203000 | 16.974801000 | -0.189547000 |

|    |              |              |              |
|----|--------------|--------------|--------------|
| 6  | 6.662327000  | 14.890145000 | 0.025134000  |
| 1  | 6.163132000  | 14.813683000 | -0.929321000 |
| 6  | 6.775535000  | 13.744798000 | 0.863630000  |
| 6  | 5.706368000  | 12.163545000 | -0.794672000 |
| 1  | 6.107561000  | 11.179712000 | -1.067212000 |
| 1  | 6.043389000  | 12.863288000 | -1.566661000 |
| 6  | 4.150128000  | 12.073469000 | -0.814734000 |
| 6  | 3.737678000  | 11.603757000 | -2.229299000 |
| 1  | 2.646869000  | 11.523406000 | -2.302885000 |
| 1  | 4.164878000  | 10.619961000 | -2.459300000 |
| 1  | 4.076877000  | 12.311080000 | -2.996809000 |
| 6  | 3.509060000  | 13.447286000 | -0.519841000 |
| 1  | 3.817579000  | 13.827277000 | 0.460704000  |
| 1  | 2.415521000  | 13.361772000 | -0.517224000 |
| 1  | 3.783603000  | 14.188898000 | -1.280426000 |
| 6  | 3.674406000  | 11.046160000 | 0.235808000  |
| 1  | 3.925115000  | 11.380590000 | 1.248508000  |
| 1  | 4.140878000  | 10.065822000 | 0.078747000  |
| 1  | 2.586250000  | 10.919748000 | 0.180484000  |
| 6  | 8.823222000  | 13.945718000 | 5.985855000  |
| 1  | 8.736990000  | 14.683907000 | 6.791942000  |
| 1  | 9.843063000  | 14.009451000 | 5.601874000  |
| 6  | 8.645320000  | 12.470684000 | 6.487762000  |
| 6  | 7.528390000  | 12.282104000 | 7.542274000  |
| 6  | 6.922330000  | 11.016501000 | 7.647859000  |
| 1  | 7.213573000  | 10.246287000 | 6.943898000  |
| 6  | 5.964040000  | 10.754322000 | 8.631671000  |
| 1  | 5.516412000  | 9.767270000  | 8.696655000  |
| 6  | 5.582012000  | 11.758327000 | 9.532815000  |
| 1  | 4.836882000  | 11.556816000 | 10.295982000 |
| 6  | 6.174621000  | 13.020976000 | 9.439274000  |
| 1  | 5.890689000  | 13.809572000 | 10.129697000 |
| 6  | 7.141788000  | 13.278168000 | 8.456046000  |
| 1  | 7.587157000  | 14.266502000 | 8.421526000  |
| 6  | 9.997760000  | 12.052124000 | 7.129188000  |
| 6  | 10.466430000 | 12.639228000 | 8.318578000  |
| 1  | 9.858522000  | 13.369874000 | 8.842323000  |
| 6  | 11.709002000 | 12.277774000 | 8.853084000  |
| 1  | 12.054536000 | 12.742066000 | 9.771996000  |
| 6  | 12.500918000 | 11.317110000 | 8.210583000  |
| 1  | 13.462345000 | 11.033281000 | 8.627436000  |
| 6  | 12.038621000 | 10.724072000 | 7.029369000  |
| 1  | 12.642091000 | 9.974714000  | 6.525300000  |
| 6  | 10.798421000 | 11.091803000 | 6.491992000  |
| 1  | 10.426872000 | 10.642759000 | 5.579371000  |
| 7  | 4.524555000  | 10.785734000 | 4.011569000  |
| 1  | 5.435779000  | 10.590182000 | 3.606973000  |
| 7  | 5.473550000  | 12.828252000 | 4.618954000  |
| 7  | 7.914665000  | 14.301180000 | 4.849108000  |
| 7  | 7.388990000  | 13.844013000 | 2.093757000  |
| 7  | 6.306617000  | 12.521674000 | 0.495526000  |
| 1  | 6.539686000  | 11.745151000 | 1.109396000  |
| 8  | 8.389261000  | 11.662333000 | 5.341381000  |
| 6  | 6.392230000  | 6.721176000  | 0.451959000  |
| 6  | 7.121300000  | 7.312983000  | -0.768040000 |
| 6  | 8.510427000  | 7.226791000  | -0.947338000 |
| 6  | 9.124156000  | 7.795103000  | -2.074193000 |
| 6  | 8.357580000  | 8.459039000  | -3.035864000 |
| 6  | 6.967767000  | 8.551106000  | -2.866687000 |
| 6  | 6.358977000  | 7.982981000  | -1.744894000 |
| 1  | 6.361954000  | 9.059994000  | -3.610185000 |
| 1  | 10.200182000 | 7.716441000  | -2.193979000 |
| 1  | 9.127915000  | 6.718526000  | -0.216302000 |
| 1  | 5.283912000  | 8.052205000  | -1.618217000 |
| 6  | 5.384780000  | 5.646967000  | 0.016347000  |
| 6  | 4.044277000  | 5.690017000  | 0.428086000  |
| 1  | 3.708232000  | 6.520473000  | 1.034985000  |
| 6  | 3.152520000  | 4.675251000  | 0.054292000  |
| 1  | 2.117554000  | 4.725284000  | 0.379200000  |
| 6  | 3.588882000  | 3.602834000  | -0.731342000 |
| 6  | 4.926726000  | 3.553107000  | -1.146351000 |
| 1  | 5.276812000  | 2.728372000  | -1.759471000 |
| 6  | 5.814951000  | 4.568152000  | -0.777294000 |
| 1  | 6.845946000  | 4.526212000  | -1.115771000 |
| 17 | 7.524003000  | 10.191047000 | 2.446444000  |

|   |             |             |              |
|---|-------------|-------------|--------------|
| 1 | 8.832444000 | 8.897802000 | -3.907642000 |
| 1 | 2.897603000 | 2.817021000 | -1.019353000 |
| 6 | 7.344053000 | 6.134370000 | 1.513234000  |
| 1 | 6.751083000 | 5.783250000 | 2.361933000  |
| 1 | 7.913142000 | 5.286207000 | 1.121152000  |
| 1 | 8.047494000 | 6.894063000 | 1.870344000  |

<sup>5</sup>Re<sub>1Br,PP</sub>:

|    |              |              |              |
|----|--------------|--------------|--------------|
| 26 | 6.110258000  | 12.596821000 | 3.188089000  |
| 8  | 4.768434000  | 11.231144000 | 2.932336000  |
| 1  | 5.053253000  | 10.411725000 | 2.485871000  |
| 6  | 3.845351000  | 8.716024000  | 5.740778000  |
| 1  | 4.727756000  | 9.227088000  | 5.339771000  |
| 1  | 3.218341000  | 8.404242000  | 4.895532000  |
| 1  | 4.184021000  | 7.812253000  | 6.261295000  |
| 6  | 1.818121000  | 8.875663000  | 7.238349000  |
| 1  | 2.122452000  | 7.972511000  | 7.780052000  |
| 1  | 1.157480000  | 8.569856000  | 6.417270000  |
| 1  | 1.237706000  | 9.503037000  | 7.926747000  |
| 6  | 3.960033000  | 10.044221000 | 7.888060000  |
| 1  | 4.819762000  | 10.626808000 | 7.540930000  |
| 1  | 4.339256000  | 9.155821000  | 8.407694000  |
| 1  | 3.406674000  | 10.649242000 | 8.617018000  |
| 6  | 3.057831000  | 9.631385000  | 6.705683000  |
| 6  | 2.541236000  | 10.888025000 | 5.938777000  |
| 1  | 1.861791000  | 10.544163000 | 5.148893000  |
| 1  | 1.941895000  | 11.505466000 | 6.615386000  |
| 6  | 4.076558000  | 12.882760000 | 5.743033000  |
| 6  | 3.653103000  | 13.501463000 | 6.951414000  |
| 1  | 2.895026000  | 13.032302000 | 7.561597000  |
| 6  | 4.235587000  | 14.689903000 | 7.354436000  |
| 1  | 3.917600000  | 15.159273000 | 8.279319000  |
| 6  | 5.248591000  | 15.274552000 | 6.579132000  |
| 1  | 5.739480000  | 16.188523000 | 6.889749000  |
| 6  | 5.622577000  | 14.643847000 | 5.396490000  |
| 6  | 6.661805000  | 15.307701000 | 4.519880000  |
| 1  | 6.160768000  | 16.101984000 | 3.955212000  |
| 1  | 7.410242000  | 15.797209000 | 5.153574000  |
| 6  | 7.432582000  | 15.108973000 | 2.200741000  |
| 1  | 8.079937000  | 14.507131000 | 1.556316000  |
| 1  | 7.878304000  | 16.107036000 | 2.299515000  |
| 6  | 6.068603000  | 15.192737000 | 1.565014000  |
| 6  | 5.728368000  | 16.249569000 | 0.730294000  |
| 1  | 6.414767000  | 17.074055000 | 0.584148000  |
| 6  | 4.483878000  | 16.204673000 | 0.078136000  |
| 1  | 4.188639000  | 17.008190000 | -0.588012000 |
| 6  | 3.635458000  | 15.130538000 | 0.277559000  |
| 1  | 2.687305000  | 15.081404000 | -0.237877000 |
| 6  | 4.019578000  | 14.080205000 | 1.161149000  |
| 6  | 1.951162000  | 12.806531000 | 0.685369000  |
| 1  | 2.133992000  | 12.632723000 | -0.387442000 |
| 1  | 1.356869000  | 13.726388000 | 0.765577000  |
| 6  | 1.089117000  | 11.642463000 | 1.237391000  |
| 6  | -0.187722000 | 11.575123000 | 0.364508000  |
| 1  | -0.849162000 | 10.777377000 | 0.721271000  |
| 1  | 0.060296000  | 11.365994000 | -0.683346000 |
| 1  | -0.744524000 | 12.519517000 | 0.403265000  |
| 6  | 0.690828000  | 11.926663000 | 2.702946000  |
| 1  | 1.572836000  | 12.039060000 | 3.341361000  |
| 1  | 0.080963000  | 11.106213000 | 3.099824000  |
| 1  | 0.102343000  | 12.850169000 | 2.773661000  |
| 6  | 1.837452000  | 10.292494000 | 1.134335000  |
| 1  | 2.719217000  | 10.262876000 | 1.782214000  |
| 1  | 2.160654000  | 10.102102000 | 0.103233000  |
| 1  | 1.174232000  | 9.473035000  | 1.436534000  |
| 6  | 8.680042000  | 13.888687000 | 3.955713000  |
| 1  | 9.272426000  | 14.682633000 | 4.423201000  |
| 1  | 9.192049000  | 13.575662000 | 3.044978000  |
| 6  | 8.544244000  | 12.619549000 | 4.854635000  |
| 6  | 8.348365000  | 12.916170000 | 6.360782000  |
| 6  | 7.557917000  | 12.044967000 | 7.129569000  |
| 1  | 7.046837000  | 11.231166000 | 6.630315000  |
| 6  | 7.425735000  | 12.226379000 | 8.510283000  |
| 1  | 6.810016000  | 11.541716000 | 9.085484000  |
| 6  | 8.082456000  | 13.285339000 | 9.150388000  |

|    |              |              |              |
|----|--------------|--------------|--------------|
| 1  | 7.979534000  | 13.427547000 | 10.221454000 |
| 6  | 8.876881000  | 14.155421000 | 8.395815000  |
| 1  | 9.395436000  | 14.977995000 | 8.878626000  |
| 6  | 9.012537000  | 13.969341000 | 7.013690000  |
| 1  | 9.649552000  | 14.651921000 | 6.461698000  |
| 6  | 9.819433000  | 11.753974000 | 4.707708000  |
| 6  | 11.102237000 | 12.319946000 | 4.817830000  |
| 1  | 11.222023000 | 13.382946000 | 5.001132000  |
| 6  | 12.246650000 | 11.521464000 | 4.699946000  |
| 1  | 13.228982000 | 11.975666000 | 4.785759000  |
| 6  | 12.125425000 | 10.143533000 | 4.478225000  |
| 1  | 13.012262000 | 9.524073000  | 4.389810000  |
| 6  | 10.850973000 | 9.573468000  | 4.373577000  |
| 1  | 10.745018000 | 8.506652000  | 4.201574000  |
| 6  | 9.706756000  | 10.372947000 | 4.486106000  |
| 1  | 8.718719000  | 9.939487000  | 4.395923000  |
| 7  | 3.575376000  | 11.701228000 | 5.296593000  |
| 1  | 3.958015000  | 11.359168000 | 4.399743000  |
| 7  | 5.042957000  | 13.492203000 | 4.962786000  |
| 7  | 7.346699000  | 14.420448000 | 3.525105000  |
| 7  | 5.236183000  | 14.139450000 | 1.804742000  |
| 7  | 3.226845000  | 13.000578000 | 1.386101000  |
| 1  | 3.638336000  | 12.237059000 | 1.939998000  |
| 8  | 7.415267000  | 11.888152000 | 4.351590000  |
| 6  | 12.226897000 | 12.926893000 | -0.442708000 |
| 6  | 13.578201000 | 12.623264000 | -0.891289000 |
| 6  | 14.114011000 | 13.134371000 | -2.108851000 |
| 6  | 15.394083000 | 12.790604000 | -2.541359000 |
| 6  | 16.196295000 | 11.924476000 | -1.782751000 |
| 6  | 15.688495000 | 11.396339000 | -0.586836000 |
| 6  | 14.405725000 | 11.729620000 | -0.152149000 |
| 1  | 16.296641000 | 10.722803000 | 0.009563000  |
| 1  | 15.764974000 | 13.189123000 | -3.480919000 |
| 1  | 13.501104000 | 13.776216000 | -2.730655000 |
| 1  | 14.042306000 | 11.313389000 | 0.780263000  |
| 6  | 11.523219000 | 14.146273000 | -0.834361000 |
| 6  | 12.221329000 | 15.357387000 | -1.106225000 |
| 1  | 13.300493000 | 15.379124000 | -1.009097000 |
| 6  | 11.545542000 | 16.528071000 | -1.451165000 |
| 1  | 12.111372000 | 17.435865000 | -1.638016000 |
| 6  | 10.146282000 | 16.542288000 | -1.543046000 |
| 6  | 9.433753000  | 15.365370000 | -1.271094000 |
| 1  | 8.349775000  | 15.359546000 | -1.338563000 |
| 6  | 10.103098000 | 14.192801000 | -0.915820000 |
| 1  | 9.517612000  | 13.301683000 | -0.720674000 |
| 35 | 7.423619000  | 11.756216000 | 0.971263000  |
| 1  | 17.192901000 | 11.660386000 | -2.121228000 |
| 1  | 9.622126000  | 17.452670000 | -1.815419000 |
| 6  | 11.567040000 | 11.963283000 | 0.517029000  |
| 1  | 11.764515000 | 10.920076000 | 0.244338000  |
| 1  | 11.948524000 | 12.099708000 | 1.542191000  |
| 1  | 10.485132000 | 12.096261000 | 0.572145000  |

<sup>5</sup>TS<sub>OH,1Br,PP:</sub>

|    |             |              |             |
|----|-------------|--------------|-------------|
| 26 | 8.478605000 | 13.155384000 | 3.698949000 |
| 8  | 7.503609000 | 12.177693000 | 2.134572000 |
| 1  | 7.463016000 | 11.245854000 | 2.439241000 |
| 6  | 4.464831000 | 9.473613000  | 3.709618000 |
| 1  | 5.373190000 | 9.845437000  | 4.196604000 |
| 1  | 4.700936000 | 9.256592000  | 2.661714000 |
| 1  | 4.181885000 | 8.531399000  | 4.194856000 |
| 6  | 2.051733000 | 9.951652000  | 3.128990000 |
| 1  | 1.721228000 | 9.025069000  | 3.612947000 |
| 1  | 2.244233000 | 9.730650000  | 2.071880000 |
| 1  | 1.226003000 | 10.672835000 | 3.181922000 |
| 6  | 3.010190000 | 10.759817000 | 5.315606000 |
| 1  | 3.884263000 | 11.154919000 | 5.843733000 |
| 1  | 2.717943000 | 9.822204000  | 5.805267000 |
| 1  | 2.183949000 | 11.471095000 | 5.436756000 |
| 6  | 3.319435000 | 10.502951000 | 3.824002000 |
| 6  | 3.708698000 | 11.823700000 | 3.083101000 |
| 1  | 3.815021000 | 11.590149000 | 2.018259000 |
| 1  | 2.877673000 | 12.535452000 | 3.164120000 |
| 6  | 5.115783000 | 13.365910000 | 4.505939000 |
| 6  | 4.023000000 | 14.007002000 | 5.144120000 |

|   |              |              |              |
|---|--------------|--------------|--------------|
| 1 | 3.009469000  | 13.795711000 | 4.833723000  |
| 6 | 4.271982000  | 14.910357000 | 6.166565000  |
| 1 | 3.444835000  | 15.419561000 | 6.650454000  |
| 6 | 5.589133000  | 15.152521000 | 6.578579000  |
| 1 | 5.807408000  | 15.824223000 | 7.400547000  |
| 6 | 6.624597000  | 14.481936000 | 5.922892000  |
| 6 | 8.021921000  | 14.591120000 | 6.496797000  |
| 1 | 8.173472000  | 15.611004000 | 6.874940000  |
| 1 | 8.051906000  | 13.932710000 | 7.369664000  |
| 6 | 9.828341000  | 15.430337000 | 5.067777000  |
| 1 | 10.758517000 | 15.104712000 | 4.592561000  |
| 1 | 10.076586000 | 16.134774000 | 5.875090000  |
| 6 | 8.992768000  | 16.127295000 | 4.017691000  |
| 6 | 9.036885000  | 17.510321000 | 3.873785000  |
| 1 | 9.610384000  | 18.113909000 | 4.566437000  |
| 6 | 8.331528000  | 18.089984000 | 2.807433000  |
| 1 | 8.351181000  | 19.164668000 | 2.660365000  |
| 6 | 7.597351000  | 17.293243000 | 1.943785000  |
| 1 | 7.038838000  | 17.741232000 | 1.136136000  |
| 6 | 7.561891000  | 15.887467000 | 2.148675000  |
| 6 | 6.221050000  | 15.414396000 | 0.074095000  |
| 1 | 6.401206000  | 14.590661000 | -0.625764000 |
| 1 | 6.741678000  | 16.286508000 | -0.337778000 |
| 6 | 4.686269000  | 15.696460000 | 0.094634000  |
| 6 | 4.280227000  | 16.093951000 | -1.344456000 |
| 1 | 3.200734000  | 16.276452000 | -1.401816000 |
| 1 | 4.526974000  | 15.298782000 | -2.059298000 |
| 1 | 4.794989000  | 17.009241000 | -1.662831000 |
| 6 | 4.325958000  | 16.841608000 | 1.065878000  |
| 1 | 4.649204000  | 16.612511000 | 2.087293000  |
| 1 | 3.239639000  | 16.993199000 | 1.081758000  |
| 1 | 4.787263000  | 17.788281000 | 0.760249000  |
| 6 | 3.927038000  | 14.419221000 | 0.510446000  |
| 1 | 4.237951000  | 14.087189000 | 1.505773000  |
| 1 | 4.114491000  | 13.603557000 | -0.199782000 |
| 1 | 2.845838000  | 14.602583000 | 0.530886000  |
| 6 | 10.088266000 | 13.212540000 | 6.183152000  |
| 1 | 10.352127000 | 13.470736000 | 7.218030000  |
| 1 | 10.995746000 | 13.255807000 | 5.579852000  |
| 6 | 9.541480000  | 11.741159000 | 6.061667000  |
| 6 | 8.491934000  | 11.387588000 | 7.140268000  |
| 6 | 7.379638000  | 10.608552000 | 6.783144000  |
| 1 | 7.274459000  | 10.320507000 | 5.745163000  |
| 6 | 6.429300000  | 10.223466000 | 7.736148000  |
| 1 | 5.578841000  | 9.619678000  | 7.433737000  |
| 6 | 6.570850000  | 10.614258000 | 9.073783000  |
| 1 | 5.832833000  | 10.320265000 | 9.813597000  |
| 6 | 7.677608000  | 11.385501000 | 9.447592000  |
| 1 | 7.804631000  | 11.692015000 | 10.481521000 |
| 6 | 8.630509000  | 11.762650000 | 8.491261000  |
| 1 | 9.487351000  | 12.346309000 | 8.813186000  |
| 6 | 10.765215000 | 10.781546000 | 6.168513000  |
| 6 | 11.077243000 | 10.029718000 | 7.313968000  |
| 1 | 10.445610000 | 10.083920000 | 8.192068000  |
| 6 | 12.199442000 | 9.188190000  | 7.340783000  |
| 1 | 12.415755000 | 8.614790000  | 8.237542000  |
| 6 | 13.031403000 | 9.082500000  | 6.222307000  |
| 1 | 13.899065000 | 8.429991000  | 6.242638000  |
| 6 | 12.730448000 | 9.828173000  | 5.073919000  |
| 1 | 13.367831000 | 9.756582000  | 4.197086000  |
| 6 | 11.610213000 | 10.664628000 | 5.047031000  |
| 1 | 11.379816000 | 11.242101000 | 4.159125000  |
| 7 | 4.960604000  | 12.453847000 | 3.499264000  |
| 1 | 5.808712000  | 12.245399000 | 2.965878000  |
| 7 | 6.409162000  | 13.642039000 | 4.880979000  |
| 7 | 9.146232000  | 14.218148000 | 5.596716000  |
| 7 | 8.273105000  | 15.328911000 | 3.179003000  |
| 7 | 6.848221000  | 15.037559000 | 1.347373000  |
| 1 | 6.931287000  | 14.041688000 | 1.546175000  |
| 8 | 8.967737000  | 11.615280000 | 4.753469000  |
| 6 | 8.136133000  | 11.047081000 | 0.079268000  |
| 6 | 8.243220000  | 12.143716000 | -0.892303000 |
| 6 | 7.533639000  | 12.106448000 | -2.122872000 |
| 6 | 7.725043000  | 13.091534000 | -3.093347000 |
| 6 | 8.621583000  | 14.143308000 | -2.864869000 |

|    |              |              |              |
|----|--------------|--------------|--------------|
| 6  | 9.333153000  | 14.194764000 | -1.657580000 |
| 6  | 9.155829000  | 13.209010000 | -0.687446000 |
| 1  | 10.027978000 | 15.007122000 | -1.471047000 |
| 1  | 7.185531000  | 13.028934000 | -4.032492000 |
| 1  | 6.872300000  | 11.277530000 | -2.339702000 |
| 1  | 9.698937000  | 13.280251000 | 0.247561000  |
| 6  | 6.977119000  | 10.149902000 | 0.045122000  |
| 6  | 5.673385000  | 10.637669000 | -0.226639000 |
| 1  | 5.520292000  | 11.704582000 | -0.328796000 |
| 6  | 4.589454000  | 9.767718000  | -0.335742000 |
| 1  | 3.601750000  | 10.163298000 | -0.547110000 |
| 6  | 4.772916000  | 8.386675000  | -0.168675000 |
| 6  | 6.047780000  | 7.887456000  | 0.129333000  |
| 1  | 6.196698000  | 6.821461000  | 0.263311000  |
| 6  | 7.134745000  | 8.755430000  | 0.246889000  |
| 1  | 8.115359000  | 8.345196000  | 0.453677000  |
| 35 | 10.973202000 | 13.426784000 | 2.509147000  |
| 1  | 8.769695000  | 14.908183000 | -3.620153000 |
| 1  | 3.930370000  | 7.709872000  | -0.262210000 |
| 6  | 9.408667000  | 10.559566000 | 0.714894000  |
| 1  | 9.997110000  | 10.004620000 | -0.032689000 |
| 1  | 10.022576000 | 11.389452000 | 1.067935000  |
| 1  | 9.224334000  | 9.894624000  | 1.560707000  |

<sup>5</sup>P<sub>OH,1Br,PP:</sub>

|    |             |              |              |
|----|-------------|--------------|--------------|
| 26 | 7.497976000 | 12.383983000 | 3.863727000  |
| 8  | 5.575347000 | 7.742509000  | 1.009336000  |
| 1  | 6.199305000 | 8.421491000  | 1.356659000  |
| 6  | 4.930729000 | 7.852552000  | 4.827497000  |
| 1  | 5.717853000 | 8.525962000  | 5.185223000  |
| 1  | 5.196331000 | 7.525949000  | 3.815059000  |
| 1  | 4.916140000 | 6.972421000  | 5.481638000  |
| 6  | 2.465777000 | 7.556580000  | 4.365109000  |
| 1  | 2.410610000 | 6.700494000  | 5.047650000  |
| 1  | 2.686679000 | 7.173134000  | 3.361176000  |
| 1  | 1.476781000 | 8.031769000  | 4.339184000  |
| 6  | 3.220824000 | 9.039604000  | 6.261237000  |
| 1  | 3.948862000 | 9.779631000  | 6.609865000  |
| 1  | 3.237316000 | 8.195972000  | 6.962461000  |
| 1  | 2.221213000 | 9.489987000  | 6.306057000  |
| 6  | 3.553013000 | 8.552140000  | 4.834760000  |
| 6  | 3.558337000 | 9.735464000  | 3.818969000  |
| 1  | 3.731357000 | 9.318985000  | 2.819630000  |
| 1  | 2.570189000 | 10.207330000 | 3.798786000  |
| 6  | 4.420725000 | 11.974648000 | 4.635784000  |
| 6  | 3.202314000 | 12.380543000 | 5.237647000  |
| 1  | 2.345727000 | 11.722746000 | 5.231763000  |
| 6  | 3.134397000 | 13.616149000 | 5.861611000  |
| 1  | 2.208920000 | 13.929520000 | 6.332867000  |
| 6  | 4.261083000 | 14.450849000 | 5.899979000  |
| 1  | 4.232410000 | 15.410489000 | 6.401675000  |
| 6  | 5.428572000 | 14.019457000 | 5.274390000  |
| 6  | 6.626796000 | 14.954674000 | 5.243461000  |
| 1  | 6.413483000 | 15.737543000 | 4.505196000  |
| 1  | 6.705922000 | 15.458573000 | 6.214534000  |
| 6  | 8.652086000 | 15.108775000 | 3.834038000  |
| 1  | 9.636657000 | 14.645523000 | 3.709820000  |
| 1  | 8.813361000 | 16.150744000 | 4.144260000  |
| 6  | 7.928169000 | 15.074046000 | 2.511279000  |
| 6  | 7.835160000 | 16.216340000 | 1.728299000  |
| 1  | 8.241421000 | 17.155309000 | 2.082607000  |
| 6  | 7.200508000 | 16.118379000 | 0.477369000  |
| 1  | 7.107526000 | 16.992396000 | -0.158025000 |
| 6  | 6.687005000 | 14.906096000 | 0.058591000  |
| 1  | 6.187966000 | 14.827027000 | -0.895655000 |
| 6  | 6.804858000 | 13.761823000 | 0.897703000  |
| 6  | 5.745536000 | 12.178908000 | -0.765887000 |
| 1  | 6.150401000 | 11.196092000 | -1.036619000 |
| 1  | 6.085098000 | 12.879553000 | -1.535942000 |
| 6  | 4.189731000 | 12.085081000 | -0.794200000 |
| 6  | 3.785777000 | 11.625676000 | -2.214575000 |
| 1  | 2.695827000 | 11.538929000 | -2.293275000 |
| 1  | 4.220575000 | 10.646952000 | -2.451661000 |
| 1  | 4.123394000 | 12.342239000 | -2.974170000 |
| 6  | 3.543469000 | 13.454741000 | -0.491458000 |



|                                            |              |              |              |
|--------------------------------------------|--------------|--------------|--------------|
| 1                                          | 3.845640000  | 13.827362000 | 0.493865000  |
| 1                                          | 2.450198000  | 13.366111000 | -0.495583000 |
| 1                                          | 3.819865000  | 14.203399000 | -1.244398000 |
| 6                                          | 3.711421000  | 11.048092000 | 0.245571000  |
| 1                                          | 3.964635000  | 11.370742000 | 1.261497000  |
| 1                                          | 4.173195000  | 10.067432000 | 0.076895000  |
| 1                                          | 2.622690000  | 10.926648000 | 0.190264000  |
| 6                                          | 8.828735000  | 13.997935000 | 6.033057000  |
| 1                                          | 8.724580000  | 14.745150000 | 6.828724000  |
| 1                                          | 9.852313000  | 14.067946000 | 5.660090000  |
| 6                                          | 8.658666000  | 12.527746000 | 6.548542000  |
| 6                                          | 7.526083000  | 12.339170000 | 7.586073000  |
| 6                                          | 6.918881000  | 11.073675000 | 7.684089000  |
| 1                                          | 7.220762000  | 10.302934000 | 6.985239000  |
| 6                                          | 5.946696000  | 10.812565000 | 8.654540000  |
| 1                                          | 5.498755000  | 9.825350000  | 8.714761000  |
| 6                                          | 5.551244000  | 11.817628000 | 9.548621000  |
| 1                                          | 4.795149000  | 11.616827000 | 10.301127000 |
| 6                                          | 6.144845000  | 13.080375000 | 9.462146000  |
| 1                                          | 5.850559000  | 13.869803000 | 10.147270000 |
| 6                                          | 7.126042000  | 13.336449000 | 8.492756000  |
| 1                                          | 7.571631000  | 14.324892000 | 8.462860000  |
| 6                                          | 10.004129000 | 12.127817000 | 7.215792000  |
| 6                                          | 10.454164000 | 12.738637000 | 8.400424000  |
| 1                                          | 9.836920000  | 13.476884000 | 8.902070000  |
| 6                                          | 11.690371000 | 12.391720000 | 8.958740000  |
| 1                                          | 12.021524000 | 12.874299000 | 9.873512000  |
| 6                                          | 12.494422000 | 11.422234000 | 8.345196000  |
| 1                                          | 13.450890000 | 11.149671000 | 8.780557000  |
| 6                                          | 12.050744000 | 10.805866000 | 7.168809000  |
| 1                                          | 12.663871000 | 10.049702000 | 6.687050000  |
| 6                                          | 10.816898000 | 11.158975000 | 6.607471000  |
| 1                                          | 10.459361000 | 10.692532000 | 5.697926000  |
| 7                                          | 4.583954000  | 10.762813000 | 4.031507000  |
| 1                                          | 5.500695000  | 10.569831000 | 3.638126000  |
| 7                                          | 5.509592000  | 12.818337000 | 4.638944000  |
| 7                                          | 7.929326000  | 14.328221000 | 4.881829000  |
| 7                                          | 7.418189000  | 13.863428000 | 2.127689000  |
| 7                                          | 6.338801000  | 12.537464000 | 0.527691000  |
| 1                                          | 6.582571000  | 11.758550000 | 1.133237000  |
| 8                                          | 8.429886000  | 11.706562000 | 5.406127000  |
| 6                                          | 6.342190000  | 6.665858000  | 0.354693000  |
| 6                                          | 7.043158000  | 7.254598000  | -0.883109000 |
| 6                                          | 8.428219000  | 7.170156000  | -1.092292000 |
| 6                                          | 9.016751000  | 7.737365000  | -2.233005000 |
| 6                                          | 8.228704000  | 8.398728000  | -3.178921000 |
| 6                                          | 6.842723000  | 8.488968000  | -2.980005000 |
| 6                                          | 6.258990000  | 7.921766000  | -1.844517000 |
| 1                                          | 6.220296000  | 8.995690000  | -3.711142000 |
| 1                                          | 10.090078000 | 7.660097000  | -2.375732000 |
| 1                                          | 9.062112000  | 6.664272000  | -0.373820000 |
| 1                                          | 5.186781000  | 7.990076000  | -1.695155000 |
| 6                                          | 5.320372000  | 5.595172000  | -0.054233000 |
| 6                                          | 3.992500000  | 5.639824000  | 0.396530000  |
| 1                                          | 3.675618000  | 6.469593000  | 1.014666000  |
| 6                                          | 3.088492000  | 4.627304000  | 0.046996000  |
| 1                                          | 2.063444000  | 4.678584000  | 0.401757000  |
| 6                                          | 3.500033000  | 3.555437000  | -0.752682000 |
| 6                                          | 4.825159000  | 3.504028000  | -1.206415000 |
| 1                                          | 5.155844000  | 2.679659000  | -1.830699000 |
| 6                                          | 5.725482000  | 4.516991000  | -0.861792000 |
| 1                                          | 6.746205000  | 4.473976000  | -1.229931000 |
| 35                                         | 7.705280000  | 10.080593000 | 2.462980000  |
| 1                                          | 8.684031000  | 8.836911000  | -4.061359000 |
| 1                                          | 2.799272000  | 2.771338000  | -1.021829000 |
| 6                                          | 7.318249000  | 6.078401000  | 1.393607000  |
| 1                                          | 6.744954000  | 5.726044000  | 2.255307000  |
| 1                                          | 7.879278000  | 5.231245000  | 0.988117000  |
| 1                                          | 8.026959000  | 6.840257000  | 1.735297000  |
| <b><sup>5</sup>TS<sub>Br,1Br,PP</sub>:</b> |              |              |              |
| 26                                         | 7.249733000  | 13.451273000 | 3.794088000  |
| 8                                          | 5.842751000  | 12.669907000 | 2.614982000  |
| 1                                          | 6.138757000  | 12.094590000 | 1.885511000  |
| 6                                          | 4.184427000  | 9.327245000  | 3.537046000  |

|   |              |              |              |
|---|--------------|--------------|--------------|
| 1 | 5.165858000  | 9.813670000  | 3.560901000  |
| 1 | 3.692301000  | 9.601278000  | 2.594838000  |
| 1 | 4.340483000  | 8.241575000  | 3.534042000  |
| 6 | 1.934247000  | 9.077464000  | 4.656871000  |
| 1 | 2.032283000  | 7.985405000  | 4.651341000  |
| 1 | 1.413607000  | 9.374415000  | 3.737532000  |
| 1 | 1.302895000  | 9.355123000  | 5.510602000  |
| 6 | 4.021853000  | 9.312144000  | 6.058119000  |
| 1 | 4.994356000  | 9.804135000  | 6.168364000  |
| 1 | 4.188197000  | 8.227783000  | 6.060173000  |
| 1 | 3.410654000  | 9.559915000  | 6.934902000  |
| 6 | 3.324817000  | 9.747264000  | 4.751038000  |
| 6 | 3.104532000  | 11.292172000 | 4.730220000  |
| 1 | 2.577141000  | 11.543267000 | 3.800164000  |
| 1 | 2.435989000  | 11.571309000 | 5.551332000  |
| 6 | 4.810244000  | 12.760489000 | 5.859373000  |
| 6 | 4.204207000  | 12.725510000 | 7.144847000  |
| 1 | 3.306346000  | 12.147023000 | 7.309655000  |
| 6 | 4.789635000  | 13.419554000 | 8.192158000  |
| 1 | 4.334427000  | 13.390684000 | 9.176984000  |
| 6 | 5.972867000  | 14.142649000 | 7.984906000  |
| 1 | 6.458358000  | 14.673385000 | 8.795185000  |
| 6 | 6.523761000  | 14.154695000 | 6.703153000  |
| 6 | 7.766062000  | 14.990389000 | 6.457110000  |
| 1 | 7.451518000  | 16.040551000 | 6.420096000  |
| 1 | 8.431354000  | 14.896930000 | 7.323811000  |
| 6 | 8.801946000  | 15.956398000 | 4.451439000  |
| 1 | 9.469284000  | 15.694162000 | 3.624171000  |
| 1 | 9.305766000  | 16.702892000 | 5.081986000  |
| 6 | 7.531914000  | 16.529223000 | 3.870030000  |
| 6 | 7.295931000  | 17.900941000 | 3.845876000  |
| 1 | 7.998943000  | 18.586596000 | 4.302858000  |
| 6 | 6.123370000  | 18.359888000 | 3.220943000  |
| 1 | 5.897098000  | 19.421004000 | 3.199874000  |
| 6 | 5.250331000  | 17.459147000 | 2.633324000  |
| 1 | 4.342550000  | 17.805500000 | 2.158898000  |
| 6 | 5.551204000  | 16.065972000 | 2.669021000  |
| 6 | 3.608196000  | 15.481434000 | 1.247826000  |
| 1 | 3.857325000  | 16.345546000 | 0.615245000  |
| 1 | 2.766340000  | 15.787815000 | 1.890111000  |
| 6 | 3.124583000  | 14.339747000 | 0.313665000  |
| 6 | 1.941149000  | 14.899203000 | -0.511757000 |
| 1 | 1.549300000  | 14.128980000 | -1.186214000 |
| 1 | 2.253598000  | 15.756085000 | -1.121593000 |
| 1 | 1.121834000  | 15.224829000 | 0.141265000  |
| 6 | 2.640293000  | 13.122113000 | 1.134732000  |
| 1 | 3.460191000  | 12.675990000 | 1.706400000  |
| 1 | 2.233094000  | 12.352768000 | 0.466972000  |
| 1 | 1.847056000  | 13.415347000 | 1.834353000  |
| 6 | 4.260209000  | 13.913314000 | -0.645344000 |
| 1 | 5.115699000  | 13.511514000 | -0.092833000 |
| 1 | 4.609128000  | 14.765160000 | -1.242394000 |
| 1 | 3.905051000  | 13.138381000 | -1.335725000 |
| 6 | 9.749514000  | 13.868015000 | 5.388351000  |
| 1 | 10.331792000 | 14.223339000 | 6.249000000  |
| 1 | 10.352274000 | 14.012420000 | 4.490083000  |
| 6 | 9.432697000  | 12.335859000 | 5.461594000  |
| 6 | 9.007119000  | 11.843538000 | 6.870732000  |
| 6 | 8.062377000  | 10.806721000 | 6.961634000  |
| 1 | 7.620792000  | 10.437592000 | 6.044383000  |
| 6 | 7.692884000  | 10.273232000 | 8.200840000  |
| 1 | 6.960576000  | 9.472283000  | 8.244898000  |
| 6 | 8.260785000  | 10.769709000 | 9.381757000  |
| 1 | 7.973062000  | 10.359613000 | 10.344887000 |
| 6 | 9.205801000  | 11.798990000 | 9.305922000  |
| 1 | 9.656280000  | 12.193171000 | 10.212108000 |
| 6 | 9.578990000  | 12.326433000 | 8.061803000  |
| 1 | 10.321376000 | 13.117451000 | 8.038962000  |
| 6 | 10.724221000 | 11.562735000 | 5.072922000  |
| 6 | 11.953575000 | 11.793933000 | 5.717182000  |
| 1 | 12.026116000 | 12.525652000 | 6.514933000  |
| 6 | 13.101252000 | 11.079887000 | 5.350894000  |
| 1 | 14.041073000 | 11.276798000 | 5.858137000  |
| 6 | 13.038030000 | 10.113240000 | 4.339378000  |
| 1 | 13.926179000 | 9.555450000  | 4.058889000  |

|    |              |              |              |
|----|--------------|--------------|--------------|
| 6  | 11.817506000 | 9.873057000  | 3.695975000  |
| 1  | 11.755291000 | 9.121632000  | 2.913838000  |
| 6  | 10.672658000 | 10.595763000 | 4.056801000  |
| 1  | 9.725478000  | 10.430465000 | 3.559276000  |
| 7  | 4.321705000  | 12.099016000 | 4.775171000  |
| 1  | 4.850786000  | 12.215588000 | 3.887707000  |
| 7  | 5.958434000  | 13.500795000 | 5.659183000  |
| 7  | 8.522282000  | 14.698644000 | 5.204493000  |
| 7  | 6.676496000  | 15.623502000 | 3.325495000  |
| 7  | 4.775250000  | 15.132024000 | 2.060073000  |
| 1  | 5.078604000  | 14.143537000 | 2.161939000  |
| 8  | 8.406477000  | 12.070557000 | 4.512667000  |
| 6  | 9.860538000  | 11.992619000 | -0.607161000 |
| 6  | 9.731717000  | 12.885267000 | -1.768287000 |
| 6  | 9.045124000  | 12.466923000 | -2.936586000 |
| 6  | 9.009989000  | 13.274328000 | -4.076271000 |
| 6  | 9.646055000  | 14.520825000 | -4.078809000 |
| 6  | 10.328230000 | 14.953612000 | -2.930349000 |
| 6  | 10.378151000 | 14.147149000 | -1.796587000 |
| 1  | 10.812545000 | 15.924256000 | -2.920382000 |
| 1  | 8.492775000  | 12.924460000 | -4.963401000 |
| 1  | 8.580089000  | 11.489301000 | -2.964268000 |
| 1  | 10.865315000 | 14.511695000 | -0.900337000 |
| 6  | 8.854684000  | 10.971690000 | -0.331614000 |
| 6  | 7.480730000  | 11.193594000 | -0.616856000 |
| 1  | 7.171713000  | 12.150614000 | -1.019372000 |
| 6  | 6.522938000  | 10.222435000 | -0.333854000 |
| 1  | 5.478211000  | 10.418847000 | -0.550280000 |
| 6  | 6.904673000  | 8.997550000  | 0.238143000  |
| 6  | 8.254265000  | 8.759468000  | 0.530034000  |
| 1  | 8.557043000  | 7.814498000  | 0.968074000  |
| 6  | 9.216034000  | 9.733953000  | 0.259339000  |
| 1  | 10.254360000 | 9.524393000  | 0.484521000  |
| 35 | 9.033644000  | 13.819245000 | 1.496765000  |
| 1  | 9.613021000  | 15.149391000 | -4.962413000 |
| 1  | 6.157476000  | 8.242127000  | 0.456475000  |
| 6  | 11.232386000 | 11.847398000 | -0.000242000 |
| 1  | 11.804875000 | 11.111345000 | -0.588392000 |
| 1  | 11.790017000 | 12.782955000 | -0.041487000 |
| 1  | 11.196839000 | 11.506976000 | 1.034723000  |

<sup>5</sup>P<sub>Br,1Br,PP:</sub>

|    |             |              |             |
|----|-------------|--------------|-------------|
| 26 | 6.029181000 | 13.302228000 | 3.510933000 |
| 8  | 4.646734000 | 12.007261000 | 2.823970000 |
| 1  | 4.944233000 | 11.201648000 | 2.359302000 |
| 6  | 3.750095000 | 9.025306000  | 4.976084000 |
| 1  | 4.619700000 | 9.596569000  | 4.632994000 |
| 1  | 3.036299000 | 8.962654000  | 4.144600000 |
| 1  | 4.081820000 | 8.007472000  | 5.214615000 |
| 6  | 1.842871000 | 8.885293000  | 6.625953000 |
| 1  | 2.110147000 | 7.851833000  | 6.876572000 |
| 1  | 1.107229000 | 8.855692000  | 5.812137000 |
| 1  | 1.360294000 | 9.331399000  | 7.504962000 |
| 6  | 4.106596000 | 9.710797000  | 7.382193000 |
| 1  | 4.991143000 | 10.305379000 | 7.129989000 |
| 1  | 4.439096000 | 8.692894000  | 7.620732000 |
| 1  | 3.653852000 | 10.136174000 | 8.286703000 |
| 6  | 3.099284000 | 9.686440000  | 6.212460000 |
| 6  | 2.636151000 | 11.132744000 | 5.853721000 |
| 1  | 1.898707000 | 11.058574000 | 5.043121000 |
| 1  | 2.113300000 | 11.567797000 | 6.711878000 |
| 6  | 4.276052000 | 13.022185000 | 6.136551000 |
| 6  | 3.968591000 | 13.292390000 | 7.498046000 |
| 1  | 3.239055000 | 12.693116000 | 8.024169000 |
| 6  | 4.637260000 | 14.314456000 | 8.154253000 |
| 1  | 4.414189000 | 14.517420000 | 9.196795000 |
| 6  | 5.606983000 | 15.076202000 | 7.482950000 |
| 1  | 6.147893000 | 15.868761000 | 7.985908000 |
| 6  | 5.862293000 | 14.784613000 | 6.144069000 |
| 6  | 6.832770000 | 15.654854000 | 5.362901000 |
| 1  | 6.290801000 | 16.564413000 | 5.073819000 |
| 1  | 7.642353000 | 15.975242000 | 6.031669000 |
| 6  | 7.322212000 | 16.004867000 | 2.973484000 |
| 1  | 7.927401000 | 15.582455000 | 2.164341000 |
| 1  | 7.753927000 | 16.983749000 | 3.229202000 |

|   |              |              |              |
|---|--------------|--------------|--------------|
| 6 | 5.912767000  | 16.184562000 | 2.459136000  |
| 6 | 5.451467000  | 17.434845000 | 2.059517000  |
| 1 | 6.073927000  | 18.312862000 | 2.181271000  |
| 6 | 4.165466000  | 17.519483000 | 1.495661000  |
| 1 | 3.770679000  | 18.480385000 | 1.182012000  |
| 6 | 3.398865000  | 16.377595000 | 1.342191000  |
| 1 | 2.406896000  | 16.435435000 | 0.915859000  |
| 6 | 3.918818000  | 15.118826000 | 1.767802000  |
| 6 | 1.931636000  | 13.890751000 | 0.952286000  |
| 1 | 1.982754000  | 14.444941000 | 0.003060000  |
| 1 | 1.156578000  | 14.379915000 | 1.565107000  |
| 6 | 1.465974000  | 12.444793000 | 0.634476000  |
| 6 | 0.123497000  | 12.557180000 | -0.126935000 |
| 1 | -0.262628000 | 11.559566000 | -0.366116000 |
| 1 | 0.246257000  | 13.107721000 | -1.067958000 |
| 1 | -0.631720000 | 13.076155000 | 0.476663000  |
| 6 | 1.245358000  | 11.639242000 | 1.936391000  |
| 1 | 2.182078000  | 11.513248000 | 2.488440000  |
| 1 | 0.851476000  | 10.642636000 | 1.701211000  |
| 1 | 0.520326000  | 12.143299000 | 2.588413000  |
| 6 | 2.503381000  | 11.728009000 | -0.260655000 |
| 1 | 3.464182000  | 11.616228000 | 0.251994000  |
| 1 | 2.673167000  | 12.287739000 | -1.188993000 |
| 1 | 2.146778000  | 10.726881000 | -0.530879000 |
| 6 | 8.762676000  | 14.461990000 | 4.260898000  |
| 1 | 9.374791000  | 15.058378000 | 4.950154000  |
| 1 | 9.232928000  | 14.524666000 | 3.277582000  |
| 6 | 8.749538000  | 12.935862000 | 4.630875000  |
| 6 | 8.647165000  | 12.654997000 | 6.151880000  |
| 6 | 8.011987000  | 11.470714000 | 6.567611000  |
| 1 | 7.564520000  | 10.839835000 | 5.809410000  |
| 6 | 7.947258000  | 11.120753000 | 7.920025000  |
| 1 | 7.453692000  | 10.199231000 | 8.214555000  |
| 6 | 8.515332000  | 11.953742000 | 8.893906000  |
| 1 | 8.464144000  | 11.685227000 | 9.944560000  |
| 6 | 9.150223000  | 13.134643000 | 8.496135000  |
| 1 | 9.594440000  | 13.791521000 | 9.238231000  |
| 6 | 9.218113000  | 13.479086000 | 7.138292000  |
| 1 | 9.723530000  | 14.399538000 | 6.866759000  |
| 6 | 10.090632000 | 12.338772000 | 4.114935000  |
| 6 | 11.335881000 | 12.737208000 | 4.634914000  |
| 1 | 11.384248000 | 13.449711000 | 5.451845000  |
| 6 | 12.527943000 | 12.210654000 | 4.122332000  |
| 1 | 13.479329000 | 12.531460000 | 4.536592000  |
| 6 | 12.495287000 | 11.270419000 | 3.084083000  |
| 1 | 13.419364000 | 10.859250000 | 2.689149000  |
| 6 | 11.259861000 | 10.864559000 | 2.564708000  |
| 1 | 11.220639000 | 10.133772000 | 1.761647000  |
| 6 | 10.068599000 | 11.397263000 | 3.074155000  |
| 1 | 9.106048000  | 11.094729000 | 2.681155000  |
| 7 | 3.693422000  | 12.035618000 | 5.402038000  |
| 1 | 4.009684000  | 11.937390000 | 4.415538000  |
| 7 | 5.215368000  | 13.792237000 | 5.483564000  |
| 7 | 7.397828000  | 15.054515000 | 4.121208000  |
| 7 | 5.169138000  | 15.050293000 | 2.344988000  |
| 7 | 3.232185000  | 13.958987000 | 1.621421000  |
| 1 | 3.684518000  | 13.099114000 | 2.005548000  |
| 8 | 7.662408000  | 12.337188000 | 3.940557000  |
| 6 | 6.604074000  | 7.959522000  | -0.357522000 |
| 6 | 8.008808000  | 7.649334000  | -0.856021000 |
| 6 | 8.239195000  | 7.358209000  | -2.213722000 |
| 6 | 9.506966000  | 6.956652000  | -2.655709000 |
| 6 | 10.566133000 | 6.839652000  | -1.751919000 |
| 6 | 10.347567000 | 7.120539000  | -0.395576000 |
| 6 | 9.083979000  | 7.516184000  | 0.046198000  |
| 1 | 11.161444000 | 7.034190000  | 0.316946000  |
| 1 | 9.659423000  | 6.736795000  | -3.707384000 |
| 1 | 7.429552000  | 7.432050000  | -2.928524000 |
| 1 | 8.933907000  | 7.747509000  | 1.094453000  |
| 6 | 5.632616000  | 8.442955000  | -1.412304000 |
| 6 | 5.959097000  | 9.545877000  | -2.229971000 |
| 1 | 6.897959000  | 10.065339000 | -2.072370000 |
| 6 | 5.083848000  | 9.987528000  | -3.222366000 |
| 1 | 5.353922000  | 10.840289000 | -3.836494000 |
| 6 | 3.857925000  | 9.335280000  | -3.422990000 |

|    |              |             |              |
|----|--------------|-------------|--------------|
| 6  | 3.520947000  | 8.242356000 | -2.619822000 |
| 1  | 2.576635000  | 7.728164000 | -2.765635000 |
| 6  | 4.399185000  | 7.800644000 | -1.620563000 |
| 1  | 4.113556000  | 6.948608000 | -1.016591000 |
| 1  | 11.548993000 | 6.534241000 | -2.095507000 |
| 1  | 3.176694000  | 9.678536000 | -4.194599000 |
| 6  | 6.080839000  | 6.850614000 | 0.558370000  |
| 1  | 5.950152000  | 5.933531000 | -0.029821000 |
| 1  | 6.801079000  | 6.636938000 | 1.349553000  |
| 1  | 5.126754000  | 7.118317000 | 1.016790000  |
| 35 | 6.798402000  | 9.648894000 | 1.004802000  |

Data for the reaction of phenylmethylmethyl with 1<sub>Cl</sub> and 1<sub>Br</sub>:

<sup>5</sup>Re<sub>Cl,PM</sub>:

|    |              |              |              |
|----|--------------|--------------|--------------|
| 26 | 6.465029000  | 12.132498000 | 3.099545000  |
| 17 | 8.010381000  | 11.255619000 | 1.255300000  |
| 8  | 5.115408000  | 10.814847000 | 2.711825000  |
| 1  | 5.374867000  | 9.949833000  | 2.337462000  |
| 6  | 3.738718000  | 8.554191000  | 5.717075000  |
| 1  | 4.699358000  | 9.022088000  | 5.474459000  |
| 1  | 3.315724000  | 8.145740000  | 4.790689000  |
| 1  | 3.932187000  | 7.716450000  | 6.397794000  |
| 6  | 1.430919000  | 8.873951000  | 6.692697000  |
| 1  | 1.585664000  | 8.044463000  | 7.392649000  |
| 1  | 0.968899000  | 8.467046000  | 5.784392000  |
| 1  | 0.721879000  | 9.574977000  | 7.151196000  |
| 6  | 3.398223000  | 10.112992000 | 7.675331000  |
| 1  | 4.328572000  | 10.654004000 | 7.472236000  |
| 1  | 3.629654000  | 9.288833000  | 8.361178000  |
| 1  | 2.710094000  | 10.794951000 | 8.190386000  |
| 6  | 2.775011000  | 9.568703000  | 6.371761000  |
| 6  | 2.470373000  | 10.729152000 | 5.374885000  |
| 1  | 1.960470000  | 10.297767000 | 4.504467000  |
| 1  | 1.762469000  | 11.426870000 | 5.834596000  |
| 6  | 4.087796000  | 12.665536000 | 5.285543000  |
| 6  | 3.475253000  | 13.407117000 | 6.332225000  |
| 1  | 2.602181000  | 13.014201000 | 6.832838000  |
| 6  | 4.019144000  | 14.618161000 | 6.722876000  |
| 1  | 3.555981000  | 15.183135000 | 7.524885000  |
| 6  | 5.178904000  | 15.101593000 | 6.098917000  |
| 1  | 5.641355000  | 16.030149000 | 6.410612000  |
| 6  | 5.736357000  | 14.351610000 | 5.066864000  |
| 6  | 6.959040000  | 14.898496000 | 4.360298000  |
| 1  | 6.630637000  | 15.715389000 | 3.707872000  |
| 1  | 7.630469000  | 15.341712000 | 5.104366000  |
| 6  | 8.021877000  | 14.523789000 | 2.178957000  |
| 1  | 8.708336000  | 13.846857000 | 1.663147000  |
| 1  | 8.508929000  | 15.502080000 | 2.281378000  |
| 6  | 6.757844000  | 14.639051000 | 1.365934000  |
| 6  | 6.588386000  | 15.662449000 | 0.442752000  |
| 1  | 7.337180000  | 16.438015000 | 0.341046000  |
| 6  | 5.435524000  | 15.644054000 | -0.360514000 |
| 1  | 5.278809000  | 16.415652000 | -1.106626000 |
| 6  | 4.500988000  | 14.635300000 | -0.209589000 |
| 1  | 3.628825000  | 14.605368000 | -0.846098000 |
| 6  | 4.699763000  | 13.627336000 | 0.778563000  |
| 6  | 2.572838000  | 12.483944000 | 0.201223000  |
| 1  | 2.796808000  | 12.051145000 | -0.787338000 |
| 1  | 2.152376000  | 13.481313000 | 0.029039000  |
| 6  | 1.467290000  | 11.632393000 | 0.879831000  |
| 6  | 0.256050000  | 11.619756000 | -0.084467000 |
| 1  | -0.562443000 | 11.028443000 | 0.341803000  |
| 1  | 0.523738000  | 11.178185000 | -1.052407000 |
| 1  | -0.118075000 | 12.635488000 | -0.263247000 |
| 6  | 1.047031000  | 12.278312000 | 2.218638000  |
| 1  | 1.889347000  | 12.332564000 | 2.915105000  |
| 1  | 0.247933000  | 11.694372000 | 2.691005000  |
| 1  | 0.671119000  | 13.296600000 | 2.057231000  |
| 6  | 1.941919000  | 10.178615000 | 1.106374000  |
| 1  | 2.789000000  | 10.123306000 | 1.797516000  |
| 1  | 2.244153000  | 9.716819000  | 0.157724000  |
| 1  | 1.126445000  | 9.578023000  | 1.527500000  |
| 6  | 8.955147000  | 13.365111000 | 4.159209000  |
| 1  | 9.513380000  | 14.162923000 | 4.661473000  |
| 1  | 9.573339000  | 12.972295000 | 3.351184000  |
| 6  | 8.626762000  | 12.167186000 | 5.103973000  |
| 6  | 8.221642000  | 12.585189000 | 6.538655000  |
| 6  | 7.219461000  | 11.865103000 | 7.209368000  |
| 1  | 6.699446000  | 11.080296000 | 6.674299000  |
| 6  | 6.891721000  | 12.160088000 | 8.537521000  |
| 1  | 6.114921000  | 11.590191000 | 9.038086000  |
| 6  | 7.558476000  | 13.185311000 | 9.219862000  |
| 1  | 7.303274000  | 13.416107000 | 10.249236000 |
| 6  | 8.561574000  | 13.906552000 | 8.562377000  |
| 1  | 9.090886000  | 14.700742000 | 9.079861000  |
| 6  | 8.894581000  | 13.604445000 | 7.235796000  |

|   |              |              |             |
|---|--------------|--------------|-------------|
| 1 | 9.692638000  | 14.166762000 | 6.762497000 |
| 6 | 9.863550000  | 11.243846000 | 5.219818000 |
| 6 | 11.160044000 | 11.765759000 | 5.377067000 |
| 1 | 11.325572000 | 12.838143000 | 5.394183000 |
| 6 | 12.260827000 | 10.911704000 | 5.518255000 |
| 1 | 13.254858000 | 11.332615000 | 5.633779000 |
| 6 | 12.081507000 | 9.523231000  | 5.512027000 |
| 1 | 12.934300000 | 8.861253000  | 5.624185000 |
| 6 | 10.792785000 | 8.997010000  | 5.358820000 |
| 1 | 10.641718000 | 7.921839000  | 5.352106000 |
| 6 | 9.693041000  | 9.850716000  | 5.211254000 |
| 1 | 8.696648000  | 9.448400000  | 5.078121000 |
| 7 | 3.638354000  | 11.452543000 | 4.870251000 |
| 1 | 4.142941000  | 11.036284000 | 4.070401000 |
| 7 | 5.198208000  | 13.179059000 | 4.639312000 |
| 7 | 7.723646000  | 13.925005000 | 3.516441000 |
| 7 | 5.837790000  | 13.650167000 | 1.554226000 |
| 7 | 3.804818000  | 12.624943000 | 0.987183000 |
| 1 | 4.113626000  | 11.859642000 | 1.602407000 |
| 8 | 7.552962000  | 11.442058000 | 4.483333000 |
| 6 | 8.111552000  | 6.591912000  | 2.658997000 |
| 6 | 6.738323000  | 6.671811000  | 2.306251000 |
| 6 | 5.775639000  | 5.834558000  | 2.954053000 |
| 6 | 4.427798000  | 5.882223000  | 2.612386000 |
| 1 | 3.720981000  | 5.231123000  | 3.117900000 |
| 1 | 6.116893000  | 5.147581000  | 3.723665000 |
| 6 | 6.254003000  | 7.563836000  | 1.296630000 |
| 1 | 6.951294000  | 8.215258000  | 0.781277000 |
| 6 | 4.901067000  | 7.600403000  | 0.962440000 |
| 1 | 4.560325000  | 8.276927000  | 0.184319000 |
| 6 | 3.976253000  | 6.763802000  | 1.613114000 |
| 1 | 2.925758000  | 6.795789000  | 1.343839000 |
| 1 | 8.386871000  | 5.873192000  | 3.428142000 |
| 6 | 9.208581000  | 7.384577000  | 2.016279000 |
| 1 | 10.136450000 | 7.307428000  | 2.590128000 |
| 1 | 9.426006000  | 7.028505000  | 0.995366000 |
| 1 | 8.956745000  | 8.450092000  | 1.925353000 |

<sup>5</sup>TS<sub>OH,1Cl,PM<sup>-</sup></sub>

|    |             |              |             |
|----|-------------|--------------|-------------|
| 26 | 6.800733000 | 12.285618000 | 3.471859000 |
| 8  | 5.675449000 | 10.629476000 | 3.307167000 |
| 1  | 5.759835000 | 10.003488000 | 4.052707000 |
| 6  | 3.512721000 | 8.989672000  | 6.259180000 |
| 1  | 4.534655000 | 9.373012000  | 6.156745000 |
| 1  | 3.231922000 | 8.500519000  | 5.317930000 |
| 1  | 3.520971000 | 8.227074000  | 7.046924000 |
| 6  | 1.105312000 | 9.537030000  | 6.788700000 |
| 1  | 1.092615000 | 8.792400000  | 7.593214000 |
| 1  | 0.764811000 | 9.045459000  | 5.868569000 |
| 1  | 0.381556000 | 10.321566000 | 7.043600000 |
| 6  | 2.971563000 | 10.799759000 | 7.930516000 |
| 1  | 3.961800000 | 11.256369000 | 7.824347000 |
| 1  | 3.026150000 | 10.060014000 | 8.738650000 |
| 1  | 2.264033000 | 11.579608000 | 8.237893000 |
| 6  | 2.525921000 | 10.123543000 | 6.615744000 |
| 6  | 2.460749000 | 11.157771000 | 5.448478000 |
| 1  | 2.098823000 | 10.633651000 | 4.555246000 |
| 1  | 1.712907000 | 11.922611000 | 5.684442000 |
| 6  | 4.161176000 | 13.028879000 | 5.477821000 |
| 6  | 3.389858000 | 13.902846000 | 6.286202000 |
| 1  | 2.422824000 | 13.595356000 | 6.657372000 |
| 6  | 3.888079000 | 15.161054000 | 6.588220000 |
| 1  | 3.298849000 | 15.842929000 | 7.192530000 |
| 6  | 5.148666000 | 15.547627000 | 6.114924000 |
| 1  | 5.561059000 | 16.523069000 | 6.344266000 |
| 6  | 5.881471000 | 14.635805000 | 5.352557000 |
| 6  | 7.295871000 | 15.009928000 | 4.957291000 |
| 1  | 7.316796000 | 16.073342000 | 4.682475000 |
| 1  | 7.917373000 | 14.911476000 | 5.850837000 |
| 6  | 7.839225000 | 14.900764000 | 2.554432000 |
| 1  | 8.475716000 | 14.347118000 | 1.857210000 |
| 1  | 8.210223000 | 15.932396000 | 2.630413000 |
| 6  | 6.430466000 | 14.891524000 | 2.005242000 |
| 6  | 5.878803000 | 16.007371000 | 1.386208000 |
| 1  | 6.432986000 | 16.936238000 | 1.334004000 |

|    |              |              |              |
|----|--------------|--------------|--------------|
| 6  | 4.585071000  | 15.893894000 | 0.848559000  |
| 1  | 4.113696000  | 16.751306000 | 0.379878000  |
| 6  | 3.901266000  | 14.691100000 | 0.918878000  |
| 1  | 2.901661000  | 14.613676000 | 0.516388000  |
| 6  | 4.522864000  | 13.568803000 | 1.535391000  |
| 6  | 2.616165000  | 12.009034000 | 1.067636000  |
| 1  | 2.376050000  | 12.709202000 | 0.262739000  |
| 1  | 1.854420000  | 12.141606000 | 1.852283000  |
| 6  | 2.488216000  | 10.574209000 | 0.483147000  |
| 6  | 1.051674000  | 10.439823000 | -0.077313000 |
| 1  | 0.896787000  | 9.436471000  | -0.490571000 |
| 1  | 0.868657000  | 11.167229000 | -0.877878000 |
| 1  | 0.303340000  | 10.600556000 | 0.708846000  |
| 6  | 2.698401000  | 9.507883000  | 1.583291000  |
| 1  | 3.689730000  | 9.577620000  | 2.042613000  |
| 1  | 2.592165000  | 8.502229000  | 1.158330000  |
| 1  | 1.945085000  | 9.616281000  | 2.374327000  |
| 6  | 3.505668000  | 10.376198000 | -0.662310000 |
| 1  | 4.533813000  | 10.504184000 | -0.309063000 |
| 1  | 3.332989000  | 11.102225000 | -1.466773000 |
| 1  | 3.411659000  | 9.370197000  | -1.088166000 |
| 6  | 9.290242000  | 13.709735000 | 4.204026000  |
| 1  | 9.903040000  | 14.513050000 | 4.634931000  |
| 1  | 9.743762000  | 13.406187000 | 3.260615000  |
| 6  | 9.247636000  | 12.440874000 | 5.133787000  |
| 6  | 9.016535000  | 12.802885000 | 6.617434000  |
| 6  | 8.078060000  | 12.080017000 | 7.370239000  |
| 1  | 7.518496000  | 11.298106000 | 6.873454000  |
| 6  | 7.865115000  | 12.366046000 | 8.724833000  |
| 1  | 7.132560000  | 11.793604000 | 9.286385000  |
| 6  | 8.590127000  | 13.384435000 | 9.354833000  |
| 1  | 8.423807000  | 13.609895000 | 10.403572000 |
| 6  | 9.537262000  | 14.107969000 | 8.618657000  |
| 1  | 10.112165000 | 14.896021000 | 9.095541000  |
| 6  | 9.750444000  | 13.816676000 | 7.265349000  |
| 1  | 10.502212000 | 14.379554000 | 6.720421000  |
| 6  | 10.586409000 | 11.666485000 | 4.956985000  |
| 6  | 10.874630000 | 11.116159000 | 3.691123000  |
| 1  | 10.165064000 | 11.248904000 | 2.881005000  |
| 6  | 12.049753000 | 10.391347000 | 3.471447000  |
| 1  | 12.249518000 | 9.979728000  | 2.486265000  |
| 6  | 12.964678000 | 10.190081000 | 4.514537000  |
| 1  | 13.876697000 | 9.626062000  | 4.344463000  |
| 6  | 12.685994000 | 10.721218000 | 5.776893000  |
| 1  | 13.380215000 | 10.569402000 | 6.598178000  |
| 6  | 11.507932000 | 11.451221000 | 5.995597000  |
| 1  | 11.315894000 | 11.847202000 | 6.984844000  |
| 7  | 3.728113000  | 11.793152000 | 5.091909000  |
| 1  | 4.321631000  | 11.316577000 | 4.411772000  |
| 7  | 5.406430000  | 13.407728000 | 5.025762000  |
| 7  | 7.914663000  | 14.200803000 | 3.870849000  |
| 7  | 5.762863000  | 13.708033000 | 2.103231000  |
| 7  | 3.948840000  | 12.331012000 | 1.588844000  |
| 1  | 4.455556000  | 11.607439000 | 2.100273000  |
| 8  | 8.173898000  | 11.611293000 | 4.657330000  |
| 6  | 6.980108000  | 8.671314000  | 2.516696000  |
| 6  | 6.939934000  | 7.893079000  | 3.715515000  |
| 6  | 7.653703000  | 8.355368000  | 4.863038000  |
| 6  | 7.648821000  | 7.614401000  | 6.042736000  |
| 6  | 6.942961000  | 6.402354000  | 6.114781000  |
| 6  | 6.228763000  | 5.935380000  | 4.997329000  |
| 6  | 6.218458000  | 6.668409000  | 3.814377000  |
| 1  | 5.683363000  | 4.999487000  | 5.057419000  |
| 1  | 8.192535000  | 7.976516000  | 6.909040000  |
| 1  | 8.167342000  | 9.313486000  | 4.809617000  |
| 1  | 5.666397000  | 6.296380000  | 2.958750000  |
| 6  | 6.362902000  | 8.266767000  | 1.224981000  |
| 17 | 8.186972000  | 11.742525000 | 1.184235000  |
| 1  | 7.671442000  | 9.504567000  | 2.474183000  |
| 1  | 6.286608000  | 9.124949000  | 0.556264000  |
| 1  | 7.005536000  | 7.521295000  | 0.726481000  |
| 1  | 5.374904000  | 7.812099000  | 1.339777000  |
| 1  | 6.945407000  | 5.826053000  | 7.034122000  |

<sup>5</sup>P<sub>OH,1Cl,PM</sub>:



|    |              |              |              |
|----|--------------|--------------|--------------|
| 26 | 7.085694000  | 12.421416000 | 3.614690000  |
| 8  | 4.752301000  | 7.366073000  | 3.280374000  |
| 1  | 5.354247000  | 8.130749000  | 3.123122000  |
| 6  | 4.625402000  | 8.585895000  | 6.596156000  |
| 1  | 5.494069000  | 9.254508000  | 6.625295000  |
| 1  | 4.697581000  | 7.963812000  | 5.696519000  |
| 1  | 4.677990000  | 7.931146000  | 7.474807000  |
| 6  | 2.105384000  | 8.414691000  | 6.614474000  |
| 1  | 2.125113000  | 7.788401000  | 7.514067000  |
| 1  | 2.132996000  | 7.752107000  | 5.740680000  |
| 1  | 1.151526000  | 8.957815000  | 6.602643000  |
| 6  | 3.253872000  | 10.280529000 | 7.870019000  |
| 1  | 4.079458000  | 11.000779000 | 7.883302000  |
| 1  | 3.335558000  | 9.661705000  | 8.772117000  |
| 1  | 2.309426000  | 10.835882000 | 7.929790000  |
| 6  | 3.306019000  | 9.390677000  | 6.609146000  |
| 6  | 3.190618000  | 10.244712000 | 5.307235000  |
| 1  | 3.143269000  | 9.554558000  | 4.457431000  |
| 1  | 2.249760000  | 10.805971000 | 5.318475000  |
| 6  | 4.389539000  | 12.479674000 | 5.360181000  |
| 6  | 3.338310000  | 13.201697000 | 5.985004000  |
| 1  | 2.407409000  | 12.709383000 | 6.226526000  |
| 6  | 3.525452000  | 14.540621000 | 6.286109000  |
| 1  | 2.723580000  | 15.102570000 | 6.753097000  |
| 6  | 4.752110000  | 15.166911000 | 6.005591000  |
| 1  | 4.925428000  | 16.203886000 | 6.265843000  |
| 6  | 5.754149000  | 14.415481000 | 5.399281000  |
| 6  | 7.144559000  | 15.005349000 | 5.241181000  |
| 1  | 7.066620000  | 16.091396000 | 5.098267000  |
| 1  | 7.665377000  | 14.847936000 | 6.190946000  |
| 6  | 7.929558000  | 15.183516000 | 2.897467000  |
| 1  | 8.722100000  | 14.799281000 | 2.246220000  |
| 1  | 8.135939000  | 16.247697000 | 3.079287000  |
| 6  | 6.612020000  | 15.036476000 | 2.175375000  |
| 6  | 5.983932000  | 16.147969000 | 1.629671000  |
| 1  | 6.401371000  | 17.136225000 | 1.775715000  |
| 6  | 4.802952000  | 15.954167000 | 0.893137000  |
| 1  | 4.279011000  | 16.802524000 | 0.466261000  |
| 6  | 4.308814000  | 14.676495000 | 0.710931000  |
| 1  | 3.401959000  | 14.517985000 | 0.145930000  |
| 6  | 4.996358000  | 13.565199000 | 1.281493000  |
| 6  | 3.411124000  | 11.994259000 | 0.204744000  |
| 1  | 3.555983000  | 12.505255000 | -0.757950000 |
| 1  | 2.489987000  | 12.398670000 | 0.650681000  |
| 6  | 3.192721000  | 10.487330000 | -0.084764000 |
| 6  | 1.986099000  | 10.395775000 | -1.051608000 |
| 1  | 1.774078000  | 9.348040000  | -1.292599000 |
| 1  | 2.188579000  | 10.925470000 | -1.990524000 |
| 1  | 1.084068000  | 10.828402000 | -0.601198000 |
| 6  | 2.855130000  | 9.717256000  | 1.211857000  |
| 1  | 3.696129000  | 9.700580000  | 1.910971000  |
| 1  | 2.603537000  | 8.676338000  | 0.975754000  |
| 1  | 1.990905000  | 10.166235000 | 1.717442000  |
| 6  | 4.437130000  | 9.873508000  | -0.768240000 |
| 1  | 5.315664000  | 9.897436000  | -0.115035000 |
| 1  | 4.680461000  | 10.412463000 | -1.692465000 |
| 1  | 4.243994000  | 8.825989000  | -1.029483000 |
| 6  | 9.384106000  | 14.090708000 | 4.581089000  |
| 1  | 9.791559000  | 14.896079000 | 5.204762000  |
| 1  | 9.981492000  | 14.051197000 | 3.668207000  |
| 6  | 9.509593000  | 12.677752000 | 5.249910000  |
| 6  | 9.154424000  | 12.657171000 | 6.759730000  |
| 6  | 8.524778000  | 11.515037000 | 7.285207000  |
| 1  | 8.267436000  | 10.714006000 | 6.603332000  |
| 6  | 8.229812000  | 11.416094000 | 8.649305000  |
| 1  | 7.743490000  | 10.523084000 | 9.030579000  |
| 6  | 8.557931000  | 12.462586000 | 9.521182000  |
| 1  | 8.326557000  | 12.389458000 | 10.579182000 |
| 6  | 9.189103000  | 13.603573000 | 9.013555000  |
| 1  | 9.450701000  | 14.422532000 | 9.676813000  |
| 6  | 9.488823000  | 13.697464000 | 7.647209000  |
| 1  | 9.985816000  | 14.593211000 | 7.288965000  |
| 6  | 10.982941000 | 12.213288000 | 5.089750000  |
| 6  | 11.260164000 | 11.021959000 | 4.401910000  |
| 1  | 10.425563000 | 10.454919000 | 4.009171000  |

|    |              |              |              |
|----|--------------|--------------|--------------|
| 6  | 12.579777000 | 10.585056000 | 4.229536000  |
| 1  | 12.773703000 | 9.658052000  | 3.697803000  |
| 6  | 13.645622000 | 11.337986000 | 4.736743000  |
| 1  | 14.668926000 | 11.001423000 | 4.602018000  |
| 6  | 13.379376000 | 12.530415000 | 5.422119000  |
| 1  | 14.196873000 | 13.123424000 | 5.821285000  |
| 6  | 12.059423000 | 12.962092000 | 5.600134000  |
| 1  | 11.879321000 | 13.881778000 | 6.146959000  |
| 7  | 4.307155000  | 11.157315000 | 5.044947000  |
| 1  | 5.098063000  | 10.766228000 | 4.542743000  |
| 7  | 5.568015000  | 13.113477000 | 5.042082000  |
| 7  | 7.979500000  | 14.400722000 | 4.163145000  |
| 7  | 6.128130000  | 13.763095000 | 2.039148000  |
| 7  | 4.556073000  | 12.294354000 | 1.076872000  |
| 1  | 5.084056000  | 11.531204000 | 1.491633000  |
| 8  | 8.650195000  | 11.796871000 | 4.534301000  |
| 6  | 4.875436000  | 6.390520000  | 2.196573000  |
| 6  | 6.279977000  | 5.809670000  | 2.106339000  |
| 6  | 6.807152000  | 5.429491000  | 0.861030000  |
| 6  | 8.077780000  | 4.848271000  | 0.770855000  |
| 6  | 8.840574000  | 4.646455000  | 1.928303000  |
| 6  | 8.324836000  | 5.029729000  | 3.173597000  |
| 6  | 7.052302000  | 5.606122000  | 3.261857000  |
| 1  | 8.913460000  | 4.881819000  | 4.073897000  |
| 1  | 8.473333000  | 4.561720000  | -0.198768000 |
| 1  | 6.222800000  | 5.592834000  | -0.040994000 |
| 1  | 6.654297000  | 5.914106000  | 4.222559000  |
| 6  | 3.818304000  | 5.319242000  | 2.476971000  |
| 17 | 6.519970000  | 10.095889000 | 2.674631000  |
| 1  | 4.639431000  | 6.883841000  | 1.242480000  |
| 1  | 2.824661000  | 5.775979000  | 2.529231000  |
| 1  | 3.818307000  | 4.562898000  | 1.685589000  |
| 1  | 4.027759000  | 4.824818000  | 3.431617000  |
| 1  | 9.828183000  | 4.201147000  | 1.860057000  |

<sup>5</sup>TS<sub>Cl,1Cl,PM:</sub>

|    |              |              |              |
|----|--------------|--------------|--------------|
| 26 | 6.266910000  | 11.990751000 | 3.533245000  |
| 17 | 7.707187000  | 10.936411000 | 1.572601000  |
| 8  | 4.771760000  | 10.735106000 | 3.185020000  |
| 1  | 5.012974000  | 9.825345000  | 2.930258000  |
| 6  | 2.829604000  | 9.010829000  | 6.205660000  |
| 1  | 3.856298000  | 9.290439000  | 5.943546000  |
| 1  | 2.360847000  | 8.565147000  | 5.318721000  |
| 1  | 2.874723000  | 8.241737000  | 6.986339000  |
| 6  | 0.574328000  | 9.815002000  | 7.011358000  |
| 1  | 0.557139000  | 9.037810000  | 7.784558000  |
| 1  | 0.077982000  | 9.414091000  | 6.118474000  |
| 1  | -0.015004000 | 10.666445000 | 7.375002000  |
| 6  | 2.688192000  | 10.811669000 | 7.970808000  |
| 1  | 3.711951000  | 11.144205000 | 7.766347000  |
| 1  | 2.730321000  | 10.047980000 | 8.757117000  |
| 1  | 2.120963000  | 11.665593000 | 8.361372000  |
| 6  | 2.028333000  | 10.237514000 | 6.698535000  |
| 6  | 1.971717000  | 11.316432000 | 5.571869000  |
| 1  | 1.482723000  | 10.866493000 | 4.698052000  |
| 1  | 1.329405000  | 12.141056000 | 5.897414000  |
| 6  | 3.814796000  | 13.027996000 | 5.468545000  |
| 6  | 3.160938000  | 13.991274000 | 6.284802000  |
| 1  | 2.180793000  | 13.786888000 | 6.691335000  |
| 6  | 3.791526000  | 15.194826000 | 6.556540000  |
| 1  | 3.290380000  | 15.938544000 | 7.167668000  |
| 6  | 5.077243000  | 15.445515000 | 6.055919000  |
| 1  | 5.598886000  | 16.368624000 | 6.279414000  |
| 6  | 5.690100000  | 14.458513000 | 5.283440000  |
| 6  | 7.138095000  | 14.666648000 | 4.879176000  |
| 1  | 7.261553000  | 15.697518000 | 4.522975000  |
| 1  | 7.740547000  | 14.580718000 | 5.788813000  |
| 6  | 7.843352000  | 14.369003000 | 2.533520000  |
| 1  | 8.446296000  | 13.698093000 | 1.913203000  |
| 1  | 8.372950000  | 15.328614000 | 2.614895000  |
| 6  | 6.507552000  | 14.561889000 | 1.856110000  |
| 6  | 6.227838000  | 15.702333000 | 1.109460000  |
| 1  | 6.941659000  | 16.515492000 | 1.061291000  |
| 6  | 4.998877000  | 15.762552000 | 0.429325000  |
| 1  | 4.738098000  | 16.644415000 | -0.146663000 |

|   |              |              |              |
|---|--------------|--------------|--------------|
| 6 | 4.114562000  | 14.698218000 | 0.494528000  |
| 1 | 3.163376000  | 14.744077000 | -0.017467000 |
| 6 | 4.459078000  | 13.546024000 | 1.259767000  |
| 6 | 2.455420000  | 12.284773000 | 0.519789000  |
| 1 | 2.639278000  | 12.691247000 | -0.484370000 |
| 1 | 1.623129000  | 12.864466000 | 0.951779000  |
| 6 | 1.995611000  | 10.810737000 | 0.352787000  |
| 6 | 0.780040000  | 10.821147000 | -0.605250000 |
| 1 | 0.397744000  | 9.803425000  | -0.745514000 |
| 1 | 1.054834000  | 11.218535000 | -1.590153000 |
| 1 | -0.035208000 | 11.435920000 | -0.203647000 |
| 6 | 1.562566000  | 10.208576000 | 1.709863000  |
| 1 | 2.400694000  | 10.158376000 | 2.411954000  |
| 1 | 1.179378000  | 9.190785000  | 1.566239000  |
| 1 | 0.763816000  | 10.808782000 | 2.164031000  |
| 6 | 3.127526000  | 9.958691000  | -0.266014000 |
| 1 | 4.001566000  | 9.915475000  | 0.391725000  |
| 1 | 3.446302000  | 10.372487000 | -1.230967000 |
| 1 | 2.781034000  | 8.931993000  | -0.435006000 |
| 6 | 8.943085000  | 13.035448000 | 4.315630000  |
| 1 | 9.651351000  | 13.762733000 | 4.735245000  |
| 1 | 9.386403000  | 12.590162000 | 3.424078000  |
| 6 | 8.632708000  | 11.865322000 | 5.313540000  |
| 6 | 8.495219000  | 12.356032000 | 6.781662000  |
| 6 | 7.337988000  | 12.049610000 | 7.513909000  |
| 1 | 6.551103000  | 11.498769000 | 7.015139000  |
| 6 | 7.203936000  | 12.457739000 | 8.847494000  |
| 1 | 6.300013000  | 12.210355000 | 9.396610000  |
| 6 | 8.226457000  | 13.181947000 | 9.471440000  |
| 1 | 8.123071000  | 13.500211000 | 10.504181000 |
| 6 | 9.388337000  | 13.489901000 | 8.750919000  |
| 1 | 10.191249000 | 14.047008000 | 9.224390000  |
| 6 | 9.522572000  | 13.076107000 | 7.420451000  |
| 1 | 10.439502000 | 13.309482000 | 6.888044000  |
| 6 | 9.784437000  | 10.829577000 | 5.268995000  |
| 6 | 11.125203000 | 11.189572000 | 5.045416000  |
| 1 | 11.397334000 | 12.225133000 | 4.869062000  |
| 6 | 12.136884000 | 10.218999000 | 5.038376000  |
| 1 | 13.165160000 | 10.518088000 | 4.858634000  |
| 6 | 11.825544000 | 8.872902000  | 5.258843000  |
| 1 | 12.608990000 | 8.121567000  | 5.253741000  |
| 6 | 10.492131000 | 8.504239000  | 5.484411000  |
| 1 | 10.237995000 | 7.462471000  | 5.656386000  |
| 6 | 9.483511000  | 9.474123000  | 5.487678000  |
| 1 | 8.449115000  | 9.196977000  | 5.651066000  |
| 7 | 3.270517000  | 11.825707000 | 5.138072000  |
| 1 | 3.801051000  | 11.255063000 | 4.451938000  |
| 7 | 5.073355000  | 13.293479000 | 4.964763000  |
| 7 | 7.691964000  | 13.720457000 | 3.866754000  |
| 7 | 5.642292000  | 13.518522000 | 1.959954000  |
| 7 | 3.670323000  | 12.441523000 | 1.322322000  |
| 1 | 3.985597000  | 11.686008000 | 1.958545000  |
| 8 | 7.421739000  | 11.249060000 | 4.888360000  |
| 6 | 8.383376000  | 8.334040000  | 1.452582000  |
| 6 | 7.134097000  | 7.656348000  | 1.611406000  |
| 6 | 6.572396000  | 7.526747000  | 2.915100000  |
| 6 | 5.361175000  | 6.869268000  | 3.110840000  |
| 1 | 4.949568000  | 6.779166000  | 4.110619000  |
| 1 | 7.105043000  | 7.953500000  | 3.759158000  |
| 6 | 6.421253000  | 7.090814000  | 0.517388000  |
| 1 | 6.822316000  | 7.170931000  | -0.486471000 |
| 6 | 5.212213000  | 6.429791000  | 0.722981000  |
| 1 | 4.683516000  | 5.999982000  | -0.121355000 |
| 6 | 4.673881000  | 6.317444000  | 2.015432000  |
| 1 | 3.731002000  | 5.803296000  | 2.168634000  |
| 1 | 8.907336000  | 8.601602000  | 2.363800000  |
| 6 | 9.172802000  | 8.373420000  | 0.185765000  |
| 1 | 9.680871000  | 7.407009000  | 0.030746000  |
| 1 | 8.551575000  | 8.556273000  | -0.695902000 |
| 1 | 9.942864000  | 9.145662000  | 0.231495000  |

<sup>5</sup>P<sub>Cl,1Cl,PM:</sub>

|    |             |              |             |
|----|-------------|--------------|-------------|
| 26 | 6.062662000 | 11.767893000 | 3.524816000 |
| 17 | 7.223571000 | 9.517771000  | 0.190473000 |
| 8  | 4.511865000 | 10.566177000 | 3.101159000 |

|   |              |              |              |
|---|--------------|--------------|--------------|
| 1 | 4.668078000  | 9.609631000  | 2.994187000  |
| 6 | 2.546515000  | 9.062804000  | 6.193137000  |
| 1 | 3.592605000  | 9.258574000  | 5.931838000  |
| 1 | 2.040308000  | 8.672604000  | 5.300903000  |
| 1 | 2.527624000  | 8.281420000  | 6.962525000  |
| 6 | 0.370030000  | 10.037121000 | 7.024648000  |
| 1 | 0.294202000  | 9.260510000  | 7.794875000  |
| 1 | -0.160007000 | 9.680402000  | 6.132413000  |
| 1 | -0.148630000 | 10.930933000 | 7.394175000  |
| 6 | 2.563181000  | 10.848298000 | 7.980522000  |
| 1 | 3.606357000  | 11.110015000 | 7.771375000  |
| 1 | 2.557023000  | 10.070406000 | 8.753973000  |
| 1 | 2.063324000  | 11.734235000 | 8.391515000  |
| 6 | 1.851584000  | 10.344567000 | 6.706249000  |
| 6 | 1.875621000  | 11.438033000 | 5.592565000  |
| 1 | 1.340519000  | 11.043285000 | 4.719133000  |
| 1 | 1.311926000  | 12.312311000 | 5.934501000  |
| 6 | 3.867641000  | 12.975587000 | 5.498260000  |
| 6 | 3.318137000  | 13.989134000 | 6.329973000  |
| 1 | 2.328263000  | 13.876999000 | 6.749022000  |
| 6 | 4.062108000  | 15.128854000 | 6.593909000  |
| 1 | 3.640164000  | 15.912385000 | 7.215042000  |
| 6 | 5.357020000  | 15.268599000 | 6.070113000  |
| 1 | 5.959501000  | 16.143914000 | 6.282291000  |
| 6 | 5.866910000  | 14.231601000 | 5.289542000  |
| 6 | 7.322379000  | 14.279424000 | 4.859695000  |
| 1 | 7.580873000  | 15.309763000 | 4.578471000  |
| 1 | 7.922423000  | 14.037868000 | 5.742883000  |
| 6 | 7.802776000  | 14.014990000 | 2.445324000  |
| 1 | 8.369350000  | 13.353753000 | 1.780407000  |
| 1 | 8.358047000  | 14.961593000 | 2.517677000  |
| 6 | 6.456075000  | 14.259852000 | 1.804176000  |
| 6 | 6.201155000  | 15.435567000 | 1.105200000  |
| 1 | 6.932854000  | 16.234075000 | 1.090004000  |
| 6 | 4.978316000  | 15.547737000 | 0.419339000  |
| 1 | 4.742081000  | 16.454686000 | -0.127652000 |
| 6 | 4.071713000  | 14.501722000 | 0.440794000  |
| 1 | 3.126751000  | 14.584035000 | -0.078279000 |
| 6 | 4.381753000  | 13.317946000 | 1.173843000  |
| 6 | 2.317648000  | 12.168419000 | 0.431094000  |
| 1 | 2.521404000  | 12.516567000 | -0.591891000 |
| 1 | 1.548188000  | 12.839128000 | 0.848301000  |
| 6 | 1.722175000  | 10.737601000 | 0.333967000  |
| 6 | 0.494331000  | 10.820527000 | -0.604645000 |
| 1 | 0.021117000  | 9.836312000  | -0.699838000 |
| 1 | 0.784268000  | 11.155296000 | -1.608364000 |
| 1 | -0.255820000 | 11.519727000 | -0.214197000 |
| 6 | 1.263050000  | 10.234388000 | 1.722798000  |
| 1 | 2.107172000  | 10.143278000 | 2.413603000  |
| 1 | 0.790515000  | 9.248672000  | 1.630050000  |
| 1 | 0.526876000  | 10.920813000 | 2.160725000  |
| 6 | 2.759599000  | 9.760341000  | -0.265329000 |
| 1 | 3.639189000  | 9.665760000  | 0.379449000  |
| 1 | 3.095206000  | 10.102699000 | -1.252236000 |
| 1 | 2.317619000  | 8.763624000  | -0.384669000 |
| 6 | 8.956658000  | 12.559583000 | 4.086029000  |
| 1 | 9.693785000  | 13.200188000 | 4.588627000  |
| 1 | 9.383168000  | 12.241404000 | 3.132646000  |
| 6 | 8.647805000  | 11.257993000 | 4.894816000  |
| 6 | 8.413190000  | 11.550114000 | 6.403479000  |
| 6 | 7.246377000  | 11.099068000 | 7.037549000  |
| 1 | 6.510002000  | 10.573071000 | 6.443573000  |
| 6 | 7.038347000  | 11.326214000 | 8.404943000  |
| 1 | 6.128601000  | 10.966753000 | 8.877187000  |
| 6 | 7.996110000  | 12.010595000 | 9.161803000  |
| 1 | 7.835014000  | 12.188902000 | 10.220455000 |
| 6 | 9.170967000  | 12.457401000 | 8.541277000  |
| 1 | 9.926533000  | 12.981564000 | 9.118875000  |
| 6 | 9.379142000  | 12.222586000 | 7.177458000  |
| 1 | 10.307606000 | 12.553704000 | 6.721388000  |
| 6 | 9.848759000  | 10.282023000 | 4.809911000  |
| 6 | 11.162275000 | 10.694184000 | 4.524153000  |
| 1 | 11.384431000 | 11.736170000 | 4.321380000  |
| 6 | 12.216909000 | 9.769288000  | 4.496003000  |
| 1 | 13.222341000 | 10.110946000 | 4.268991000  |

|   |              |              |             |
|---|--------------|--------------|-------------|
| 6 | 11.977640000 | 8.417137000  | 4.758888000 |
| 1 | 12.793723000 | 7.701663000  | 4.739468000 |
| 6 | 10.671719000 | 7.995278000  | 5.049125000 |
| 1 | 10.472720000 | 6.948197000  | 5.257668000 |
| 6 | 9.622176000  | 8.918594000  | 5.073297000 |
| 1 | 8.612393000  | 8.591207000  | 5.288591000 |
| 7 | 3.209712000  | 11.836085000 | 5.147882000 |
| 1 | 3.666892000  | 11.232541000 | 4.434973000 |
| 7 | 5.141288000  | 13.125240000 | 4.990064000 |
| 7 | 7.718622000  | 13.339281000 | 3.771192000 |
| 7 | 5.569371000  | 13.230346000 | 1.866905000 |
| 7 | 3.552054000  | 12.244899000 | 1.214747000 |
| 1 | 3.827732000  | 11.470829000 | 1.855565000 |
| 8 | 7.495136000  | 10.655346000 | 4.302571000 |
| 6 | 8.003254000  | 8.470898000  | 1.706911000 |
| 6 | 7.011131000  | 7.425183000  | 2.112663000 |
| 6 | 6.331950000  | 7.582579000  | 3.337294000 |
| 6 | 5.425608000  | 6.607895000  | 3.774153000 |
| 1 | 4.914142000  | 6.734185000  | 4.723289000 |
| 1 | 6.540369000  | 8.461240000  | 3.942766000 |
| 6 | 6.759608000  | 6.281885000  | 1.332003000 |
| 1 | 7.263361000  | 6.153681000  | 0.379428000 |
| 6 | 5.849112000  | 5.314732000  | 1.767420000 |
| 1 | 5.659962000  | 4.438436000  | 1.155765000 |
| 6 | 5.180512000  | 5.474249000  | 2.989949000 |
| 1 | 4.476020000  | 4.720193000  | 3.326120000 |
| 1 | 8.072179000  | 9.255415000  | 2.461717000 |
| 6 | 9.360119000  | 7.989033000  | 1.230389000 |
| 1 | 9.854704000  | 7.475988000  | 2.064755000 |
| 1 | 9.281935000  | 7.288773000  | 0.394290000 |
| 1 | 9.989575000  | 8.829069000  | 0.926407000 |

<sup>5</sup>Re<sub>1Br,PM</sub>:

|    |             |              |              |
|----|-------------|--------------|--------------|
| 26 | 6.383961000 | 12.420214000 | 3.696246000  |
| 8  | 4.904659000 | 11.178887000 | 3.605170000  |
| 1  | 5.107846000 | 10.233896000 | 3.475763000  |
| 6  | 3.070263000 | 9.687818000  | 6.658888000  |
| 1  | 4.082117000 | 9.936619000  | 6.319179000  |
| 1  | 2.524010000 | 9.251017000  | 5.812966000  |
| 1  | 3.153191000 | 8.921469000  | 7.438817000  |
| 6  | 0.909071000 | 10.549493000 | 7.642584000  |
| 1  | 0.942155000 | 9.788366000  | 8.430952000  |
| 1  | 0.334701000 | 10.139861000 | 6.802060000  |
| 1  | 0.366219000 | 11.418799000 | 8.034954000  |
| 6  | 3.116705000 | 11.508811000 | 8.409641000  |
| 1  | 4.120057000 | 11.834545000 | 8.113946000  |
| 1  | 3.224906000 | 10.746233000 | 9.190624000  |
| 1  | 2.592770000 | 12.366791000 | 8.849141000  |
| 6  | 2.340194000 | 10.936935000 | 7.203713000  |
| 6  | 2.209823000 | 12.005876000 | 6.075350000  |
| 1  | 1.613444000 | 11.569533000 | 5.263488000  |
| 1  | 1.642404000 | 12.862651000 | 6.451670000  |
| 6  | 4.102725000 | 13.635235000 | 5.727945000  |
| 6  | 3.615091000 | 14.607627000 | 6.643746000  |
| 1  | 2.704687000 | 14.422375000 | 7.194872000  |
| 6  | 4.326166000 | 15.776927000 | 6.845751000  |
| 1  | 3.958748000 | 16.516459000 | 7.549349000  |
| 6  | 5.527186000 | 15.996107000 | 6.155248000  |
| 1  | 6.112977000 | 16.893250000 | 6.313276000  |
| 6  | 5.962611000 | 15.023923000 | 5.258993000  |
| 6  | 7.221291000 | 15.299089000 | 4.464450000  |
| 1  | 6.970861000 | 16.036520000 | 3.693371000  |
| 1  | 7.960116000 | 15.773467000 | 5.118754000  |
| 6  | 8.121831000 | 14.447580000 | 2.346634000  |
| 1  | 8.685525000 | 13.609493000 | 1.925597000  |
| 1  | 8.724689000 | 15.359768000 | 2.255834000  |
| 6  | 6.822395000 | 14.581278000 | 1.592516000  |
| 6  | 6.647101000 | 15.524474000 | 0.589187000  |
| 1  | 7.433122000 | 16.232472000 | 0.358610000  |
| 6  | 5.421956000 | 15.535140000 | -0.103104000 |
| 1  | 5.240233000 | 16.275591000 | -0.874670000 |
| 6  | 4.444143000 | 14.604431000 | 0.198899000  |
| 1  | 3.498221000 | 14.614207000 | -0.323636000 |
| 6  | 4.684988000 | 13.633093000 | 1.214548000  |
| 6  | 2.575182000 | 12.410488000 | 0.733105000  |

|                                            |              |              |              |
|--------------------------------------------|--------------|--------------|--------------|
| 1                                          | 2.779567000  | 12.593497000 | -0.330005000 |
| 1                                          | 1.792150000  | 13.121521000 | 1.039654000  |
| 6                                          | 2.016905000  | 10.967297000 | 0.862448000  |
| 6                                          | 0.779139000  | 10.879527000 | -0.062916000 |
| 1                                          | 0.331016000  | 9.881144000  | -0.003963000 |
| 1                                          | 1.052335000  | 11.067114000 | -1.108596000 |
| 1                                          | 0.014875000  | 11.610976000 | 0.227849000  |
| 6                                          | 1.581383000  | 10.667877000 | 2.315906000  |
| 1                                          | 2.433870000  | 10.675381000 | 3.002687000  |
| 1                                          | 1.115095000  | 9.676828000  | 2.372417000  |
| 1                                          | 0.848249000  | 11.406661000 | 2.663439000  |
| 6                                          | 3.073735000  | 9.936270000  | 0.402993000  |
| 1                                          | 3.963354000  | 9.959846000  | 1.041167000  |
| 1                                          | 3.390951000  | 10.133658000 | -0.628511000 |
| 1                                          | 2.656307000  | 8.922967000  | 0.441178000  |
| 6                                          | 9.030587000  | 13.536880000 | 4.479182000  |
| 1                                          | 9.709163000  | 14.326678000 | 4.821819000  |
| 1                                          | 9.559326000  | 12.936886000 | 3.736861000  |
| 6                                          | 8.611546000  | 12.561186000 | 5.628207000  |
| 6                                          | 8.254763000  | 13.247703000 | 6.963017000  |
| 6                                          | 7.296540000  | 12.644653000 | 7.797275000  |
| 1                                          | 6.794213000  | 11.750248000 | 7.450191000  |
| 6                                          | 6.988878000  | 13.188095000 | 9.048410000  |
| 1                                          | 6.245852000  | 12.705164000 | 9.675658000  |
| 6                                          | 7.635489000  | 14.348871000 | 9.493810000  |
| 1                                          | 7.396579000  | 14.771863000 | 10.464338000 |
| 6                                          | 8.595492000  | 14.954282000 | 8.676879000  |
| 1                                          | 9.108634000  | 15.851082000 | 9.009940000  |
| 6                                          | 8.904430000  | 14.406467000 | 7.423741000  |
| 1                                          | 9.663470000  | 14.892941000 | 6.820591000  |
| 6                                          | 9.771657000  | 11.554980000 | 5.844472000  |
| 6                                          | 10.881154000 | 11.859365000 | 6.651930000  |
| 1                                          | 10.925038000 | 12.800616000 | 7.187941000  |
| 6                                          | 11.934634000 | 10.946612000 | 6.790742000  |
| 1                                          | 12.782424000 | 11.198741000 | 7.420532000  |
| 6                                          | 11.892520000 | 9.713817000  | 6.128895000  |
| 1                                          | 12.706781000 | 9.004655000  | 6.241219000  |
| 6                                          | 10.790806000 | 9.403954000  | 5.321678000  |
| 1                                          | 10.747359000 | 8.453389000  | 4.798446000  |
| 6                                          | 9.740260000  | 10.318053000 | 5.178106000  |
| 1                                          | 8.896144000  | 10.092699000 | 4.539274000  |
| 7                                          | 3.474612000  | 12.454813000 | 5.493838000  |
| 1                                          | 3.929639000  | 11.828650000 | 4.810602000  |
| 7                                          | 5.271070000  | 13.876825000 | 5.025240000  |
| 7                                          | 7.839700000  | 14.120455000 | 3.779861000  |
| 7                                          | 5.858956000  | 13.677313000 | 1.932214000  |
| 7                                          | 3.805475000  | 12.640266000 | 1.498412000  |
| 1                                          | 4.074497000  | 11.987816000 | 2.248162000  |
| 8                                          | 7.457310000  | 11.852832000 | 5.134628000  |
| 6                                          | 6.993721000  | 6.852583000  | 2.017458000  |
| 6                                          | 8.289030000  | 6.276454000  | 2.110719000  |
| 6                                          | 9.448765000  | 7.115608000  | 2.087640000  |
| 6                                          | 10.728518000 | 6.576942000  | 2.176037000  |
| 6                                          | 10.911860000 | 5.186194000  | 2.292216000  |
| 6                                          | 9.788829000  | 4.341546000  | 2.316960000  |
| 6                                          | 8.501812000  | 4.867525000  | 2.228069000  |
| 1                                          | 9.924336000  | 3.267580000  | 2.405990000  |
| 1                                          | 11.591934000 | 7.235325000  | 2.152310000  |
| 1                                          | 9.308202000  | 8.189437000  | 1.996737000  |
| 1                                          | 7.646947000  | 4.199467000  | 2.249194000  |
| 6                                          | 5.714586000  | 6.070726000  | 2.020411000  |
| 35                                         | 7.773654000  | 10.926136000 | 1.898878000  |
| 1                                          | 6.935627000  | 7.936206000  | 1.942497000  |
| 1                                          | 4.851358000  | 6.728422000  | 1.883827000  |
| 1                                          | 5.687624000  | 5.316196000  | 1.219378000  |
| 1                                          | 5.565100000  | 5.521212000  | 2.963393000  |
| 1                                          | 11.911566000 | 4.769648000  | 2.360885000  |
| <b><sup>5</sup>TS<sub>OH,1Br,PM</sub>:</b> |              |              |              |
| 26                                         | 6.778848000  | 12.306095000 | 3.480307000  |
| 8                                          | 5.653193000  | 10.654247000 | 3.293355000  |
| 1                                          | 5.731970000  | 10.004203000 | 4.017754000  |
| 6                                          | 3.501067000  | 9.001587000  | 6.255529000  |
| 1                                          | 4.525105000  | 9.379824000  | 6.154106000  |
| 1                                          | 3.215711000  | 8.521029000  | 5.311245000  |

|   |              |              |              |
|---|--------------|--------------|--------------|
| 1 | 3.506031000  | 8.233441000  | 7.037885000  |
| 6 | 1.097909000  | 9.558936000  | 6.793921000  |
| 1 | 1.082824000  | 8.809783000  | 7.594184000  |
| 1 | 0.753212000  | 9.074746000  | 5.871493000  |
| 1 | 0.379180000  | 10.346113000 | 7.054593000  |
| 6 | 2.973648000  | 10.803401000 | 7.940114000  |
| 1 | 3.966638000  | 11.254633000 | 7.835387000  |
| 1 | 3.025194000  | 10.057734000 | 8.742984000  |
| 1 | 2.271446000  | 11.585392000 | 8.254002000  |
| 6 | 2.521431000  | 10.138590000 | 6.621681000  |
| 6 | 2.459273000  | 11.180568000 | 5.461396000  |
| 1 | 2.092859000  | 10.664658000 | 4.565294000  |
| 1 | 1.716716000  | 11.948408000 | 5.703711000  |
| 6 | 4.170803000  | 13.041117000 | 5.498633000  |
| 6 | 3.408088000  | 13.911902000 | 6.318848000  |
| 1 | 2.442781000  | 13.604649000 | 6.694452000  |
| 6 | 3.911907000  | 15.166395000 | 6.626296000  |
| 1 | 3.328875000  | 15.845447000 | 7.239602000  |
| 6 | 5.170180000  | 15.553412000 | 6.146232000  |
| 1 | 5.586239000  | 16.526563000 | 6.378467000  |
| 6 | 5.895044000  | 14.645429000 | 5.372535000  |
| 6 | 7.305777000  | 15.019516000 | 4.965751000  |
| 1 | 7.325428000  | 16.082987000 | 4.692171000  |
| 1 | 7.936137000  | 14.919209000 | 5.852689000  |
| 6 | 7.823108000  | 14.915631000 | 2.557684000  |
| 1 | 8.452960000  | 14.363986000 | 1.851927000  |
| 1 | 8.193433000  | 15.947169000 | 2.633202000  |
| 6 | 6.410296000  | 14.904019000 | 2.019585000  |
| 6 | 5.849718000  | 16.019842000 | 1.409491000  |
| 1 | 6.397675000  | 16.952605000 | 1.362102000  |
| 6 | 4.554625000  | 15.901883000 | 0.874909000  |
| 1 | 4.076124000  | 16.759803000 | 0.414620000  |
| 6 | 3.879106000  | 14.694147000 | 0.937988000  |
| 1 | 2.878444000  | 14.612981000 | 0.538840000  |
| 6 | 4.509074000  | 13.571025000 | 1.545060000  |
| 6 | 2.617370000  | 12.002587000 | 1.051205000  |
| 1 | 2.387618000  | 12.696687000 | 0.237883000  |
| 1 | 1.845201000  | 12.139691000 | 1.824534000  |
| 6 | 2.500411000  | 10.563106000 | 0.475817000  |
| 6 | 1.071688000  | 10.422023000 | -0.102678000 |
| 1 | 0.924606000  | 9.415683000  | -0.511474000 |
| 1 | 0.897736000  | 11.144152000 | -0.909980000 |
| 1 | 0.312961000  | 10.586088000 | 0.672641000  |
| 6 | 2.698964000  | 9.504115000  | 1.585230000  |
| 1 | 3.688487000  | 9.572852000  | 2.048730000  |
| 1 | 2.590276000  | 8.495921000  | 1.166930000  |
| 1 | 1.942366000  | 9.621839000  | 2.371695000  |
| 6 | 3.533428000  | 10.358385000 | -0.654568000 |
| 1 | 4.556841000  | 10.486372000 | -0.287253000 |
| 1 | 3.372544000  | 11.080539000 | -1.464982000 |
| 1 | 3.444141000  | 9.350244000  | -1.076304000 |
| 6 | 9.289515000  | 13.715693000 | 4.189147000  |
| 1 | 9.904887000  | 14.513090000 | 4.626675000  |
| 1 | 9.737300000  | 13.424621000 | 3.239161000  |
| 6 | 9.252361000  | 12.434424000 | 5.101155000  |
| 6 | 9.009640000  | 12.776367000 | 6.587790000  |
| 6 | 8.068853000  | 12.042709000 | 7.326996000  |
| 1 | 7.513505000  | 11.264162000 | 6.820256000  |
| 6 | 7.847199000  | 12.312970000 | 8.683737000  |
| 1 | 7.112812000  | 11.732340000 | 9.234351000  |
| 6 | 8.566068000  | 13.325852000 | 9.329431000  |
| 1 | 8.393025000  | 13.539185000 | 10.379563000 |
| 6 | 9.516070000  | 14.059652000 | 8.606921000  |
| 1 | 10.086274000 | 14.843656000 | 9.095820000  |
| 6 | 9.737717000  | 13.784169000 | 7.251742000  |
| 1 | 10.491222000 | 14.355198000 | 6.717820000  |
| 6 | 10.598052000 | 11.671317000 | 4.924927000  |
| 6 | 10.913373000 | 11.153375000 | 3.651725000  |
| 1 | 10.219999000 | 11.299328000 | 2.829883000  |
| 6 | 12.096065000 | 10.439206000 | 3.436370000  |
| 1 | 12.315924000 | 10.052853000 | 2.445196000  |
| 6 | 12.992633000 | 10.215768000 | 4.490715000  |
| 1 | 13.910379000 | 9.660277000  | 4.323785000  |
| 6 | 12.687249000 | 10.713899000 | 5.760428000  |
| 1 | 13.366444000 | 10.544847000 | 6.590779000  |

|    |              |              |             |
|----|--------------|--------------|-------------|
| 6  | 11.501851000 | 11.433236000 | 5.974615000 |
| 1  | 11.290505000 | 11.804321000 | 6.969454000 |
| 7  | 3.730272000  | 11.810666000 | 5.106027000 |
| 1  | 4.317067000  | 11.336035000 | 4.418527000 |
| 7  | 5.414968000  | 13.419609000 | 5.041497000 |
| 7  | 7.911719000  | 14.210695000 | 3.871071000 |
| 7  | 5.750186000  | 13.714606000 | 2.111621000 |
| 7  | 3.943277000  | 12.329638000 | 1.587807000 |
| 1  | 4.447335000  | 11.606500000 | 2.104191000 |
| 8  | 8.186588000  | 11.603467000 | 4.606001000 |
| 6  | 6.996222000  | 8.648059000  | 2.536608000 |
| 6  | 6.935087000  | 7.889960000  | 3.743954000 |
| 6  | 7.625696000  | 8.372556000  | 4.898136000 |
| 6  | 7.601696000  | 7.648139000  | 6.087452000 |
| 6  | 6.899071000  | 6.434114000  | 6.162036000 |
| 6  | 6.207069000  | 5.947517000  | 5.038357000 |
| 6  | 6.215882000  | 6.663313000  | 3.845602000 |
| 1  | 5.664178000  | 5.010719000  | 5.102565000 |
| 1  | 8.126515000  | 8.023895000  | 6.959411000 |
| 1  | 8.136614000  | 9.332016000  | 4.839023000 |
| 1  | 5.680804000  | 6.278453000  | 2.984998000 |
| 6  | 6.404675000  | 8.226212000  | 1.239265000 |
| 35 | 8.251827000  | 11.726959000 | 0.951567000 |
| 1  | 7.670780000  | 9.495814000  | 2.500800000 |
| 1  | 6.380133000  | 9.067280000  | 0.545325000 |
| 1  | 7.033526000  | 7.442656000  | 0.783595000 |
| 1  | 5.398782000  | 7.807714000  | 1.338293000 |
| 1  | 6.886133000  | 5.870923000  | 7.089251000 |

<sup>5</sup>P<sub>OH,1Br,PM</sub>:

|    |             |              |              |
|----|-------------|--------------|--------------|
| 26 | 6.678855000 | 12.219210000 | 3.117977000  |
| 8  | 6.372511000 | 9.349656000  | 4.589136000  |
| 1  | 7.141045000 | 10.004444000 | 4.549209000  |
| 6  | 3.509374000 | 8.641439000  | 6.814543000  |
| 1  | 4.509558000 | 9.086410000  | 6.794533000  |
| 1  | 3.491417000 | 7.820150000  | 6.088558000  |
| 1  | 3.341278000 | 8.214575000  | 7.810723000  |
| 6  | 1.041073000 | 8.990054000  | 6.426426000  |
| 1  | 0.811172000 | 8.508854000  | 7.384261000  |
| 1  | 1.024396000 | 8.216690000  | 5.648225000  |
| 1  | 0.241444000 | 9.709618000  | 6.209315000  |
| 6  | 2.400731000 | 10.761485000 | 7.599781000  |
| 1  | 3.350199000 | 11.305785000 | 7.647212000  |
| 1  | 2.236701000 | 10.286973000 | 8.575066000  |
| 1  | 1.594199000 | 11.487720000 | 7.444182000  |
| 6  | 2.420881000 | 9.688032000  | 6.489524000  |
| 6  | 2.677887000 | 10.314819000 | 5.080139000  |
| 1  | 2.669874000 | 9.500851000  | 4.345373000  |
| 1  | 1.841554000 | 10.973813000 | 4.822000000  |
| 6  | 4.103266000 | 12.389908000 | 5.038684000  |
| 6  | 3.071408000 | 13.271164000 | 5.469325000  |
| 1  | 2.069688000 | 12.902307000 | 5.633218000  |
| 6  | 3.374497000 | 14.600193000 | 5.713346000  |
| 1  | 2.593058000 | 15.275145000 | 6.046428000  |
| 6  | 4.692626000 | 15.070248000 | 5.561383000  |
| 1  | 4.956064000 | 16.093554000 | 5.798541000  |
| 6  | 5.649853000 | 14.184002000 | 5.083944000  |
| 6  | 7.110004000 | 14.578064000 | 4.992085000  |
| 1  | 7.204561000 | 15.671477000 | 4.990798000  |
| 1  | 7.605627000 | 14.212003000 | 5.895703000  |
| 6  | 7.835886000 | 14.938979000 | 2.658951000  |
| 1  | 8.492721000 | 14.511520000 | 1.892990000  |
| 1  | 8.247349000 | 15.916142000 | 2.948230000  |
| 6  | 6.451436000 | 15.103884000 | 2.081361000  |
| 6  | 5.935409000 | 16.353050000 | 1.757522000  |
| 1  | 6.513588000 | 17.249622000 | 1.943269000  |
| 6  | 4.644073000 | 16.415419000 | 1.205097000  |
| 1  | 4.201765000 | 17.375158000 | 0.960364000  |
| 6  | 3.934760000 | 15.250019000 | 0.966919000  |
| 1  | 2.944961000 | 15.287758000 | 0.533864000  |
| 6  | 4.527246000 | 13.996275000 | 1.286025000  |
| 6  | 2.589617000 | 12.729666000 | 0.366272000  |
| 1  | 2.582073000 | 13.335861000 | -0.552484000 |
| 1  | 1.830478000 | 13.152108000 | 1.040342000  |
| 6  | 2.173854000 | 11.282749000 | -0.009150000 |



|                                        |              |              |              |
|----------------------------------------|--------------|--------------|--------------|
| 6                                      | 0.746061000  | 11.364121000 | -0.601163000 |
| 1                                      | 0.402563000  | 10.367283000 | -0.899831000 |
| 1                                      | 0.721539000  | 12.009427000 | -1.487957000 |
| 1                                      | 0.034490000  | 11.762429000 | 0.132530000  |
| 6                                      | 2.152768000  | 10.373693000 | 1.241462000  |
| 1                                      | 3.149384000  | 10.260939000 | 1.682273000  |
| 1                                      | 1.793029000  | 9.373265000  | 0.973443000  |
| 1                                      | 1.483860000  | 10.780693000 | 2.009471000  |
| 6                                      | 3.131588000  | 10.699665000 | -1.075656000 |
| 1                                      | 4.157089000  | 10.608130000 | -0.701461000 |
| 1                                      | 3.148196000  | 11.333623000 | -1.970950000 |
| 1                                      | 2.795284000  | 9.699908000  | -1.375449000 |
| 6                                      | 9.183207000  | 13.460742000 | 4.119289000  |
| 1                                      | 9.758885000  | 14.184552000 | 4.711254000  |
| 1                                      | 9.685525000  | 13.333333000 | 3.157899000  |
| 6                                      | 9.133926000  | 12.051269000 | 4.807296000  |
| 6                                      | 8.940266000  | 12.165505000 | 6.345326000  |
| 6                                      | 7.877686000  | 11.513715000 | 6.990295000  |
| 1                                      | 7.175430000  | 10.940765000 | 6.401892000  |
| 6                                      | 7.717352000  | 11.603772000 | 8.380039000  |
| 1                                      | 6.887447000  | 11.090497000 | 8.856736000  |
| 6                                      | 8.616197000  | 12.348556000 | 9.150770000  |
| 1                                      | 8.490972000  | 12.419375000 | 10.226659000 |
| 6                                      | 9.684405000  | 12.999383000 | 8.519006000  |
| 1                                      | 10.393970000 | 13.576584000 | 9.104052000  |
| 6                                      | 9.845725000  | 12.904124000 | 7.132719000  |
| 1                                      | 10.692109000 | 13.400803000 | 6.669241000  |
| 6                                      | 10.471855000 | 11.311880000 | 4.550065000  |
| 6                                      | 11.697810000 | 11.987127000 | 4.406635000  |
| 1                                      | 11.742375000 | 13.070262000 | 4.448591000  |
| 6                                      | 12.888928000 | 11.277353000 | 4.201207000  |
| 1                                      | 13.822653000 | 11.819964000 | 4.088310000  |
| 6                                      | 12.875962000 | 9.879875000  | 4.138654000  |
| 1                                      | 13.798175000 | 9.330099000  | 3.978891000  |
| 6                                      | 11.660195000 | 9.198312000  | 4.281864000  |
| 1                                      | 11.631986000 | 8.114025000  | 4.233564000  |
| 6                                      | 10.472424000 | 9.908591000  | 4.484514000  |
| 1                                      | 9.535010000  | 9.377224000  | 4.584833000  |
| 7                                      | 3.938624000  | 11.043077000 | 4.898608000  |
| 1                                      | 4.775912000  | 10.481024000 | 4.707424000  |
| 7                                      | 5.348933000  | 12.893924000 | 4.757873000  |
| 7                                      | 7.823185000  | 13.994996000 | 3.813516000  |
| 7                                      | 5.762127000  | 13.945275000 | 1.882052000  |
| 7                                      | 3.907043000  | 12.814867000 | 1.007116000  |
| 1                                      | 4.479464000  | 11.978504000 | 1.066336000  |
| 8                                      | 8.058569000  | 11.322367000 | 4.201896000  |
| 6                                      | 6.677427000  | 8.149891000  | 3.804233000  |
| 6                                      | 7.649804000  | 7.233051000  | 4.535598000  |
| 6                                      | 8.581976000  | 6.474396000  | 3.806576000  |
| 6                                      | 9.448929000  | 5.587597000  | 4.457768000  |
| 6                                      | 9.397800000  | 5.452650000  | 5.851383000  |
| 6                                      | 8.475984000  | 6.209986000  | 6.586555000  |
| 6                                      | 7.608158000  | 7.092829000  | 5.933107000  |
| 1                                      | 8.434886000  | 6.114444000  | 7.667456000  |
| 1                                      | 10.163257000 | 5.008667000  | 3.880252000  |
| 1                                      | 8.630398000  | 6.580814000  | 2.725893000  |
| 1                                      | 6.902308000  | 7.688344000  | 6.501471000  |
| 6                                      | 5.351675000  | 7.448031000  | 3.497469000  |
| 35                                     | 6.670138000  | 10.678894000 | 0.977303000  |
| 1                                      | 7.127869000  | 8.470160000  | 2.856529000  |
| 1                                      | 4.685663000  | 8.124264000  | 2.951601000  |
| 1                                      | 5.525248000  | 6.558571000  | 2.882236000  |
| 1                                      | 4.859714000  | 7.135742000  | 4.423744000  |
| 1                                      | 10.071481000 | 4.769064000  | 6.358566000  |
| <br>                                   |              |              |              |
| <sup>5</sup> TS <sub>Br,1Br,PM</sub> : |              |              |              |
| 26                                     | 6.183643000  | 11.907344000 | 4.154773000  |
| 8                                      | 4.650191000  | 10.703951000 | 4.232507000  |
| 1                                      | 4.802454000  | 9.743043000  | 4.286664000  |
| 6                                      | 2.394607000  | 10.296240000 | 7.593291000  |
| 1                                      | 3.466895000  | 10.403730000 | 7.393878000  |
| 1                                      | 1.974888000  | 9.611514000  | 6.845152000  |
| 1                                      | 2.278064000  | 9.831673000  | 8.579900000  |
| 6                                      | 0.169086000  | 11.471785000 | 7.811112000  |
| 1                                      | 0.001755000  | 11.025538000 | 8.798431000  |

|   |              |              |              |
|---|--------------|--------------|--------------|
| 1 | -0.278965000 | 10.808199000 | 7.060669000  |
| 1 | -0.364160000 | 12.430509000 | 7.779265000  |
| 6 | 2.277595000  | 12.597124000 | 8.629369000  |
| 1 | 3.343482000  | 12.776792000 | 8.450090000  |
| 1 | 2.173813000  | 12.145276000 | 9.623512000  |
| 1 | 1.763858000  | 13.566489000 | 8.646217000  |
| 6 | 1.680946000  | 11.666509000 | 7.551348000  |
| 6 | 1.832785000  | 12.295775000 | 6.131755000  |
| 1 | 1.357530000  | 11.619271000 | 5.410188000  |
| 1 | 1.273507000  | 13.236414000 | 6.092319000  |
| 6 | 3.876231000  | 13.693624000 | 5.663716000  |
| 6 | 3.310716000  | 14.925135000 | 6.096330000  |
| 1 | 2.302035000  | 14.956034000 | 6.482592000  |
| 6 | 4.063641000  | 16.085014000 | 6.018162000  |
| 1 | 3.630313000  | 17.028824000 | 6.332666000  |
| 6 | 5.385515000  | 16.039834000 | 5.546737000  |
| 1 | 5.998843000  | 16.931603000 | 5.501333000  |
| 6 | 5.905051000  | 14.805705000 | 5.162323000  |
| 6 | 7.377634000  | 14.694873000 | 4.829102000  |
| 1 | 7.715937000  | 15.621147000 | 4.346246000  |
| 1 | 7.916223000  | 14.621005000 | 5.778013000  |
| 6 | 7.842295000  | 13.865850000 | 2.547834000  |
| 1 | 8.367582000  | 13.045255000 | 2.048268000  |
| 1 | 8.415008000  | 14.790170000 | 2.391115000  |
| 6 | 6.474314000  | 13.976922000 | 1.917663000  |
| 6 | 6.201888000  | 14.922201000 | 0.933832000  |
| 1 | 6.942708000  | 15.666115000 | 0.668029000  |
| 6 | 4.946534000  | 14.877728000 | 0.302542000  |
| 1 | 4.691840000  | 15.611738000 | -0.454842000 |
| 6 | 4.029433000  | 13.897453000 | 0.645165000  |
| 1 | 3.059275000  | 13.863417000 | 0.169112000  |
| 6 | 4.365275000  | 12.943058000 | 1.648236000  |
| 6 | 2.305220000  | 11.603740000 | 1.275198000  |
| 1 | 2.465617000  | 11.774876000 | 0.202244000  |
| 1 | 1.488823000  | 12.274468000 | 1.588920000  |
| 6 | 1.833917000  | 10.133782000 | 1.451620000  |
| 6 | 0.594546000  | 9.944590000  | 0.544246000  |
| 1 | 0.199673000  | 8.927153000  | 0.645993000  |
| 1 | 0.847886000  | 10.105730000 | -0.510879000 |
| 1 | -0.204669000 | 10.645845000 | 0.815161000  |
| 6 | 1.431470000  | 9.852083000  | 2.918318000  |
| 1 | 2.282016000  | 9.961181000  | 3.598961000  |
| 1 | 1.050687000  | 8.827966000  | 3.015053000  |
| 1 | 0.637995000  | 10.537914000 | 3.241601000  |
| 6 | 2.945945000  | 9.153390000  | 1.011679000  |
| 1 | 3.836492000  | 9.246803000  | 1.642056000  |
| 1 | 3.243822000  | 9.341187000  | -0.027592000 |
| 1 | 2.588102000  | 8.118995000  | 1.079974000  |
| 6 | 9.002071000  | 12.834638000 | 4.492859000  |
| 1 | 9.787604000  | 13.569355000 | 4.713279000  |
| 1 | 9.343872000  | 12.186389000 | 3.685204000  |
| 6 | 8.687878000  | 11.915902000 | 5.726121000  |
| 6 | 8.702750000  | 12.691195000 | 7.071909000  |
| 6 | 7.597557000  | 12.622604000 | 7.934518000  |
| 1 | 6.737896000  | 12.044103000 | 7.621951000  |
| 6 | 7.606465000  | 13.293115000 | 9.164722000  |
| 1 | 6.741508000  | 13.227411000 | 9.818239000  |
| 6 | 8.721816000  | 14.044676000 | 9.552428000  |
| 1 | 8.728716000  | 14.566037000 | 10.504518000 |
| 6 | 9.832758000  | 14.115027000 | 8.701111000  |
| 1 | 10.706451000 | 14.690332000 | 8.992074000  |
| 6 | 9.824328000  | 13.440444000 | 7.474976000  |
| 1 | 10.702933000 | 13.494192000 | 6.839823000  |
| 6 | 9.740215000  | 10.785528000 | 5.821968000  |
| 6 | 11.086629000 | 10.970788000 | 5.461964000  |
| 1 | 11.428085000 | 11.923115000 | 5.069211000  |
| 6 | 12.013208000 | 9.927686000  | 5.595843000  |
| 1 | 13.047416000 | 10.088986000 | 5.307143000  |
| 6 | 11.608736000 | 8.684500000  | 6.094613000  |
| 1 | 12.325996000 | 7.876293000  | 6.197286000  |
| 6 | 10.268644000 | 8.491875000  | 6.456494000  |
| 1 | 9.942657000  | 7.530222000  | 6.841529000  |
| 6 | 9.344547000  | 9.532929000  | 6.320355000  |
| 1 | 8.304321000  | 9.387194000  | 6.584938000  |
| 7 | 3.209562000  | 12.507962000 | 5.687985000  |

|    |              |              |              |
|----|--------------|--------------|--------------|
| 1  | 3.694823000  | 11.702255000 | 5.259102000  |
| 7  | 5.169400000  | 13.664416000 | 5.185905000  |
| 7  | 7.766297000  | 13.518216000 | 3.995593000  |
| 7  | 5.574788000  | 13.030099000 | 2.296042000  |
| 7  | 3.543498000  | 11.916293000 | 1.991582000  |
| 1  | 3.848135000  | 11.327829000 | 2.783392000  |
| 8  | 7.395819000  | 11.346866000 | 5.513711000  |
| 6  | 8.423791000  | 8.201797000  | 0.540929000  |
| 6  | 9.602487000  | 7.694333000  | 1.181882000  |
| 6  | 10.841832000 | 8.378216000  | 1.023719000  |
| 6  | 12.007181000 | 7.901427000  | 1.616230000  |
| 6  | 11.978704000 | 6.726814000  | 2.387441000  |
| 6  | 10.768052000 | 6.036600000  | 2.557483000  |
| 6  | 9.596302000  | 6.508772000  | 1.968402000  |
| 1  | 10.742397000 | 5.128776000  | 3.151834000  |
| 1  | 12.940772000 | 8.438029000  | 1.480847000  |
| 1  | 10.865889000 | 9.287629000  | 0.430370000  |
| 1  | 8.670358000  | 5.963027000  | 2.111347000  |
| 6  | 7.139828000  | 7.439466000  | 0.425905000  |
| 35 | 7.495040000  | 10.252007000 | 2.204479000  |
| 1  | 8.567642000  | 9.025957000  | -0.150123000 |
| 1  | 6.334230000  | 8.084358000  | 0.069160000  |
| 1  | 7.249208000  | 6.609950000  | -0.292316000 |
| 1  | 6.825044000  | 7.000691000  | 1.378147000  |
| 1  | 12.887721000 | 6.355326000  | 2.848845000  |

<sup>5</sup>P<sub>Br,1Br,PM:</sub>

|    |             |              |              |
|----|-------------|--------------|--------------|
| 26 | 6.386153000 | 11.849417000 | 3.791100000  |
| 8  | 4.992243000 | 10.414411000 | 3.675845000  |
| 1  | 5.273730000 | 9.480605000  | 3.671049000  |
| 6  | 3.375874000 | 9.184971000  | 7.101914000  |
| 1  | 4.380152000 | 9.459008000  | 6.759430000  |
| 1  | 2.892190000 | 8.602449000  | 6.307408000  |
| 1  | 3.480598000 | 8.537924000  | 7.981231000  |
| 6  | 1.127296000 | 10.014533000 | 7.898303000  |
| 1  | 1.180711000 | 9.369125000  | 8.782990000  |
| 1  | 0.612412000 | 9.457686000  | 7.105195000  |
| 1  | 0.514358000 | 10.888251000 | 8.153914000  |
| 6  | 3.235261000 | 11.223802000 | 8.587367000  |
| 1  | 4.229751000 | 11.567619000 | 8.281787000  |
| 1  | 3.354452000 | 10.586682000 | 9.472414000  |
| 1  | 2.645004000 | 12.100488000 | 8.881891000  |
| 6  | 2.544640000 | 10.440552000 | 7.450010000  |
| 6  | 2.385830000 | 11.335237000 | 6.180917000  |
| 1  | 1.870372000 | 10.744045000 | 5.412999000  |
| 1  | 1.730492000 | 12.180310000 | 6.416514000  |
| 6  | 4.158165000 | 13.064526000 | 5.728125000  |
| 6  | 3.518349000 | 14.121925000 | 6.431232000  |
| 1  | 2.572946000 | 13.956607000 | 6.928012000  |
| 6  | 4.115427000 | 15.372349000 | 6.469136000  |
| 1  | 3.622199000 | 16.186371000 | 6.990544000  |
| 6  | 5.354913000 | 15.585949000 | 5.845556000  |
| 1  | 5.844892000 | 16.551718000 | 5.880841000  |
| 6  | 5.961686000 | 14.508827000 | 5.200917000  |
| 6  | 7.377053000 | 14.664747000 | 4.675691000  |
| 1  | 7.497238000 | 15.673879000 | 4.257274000  |
| 1  | 8.045630000 | 14.603716000 | 5.540104000  |
| 6  | 7.718328000 | 14.134684000 | 2.282350000  |
| 1  | 8.325311000 | 13.468338000 | 1.659616000  |
| 1  | 8.136857000 | 15.147176000 | 2.184398000  |
| 6  | 6.309840000 | 14.107980000 | 1.733883000  |
| 6  | 5.847557000 | 15.127011000 | 0.906694000  |
| 1  | 6.456914000 | 16.003630000 | 0.723628000  |
| 6  | 4.580349000 | 14.977823000 | 0.315189000  |
| 1  | 4.184120000 | 15.757608000 | -0.327091000 |
| 6  | 3.834249000 | 13.835689000 | 0.550965000  |
| 1  | 2.856397000 | 13.717290000 | 0.104906000  |
| 6  | 4.354156000 | 12.821398000 | 1.408472000  |
| 6  | 2.437418000 | 11.310082000 | 0.988225000  |
| 1  | 2.531006000 | 11.535251000 | -0.084060000 |
| 1  | 1.601558000 | 11.919646000 | 1.370078000  |
| 6  | 2.055901000 | 9.811242000  | 1.125448000  |
| 6  | 0.776618000 | 9.590089000  | 0.283116000  |
| 1  | 0.447588000 | 8.547053000  | 0.357194000  |
| 1  | 0.955342000 | 9.814529000  | -0.775793000 |

|    |              |              |              |
|----|--------------|--------------|--------------|
| 1  | -0.043688000 | 10.228692000 | 0.634463000  |
| 6  | 1.758461000  | 9.448962000  | 2.599554000  |
| 1  | 2.645963000  | 9.571767000  | 3.228324000  |
| 1  | 1.430609000  | 8.404587000  | 2.672514000  |
| 1  | 0.956800000  | 10.082323000 | 3.000999000  |
| 6  | 3.190428000  | 8.913647000  | 0.579497000  |
| 1  | 4.113297000  | 9.037620000  | 1.155384000  |
| 1  | 3.408174000  | 9.154265000  | -0.468649000 |
| 1  | 2.897135000  | 7.857994000  | 0.630656000  |
| 6  | 9.177594000  | 13.082441000 | 3.987615000  |
| 1  | 9.852264000  | 13.875691000 | 4.337121000  |
| 1  | 9.576016000  | 12.691136000 | 3.049543000  |
| 6  | 9.109132000  | 11.879261000 | 4.983543000  |
| 6  | 8.943031000  | 12.349943000 | 6.455504000  |
| 6  | 7.892054000  | 11.856316000 | 7.241741000  |
| 1  | 7.191766000  | 11.167592000 | 6.787143000  |
| 6  | 7.750535000  | 12.247886000 | 8.580179000  |
| 1  | 6.929195000  | 11.853276000 | 9.171469000  |
| 6  | 8.661466000  | 13.141271000 | 9.155303000  |
| 1  | 8.552289000  | 13.446590000 | 10.191323000 |
| 6  | 9.722531000  | 13.633089000 | 8.382307000  |
| 1  | 10.441749000 | 14.319624000 | 8.818957000  |
| 6  | 9.864436000  | 13.235502000 | 7.048126000  |
| 1  | 10.707052000 | 13.608939000 | 6.473319000  |
| 6  | 10.422656000 | 11.059064000 | 4.922234000  |
| 6  | 11.639318000 | 11.574097000 | 4.441940000  |
| 1  | 11.701251000 | 12.588570000 | 4.063473000  |
| 6  | 12.802852000 | 10.789500000 | 4.442106000  |
| 1  | 13.730253000 | 11.207925000 | 4.062593000  |
| 6  | 12.771310000 | 9.478964000  | 4.927652000  |
| 1  | 13.671801000 | 8.872834000  | 4.929774000  |
| 6  | 11.563563000 | 8.956091000  | 5.413354000  |
| 1  | 11.525969000 | 7.940273000  | 5.795705000  |
| 6  | 10.405446000 | 9.738798000  | 5.409061000  |
| 1  | 9.470838000  | 9.332063000  | 5.776014000  |
| 7  | 3.639175000  | 11.812217000 | 5.599717000  |
| 1  | 4.135881000  | 11.162908000 | 4.957204000  |
| 7  | 5.377105000  | 13.286761000 | 5.121603000  |
| 7  | 7.824241000  | 13.643643000 | 3.684947000  |
| 7  | 5.582677000  | 12.991878000 | 2.008215000  |
| 7  | 3.688746000  | 11.665383000 | 1.659860000  |
| 1  | 4.107891000  | 11.035067000 | 2.375549000  |
| 8  | 8.013340000  | 11.056653000 | 4.578766000  |
| 6  | 8.661537000  | 8.611374000  | 2.265322000  |
| 6  | 7.786659000  | 7.541580000  | 2.842458000  |
| 6  | 7.181301000  | 7.771276000  | 4.094486000  |
| 6  | 6.393770000  | 6.779338000  | 4.693493000  |
| 6  | 6.195526000  | 5.552987000  | 4.047536000  |
| 6  | 6.792441000  | 5.319386000  | 2.800025000  |
| 6  | 7.583180000  | 6.304971000  | 2.202387000  |
| 1  | 6.639922000  | 4.371148000  | 2.294522000  |
| 1  | 5.938839000  | 6.964386000  | 5.661687000  |
| 1  | 7.351369000  | 8.723925000  | 4.590116000  |
| 1  | 8.029143000  | 6.117568000  | 1.230732000  |
| 6  | 10.029901000 | 8.180597000  | 1.767262000  |
| 35 | 7.665301000  | 9.489040000  | 0.604609000  |
| 1  | 8.703892000  | 9.474763000  | 2.930447000  |
| 1  | 10.578547000 | 9.025366000  | 1.343450000  |
| 1  | 10.602143000 | 7.795912000  | 2.621336000  |
| 1  | 9.968530000  | 7.391199000  | 1.012966000  |
| 1  | 5.583000000  | 4.785317000  | 4.509451000  |
